# Supplementary material
Source: Elsevier journal article supplement (https://www.sciencedirect.com/science/article/pii/S2530064423000238)
Supplement: mmc1 [file S2530064423000238:mmc1.xlsx]

## Sheet: Planilha1
Hummingbird	Plant	Visitation behavior	Sexo	Adult	Author	Date of record	Date of publication	Localite (City/state)	Citation	Link
Anopetia_gounellei	Aechmea emmerichiae	Legitimate	Male	yes	Ricardo Pontes	2010-03-05	2014-04-13	Maturéia/PB	PONTES, R. A. (2010). [WA1114844, Anopetia gounellei (Boucard, 1891)]. Wiki Aves - A Enciclopédia das Aves do Brasil.Disponível em: <http://www.wikiaves.com/1114844> Acesso em: 28 Jan 2020.	http://www.wikiaves.com/1114844
Anopetia_gounellei	Aechmea emmerichiae	Legitimate	Not determined	yes	John Medcraft	2010-10-14	2010-10-17	Maturéia/PB	MEDCRAFT, J. P. (2010). [WA221746, Anopetia gounellei (Boucard, 1891)]. Wiki Aves - A Enciclopédia das Aves do Brasil.Disponível em: <http://www.wikiaves.com/221746> Acesso em: 28 Jan 2020.	http://www.wikiaves.com/221746
Anopetia_gounellei	Bignoniaceae (folha trifoliolada)	Legitimate	Not determined	yes	Igor S Costa	2017-10-15	2017-10-18	Trairi/CE	COSTA, I. S. (2017). [WA2741228, Anopetia gounellei (Boucard, 1891)]. Wiki Aves - A Enciclopédia das Aves do Brasil.Disponível em: <http://www.wikiaves.com/2741228> Acesso em: 27 Jan 2020.	http://www.wikiaves.com/2741228
Anopetia_gounellei	Bougainvillea	Legitimate	Male	yes	Antonio Tavora	2014-09-28	2014-10-21	Pacatuba/CE	TAVORA, A. J. (2014). [WA1489426, Anopetia gounellei (Boucard, 1891)]. Wiki Aves - A Enciclopédia das Aves do Brasil.Disponível em: <http://www.wikiaves.com/1489426> Acesso em: 28 Jan 2020.	http://www.wikiaves.com/1489426
Anopetia_gounellei	Cynophalla flexuosa	Legitimate	Male	yes	Chico Rasta	2016-11-03	2016-11-04	Araripe/CE	BRANDÃO, F. D. (2016). [WA2352523, Anopetia gounellei (Boucard, 1891)]. Wiki Aves - A Enciclopédia das Aves do Brasil.Disponível em: <http://www.wikiaves.com/2352523> Acesso em: 28 Jan 2020.	http://www.wikiaves.com/2352523
Anopetia_gounellei	Cynophalla flexuosa	Legitimate	Not determined	yes	João Sérgio Barros	2015-12-06	2015-12-10	Araripe/CE	SOUZA, J. S. (2015). [WA1942145, Anopetia gounellei (Boucard, 1891)]. Wiki Aves - A Enciclopédia das Aves do Brasil.Disponível em: <http://www.wikiaves.com/1942145> Acesso em: 28 Jan 2020.	http://www.wikiaves.com/1942145
Anopetia_gounellei	Melocactus sp.	Legitimate	Not determined	yes	Cristine Prates	2017-01-22	2019-07-02	Canudos/BA	PRATES, C. S. (2017). [WA3405591, Anopetia gounellei (Boucard, 1891)]. Wiki Aves - A Enciclopédia das Aves do Brasil.Disponível em: <http://www.wikiaves.com/3405591> Acesso em: 27 Jan 2020.	http://www.wikiaves.com/3405591
Anopetia_gounellei	Melocactus sp.	Legitimate	Not determined	yes	Celuta Machado	2014-11-03	2014-11-24	Canudos/BA	MACHADO, C. M. (2014). [WA1522500, Anopetia gounellei (Boucard, 1891)]. Wiki Aves - A Enciclopédia das Aves do Brasil.Disponível em: <http://www.wikiaves.com/1522500> Acesso em: 28 Jan 2020.	http://www.wikiaves.com/1522500
Anopetia_gounellei	Melocactus sp.	Legitimate	Not determined	yes	Silvana Licco	2014-11-03	2014-12-18	Canudos/BA	LICCO, S. C. (2014). [WA1550549, Anopetia gounellei (Boucard, 1891)]. Wiki Aves - A Enciclopédia das Aves do Brasil.Disponível em: <http://www.wikiaves.com/1550549> Acesso em: 28 Jan 2020.	http://www.wikiaves.com/1550549
Anopetia_gounellei	Opuntia	Legitimate	Not determined	yes	Jefferson Bob	2017-01-10	2017-01-12	Araripe/CE	LIMA, J. L. (2017). [WA2432417, Anopetia gounellei (Boucard, 1891)]. Wiki Aves - A Enciclopédia das Aves do Brasil.Disponível em: <http://www.wikiaves.com/2432417> Acesso em: 28 Jan 2020.	http://www.wikiaves.com/2432417
Anopetia_gounellei	Opuntia	Legitimate	Male	yes	Eduardo Fernandes 2	2017-01-07	2017-01-16	Araripe/CE	FERNANDES, E. (2017). [WA2436847, Anopetia gounellei (Boucard, 1891)]. Wiki Aves - A Enciclopédia das Aves do Brasil.Disponível em: <http://www.wikiaves.com/2436847> Acesso em: 28 Jan 2020.	http://www.wikiaves.com/2436847
Anopetia_gounellei	Opuntia	Legitimate	Not determined	yes	Jefferson Bob	2016-04-05	2016-04-05	Araripe/CE	LIMA, J. L. (2016). [WA2076131, Anopetia gounellei (Boucard, 1891)]. Wiki Aves - A Enciclopédia das Aves do Brasil.Disponível em: <http://www.wikiaves.com/2076131> Acesso em: 28 Jan 2020.	http://www.wikiaves.com/2076131
Anopetia_gounellei	Passiflora	Legitimate	Not determined	yes	Marcelo Holderbaum	2013-05-01	2013-05-10	Jeremoabo/BA	HOLDERBAUM, J. M. (2013). [WA957143, Anopetia gounellei (Boucard, 1891)]. Wiki Aves - A Enciclopédia das Aves do Brasil.Disponível em: <http://www.wikiaves.com/957143> Acesso em: 28 Jan 2020.	http://www.wikiaves.com/957143
Anopetia_gounellei	Ruellia	Legitimate	Indeterminado	yes	Eduardo Bergo	2020-09-16	2020-10-05	Araripe/CE	BERGO, E. S. (2020). [WA4005056, Anopetia gounellei (Boucard, 1891)]. Wiki Aves - A Enciclopédia das Aves do Brasil. Disponível em:	http://www.wikiaves.com/4005056
Anopetia_gounellei	Ruellia	Legitimate	Indeterminado	yes	Eduardo Bergo	2020-09-16	2020-10-05	Araripe/CE	BERGO, E. S. (2020). [WA4005057, Anopetia gounellei (Boucard, 1891)]. Wiki Aves - A Enciclopédia das Aves do Brasil. Disponível em:	http://www.wikiaves.com/4005057
Anopetia_gounellei	Tacinga inamoena	Legitimate	Indeterminado	yes	Ermerson Sharbel	2021-01-23	2021-01-23	Nova Palmeira/PB	DIAS, E. S. (2021). [WA4174489, Anopetia gounellei (Boucard, 1891)]. Wiki Aves - A Enciclopédia das Aves do Brasil. Disponível em:	http://www.wikiaves.com/4174489
Anopetia_gounellei	Melocactus	Legitimate	Male	yes	Ciro Albano	2020-10-22	2021-01-29	Campo Formoso/BA	ALBANO, C. (2020). [WA4182963, Anopetia gounellei (Boucard, 1891)]. Wiki Aves - A Enciclopédia das Aves do Brasil. Disponível em:	http://www.wikiaves.com/4182963
Anopetia_gounellei	Helicteres	Legitimate	Indeterminado	yes	Luiz Gonzaga	2021-02-21	2021-02-21	Cerro Corá/RN	GONZAGA, L. (2021). [WA4211246, Anopetia gounellei (Boucard, 1891)]. Wiki Aves - A Enciclopédia das Aves do Brasil. Disponível em:	http://www.wikiaves.com/4211246
Anopetia_gounellei	Helicteres	Legitimate	Indeterminado	yes	Luiz Gonzaga	2021-02-21	2021-02-21	Cerro Corá/RN	GONZAGA, L. (2021). [WA4211264, Anopetia gounellei (Boucard, 1891)]. Wiki Aves - A Enciclopédia das Aves do Brasil. Disponível em:	http://www.wikiaves.com/4211264
Anopetia_gounellei	Helicteres	Legitimate	Indeterminado	yes	Reinaldo Barros.	2021-02-21	2021-02-21	Cerro Corá/RN	SOUSA, R. B. (2021). [WA4211277, Anopetia gounellei (Boucard, 1891)]. Wiki Aves - A Enciclopédia das Aves do Brasil. Disponível em:	http://www.wikiaves.com/4211277
Anopetia_gounellei	Melocactus	Legitimate	Indeterminado	yes	Ermerson Sharbel	2021-01-25	2021-03-26	Nova Palmeira/PB	DIAS, E. S. (2021). [WA4248420, Anopetia gounellei (Boucard, 1891)]. Wiki Aves - A Enciclopédia das Aves do Brasil. Disponível em:	http://www.wikiaves.com/4248420
Anthracothorax_nigricollis	Aechmea nudicaulis	Legitimate	Male	yes	Ivan Rocha	2015-11-16	2015-11-16	Mafra/SC	ROCHA, I. (2015). [WA1913887, Anthracothorax nigricollis (Vieillot, 1817)]. Wiki Aves - A Enciclopédia das Aves do Brasil.Disponível em: <http://www.wikiaves.com/1913887> Acesso em: 14 Fev 2020.	http://www.wikiaves.com/1913887
Anthracothorax_nigricollis	Albizia	Legitimate	Male	yes	Décio Badari	2015-02-03	2015-02-05	Joanópolis/SP	BADARI, D. (2015). [WA1601852, Anthracothorax nigricollis (Vieillot, 1817)]. Wiki Aves - A Enciclopédia das Aves do Brasil.Disponível em: <http://www.wikiaves.com/1601852> Acesso em: 14 Fev 2020.	http://www.wikiaves.com/1601852
Anthracothorax_nigricollis	Alpinia zerumbet	Legitimate	Female	yes	Cibele Augusto	2016-10-30	2016-11-13	Ilhabela/SP	AUGUSTO, C. C. (2016). [WA2364667, Anthracothorax nigricollis (Vieillot, 1817)]. Wiki Aves - A Enciclopédia das Aves do Brasil.Disponível em: <http://www.wikiaves.com/2364667> Acesso em: 13 Fev 2020.	http://www.wikiaves.com/2364667
Anthracothorax_nigricollis	Bromeliaceae	Legitimate	Female	yes	Stephen Jones	2016-01-30	2016-01-31	Lagoa dos Gatos/PE	JONES, S. J. (2016). [WA2005281, Anthracothorax nigricollis (Vieillot, 1817)]. Wiki Aves - A Enciclopédia das Aves do Brasil.Disponível em: <http://www.wikiaves.com/2005281> Acesso em: 14 Fev 2020.	http://www.wikiaves.com/2005281
Anthracothorax_nigricollis	Clerodendrum x speciosum	Legitimate	Female	yes	Salli Baggenstoss	2019-05-26	2019-05-27	Sinop/MT	BAGGENSTOSS, S. (2019). [WA3369468, Anthracothorax nigricollis (Vieillot, 1817)]. Wiki Aves - A Enciclopédia das Aves do Brasil.Disponível em: <http://www.wikiaves.com/3369468> Acesso em: 12 Fev 2020.	http://www.wikiaves.com/3369468
Anthracothorax_nigricollis	Erythrina crista-galli	Legitimate	Female	Not determined	Bernardo Clausi	2012-01-14	2012-01-22	Campina Grande do Sul/PR	CLAUSI, B. (2012). [WA553537, Anthracothorax nigricollis (Vieillot, 1817)]. Wiki Aves - A Enciclopédia das Aves do Brasil.Disponível em: <http://www.wikiaves.com/553537> Acesso em: 14 Fev 2020.	http://www.wikiaves.com/553537
Anthracothorax_nigricollis	Erythrina speciosa	Legitimate	Female	yes	Valmiro Felippe	2019-06-29	2019-07-08	Cascavel/PR	FELIPPE, V. (2019). [WA3412089, Anthracothorax nigricollis (Vieillot, 1817)]. Wiki Aves - A Enciclopédia das Aves do Brasil.Disponível em: <http://www.wikiaves.com/3412089> Acesso em: 12 Fev 2020.	http://www.wikiaves.com/3412089
Anthracothorax_nigricollis	Erythrina speciosa	Legitimate	Female	yes	Tarcisio Pavanelli	2018-10-13	2018-10-16	Antonina/PR	PAVANELLI, T. (2018). [WA3148359, Anthracothorax nigricollis (Vieillot, 1817)]. Wiki Aves - A Enciclopédia das Aves do Brasil.Disponível em: <http://www.wikiaves.com/3148359> Acesso em: 12 Fev 2020.	http://www.wikiaves.com/3148359
Anthracothorax_nigricollis	Erythrina Speciosa	Legitimate	Female	yes	Erivelton dos Anjos	2018-10-13	2018-10-14	Antonina/PR	ANJOS, E. D. (2018). [WA3145575, Anthracothorax nigricollis (Vieillot, 1817)]. Wiki Aves - A Enciclopédia das Aves do Brasil.Disponível em: <http://www.wikiaves.com/3145575> Acesso em: 13 Fev 2020.	http://www.wikiaves.com/3145575
Anthracothorax_nigricollis	Erythrina speciosa	Legitimate	Female	yes	Filipe Bernardi	2016-08-03	2016-09-06	Florianópolis/SC	BERNARDI, F. (2016). [WA2266377, Anthracothorax nigricollis (Vieillot, 1817)]. Wiki Aves - A Enciclopédia das Aves do Brasil.Disponível em: <http://www.wikiaves.com/2266377> Acesso em: 13 Fev 2020.	http://www.wikiaves.com/2266377
Anthracothorax_nigricollis	Erythrina speciosa	Legitimate	Female	yes	Zenaro	2015-08-16	2015-08-16	São Pedro/SP	ZENARO, A. M. (2015). [WA1800147, Anthracothorax nigricollis (Vieillot, 1817)]. Wiki Aves - A Enciclopédia das Aves do Brasil.Disponível em: <http://www.wikiaves.com/1800147> Acesso em: 14 Fev 2020.	http://www.wikiaves.com/1800147
Anthracothorax_nigricollis	Etlingera elatior	Legitimate	Male	yes	Fábio Giordano	2017-12-20	2017-12-29	Ubatuba/SP	GIORDANO, F. M. (2017). [WA2829505, Anthracothorax nigricollis (Vieillot, 1817)]. Wiki Aves - A Enciclopédia das Aves do Brasil.Disponível em: <http://www.wikiaves.com/2829505> Acesso em: 12 Fev 2020.	http://www.wikiaves.com/2829505
Anthracothorax_nigricollis	Etlingera elatior	Legitimate	Male	yes	Rafael Fortes	2009-09-26	2009-11-04	Ubatuba/SP	FORTES, R. (2009). [WA76193, Anthracothorax nigricollis (Vieillot, 1817)]. Wiki Aves - A Enciclopédia das Aves do Brasil.Disponível em: <http://www.wikiaves.com/76193> Acesso em: 17 Fev 2020.	http://www.wikiaves.com/76193
Anthracothorax_nigricollis	Grevillea banksii	Legitimate	Male	yes	Rose Passarinho	2019-09-20	2019-09-26	Itacaré/BA	RODRIGUES, R. M. (2019). [WA3505484, Anthracothorax nigricollis (Vieillot, 1817)]. Wiki Aves - A Enciclopédia das Aves do Brasil.Disponível em: <http://www.wikiaves.com/3505484> Acesso em: 12 Fev 2020.	http://www.wikiaves.com/3505484
Anthracothorax_nigricollis	Grevillea banksii	Legitimate	Male	yes	Climério Brito	2019-10-18	2019-10-18	Brasília/DF	BRITO, C. (2019). [WA3548296, Anthracothorax nigricollis (Vieillot, 1817)]. Wiki Aves - A Enciclopédia das Aves do Brasil.Disponível em: <http://www.wikiaves.com/3548296> Acesso em: 12 Fev 2020.	http://www.wikiaves.com/3548296
Anthracothorax_nigricollis	Grevillea banksii	Legitimate	Female	yes	Pablo Junot	2018-10-11	2018-10-12	Itacaré/BA	JUNOT, P. (2018). [WA3143696, Anthracothorax nigricollis (Vieillot, 1817)]. Wiki Aves - A Enciclopédia das Aves do Brasil.Disponível em: <http://www.wikiaves.com/3143696> Acesso em: 12 Fev 2020.	http://www.wikiaves.com/3143696
Anthracothorax_nigricollis	Grevillea banksii	Legitimate	Female	yes	Valter Schinaider	2017-03-11	2017-03-12	São Gabriel da Palha/ES	SCHINAIDER, V. (2017). [WA2494234, Anthracothorax nigricollis (Vieillot, 1817)]. Wiki Aves - A Enciclopédia das Aves do Brasil.Disponível em: <http://www.wikiaves.com/2494234> Acesso em: 13 Fev 2020.	http://www.wikiaves.com/2494234
Anthracothorax_nigricollis	Grevillea banksii	Legitimate	Female	yes	Ulisses Nemetz	2015-10-27	2016-09-29	Porto Seguro/BA	NEMETZ, U. (2015). [WA2302067, Anthracothorax nigricollis (Vieillot, 1817)]. Wiki Aves - A Enciclopédia das Aves do Brasil.Disponível em: <http://www.wikiaves.com/2302067> Acesso em: 14 Fev 2020.	http://www.wikiaves.com/2302067
Anthracothorax_nigricollis	Grevillea banksii	Legitimate	Female	yes	Eduardo A. Santos	2010-02-15	2014-07-02	Salto de Pirapora/SP	SANTOS, E. A. (2010). [WA1373208, Anthracothorax nigricollis (Vieillot, 1817)]. Wiki Aves - A Enciclopédia das Aves do Brasil.Disponível em: <http://www.wikiaves.com/1373208> Acesso em: 14 Fev 2020.	http://www.wikiaves.com/1373208
Anthracothorax_nigricollis	Grevillea banksii	Legitimate	Male	yes	Dimas Correia	2014-11-23	2014-11-26	Mato Rico/PR	CORREIA, D. (2014). [WA1528728, Anthracothorax nigricollis (Vieillot, 1817)]. Wiki Aves - A Enciclopédia das Aves do Brasil.Disponível em: <http://www.wikiaves.com/1528728> Acesso em: 14 Fev 2020.	http://www.wikiaves.com/1528728
Anthracothorax_nigricollis	Grevillea banksii	Legitimate	Female	yes	Gustavo Pedro de Paula	2010-10-13	2015-02-06	Itacaré/BA	PAULA, G. P. (2010). [WA1602678, Anthracothorax nigricollis (Vieillot, 1817)]. Wiki Aves - A Enciclopédia das Aves do Brasil.Disponível em: <http://www.wikiaves.com/1602678> Acesso em: 14 Fev 2020.	http://www.wikiaves.com/1602678
Anthracothorax_nigricollis	Grevillea banksii	Legitimate	Female	yes	Leonardo Gustman	2013-04-03	2013-08-02	Quedas do Iguaçu/PR	GUSTMAN, L. G. (2013). [WA1036247, Anthracothorax nigricollis (Vieillot, 1817)]. Wiki Aves - A Enciclopédia das Aves do Brasil.Disponível em: <http://www.wikiaves.com/1036247> Acesso em: 14 Fev 2020.	http://www.wikiaves.com/1036247
Anthracothorax_nigricollis	Grevillea banksii	Legitimate	Female	yes	Fernando Cipriani	2011-11-27	2011-11-28	Bragança Paulista/SP	CIPRIANI, F. (2011). [WA507644, Anthracothorax nigricollis (Vieillot, 1817)]. Wiki Aves - A Enciclopédia das Aves do Brasil.Disponível em: <http://www.wikiaves.com/507644> Acesso em: 17 Fev 2020.	http://www.wikiaves.com/507644
Anthracothorax_nigricollis	Heliconia	Legitimate	Male	yes	Mariza Sanches	2012-12-26	2013-01-04	Piraju/SP	SANCHES, M. (2012). [WA846223, Anthracothorax nigricollis (Vieillot, 1817)]. Wiki Aves - A Enciclopédia das Aves do Brasil.Disponível em: <http://www.wikiaves.com/846223> Acesso em: 14 Fev 2020.	http://www.wikiaves.com/846223
Anthracothorax_nigricollis	Inga	Legitimate	Not determined	yes	Petronio Mamed	2017-05-05	2017-05-06	Jequitinhonha/MG	DAVID, P. M. (2017). [WA2548543, Anthracothorax nigricollis (Vieillot, 1817)]. Wiki Aves - A Enciclopédia das Aves do Brasil.Disponível em: <http://www.wikiaves.com/2548543> Acesso em: 13 Fev 2020.	http://www.wikiaves.com/2548543
Anthracothorax_nigricollis	Inga	Legitimate	Male	yes	Marcia Costa Guedes	2016-02-07	2016-06-18	Ituberá/BA	GUEDES, M. C. (2016). [WA2160056, Anthracothorax nigricollis (Vieillot, 1817)]. Wiki Aves - A Enciclopédia das Aves do Brasil.Disponível em: <http://www.wikiaves.com/2160056> Acesso em: 13 Fev 2020.	http://www.wikiaves.com/2160056
Anthracothorax_nigricollis	Inga	Legitimate	Male	yes	Paulo Bruno Nunes	2016-10-25	2016-10-26	Aguiar/PB	NUNES, P. B. (2016). [WA2338640, Anthracothorax nigricollis (Vieillot, 1817)]. Wiki Aves - A Enciclopédia das Aves do Brasil.Disponível em: <http://www.wikiaves.com/2338640> Acesso em: 14 Fev 2020.	http://www.wikiaves.com/2338640
Anthracothorax_nigricollis	Inga	Legitimate	Male	yes	Glauko Correa	2016-06-16	2016-06-20	Brasil Novo/PA	SILVA, G. C. (2016). [WA2162812, Anthracothorax nigricollis (Vieillot, 1817)]. Wiki Aves - A Enciclopédia das Aves do Brasil.Disponível em: <http://www.wikiaves.com/2162812> Acesso em: 14 Fev 2020.	http://www.wikiaves.com/2162812
Anthracothorax_nigricollis	Inga	Legitimate	Male	yes	Ale Bianco	2015-09-29	2015-10-09	Nova Veneza/SC	BIANCO, A. (2015). [WA1864439, Anthracothorax nigricollis (Vieillot, 1817)]. Wiki Aves - A Enciclopédia das Aves do Brasil.Disponível em: <http://www.wikiaves.com/1864439> Acesso em: 14 Fev 2020.	http://www.wikiaves.com/1864439
Anthracothorax_nigricollis	Inga	Legitimate	Female	yes	Joao O. Gomes	2012-08-06	2012-08-12	Ji-Paraná/RO	GOMES, J. P. (2012). [WA714534, Anthracothorax nigricollis (Vieillot, 1817)]. Wiki Aves - A Enciclopédia das Aves do Brasil.Disponível em: <http://www.wikiaves.com/714534> Acesso em: 14 Fev 2020.	http://www.wikiaves.com/714534
Anthracothorax_nigricollis	Inga	Legitimate	Male	yes	Roberto Velame	2012-12-20	2012-12-26	Vera Cruz/BA	FERREIRA, R. V. (2012). [WA838325, Anthracothorax nigricollis (Vieillot, 1817)]. Wiki Aves - A Enciclopédia das Aves do Brasil.Disponível em: <http://www.wikiaves.com/838325> Acesso em: 14 Fev 2020.	http://www.wikiaves.com/838325
Anthracothorax_nigricollis	Ixora coccinea	Legitimate	Female	yes	Fernando Filho	2011-05-01	2011-07-12	Belém/PA	FILHO, F. S. (2011). [WA392922, Anthracothorax nigricollis (Vieillot, 1817)]. Wiki Aves - A Enciclopédia das Aves do Brasil.Disponível em: <http://www.wikiaves.com/392922> Acesso em: 17 Fev 2020.	http://www.wikiaves.com/392922
Anthracothorax_nigricollis	Lantana camara	Legitimate	Male	yes	Arnon Borges	2018-10-15	2018-10-25	Itambé/BA	BORGES, A. C. (2018). [WA3157802, Anthracothorax nigricollis (Vieillot, 1817)]. Wiki Aves - A Enciclopédia das Aves do Brasil.Disponível em: <http://www.wikiaves.com/3157802> Acesso em: 12 Fev 2020.	http://www.wikiaves.com/3157802
Anthracothorax_nigricollis	Lantana camara	Legitimate	Not determined	yes	Franz Schuler	2016-11-21	2016-12-05	Brasília/DF	SCHULER, F. (2016). [WA2390295, Anthracothorax nigricollis (Vieillot, 1817)]. Wiki Aves - A Enciclopédia das Aves do Brasil.Disponível em: <http://www.wikiaves.com/2390295> Acesso em: 13 Fev 2020.	http://www.wikiaves.com/2390295
Anthracothorax_nigricollis	Lantana camara	Legitimate	Female	yes	Paulo Lahr	2016-11-20	2016-11-20	Brasília/DF	LAHR, P. (2016). [WA2373683, Anthracothorax nigricollis (Vieillot, 1817)]. Wiki Aves - A Enciclopédia das Aves do Brasil.Disponível em: <http://www.wikiaves.com/2373683> Acesso em: 13 Fev 2020.	http://www.wikiaves.com/2373683
Anthracothorax_nigricollis	Lantana camara	Legitimate	Female	yes	Bertrando Campos	2016-11-19	2016-12-02	Brasília/DF	CAMPOS, B. (2016). [WA2373891, Anthracothorax nigricollis (Vieillot, 1817)]. Wiki Aves - A Enciclopédia das Aves do Brasil.Disponível em: <http://www.wikiaves.com/2373891> Acesso em: 13 Fev 2020.	http://www.wikiaves.com/2373891
Anthracothorax_nigricollis	Asclepias curassavica	Legitimate	Female	yes	Julio Filipino (filipino)	2015-06-30	2015-07-03	Araras/SP	FILIPINO, J. C. (2015). [WA1745310, Anthracothorax nigricollis (Vieillot, 1817)]. Wiki Aves - A Enciclopédia das Aves do Brasil.Disponível em: <http://www.wikiaves.com/1745310> Acesso em: 14 Fev 2020.	http://www.wikiaves.com/1745310
Anthracothorax_nigricollis	Leonotis nepetifolia	Legitimate	Male	yes	Peterson Bachin	2014-11-21	2014-11-23	Piracicaba/SP	BACHIN, P. (2014). [WA1525066, Anthracothorax nigricollis (Vieillot, 1817)]. Wiki Aves - A Enciclopédia das Aves do Brasil.Disponível em: <http://www.wikiaves.com/1525066> Acesso em: 14 Fev 2020.	http://www.wikiaves.com/1525066
Anthracothorax_nigricollis	Malvaviscus arboreus	Legitimate	Female	yes	Madione Baldochi	2013-06-21	2014-08-17	Uberaba/MG	BALDOCHI, M. (2013). [WA1420572, Anthracothorax nigricollis (Vieillot, 1817)]. Wiki Aves - A Enciclopédia das Aves do Brasil.Disponível em: <http://www.wikiaves.com/1420572> Acesso em: 14 Fev 2020.	http://www.wikiaves.com/1420572
Anthracothorax_nigricollis	Musa	Legitimate	Male	yes	Leonardo Schuch Borges	2018-10-20	2018-10-21	Angra dos Reis/RJ	BORGES, L. S. (2018). [WA3152691, Anthracothorax nigricollis (Vieillot, 1817)]. Wiki Aves - A Enciclopédia das Aves do Brasil.Disponível em: <http://www.wikiaves.com/3152691> Acesso em: 12 Fev 2020.	http://www.wikiaves.com/3152691
Anthracothorax_nigricollis	Musa	Legitimate	Male	yes	Maria Weyermanns	2014-11-23	2015-09-05	Itajaí/SC	WEYERMANNS, M. I. (2014). [WA1822499, Anthracothorax nigricollis (Vieillot, 1817)]. Wiki Aves - A Enciclopédia das Aves do Brasil.Disponível em: <http://www.wikiaves.com/1822499> Acesso em: 14 Fev 2020.	http://www.wikiaves.com/1822499
Anthracothorax_nigricollis	Musa	Legitimate	Female	yes	Antonio Amorim Neto	2011-12-28	2011-12-28	Garopaba/SC	AMORIM, A. (2011). [WA532610, Anthracothorax nigricollis (Vieillot, 1817)]. Wiki Aves - A Enciclopédia das Aves do Brasil.Disponível em: <http://www.wikiaves.com/532610> Acesso em: 14 Fev 2020.	http://www.wikiaves.com/532610
Anthracothorax_nigricollis	Musa	Legitimate	Female	yes	Tim Hirsch	2006-10-21	2009-10-05	Miracatu/SP	HIRSCH, T. (2006). [WA65325, Anthracothorax nigricollis (Vieillot, 1817)]. Wiki Aves - A Enciclopédia das Aves do Brasil.Disponível em: <http://www.wikiaves.com/65325> Acesso em: 17 Fev 2020.	http://www.wikiaves.com/65325
Anthracothorax_nigricollis	Norantea guianensis	Legitimate	Female	yes	Cleto Cavalcante	2014-09-26	2014-10-18	Ananindeua/PA	CAVALCANTE, C. S. (2014). [WA1485429, Anthracothorax nigricollis (Vieillot, 1817)]. Wiki Aves - A Enciclopédia das Aves do Brasil.Disponível em: <http://www.wikiaves.com/1485429> Acesso em: 14 Fev 2020.	http://www.wikiaves.com/1485429
Anthracothorax_nigricollis	Odontomena	Legitimate	Female	yes	Diomar Mühlmann	2018-02-03	2018-02-03	Joinville/SC	MÜHLMANN, D. (2018). [WA2871716, Anthracothorax nigricollis (Vieillot, 1817)]. Wiki Aves - A Enciclopédia das Aves do Brasil.Disponível em: <http://www.wikiaves.com/2871716> Acesso em: 12 Fev 2020.	http://www.wikiaves.com/2871716
Anthracothorax_nigricollis	Odontomena	Legitimate	Female	yes	Dario Trachta	2010-02-06	2010-02-07	Batayporã/MS	TRACHTA, D. A. (2010). [WA106969, Anthracothorax nigricollis (Vieillot, 1817)]. Wiki Aves - A Enciclopédia das Aves do Brasil.Disponível em: <http://www.wikiaves.com/106969> Acesso em: 17 Fev 2020.	http://www.wikiaves.com/106969
Anthracothorax_nigricollis	Russelia equisetiformis	Legitimate	Female	yes	Frederico Swarofsky	2017-10-21	2017-12-14	Matinhos/PR	SWAROFSKY, F. (2017). [WA2814743, Anthracothorax nigricollis (Vieillot, 1817)]. Wiki Aves - A Enciclopédia das Aves do Brasil.Disponível em: <http://www.wikiaves.com/2814743> Acesso em: 12 Fev 2020.	http://www.wikiaves.com/2814743
Anthracothorax_nigricollis	Russelia equisetiformis	Legitimate	Female	yes	Gustavo Zaparoli	2017-03-14	2017-04-14	Mata de São João/BA	ZAPAROLI, G. (2017). [WA2525243, Anthracothorax nigricollis (Vieillot, 1817)]. Wiki Aves - A Enciclopédia das Aves do Brasil.Disponível em: <http://www.wikiaves.com/2525243> Acesso em: 13 Fev 2020.	http://www.wikiaves.com/2525243
Anthracothorax_nigricollis	Russelia equisetiformis	Legitimate	Male	yes	Eliomar Montenegro	2015-11-01	2016-09-08	São Sebastião do Passé/BA	MONTENEGRO, E. A. (2015). [WA2269797, Anthracothorax nigricollis (Vieillot, 1817)]. Wiki Aves - A Enciclopédia das Aves do Brasil.Disponível em: <http://www.wikiaves.com/2269797> Acesso em: 13 Fev 2020.	http://www.wikiaves.com/2269797
Anthracothorax_nigricollis	Spathodea campanulata	Legitimate	Female	yes	Paulo Venere	2019-05-23	2019-05-26	Guiratinga/MT	VENERE, P. C. (2019). [WA3368918, Anthracothorax nigricollis (Vieillot, 1817)]. Wiki Aves - A Enciclopédia das Aves do Brasil.Disponível em: <http://www.wikiaves.com/3368918> Acesso em: 12 Fev 2020.	http://www.wikiaves.com/3368918
Anthracothorax_nigricollis	Spathodea campanulata	Legitimate	Female	yes	Emerson Benizio	2015-03-29	2015-03-31	Cortês/PE	BENIZIO, E. J. (2015). [WA1650493, Anthracothorax nigricollis (Vieillot, 1817)]. Wiki Aves - A Enciclopédia das Aves do Brasil.Disponível em: <http://www.wikiaves.com/1650493> Acesso em: 14 Fev 2020.	http://www.wikiaves.com/1650493
Anthracothorax_nigricollis	Grevillea banksii	Legitimate	Female	yes	Luis Maluf	2020-08-05	2020-08-10	Uberaba/MG	MALUF, L. E. (2020). [WA3918510, Anthracothorax nigricollis (Vieillot, 1817)]. Wiki Aves - A Enciclopédia das Aves do Brasil. Disponível em:	http://www.wikiaves.com/3918510
Anthracothorax_nigricollis	Grevillea banksii	Legitimate	Male	yes	Luis Maluf	2020-08-09	2020-08-10	Uberaba/MG	MALUF, L. E. (2020). [WA3918504, Anthracothorax nigricollis (Vieillot, 1817)]. Wiki Aves - A Enciclopédia das Aves do Brasil. Disponível em:	http://www.wikiaves.com/3918504
Anthracothorax_nigricollis	Inga	Legitimate	Male	yes	Eden Fontes	2020-09-27	2020-09-30	Itatiba/SP	FONTES, E. C. (2020). [WA3997304, Anthracothorax nigricollis (Vieillot, 1817)]. Wiki Aves - A Enciclopédia das Aves do Brasil. Disponível em:	http://www.wikiaves.com/3997304
Anthracothorax_nigricollis	Erythrina speciosa	Legitimate	Female	yes	Ronald Santiago	2020-09-10	2020-09-24	Serra Negra/SP	SANTIAGO, R. D. (2020). [WA3987058, Anthracothorax nigricollis (Vieillot, 1817)]. Wiki Aves - A Enciclopédia das Aves do Brasil. Disponível em:	http://www.wikiaves.com/3987058
Anthracothorax_nigricollis	Iochroma arborescens	Legitimate	Female	yes	Gustavo Henrique Silveira	2020-10-16	2020-11-14	Iguaí/BA	SILVEIRA, G. H. (2020). [WA4074640, Anthracothorax nigricollis (Vieillot, 1817)]. Wiki Aves - A Enciclopédia das Aves do Brasil. Disponível em:	http://www.wikiaves.com/4074640
Anthracothorax_nigricollis	Odontonema sp	Legitimate	Female	yes	Joaquim Ribas	2021-01-17	2021-01-17	Porto União/SC	RIBAS, J. I. (2021). [WA4166548, Anthracothorax nigricollis (Vieillot, 1817)]. Wiki Aves - A Enciclopédia das Aves do Brasil. Disponível em:	http://www.wikiaves.com/4166548
Anthracothorax_nigricollis	Serjania	Legitimate	Male	yes	Thomaz Callado	2021-01-19	2021-01-19	Pitimbu/PB	CALLADO, T. C. (2021). [WA4170170, Anthracothorax nigricollis (Vieillot, 1817)]. Wiki Aves - A Enciclopédia das Aves do Brasil. Disponível em:	http://www.wikiaves.com/4170170
Anthracothorax_nigricollis	Grevillea banksii	Legitimate	Indeterminado	yes	Isabella Surjus	2020-12-25	2021-02-17	Londrina/PR	SURJUS, I. (2020). [WA4206374, Anthracothorax nigricollis (Vieillot, 1817)]. Wiki Aves - A Enciclopédia das Aves do Brasil. Disponível em:	http://www.wikiaves.com/4206374
Anthracothorax_nigricollis	Heliconia psittacorum	Legitimate	Female	yes	Pedro Assis	2021-02-02	2021-02-28	Porto Seguro/BA	ASSIS, P. L. (2021). [WA4219397, Anthracothorax nigricollis (Vieillot, 1817)]. Wiki Aves - A Enciclopédia das Aves do Brasil. Disponível em:	http://www.wikiaves.com/4219397
Anthracothorax_nigricollis	Grevillea banksii	Legitimate	Female	yes	Richard Stubing	2021-03-03	2021-03-08	Itatiba/SP	STÜBING, R. E. (2021). [WA4227475, Anthracothorax nigricollis (Vieillot, 1817)]. Wiki Aves - A Enciclopédia das Aves do Brasil. Disponível em:	http://www.wikiaves.com/4227475
Anthracothorax_nigricollis	Callianthe striata (Dicks. ex Lindl.) Donnell	Theft	Female	yes	Ivan Rocha	2017-11-11	2017-11-11	Mafra/SC	ROCHA, I. (2017). [WA2775859, Anthracothorax nigricollis (Vieillot, 1817)]. Wiki Aves - A Enciclopédia das Aves do Brasil.Disponível em: <http://www.wikiaves.com/2775859> Acesso em: 12 Fev 2020.	http://www.wikiaves.com/2775859
Anthracothorax_nigricollis	Ceiba speciosa	Theft	Female	yes	SilviaNishida	2019-03-16	2019-12-04	Botucatu/SP	NISHIDA, S. M. (2019). [WA3596174, Anthracothorax nigricollis (Vieillot, 1817)]. Wiki Aves - A Enciclopédia das Aves do Brasil.Disponível em: <http://www.wikiaves.com/3596174> Acesso em: 12 Fev 2020.	http://www.wikiaves.com/3596174
Anthracothorax_nigricollis	Ceiba speciosa	Theft	Male	yes	Luis Ricardo Baricati	2019-02-09	2019-02-11	Londrina/PR	BARICATI, L. R. (2019). [WA3277489, Anthracothorax nigricollis (Vieillot, 1817)]. Wiki Aves - A Enciclopédia das Aves do Brasil.Disponível em: <http://www.wikiaves.com/3277489> Acesso em: 12 Fev 2020.	http://www.wikiaves.com/3277489
Anthracothorax_nigricollis	Ceiba speciosa	Theft	Female	yes	Claudio Furini	2018-02-08	2018-02-13	Tenente Portela/RS	FURINI, C. J. (2018). [WA2882567, Anthracothorax nigricollis (Vieillot, 1817)]. Wiki Aves - A Enciclopédia das Aves do Brasil.Disponível em: <http://www.wikiaves.com/2882567> Acesso em: 12 Fev 2020.	http://www.wikiaves.com/2882567
Anthracothorax_nigricollis	Ceiba speciosa	Theft	Not determined	Not determined	Carlos Medici	2010-02-01	2010-02-02	São José dos Campos/SP	MEDICI, C. (2010). [WA105617, Anthracothorax nigricollis (Vieillot, 1817)]. Wiki Aves - A Enciclopédia das Aves do Brasil.Disponível em: <http://www.wikiaves.com/105617> Acesso em: 17 Fev 2020.	http://www.wikiaves.com/105617
Anthracothorax_nigricollis	Erythrina velutina Willd.	Theft	Female	yes	Ricardo R. Alves	2019-08-09	2019-08-26	Brasília/DF	ALVES, R. R. (2019). [WA3468481, Anthracothorax nigricollis (Vieillot, 1817)]. Wiki Aves - A Enciclopédia das Aves do Brasil.Disponível em: <http://www.wikiaves.com/3468481> Acesso em: 11 Fev 2020.	http://www.wikiaves.com/3468481
Anthracothorax_nigricollis	Hibiscus	Theft	Female	yes	Karoline Ceron	2016-02-12	2016-02-13	Jaguaruna/SC	CERON, K. (2016). [WA2020601, Anthracothorax nigricollis (Vieillot, 1817)]. Wiki Aves - A Enciclopédia das Aves do Brasil.Disponível em: <http://www.wikiaves.com/2020601> Acesso em: 13 Fev 2020.	http://www.wikiaves.com/2020601
Anthracothorax_nigricollis	Hibiscus	Theft	Female	yes	Luciano Faria	2015-09-20	2015-10-26	Novo Repartimento/PA	SILVA, L. F. (2015). [WA1887496, Anthracothorax nigricollis (Vieillot, 1817)]. Wiki Aves - A Enciclopédia das Aves do Brasil.Disponível em: <http://www.wikiaves.com/1887496> Acesso em: 14 Fev 2020.	http://www.wikiaves.com/1887496
Anthracothorax_nigricollis	Hibiscus	Theft	Male	yes	Breno FT	2014-01-16	2014-01-16	Bauru/SP	TAMAROZZI, B. (2014). [WA1217547, Anthracothorax nigricollis (Vieillot, 1817)]. Wiki Aves - A Enciclopédia das Aves do Brasil.Disponível em: <http://www.wikiaves.com/1217547> Acesso em: 14 Fev 2020.	http://www.wikiaves.com/1217547
Anthracothorax_nigricollis	Inga	Theft	Female	yes	Clenia Farias	2018-06-09	2018-06-26	Manacapuru/AM	FARIAS, C. L. (2018). [WA3010903, Anthracothorax nigricollis (Vieillot, 1817)]. Wiki Aves - A Enciclopédia das Aves do Brasil.Disponível em: <http://www.wikiaves.com/3010903> Acesso em: 12 Fev 2020.	http://www.wikiaves.com/3010903
Anthracothorax_nigricollis	Sanchezia	Theft	Female	yes	Marcelo Goulart	2014-02-24	2014-02-25	Vassouras/RJ	GOULART, M. (2014). [WA1256557, Anthracothorax nigricollis (Vieillot, 1817)]. Wiki Aves - A Enciclopédia das Aves do Brasil.Disponível em: <http://www.wikiaves.com/1256557> Acesso em: 14 Fev 2020.	http://www.wikiaves.com/1256557
Anthracothorax_nigricollis	Spathodea campanulata	Theft	Female	yes	Karin Mattje	2019-02-02	2019-09-28	Portão/RS	MATTJE, K. C. (2019). [WA3507070, Anthracothorax nigricollis (Vieillot, 1817)]. Wiki Aves - A Enciclopédia das Aves do Brasil.Disponível em: <http://www.wikiaves.com/3507070> Acesso em: 12 Fev 2020.	http://www.wikiaves.com/3507070
Anthracothorax_nigricollis	Strelitzia reginae	Theft	Female	yes	Ivan Rocha	2018-03-04	2018-03-04	Mafra/SC	ROCHA, I. (2018). [WA2903087, Anthracothorax nigricollis (Vieillot, 1817)]. Wiki Aves - A Enciclopédia das Aves do Brasil.Disponível em: <http://www.wikiaves.com/2903087> Acesso em: 12 Fev 2020.	http://www.wikiaves.com/2903087
Anthracothorax_nigricollis	Thunbergia mysorensis	Theft	Male	yes	Diomar Augusto de Quadros	2018-11-13	2019-09-24	Matinhos/PR	QUADROS, D. A. (2018). [WA3502216, Anthracothorax nigricollis (Vieillot, 1817)]. Wiki Aves - A Enciclopédia das Aves do Brasil.Disponível em: <http://www.wikiaves.com/3502216> Acesso em: 12 Fev 2020.	http://www.wikiaves.com/3502216
Anthracothorax_nigricollis	Malvaviscus arboreus	Robber	Male	yes	Lorena Patrício	2015-03-21	2015-05-11	Botucatu/SP	SILVA, L. P. (2015). [WA1691099, Anthracothorax nigricollis (Vieillot, 1817)]. Wiki Aves - A Enciclopédia das Aves do Brasil.Disponível em: <http://www.wikiaves.com/1691099> Acesso em: 14 Fev 2020.	http://www.wikiaves.com/1691099
Anthracothorax_nigricollis	Norantea guianensis	Robber	Female	yes	Hideko Helena Okita	2015-11-03	2015-12-04	Alta Floresta/MT	OKITA, H. H. (2015). [WA1934604, Anthracothorax nigricollis (Vieillot, 1817)]. Wiki Aves - A Enciclopédia das Aves do Brasil.Disponível em: <http://www.wikiaves.com/1934604> Acesso em: 14 Fev 2020.	http://www.wikiaves.com/1934604
Anthracothorax_nigricollis	Spathodea campanulata	Robber	Female	yes	João Abraão Filho	2020-01-19	2020-01-20	João Pessoa/PB	FILHO, J. C. (2020). [WA3650535, Anthracothorax nigricollis (Vieillot, 1817)]. Wiki Aves - A Enciclopédia das Aves do Brasil.Disponível em: <http://www.wikiaves.com/3650535> Acesso em: 12 Fev 2020.	http://www.wikiaves.com/3650535
Anthracothorax_nigricollis	Spathodea campanulata	Robber	Female	yes	Jaime F. Silva	2019-04-28	2019-04-28	Aquidauana/MS	SILVA, J. F. (2019). [WA3342384, Anthracothorax nigricollis (Vieillot, 1817)]. Wiki Aves - A Enciclopédia das Aves do Brasil.Disponível em: <http://www.wikiaves.com/3342384> Acesso em: 12 Fev 2020.	http://www.wikiaves.com/3342384
Anthracothorax_nigricollis	Spathodea campanulata	Robber	Female	yes	Elenilson VerísSimo	2018-04-12	2018-08-06	Pontalina/GO	VERÍSSIMO, E. (2018). [WA3062212, Anthracothorax nigricollis (Vieillot, 1817)]. Wiki Aves - A Enciclopédia das Aves do Brasil.Disponível em: <http://www.wikiaves.com/3062212> Acesso em: 12 Fev 2020.	http://www.wikiaves.com/3062212
Anthracothorax_nigricollis	Spathodea campanulata	Robber	Female	yes	Henrique Langenegger	2017-01-25	2017-03-01	Boa Nova/BA	LANGENEGGER, H. (2017). [WA2481840, Anthracothorax nigricollis (Vieillot, 1817)]. Wiki Aves - A Enciclopédia das Aves do Brasil.Disponível em: <http://www.wikiaves.com/2481840> Acesso em: 13 Fev 2020.	http://www.wikiaves.com/2481840
Anthracothorax_nigricollis	Spathodea campanulata	Robber	Female	yes	Rosane Taborda	2016-03-29	2016-03-29	Morretes/PR	TABORDA, R. (2016). [WA2069247, Anthracothorax nigricollis (Vieillot, 1817)]. Wiki Aves - A Enciclopédia das Aves do Brasil.Disponível em: <http://www.wikiaves.com/2069247> Acesso em: 13 Fev 2020.	http://www.wikiaves.com/2069247
Anthracothorax_nigricollis	Spathodea campanulata	Robber	Female	yes	Miguel Angelo Biz	2015-12-10	2015-12-15	Laurentino/SC	BIZ, M. A. (2015). [WA1947655, Anthracothorax nigricollis (Vieillot, 1817)]. Wiki Aves - A Enciclopédia das Aves do Brasil.Disponível em: <http://www.wikiaves.com/1947655> Acesso em: 14 Fev 2020.	http://www.wikiaves.com/1947655
Anthracothorax_nigricollis	Spathodea campanulata	Robber	Male	yes	Douglas Bete	2016-05-22	2016-05-22	Iperó/SP	BETE, D. (2016). [WA2127380, Anthracothorax nigricollis (Vieillot, 1817)]. Wiki Aves - A Enciclopédia das Aves do Brasil.Disponível em: <http://www.wikiaves.com/2127380> Acesso em: 13 Fev 2020.	http://www.wikiaves.com/2127380
Anthracothorax_nigricollis	Spathodea campanulata	Robber	Female	yes	Luiz Bravo	2015-04-11	2015-04-13	Londrina/PR	BRAVO (2015). [WA1662895, Anthracothorax nigricollis (Vieillot, 1817)]. Wiki Aves - A Enciclopédia das Aves do Brasil.Disponível em: <http://www.wikiaves.com/1662895> Acesso em: 14 Fev 2020.	http://www.wikiaves.com/1662895
Anthracothorax_nigricollis	Spathodea campanulata	Robber	Male	yes	Luana Braga	2015-01-11	2015-01-21	Pedralva/MG	BRAGA, L. S. (2015). [WA1587385, Anthracothorax nigricollis (Vieillot, 1817)]. Wiki Aves - A Enciclopédia das Aves do Brasil.Disponível em: <http://www.wikiaves.com/1587385> Acesso em: 14 Fev 2020.	http://www.wikiaves.com/1587385
Anthracothorax_nigricollis	Spathodea campanulata	Robber	Female	yes	Aluisio Ribeiro	2012-03-08	2012-03-10	Guaíra/PR	FREITAS, J. A. (2012). [WA592644, Anthracothorax nigricollis (Vieillot, 1817)]. Wiki Aves - A Enciclopédia das Aves do Brasil.Disponível em: <http://www.wikiaves.com/592644> Acesso em: 14 Fev 2020.	http://www.wikiaves.com/592644
Anthracothorax_nigricollis	Spathodea campanulata	Robber	Female	yes	Laurent Quéno	2012-05-06	2012-05-07	Anápolis/GO	QUÉNO, L. (2012). [WA634275, Anthracothorax nigricollis (Vieillot, 1817)]. Wiki Aves - A Enciclopédia das Aves do Brasil.Disponível em: <http://www.wikiaves.com/634275> Acesso em: 17 Fev 2020.	http://www.wikiaves.com/634275
Anthracothorax_nigricollis	Spathodea campanulata	Robber	Female	yes	Rafael Bordalo	2020-09-19	2020-09-19	Resende/RJ	BORDALO, R. S. (2020). [WA3978257, Anthracothorax nigricollis (Vieillot, 1817)]. Wiki Aves - A Enciclopédia das Aves do Brasil.Disponível em:	http://www.wikiaves.com/3978257
Anthracothorax_viridigula	Erythrina fusca	Legitimate	Male	yes	Sergio Berkenbrock	2017-09-02	2017-09-09	Iranduba/AM	BERKENBROCK, S. (2017). [WA2689802, Anthracothorax viridigula (Boddaert, 1783)]. Wiki Aves - A Enciclopédia das Aves do Brasil.Disponível em: <http://www.wikiaves.com/2689802> Acesso em: 11 Fev 2020.	http://www.wikiaves.com/2689802
Anthracothorax_viridigula	Erythrina fusca	Legitimate	Female	yes	Roberto Braga	2018-08-18	2018-09-14	Iranduba/AM	GOMES, R. B. (2018). [WA3108663, Anthracothorax viridigula (Boddaert, 1783)]. Wiki Aves - A Enciclopédia das Aves do Brasil.Disponível em: <http://www.wikiaves.com/3108663> Acesso em: 11 Fev 2020.	http://www.wikiaves.com/3108663
Anthracothorax_viridigula	Erythrina fusca	Legitimate	Not determined	No	Luiz VerísSimo	2015-09-19	2015-09-24	Iranduba/AM	VERÍSSIMO, L. C. (2015). [WA1847184, Anthracothorax viridigula (Boddaert, 1783)]. Wiki Aves - A Enciclopédia das Aves do Brasil.Disponível em: <http://www.wikiaves.com/1847184> Acesso em: 11 Fev 2020.	http://www.wikiaves.com/1847184
Anthracothorax_viridigula	Erythrina fusca	Legitimate	Not determined	Not determined	Roseli VerísSimo	2015-09-19	2016-02-03	Iranduba/AM	VERÍSSIMO, R. S. (2015). [WA2009260, Anthracothorax viridigula (Boddaert, 1783)]. Wiki Aves - A Enciclopédia das Aves do Brasil.Disponível em: <http://www.wikiaves.com/2009260> Acesso em: 11 Fev 2020.	http://www.wikiaves.com/2009260
Anthracothorax_viridigula	Erythrina fusca	Legitimate	Not determined	Not determined	Silvia Faustino Linhares	2015-08-27	2015-09-04	Iranduba/AM	LINHARES, S. F. (2015). [WA1822272, Anthracothorax viridigula (Boddaert, 1783)]. Wiki Aves - A Enciclopédia das Aves do Brasil.Disponível em: <http://www.wikiaves.com/1822272> Acesso em: 11 Fev 2020.	http://www.wikiaves.com/1822272
Anthracothorax_viridigula	Erythrina fusca	Legitimate	Male	yes	Anselmo d`Affonseca	2010-09-25	2010-09-25	Careiro da Várzea/AM	DAFFONSECA, J. A. (2010). [WA208181, Anthracothorax viridigula (Boddaert, 1783)]. Wiki Aves - A Enciclopédia das Aves do Brasil.Disponível em: <http://www.wikiaves.com/208181> Acesso em: 11 Fev 2020.	http://www.wikiaves.com/208181
Anthracothorax_viridigula	Erythrina fusca	Legitimate	Female	yes	Marcelo Alievi	2015-09-22	2016-01-11	Iranduba/AM	ALIEVI, M. M. (2015). [WA1978167, Anthracothorax viridigula (Boddaert, 1783)]. Wiki Aves - A Enciclopédia das Aves do Brasil.Disponível em: <http://www.wikiaves.com/1978167> Acesso em: 11 Fev 2020.	http://www.wikiaves.com/1978167
Anthracothorax_viridigula	Inga	Legitimate	Female	yes	Clenia Farias	2018-06-09	2018-06-18	Manaquiri/AM	FARIAS, C. L. (2018). [WA3008002, Anthracothorax viridigula (Boddaert, 1783)]. Wiki Aves - A Enciclopédia das Aves do Brasil.Disponível em: <http://www.wikiaves.com/3008002> Acesso em: 11 Fev 2020	http://www.wikiaves.com/3008002
Anthracothorax_viridigula	Psittacanthus	Legitimate	Female	yes	Eleonora Pinheiro	2016-04-03	2016-04-04	Iranduba/AM	PINHEIRO, E. (2016). [WA2075209, Anthracothorax viridigula (Boddaert, 1783)]. Wiki Aves - A Enciclopédia das Aves do Brasil.Disponível em: <http://www.wikiaves.com/2075209> Acesso em: 11 Fev 2020.	http://www.wikiaves.com/2075209
Anthracothorax_viridigula	Psittacanthus	Legitimate	Male	yes	José Kachimareck	2019-05-12	2019-05-21	iranduba/AM	KACHIMARECK, J. L. (2019). [WA3364400, Anthracothorax viridigula (Boddaert, 1783)]. Wiki Aves - A Enciclopédia das Aves do Brasil.Disponível em: <http://www.wikiaves.com/3364400> Acesso em: 11 Fev 2020.	http://www.wikiaves.com/3364400
Anthracothorax_viridigula	Psittacanthus	Legitimate	Male	yes	Robson Czaban	2014-05-03	2014-05-07	iranduba/AM	CZABAN, R. E. (2014). [WA1321681, Anthracothorax viridigula (Boddaert, 1783)]. Wiki Aves - A Enciclopédia das Aves do Brasil.Disponível em: <http://www.wikiaves.com/1321681> Acesso em: 11 Fev 2020.	http://www.wikiaves.com/1321681
Anthracothorax_viridigula	Erythrina fusca	Theft	Female	yes	Flavio Guglielmino	2011-08-06	2011-12-03	Manaus/AM	GUGLIELMINO, F. (2011). [WA512429, Anthracothorax viridigula (Boddaert, 1783)]. Wiki Aves - A Enciclopédia das Aves do Brasil.Disponível em: <http://www.wikiaves.com/512429> Acesso em: 11 Fev 2020.	http://www.wikiaves.com/512429
Anthracothorax_viridigula	Psittacanthus	Theft	Male	yes	Marcos Freitas	2019-04-28	2019-05-23	Careiro da Várzea/AM	FREITAS, M. A. (2019). [WA3366290, Anthracothorax viridigula (Boddaert, 1783)]. Wiki Aves - A Enciclopédia das Aves do Brasil.Disponível em: <http://www.wikiaves.com/3366290> Acesso em: 11 Fev 2020.	http://www.wikiaves.com/3366290
Aphantochroa_cirrochloris	Clerodendrum x speciosum	Legitimate	Not determined	yes	Frederico Swarofsky	2016-04-21	2016-04-29	Matinhos/PR	SWAROFSKY, F. (2016). [WA2093956, Aphantochroa cirrochloris (Vieillot, 1818)]. Wiki Aves - A Enciclopédia das Aves do Brasil. Disponível em: <http://www.wikiaves.com/2093956> Acesso em: 06 Set 2019.	http://www.wikiaves.com/2093956
Aphantochroa_cirrochloris	Erythrina speciosa	Legitimate	Not determined	Not determined	Lior Martins	2014-08-09	2015-06-02	Mendes/RJ	MARTINS, R. (2014). [WA1712577, Aphantochroa cirrochloris (Vieillot, 1818)]. Wiki Aves - A Enciclopédia das Aves do Brasil. Disponível em: <http://www.wikiaves.com/1712577> Acesso em: 07 Set 2019	http://www.wikiaves.com/1712577
Aphantochroa_cirrochloris	Grevillea banksii	Legitimate	Not determined	yes	Maria C. Rolim	2017-09-23	2017-10-26	Guaratuba/PR	ROLIM, M. C. (2017). [WA2752782, Aphantochroa cirrochloris (Vieillot, 1818)]. Wiki Aves - A Enciclopédia das Aves do Brasil. Disponível em: <http://www.wikiaves.com/2752782> Acesso em: 06 Set 2019.	http://www.wikiaves.com/2752782
Aphantochroa_cirrochloris	Salvia	Legitimate	Not determined	Not determined	Roberto Cirino	2011-01-04	2011-01-04	Guaratuba/PR	CIRINO, R. P. (2011). [WA272423, Aphantochroa cirrochloris (Vieillot, 1818)]. Wiki Aves - A Enciclopédia das Aves do Brasil. Disponível em: <http://www.wikiaves.com/272423> Acesso em: 07 Set 2019	http://www.wikiaves.com/272423
Aphantochroa_cirrochloris	Strelitzia reginae	Legitimate	Not determined	yes	Adhemar Duro	2010-04-09	2010-04-09	Balneário Camboriú/SC	JÚNIOR, A. M. (2010). [WA128072, Aphantochroa cirrochloris (Vieillot, 1818)]. Wiki Aves - A Enciclopédia das Aves do Brasil. Disponível em: <http://www.wikiaves.com/128072> Acesso em: 07 Set 2019.	http://www.wikiaves.com/128072
Aphantochroa_cirrochloris	Heliconia bihai	Legitimate	Indeterminado	yes	Fernando Binder	2021-01-27	2021-01-31	Bertioga/SP	BINDER, F. P. (2021). [WA4186074, Aphantochroa cirrochloris (Vieillot, 1818)]. Wiki Aves - A Enciclopédia das Aves do Brasil.Disponível em:	http://www.wikiaves.com/4186074
Aphantochroa_cirrochloris	Erythrina speciosa	Legitimate	Indeterminado	yes	Marques Conceição	2020-07-29	2020-07-30	São Sebastião/SP	CONCEIÇÃO, M. S. (2020). [WA3900822, Aphantochroa cirrochloris (Vieillot, 1818)]. Wiki Aves - A Enciclopédia das Aves do Brasil. Disponível em:	http://www.wikiaves.com/3900822
Aphantochroa_cirrochloris	Pseudobombax	Legitimate	Indeterminado	yes	Ale Bianco	2020-05-19	2020-06-23	Treviso/SC	BIANCO, A. (2020). [WA3849663, Aphantochroa cirrochloris (Vieillot, 1818)]. Wiki Aves - A Enciclopédia das Aves do Brasil. Disponível em:	http://www.wikiaves.com/3849663
Aphantochroa_cirrochloris	Hedychium coccineum	Theft	Not determined	yes	Sidnei Pereira	2015-01-09	2015-01-25	Praia Grande/SC	PEREIRA, S. (2015). [WA1590653, Aphantochroa cirrochloris (Vieillot, 1818)]. Wiki Aves - A Enciclopédia das Aves do Brasil. Disponível em: <http://www.wikiaves.com/1590653> Acesso em: 07 Set 2019.	http://www.wikiaves.com/1590653
Aphantochroa_cirrochloris	Thunbergia mysorensis	Theft	Indeterminado	yes	Davi Oliveira	2020-12-24	2021-02-10	Marechal Floriano/ES	OLIVEIRA, D. C. (2020). [WA4198437, Aphantochroa cirrochloris (Vieillot, 1818)]. Wiki Aves - A Enciclopédia das Aves do Brasil. Disponível em:	http://www.wikiaves.com/4198437
Aphantochroa_cirrochloris	Malvaviscus arboreus	Robber	Not determined	yes	Frederico Pereira	2008-04-01	2009-02-14	Santa Teresa/ES	ANDRADE, F. P. (2008). [WA8124, Aphantochroa cirrochloris (Vieillot, 1818)]. Wiki Aves - A Enciclopédia das Aves do Brasil. Disponível em: <http://www.wikiaves.com/8124> Acesso em: 07 Set 2019.	http://www.wikiaves.com/8124
Augastes_lumachella	Aechmea	Legitimate	Not determined	yes	Cárin Duarte	2018-01-02	2018-08-08	Lençóis/BA	DUARTE, C. C. (2018). [WA3065603, Augastes lumachella (Lesson, 1838)]. Wiki Aves - A Enciclopédia das Aves do Brasil.Disponível em: <http://www.wikiaves.com/3065603> Acesso em: 17 Mar 2020.	http://www.wikiaves.com/3065603
Augastes_lumachella	Aechmea	Legitimate	Male	yes	Júlio Silveira	2013-11-20	2013-12-18	Lençóis/BA	SILVEIRA, J. C. (2013). [WA1187304, Augastes lumachella (Lesson, 1838)]. Wiki Aves - A Enciclopédia das Aves do Brasil.Disponível em: <http://www.wikiaves.com/1187304> Acesso em: 17 Mar 2020.	http://www.wikiaves.com/1187304
Augastes_lumachella	Aechmea	Legitimate	Male	yes	Jefferson Bob	2016-07-31	2016-08-14	Mucugê/BA	LIMA, J. L. (2016). [WA2231500, Augastes lumachella (Lesson, 1838)]. Wiki Aves - A Enciclopédia das Aves do Brasil.Disponível em: <http://www.wikiaves.com/2231500> Acesso em: 17 Mar 2020.	http://www.wikiaves.com/2231500
Augastes_lumachella	Calliandra	Legitimate	Female	yes	Roseanne Almeida	2016-01-17	2016-02-25	Ibicoara/BA	ALMEIDA, R. F. (2016). [WA2035245, Augastes lumachella (Lesson, 1838)]. Wiki Aves - A Enciclopédia das Aves do Brasil.Disponível em: <http://www.wikiaves.com/2035245> Acesso em: 17 Mar 2020.	http://www.wikiaves.com/2035245
Augastes_lumachella	Calliandra	Legitimate	Not determined	yes	Belquior Carlini	2017-04-23	2017-04-24	Andaraí/BA	CARLINI, B. S. (2017). [WA2535521, Augastes lumachella (Lesson, 1838)]. Wiki Aves - A Enciclopédia das Aves do Brasil.Disponível em: <http://www.wikiaves.com/2535521> Acesso em: 17 Mar 2020.	http://www.wikiaves.com/2535521
Augastes_lumachella	Calliandra	Legitimate	Male	Not determined	Fredson Rocha	2012-04-30	2012-05-07	Palmeiras/BA	CAITANO, F. R. (2012). [WA634686, Augastes lumachella (Lesson, 1838)]. Wiki Aves - A Enciclopédia das Aves do Brasil.Disponível em: <http://www.wikiaves.com/634686> Acesso em: 17 Mar 2020.	http://www.wikiaves.com/634686
Augastes_lumachella	Calliandra	Legitimate	Male	No	Emerson Kaseker	2018-01-05	2018-08-11	Mucugê/BA	KASEKER, E. P. (2018). [WA3068494, Augastes lumachella (Lesson, 1838)]. Wiki Aves - A Enciclopédia das Aves do Brasil.Disponível em: <http://www.wikiaves.com/3068494> Acesso em: 17 Mar 2020.	http://www.wikiaves.com/3068494
Augastes_lumachella	Calliandra	Legitimate	Male	yes	João Andrade (Dedé)	2020-02-27	2020-03-08	Mucugê/BA	ANDRADE, J. (2020). [WA3712969, Augastes lumachella (Lesson, 1838)]. Wiki Aves - A Enciclopédia das Aves do Brasil.Disponível em: <http://www.wikiaves.com/3712969> Acesso em: 17 Mar 2020.	http://www.wikiaves.com/3712969
Augastes_lumachella	Calliandra	Legitimate	Male	yes	Fred Crema	2018-11-01	2018-11-25	Lençóis/BA	LEIS, F. C. (2018). [WA3192541, Augastes lumachella (Lesson, 1838)]. Wiki Aves - A Enciclopédia das Aves do Brasil.Disponível em: <http://www.wikiaves.com/3192541> Acesso em: 17 Mar 2020.	http://www.wikiaves.com/3192541
Augastes_scutatus	Calliandra	Legitimate	Male	yes	Emerson Kaseker	2015-01-03	2015-03-31	Santana do Riacho/MG	KASEKER, E. P. (2015). [WA1650761, Augastes scutatus (Temminck, 1824)]. Wiki Aves - A Enciclopédia das Aves do Brasil.Disponível em: <http://www.wikiaves.com/1650761> Acesso em: 09 Abr 2020.	http://www.wikiaves.com/1650761
Augastes_scutatus	Lychnophora	Legitimate	Not determined	Not determined	João Sérgio Barros	2012-10-21	2012-10-22	Santana do Riacho/MG	SOUZA, J. S. (2012). [WA781246, Augastes scutatus (Temminck, 1824)]. Wiki Aves - A Enciclopédia das Aves do Brasil.Disponível em: <http://www.wikiaves.com/781246> Acesso em: 09 Abr 2020.	http://www.wikiaves.com/781246
Augastes_scutatus	Lychnophora	Legitimate	Male	yes	João Sérgio Barros	2013-04-20	2013-04-26	Santana do Riacho/MG	SOUZA, J. S. (2013). [WA944031, Augastes scutatus (Temminck, 1824)]. Wiki Aves - A Enciclopédia das Aves do Brasil.Disponível em: <http://www.wikiaves.com/944031> Acesso em: 09 Abr 2020.	http://www.wikiaves.com/944031
Augastes_scutatus	Lychnophora	Legitimate	Male	yes	Adrian Eisen Rupp	2017-10-13	2017-10-19	Catas Altas/MG	RUPP, A. E. (2017). [WA2742504, Augastes scutatus (Temminck, 1824)]. Wiki Aves - A Enciclopédia das Aves do Brasil.Disponível em: <http://www.wikiaves.com/2742504> Acesso em: 09 Abr 2020.	http://www.wikiaves.com/2742504
Augastes_scutatus	Lychnophora	Legitimate	Female	yes	Ronaldo G. Lebowski	2017-03-11	2018-05-22	Santana do Riacho/MG	LEBOWSKI, R. G. (2017). [WA2979393, Augastes scutatus (Temminck, 1824)]. Wiki Aves - A Enciclopédia das Aves do Brasil.Disponível em: <http://www.wikiaves.com/2979393> Acesso em: 09 Abr 2020.	http://www.wikiaves.com/2979393
Augastes_scutatus	Lychnophora	Legitimate	Male	yes	Yan Sanglard	2018-09-15	2018-09-20	Santana do Riacho/MG	SANGLARD, Y. B. (2018). [WA3115556, Augastes scutatus (Temminck, 1824)]. Wiki Aves - A Enciclopédia das Aves do Brasil.Disponível em: <http://www.wikiaves.com/3115556> Acesso em: 09 Abr 2020.	http://www.wikiaves.com/3115556
Augastes_scutatus	Lychnophora	Legitimate	Male	yes	Fábio Giordano	2018-03-13	2018-03-15	Santana do Riacho/MG	GIORDANO, F. M. (2018). [WA2913427, Augastes scutatus (Temminck, 1824)]. Wiki Aves - A Enciclopédia das Aves do Brasil.Disponível em: <http://www.wikiaves.com/2913427> Acesso em: 09 Abr 2020	http://www.wikiaves.com/2913427
Augastes_scutatus	Lychnophora	Legitimate	Male	Not determined	Amaury Pimenta	2019-06-23	2019-06-23	Nova Lima/MG	PIMENTA, A. L. (2019). [WA3395561, Augastes scutatus (Temminck, 1824)]. Wiki Aves - A Enciclopédia das Aves do Brasil.Disponível em: <http://www.wikiaves.com/3395561> Acesso em: 09 Abr 2020.	http://www.wikiaves.com/3395561
Augastes_scutatus	Lychnophora	Legitimate	Male	yes	Leonardo Marujo	2019-10-13	2019-10-18	Catas Altas/MG	MARUJO, L. S. (2019). [WA3533541, Augastes scutatus (Temminck, 1824)]. Wiki Aves - A Enciclopédia das Aves do Brasil.Disponível em: <http://www.wikiaves.com/3533541> Acesso em: 09 Abr 2020.	http://www.wikiaves.com/3533541
Augastes_scutatus	Lychnophora	Legitimate	Male	yes	Vinícius Pimenta	2015-02-07	2015-02-10	Jaboticatubas/MG	PIMENTA, V. S. (2015). [WA1607265, Augastes scutatus (Temminck, 1824)]. Wiki Aves - A Enciclopédia das Aves do Brasil.Disponível em: <http://www.wikiaves.com/1607265> Acesso em: 09 Abr 2020.	http://www.wikiaves.com/1607265
Augastes_scutatus	Lychnophora	Legitimate	Male	yes	Deusdete Pinho	2016-04-02	2016-04-21	Santana do Riacho/MG	PINHO, D. B. (2016). [WA2091700, Augastes scutatus (Temminck, 1824)]. Wiki Aves - A Enciclopédia das Aves do Brasil.Disponível em: <http://www.wikiaves.com/2091700> Acesso em: 09 Abr 2020.	http://www.wikiaves.com/2091700
Augastes_scutatus	Lippia	Legitimate	Male	yes	Hilton Filho	2016-07-09	2016-07-27	Santana do Riacho/MG	FILHO, H. F. (2016). [WA2212258, Augastes scutatus (Temminck, 1824)]. Wiki Aves - A Enciclopédia das Aves do Brasil.Disponível em: <http://www.wikiaves.com/2212258> Acesso em: 09 Abr 2020.	http://www.wikiaves.com/2212258
Augastes_scutatus	Lippia	Legitimate	Male	yes	Rodrigo Mayworm	2017-07-26	2017-07-31	Santana do Riacho/MG	SILVA, R. M. (2017). [WA2642117, Augastes scutatus (Temminck, 1824)]. Wiki Aves - A Enciclopédia das Aves do Brasil.Disponível em: <http://www.wikiaves.com/2642117> Acesso em: 09 Abr 2020.	http://www.wikiaves.com/2642117
Augastes_scutatus	Lippia	Legitimate	Male	yes	Helberth Peixoto	2018-10-23	2018-12-05	Santana do Riacho/MG	PEIXOTO, H. J. (2018). [WA3203568, Augastes scutatus (Temminck, 1824)]. Wiki Aves - A Enciclopédia das Aves do Brasil.Disponível em: <http://www.wikiaves.com/3203568> Acesso em: 09 Abr 2020.	http://www.wikiaves.com/3203568
Augastes_scutatus	Vochysia acuminata	Legitimate	Male	yes	Flavio Guglielmino	2012-10-02	2012-10-18	Santana do Riacho/MG	GUGLIELMINO, F. (2012). [WA777601, Augastes scutatus (Temminck, 1824)]. Wiki Aves - A Enciclopédia das Aves do Brasil.Disponível em: <http://www.wikiaves.com/777601> Acesso em: 09 Abr 2020.	http://www.wikiaves.com/777601
Augastes_scutatus	Lychnophora	Legitimate	Male	yes	José Dionísio Bertuzzo	2021-03-12	2021-03-15	Santana do Riacho/MG	BERTUZZO, J. D. (2021). [WA4235120, Augastes scutatus (Temminck, 1824)]. Wiki Aves - A Enciclopédia das Aves do Brasil. Disponível em:	http://www.wikiaves.com/4235120
Augastes_scutatus	Cuphea sp	Legitimate	Male	No	Fernanda Sofal	2021-02-01	2021-02-01	Santana do Riacho/MG	SOFAL, F. S. (2021). [WA4187327, Augastes scutatus (Temminck, 1824)]. Wiki Aves - A Enciclopédia das Aves do Brasil. Disponível em:	http://www.wikiaves.com/4187327
Avocettula_recurvirostris	Dioclea	Legitimate	Not determined	Not determined	Luiz Fernando Carvalho	2014-03-04	2014-05-19	Manaus/AM	CARVALHO, L. F. (2014). [WA1332938, Avocettula recurvirostris (Swainson, 1822)]. Wiki Aves - A Enciclopédia das Aves do Brasil.Disponível em: <http://www.wikiaves.com/1332938> Acesso em: 17 Fev 2020.	http://www.wikiaves.com/1332938
Avocettula_recurvirostris	Dioclea	Legitimate	Female	Not determined	Bruno H. G. Carvalho	2014-10-07	2014-12-23	Ulianópolis/PA	CARVALHO, B. H. (2014). [WA1556114, Avocettula recurvirostris (Swainson, 1822)]. Wiki Aves - A Enciclopédia das Aves do Brasil.Disponível em: <http://www.wikiaves.com/1556114> Acesso em: 17 Fev 2020.	http://www.wikiaves.com/1556114
Avocettula_recurvirostris	Dioclea	Legitimate	Female	yes	Sidnei Dantas	2019-07-03	2019-07-03	Alta Floresta/MT	DANTAS, S. M. (2019). [WA3407483, Avocettula recurvirostris (Swainson, 1822)]. Wiki Aves - A Enciclopédia das Aves do Brasil.Disponível em: <http://www.wikiaves.com/3407483> Acesso em: 17 Fev 2020.	http://www.wikiaves.com/3407483
Calliphlox_amethystina	Agapanthus africanus (L.) Hoffmanns.	Legitimate	Male	yes	Rafael Peter	2018-12-31	2018-12-31	Pelotas/RS	PETER, R. R. (2018). [WA3231183, Calliphlox amethystina (Boddaert, 1783)]. Wiki Aves - A Enciclopédia das Aves do Brasil.Disponível em: <http://www.wikiaves.com/3231183> Acesso em: 22 Mar 2020.	http://www.wikiaves.com/3231183
Calliphlox_amethystina	Callistemon citrinus	Legitimate	Female	yes	Ramón Dueñas Nuñes	2017-09-12	2017-09-13	Guarulhos/SP	NUÑES, R. D. (2017). [WA2696258, Calliphlox amethystina (Boddaert, 1783)]. Wiki Aves - A Enciclopédia das Aves do Brasil.Disponível em: <http://www.wikiaves.com/2696258> Acesso em: 23 Mar 2020.	http://www.wikiaves.com/2696258
Calliphlox_amethystina	Callistemon citrinus	Legitimate	Male	yes	Luiz Bravo	2016-10-15	2016-10-21	Ribeirão Grande/SP	BRAVO (2016). [WA2331121, Calliphlox amethystina (Boddaert, 1783)]. Wiki Aves - A Enciclopédia das Aves do Brasil.Disponível em: <http://www.wikiaves.com/2331121> Acesso em: 23 Mar 2020.	http://www.wikiaves.com/2331121
Calliphlox_amethystina	Callistemon citrinus	Legitimate	Male	yes	Luiz Fernando Figueiredo	2014-09-07	2016-11-04	Ribeirão Grande/SP	FIGUEIREDO, L. F. (2014). [WA2352163, Calliphlox amethystina (Boddaert, 1783)]. Wiki Aves - A Enciclopédia das Aves do Brasil.Disponível em: <http://www.wikiaves.com/2352163> Acesso em: 23 Mar 2020.	http://www.wikiaves.com/2352163
Calliphlox_amethystina	Cestrum aurantiacum	Legitimate	Male	yes	Jefferson Otaviano	2016-09-04	2016-09-12	Ibiúna/SP	OTAVIANO, J. S. (2016). [WA2274544, Calliphlox amethystina (Boddaert, 1783)]. Wiki Aves - A Enciclopédia das Aves do Brasil.Disponível em: <http://www.wikiaves.com/2274544> Acesso em: 24 Mar 2020.	http://www.wikiaves.com/2274544
Calliphlox_amethystina	Asteraceae	Legitimate	Female	yes	Maurício Poletti	2018-08-22	2018-08-22	Catalão/GO	POLETTI, M. M. (2018). [WA3082180, Calliphlox amethystina (Boddaert, 1783)]. Wiki Aves - A Enciclopédia das Aves do Brasil.Disponível em: <http://www.wikiaves.com/3082180> Acesso em: 23 Mar 2020.	http://www.wikiaves.com/3082180
Calliphlox_amethystina	Grevillea banksii	Legitimate	Male	yes	Renan Betzel	2020-02-24	2020-02-26	Santa Teresa/ES	BETZEL, R. L. (2020). [WA3701289, Calliphlox amethystina (Boddaert, 1783)]. Wiki Aves - A Enciclopédia das Aves do Brasil.Disponível em: <http://www.wikiaves.com/3701289> Acesso em: 22 Mar 2020.	http://www.wikiaves.com/3701289
Calliphlox_amethystina	Grevillea banksii	Legitimate	Male	yes	Norica Iglesias	2019-01-14	2019-01-17	São Bento do Sapucaí/SP	IGLESIAS, N. H. (2019). [WA3250936, Calliphlox amethystina (Boddaert, 1783)]. Wiki Aves - A Enciclopédia das Aves do Brasil.Disponível em: <http://www.wikiaves.com/3250936> Acesso em: 22 Mar 2020.	http://www.wikiaves.com/3250936
Calliphlox_amethystina	Grevillea banksii	Legitimate	Female	yes	William Zaca 2	2018-08-23	2018-08-23	Atibaia/SP	ZACA, W. (2018). [WA3083141, Calliphlox amethystina (Boddaert, 1783)]. Wiki Aves - A Enciclopédia das Aves do Brasil.Disponível em: <http://www.wikiaves.com/3083141> Acesso em: 23 Mar 2020.	http://www.wikiaves.com/3083141
Calliphlox_amethystina	Grevillea banksii	Legitimate	Female	yes	Marcos Moura	2018-02-12	2018-02-13	Paraibuna/SP	MOURA, M. (2018). [WA2882763, Calliphlox amethystina (Boddaert, 1783)]. Wiki Aves - A Enciclopédia das Aves do Brasil.Disponível em: <http://www.wikiaves.com/2882763> Acesso em: 23 Mar 2020.	http://www.wikiaves.com/2882763
Calliphlox_amethystina	Grevillea banksii	Legitimate	Female	yes	Cristiane Stubing	2018-03-25	2018-03-25	Itatiba/SP	STUBING, C. M. (2018). [WA2922234, Calliphlox amethystina (Boddaert, 1783)]. Wiki Aves - A Enciclopédia das Aves do Brasil.Disponível em: <http://www.wikiaves.com/2922234> Acesso em: 23 Mar 2020.	http://www.wikiaves.com/2922234
Calliphlox_amethystina	Grevillea banksii	Legitimate	Female	yes	Tatiana Pongiluppi	2017-02-27	2017-12-15	Divino de São Lourenço/ES	PONGILUPPI, T. (2017). [WA2815983, Calliphlox amethystina (Boddaert, 1783)]. Wiki Aves - A Enciclopédia das Aves do Brasil.Disponível em: <http://www.wikiaves.com/2815983> Acesso em: 23 Mar 2020.	http://www.wikiaves.com/2815983
Calliphlox_amethystina	Grevillea banksii	Legitimate	Male	yes	Pedro Ávila Figueiredo	2016-12-05	2016-12-17	Poções/BA	FIGUEIREDO, P. L. (2016). [WA2402755, Calliphlox amethystina (Boddaert, 1783)]. Wiki Aves - A Enciclopédia das Aves do Brasil.Disponível em: <http://www.wikiaves.com/2402755> Acesso em: 23 Mar 2020.	http://www.wikiaves.com/2402755
Calliphlox_amethystina	Grevillea banksii	Legitimate	Male	yes	Antonia Carlini	2016-12-30	2016-12-30	Santa Teresa/ES	CARLINI, A. R. (2016). [WA2417490, Calliphlox amethystina (Boddaert, 1783)]. Wiki Aves - A Enciclopédia das Aves do Brasil.Disponível em: <http://www.wikiaves.com/2417490> Acesso em: 23 Mar 2020.	http://www.wikiaves.com/2417490
Calliphlox_amethystina	Grevillea banksii	Legitimate	Female	yes	Alfredo Heleno de Oliveira	2016-08-30	2016-09-10	Manhumirim/MG	OLIVEIRA, A. H. (2016). [WA2272132, Calliphlox amethystina (Boddaert, 1783)]. Wiki Aves - A Enciclopédia das Aves do Brasil.Disponível em: <http://www.wikiaves.com/2272132> Acesso em: 23 Mar 2020.	http://www.wikiaves.com/2272132
Calliphlox_amethystina	Holmskioldia sanguinea	Legitimate	Female	yes	Irina Kaufmann	2018-03-03	2018-03-06	Águas de Lindóia/SP	IRINA (2018). [WA2904481, Calliphlox amethystina (Boddaert, 1783)]. Wiki Aves - A Enciclopédia das Aves do Brasil.Disponível em: <http://www.wikiaves.com/2904481> Acesso em: 23 Mar 2020.	http://www.wikiaves.com/2904481
Calliphlox_amethystina	Inga	Legitimate	Female	Not determined	Jader Oslim Caetano	2020-01-18	2020-01-19	Benedito Novo/SC	CAETANO, J. (2020). [WA3651398, Calliphlox amethystina (Boddaert, 1783)]. Wiki Aves - A Enciclopédia das Aves do Brasil.Disponível em: <http://www.wikiaves.com/3651398> Acesso em: 22 Mar 2020.	http://www.wikiaves.com/3651398
Calliphlox_amethystina	Inga	Legitimate	Female	yes	Frederico Acaz Sonntag	2018-11-06	2018-11-07	Areia/PB	SONNTAG, F. A. (2018). [WA3172120, Calliphlox amethystina (Boddaert, 1783)]. Wiki Aves - A Enciclopédia das Aves do Brasil.Disponível em: <http://www.wikiaves.com/3172120> Acesso em: 22 Mar 2020.	http://www.wikiaves.com/3172120
Calliphlox_amethystina	Inga	Legitimate	Female	yes	Nailson Júnior	2018-11-05	2018-11-22	Areia/PB	JÚNIOR, N. A. (2018). [WA3189993, Calliphlox amethystina (Boddaert, 1783)]. Wiki Aves - A Enciclopédia das Aves do Brasil.Disponível em: <http://www.wikiaves.com/3189993> Acesso em: 22 Mar 2020.	http://www.wikiaves.com/3189993
Calliphlox_amethystina	Inga	Legitimate	Female	yes	Thiago Zanetti	2018-11-03	2018-11-03	Areia/PB	ZANETTI, T. (2018). [WA3166451, Calliphlox amethystina (Boddaert, 1783)]. Wiki Aves - A Enciclopédia das Aves do Brasil.Disponível em: <http://www.wikiaves.com/3166451> Acesso em: 22 Mar 2020.	http://www.wikiaves.com/3166451
Calliphlox_amethystina	Inga	Legitimate	Not determined	Not determined	Nilton Júnior	2017-11-26	2017-11-26	Rio de Janeiro/RJ	JÚNIOR, N. M. (2017). [WA2795511, Calliphlox amethystina (Boddaert, 1783)]. Wiki Aves - A Enciclopédia das Aves do Brasil.Disponível em: <http://www.wikiaves.com/2795511> Acesso em: 23 Mar 2020.	http://www.wikiaves.com/2795511
Calliphlox_amethystina	Inga	Legitimate	Female	yes	Augusto M. Santos	2016-11-15	2016-11-15	Salesópolis/SP	SANTOS, A. M. (2016). [WA2367646, Calliphlox amethystina (Boddaert, 1783)]. Wiki Aves - A Enciclopédia das Aves do Brasil.Disponível em: <http://www.wikiaves.com/2367646> Acesso em: 23 Mar 2020.	http://www.wikiaves.com/2367646
Calliphlox_amethystina	Lippia sp.	Legitimate	Female	yes	Ricardo R. Alves	2019-07-14	2019-07-16	Pirenópolis/GO	ALVES, R. R. (2019). [WA3419526, Calliphlox amethystina (Boddaert, 1783)]. Wiki Aves - A Enciclopédia das Aves do Brasil.Disponível em: <http://www.wikiaves.com/3419526> Acesso em: 22 Mar 2020.	http://www.wikiaves.com/3419526
Calliphlox_amethystina	Lippia sp.	Legitimate	Female	yes	Jivago Ferrer	2019-06-30	2019-10-06	Cocalzinho de Goiás/GO	FERRER, J. G. (2019). [WA3519005, Calliphlox amethystina (Boddaert, 1783)]. Wiki Aves - A Enciclopédia das Aves do Brasil.Disponível em: <http://www.wikiaves.com/3519005> Acesso em: 22 Mar 2020	http://www.wikiaves.com/3519005
Calliphlox_amethystina	Lantana camara	Legitimate	Female	yes	Sergio Thess	2019-07-28	2019-12-03	Petrópolis/RJ	THESS, S. P. (2019). [WA3595152, Calliphlox amethystina (Boddaert, 1783)]. Wiki Aves - A Enciclopédia das Aves do Brasil.Disponível em: <http://www.wikiaves.com/3595152> Acesso em: 22 Mar 2020.	http://www.wikiaves.com/3595152
Calliphlox_amethystina	Lantana camara	Legitimate	Male	yes	Gilberto Botelho	2019-09-11	2019-10-31	Itatiaia/RJ	BOTELHO, G. J. (2019). [WA3552977, Calliphlox amethystina (Boddaert, 1783)]. Wiki Aves - A Enciclopédia das Aves do Brasil.Disponível em: <http://www.wikiaves.com/3552977> Acesso em: 22 Mar 2020.	http://www.wikiaves.com/3552977
Calliphlox_amethystina	Lantana camara	Legitimate	Male	yes	Sergio Thess	2020-01-02	2020-03-02	Petrópolis/RJ	THESS, S. P. (2020). [WA3706530, Calliphlox amethystina (Boddaert, 1783)]. Wiki Aves - A Enciclopédia das Aves do Brasil.Disponível em: <http://www.wikiaves.com/3706530> Acesso em: 22 Mar 2020.	http://www.wikiaves.com/3706530
Calliphlox_amethystina	Lippia sp.	Legitimate	Male	yes	Luiz Motta	2019-06-22	2019-06-23	Cocalzinho de Goiás/GO	MOTTA, L. G. (2019). [WA3395878, Calliphlox amethystina (Boddaert, 1783)]. Wiki Aves - A Enciclopédia das Aves do Brasil.Disponível em: <http://www.wikiaves.com/3395878> Acesso em: 22 Mar 2020	http://www.wikiaves.com/3395878
Calliphlox_amethystina	Lantana camara	Legitimate	Not determined	Not determined	Matheus Souza	2019-03-05	2019-03-05	Ilhabela/SP	AVES, S. F. (2019). [WA3295565, Calliphlox amethystina (Boddaert, 1783)]. Wiki Aves - A Enciclopédia das Aves do Brasil.Disponível em: <http://www.wikiaves.com/3295565> Acesso em: 22 Mar 2020.	http://www.wikiaves.com/3295565
Calliphlox_amethystina	Lantana camara	Legitimate	Female	yes	Sergio ReOli	2019-04-06	2019-04-06	Itu/SP	OLIVEIRA, S. R. (2019). [WA3323007, Calliphlox amethystina (Boddaert, 1783)]. Wiki Aves - A Enciclopédia das Aves do Brasil.Disponível em: <http://www.wikiaves.com/3323007> Acesso em: 22 Mar 2020.	http://www.wikiaves.com/3323007
Calliphlox_amethystina	Lantana camara	Legitimate	Female	yes	Silvana Sfredo	2018-12-08	2018-12-11	Piranga/MG	SFREDO, S. A. (2018). [WA3209932, Calliphlox amethystina (Boddaert, 1783)]. Wiki Aves - A Enciclopédia das Aves do Brasil.Disponível em: <http://www.wikiaves.com/3209932> Acesso em: 22 Mar 2020.	http://www.wikiaves.com/3209932
Calliphlox_amethystina	Lantana camara	Legitimate	Female	yes	João B. Santos	2018-12-26	2018-12-26	Pelotas/RS	SANTOS, J. E. (2018). [WA3225567, Calliphlox amethystina (Boddaert, 1783)]. Wiki Aves - A Enciclopédia das Aves do Brasil.Disponível em: <http://www.wikiaves.com/3225567> Acesso em: 22 Mar 2020.	http://www.wikiaves.com/3225567
Calliphlox_amethystina	Lantana camara	Legitimate	Male	yes	Ingrid Sessegolo	2018-12-21	2018-12-27	Pelotas/RS	SESSEGOLO, I. (2018). [WA3226966, Calliphlox amethystina (Boddaert, 1783)]. Wiki Aves - A Enciclopédia das Aves do Brasil.Disponível em: <http://www.wikiaves.com/3226966> Acesso em: 22 Mar 2020.	http://www.wikiaves.com/3226966
Calliphlox_amethystina	Lantana camara	Legitimate	Female	yes	Estevão F. Santos	2018-09-07	2018-09-16	Cavalcante/GO	SANTOS, E. F. (2018). [WA3110850, Calliphlox amethystina (Boddaert, 1783)]. Wiki Aves - A Enciclopédia das Aves do Brasil.Disponível em: <http://www.wikiaves.com/3110850> Acesso em: 22 Mar 2020.	http://www.wikiaves.com/3110850
Calliphlox_amethystina	Lippia sp.	Legitimate	Female	yes	Ricardo R. Alves	2019-07-11	2019-07-16	Pirenópolis/GO	ALVES, R. R. (2019). [WA3420569, Calliphlox amethystina (Boddaert, 1783)]. Wiki Aves - A Enciclopédia das Aves do Brasil.Disponível em: <http://www.wikiaves.com/3420569> Acesso em: 23 Mar 2020.	http://www.wikiaves.com/3420569
Calliphlox_amethystina	Lippia sp.	Legitimate	Male	yes	Henrique Duarte	2018-06-23	2019-04-23	Cocalzinho de Goiás/GO	DUARTE, H. A. (2018). [WA3338944, Calliphlox amethystina (Boddaert, 1783)]. Wiki Aves - A Enciclopédia das Aves do Brasil.Disponível em: <http://www.wikiaves.com/3338944> Acesso em: 23 Mar 2020.	http://www.wikiaves.com/3338944
Calliphlox_amethystina	Lantana camara	Legitimate	Male	yes	Marco Costa	2018-08-19	2018-08-19	Santana de Parnaíba/SP	COSTA, M. V. (2018). [WA3078191, Calliphlox amethystina (Boddaert, 1783)]. Wiki Aves - A Enciclopédia das Aves do Brasil.Disponível em: <http://www.wikiaves.com/3078191> Acesso em: 23 Mar 2020.	http://www.wikiaves.com/3078191
Calliphlox_amethystina	Lantana camara	Legitimate	Male	yes	Nicodemos Rosa	2018-07-21	2018-07-21	Pitangui/MG	ROSA, N. A. (2018). [WA3042304, Calliphlox amethystina (Boddaert, 1783)]. Wiki Aves - A Enciclopédia das Aves do Brasil.Disponível em: <http://www.wikiaves.com/3042304> Acesso em: 23 Mar 2020.	http://www.wikiaves.com/3042304
Calliphlox_amethystina	Lantana camara	Legitimate	Female	yes	Fred Crema	2018-04-15	2018-05-02	Bofete/SP	LEIS, F. C. (2018). [WA2959177, Calliphlox amethystina (Boddaert, 1783)]. Wiki Aves - A Enciclopédia das Aves do Brasil.Disponível em: <http://www.wikiaves.com/2959177> Acesso em: 23 Mar 2020.	http://www.wikiaves.com/2959177
Calliphlox_amethystina	Lantana camara	Legitimate	Female	yes	Jonas Viel	2018-01-24	2018-01-25	Bento Gonçalves/RS	VIEL, J. P. (2018). [WA2860669, Calliphlox amethystina (Boddaert, 1783)]. Wiki Aves - A Enciclopédia das Aves do Brasil.Disponível em: <http://www.wikiaves.com/2860669> Acesso em: 23 Mar 2020.	http://www.wikiaves.com/2860669
Calliphlox_amethystina	Lantana camara	Legitimate	Male	yes	Alex Satsukawa	2017-10-05	2017-10-21	Itatiaia/RJ	SATSUKAWA, A. (2017). [WA2745527, Calliphlox amethystina (Boddaert, 1783)]. Wiki Aves - A Enciclopédia das Aves do Brasil.Disponível em: <http://www.wikiaves.com/2745527> Acesso em: 23 Mar 2020.	http://www.wikiaves.com/2745527
Calliphlox_amethystina	Lantana camara	Legitimate	Male	yes	Marcelo Figueiroa	2017-10-08	2017-10-12	Itatiaia/RJ	ANDRADE, L. M. (2017). [WA2732284, Calliphlox amethystina (Boddaert, 1783)]. Wiki Aves - A Enciclopédia das Aves do Brasil.Disponível em: <http://www.wikiaves.com/2732284> Acesso em: 23 Mar 2020.	http://www.wikiaves.com/2732284
Calliphlox_amethystina	Lantana camara	Legitimate	Female	yes	Antonio Gutierrez	2017-10-14	2017-10-16	Tapiraí/SP	GUTIERREZ, A. M. (2017). [WA2738291, Calliphlox amethystina (Boddaert, 1783)]. Wiki Aves - A Enciclopédia das Aves do Brasil.Disponível em: <http://www.wikiaves.com/2738291> Acesso em: 23 Mar 2020.	http://www.wikiaves.com/2738291
Calliphlox_amethystina	Lantana camara	Legitimate	Male	yes	Agnaldo Corrêa Assis	2017-09-10	2018-05-19	Nova Serrana/MG	ASSIS, A. C. (2017). [WA2977217, Calliphlox amethystina (Boddaert, 1783)]. Wiki Aves - A Enciclopédia das Aves do Brasil.Disponível em: <http://www.wikiaves.com/2977217> Acesso em: 23 Mar 2020.	http://www.wikiaves.com/2977217
Calliphlox_amethystina	Lantana camara	Legitimate	Female	yes	Rodrigo A. Quadros	2017-10-14	2017-10-16	Nova Friburgo/RJ	QUADROS, R. (2017). [WA2737624, Calliphlox amethystina (Boddaert, 1783)]. Wiki Aves - A Enciclopédia das Aves do Brasil.Disponível em: <http://www.wikiaves.com/2737624> Acesso em: 23 Mar 2020.	http://www.wikiaves.com/2737624
Calliphlox_amethystina	Lantana camara	Legitimate	Male	yes	Anna Nascimento	2017-02-10	2017-02-20	Turmalina/MG	NASCIMENTO, A. C. (2017). [WA2472790, Calliphlox amethystina (Boddaert, 1783)]. Wiki Aves - A Enciclopédia das Aves do Brasil.Disponível em: <http://www.wikiaves.com/2472790> Acesso em: 23 Mar 2020.	http://www.wikiaves.com/2472790
Calliphlox_amethystina	Lantana camara	Legitimate	Female	yes	Enio d´Avila	2017-01-07	2017-01-07	Petrópolis/RJ	D´AVILA, E. R. (2017). [WA2436791, Calliphlox amethystina (Boddaert, 1783)]. Wiki Aves - A Enciclopédia das Aves do Brasil.Disponível em: <http://www.wikiaves.com/2436791> Acesso em: 23 Mar 2020.	http://www.wikiaves.com/2436791
Calliphlox_amethystina	Lantana camara	Legitimate	Female	yes	Aurélio Rufo	2016-12-03	2016-12-12	Ilhabela/SP	RUFO, A. (2016). [WA2398124, Calliphlox amethystina (Boddaert, 1783)]. Wiki Aves - A Enciclopédia das Aves do Brasil.Disponível em: <http://www.wikiaves.com/2398124> Acesso em: 23 Mar 2020.	http://www.wikiaves.com/2398124
Calliphlox_amethystina	Lantana camara	Legitimate	Female	yes	JJ Stupka	2016-12-20	2016-12-20	Quitandinha/PR	STUPKA, J. (2016). [WA2406645, Calliphlox amethystina (Boddaert, 1783)]. Wiki Aves - A Enciclopédia das Aves do Brasil.Disponível em: <http://www.wikiaves.com/2406645> Acesso em: 23 Mar 2020.	http://www.wikiaves.com/2406645
Calliphlox_amethystina	Leonotis nepetifolia	Legitimate	Male	yes	Lorenzo Palma	2019-06-22	2020-01-01	Cocalzinho de Goiás/GO	PALMA, L. R. (2019). [WA3627040, Calliphlox amethystina (Boddaert, 1783)]. Wiki Aves - A Enciclopédia das Aves do Brasil.Disponível em: <http://www.wikiaves.com/3627040> Acesso em: 22 Mar 2020.	http://www.wikiaves.com/3627040
Calliphlox_amethystina	Leonotis nepetifolia	Legitimate	Female	yes	Sandra Beatriz Zarur	2019-06-22	2019-06-23	Cocalzinho de Goiás/GO	ZARUR, S. B. (2019). [WA3394769, Calliphlox amethystina (Boddaert, 1783)]. Wiki Aves - A Enciclopédia das Aves do Brasil.Disponível em: <http://www.wikiaves.com/3394769> Acesso em: 22 Mar 2020.	http://www.wikiaves.com/3394769
Calliphlox_amethystina	Leonotis nepetifolia	Legitimate	Male	yes	Luiz Motta	2019-06-22	2019-06-23	Cocalzinho de Goiás/GO	MOTTA, L. G. (2019). [WA3395836, Calliphlox amethystina (Boddaert, 1783)]. Wiki Aves - A Enciclopédia das Aves do Brasil.Disponível em: <http://www.wikiaves.com/3395836> Acesso em: 22 Mar 2020.	http://www.wikiaves.com/3395836
Calliphlox_amethystina	Leonotis nepetifolia	Legitimate	Male	yes	Rogério de Castro	2019-06-22	2019-06-26	Cocalzinho de Goiás/GO	CASTRO, R. (2019). [WA3397438, Calliphlox amethystina (Boddaert, 1783)]. Wiki Aves - A Enciclopédia das Aves do BrasilDisponível em: <http://www.wikiaves.com/3397438> Acesso em: 22 Mar 2020.	http://www.wikiaves.com/3397438
Calliphlox_amethystina	Leonotis nepetifolia	Legitimate	Male	yes	Catarina Tokatjian	2017-07-23	2018-08-02	Cocalzinho de Goiás/GO	TOKATJIAN, C. (2017). [WA3058006, Calliphlox amethystina (Boddaert, 1783)]. Wiki Aves - A Enciclopédia das Aves do Brasil.Disponível em: <http://www.wikiaves.com/3058006> Acesso em: 23 Mar 2020.	http://www.wikiaves.com/3058006
Calliphlox_amethystina	Leonotis nepetifolia	Legitimate	Male	yes	Rogério de Castro	2018-06-15	2018-06-19	Cocalzinho de Goiás/GO	CASTRO, R. (2018). [WA3006722, Calliphlox amethystina (Boddaert, 1783)]. Wiki Aves - A Enciclopédia das Aves do Brasil.Disponível em: <http://www.wikiaves.com/3006722> Acesso em: 23 Mar 2020.	http://www.wikiaves.com/3006722
Calliphlox_amethystina	Leonotis nepetifolia	Legitimate	Male	yes	Rogério de Castro	2017-07-08	2017-07-12	Cocalzinho de Goiás/GO	CASTRO, R. (2017). [WA2615447, Calliphlox amethystina (Boddaert, 1783)]. Wiki Aves - A Enciclopédia das Aves do Brasil.Disponível em: <http://www.wikiaves.com/2615447> Acesso em: 23 Mar 2020.	http://www.wikiaves.com/2615447
Calliphlox_amethystina	Leonotis nepetifolia	Legitimate	Male	yes	Marco Botelho	2017-07-22	2017-07-26	Cocalzinho de Goiás/GO	BOTELHO, M. A. (2017). [WA2635325, Calliphlox amethystina (Boddaert, 1783)]. Wiki Aves - A Enciclopédia das Aves do Brasil.Disponível em: <http://www.wikiaves.com/2635325> Acesso em: 23 Mar 2020.	http://www.wikiaves.com/2635325
Calliphlox_amethystina	Lychnophora sp.	Legitimate	Female	yes	Helberth Peixoto	2018-09-23	2019-01-02	Caeté/MG	PEIXOTO, H. J. (2018). [WA3233134, Calliphlox amethystina (Boddaert, 1783)]. Wiki Aves - A Enciclopédia das Aves do Brasil.Disponível em: <http://www.wikiaves.com/3233134> Acesso em: 23 Mar 2020.	http://www.wikiaves.com/3233134
Calliphlox_amethystina	Lychnophora sp.	Legitimate	Female	yes	Marcos Mourao	2018-09-23	2018-12-30	Santa Bárbara/MG	MOURAO, M. T. (2018). [WA3229368, Calliphlox amethystina (Boddaert, 1783)]. Wiki Aves - A Enciclopédia das Aves do Brasil.Disponível em: <http://www.wikiaves.com/3229368> Acesso em: 23 Mar 2020	http://www.wikiaves.com/3229368
Calliphlox_amethystina	Lychnophora sp.	Legitimate	Female	yes	Jarbas Mattos	2015-10-17	2019-06-13	Catas Altas/MG	MATTOS, J. P. (2015). [WA3384740, Calliphlox amethystina (Boddaert, 1783)]. Wiki Aves - A Enciclopédia das Aves do Brasil.Disponível em: <http://www.wikiaves.com/3384740> Acesso em: 23 Mar 2020.	http://www.wikiaves.com/3384740
Calliphlox_amethystina	Lychnophora sp.	Legitimate	Male	yes	Álvaro Fraga	2018-03-16	2018-03-31	Santana do Riacho/MG	FRAGA, A. R. (2018). [WA2927419, Calliphlox amethystina (Boddaert, 1783)]. Wiki Aves - A Enciclopédia das Aves do Brasil.Disponível em: <http://www.wikiaves.com/2927419> Acesso em: 23 Mar 2020.	http://www.wikiaves.com/2927419
Calliphlox_amethystina	Pentas lanceolata	Legitimate	Male	yes	Josiel Briet	2018-12-01	2019-02-11	São Luiz do Paraitinga/SP	BRIET, J. (2018). [WA3278355, Calliphlox amethystina (Boddaert, 1783)]. Wiki Aves - A Enciclopédia das Aves do Brasil.Disponível em: <http://www.wikiaves.com/3278355> Acesso em: 23 Mar 2020.	http://www.wikiaves.com/3278355
Calliphlox_amethystina	Prunus	Legitimate	Female	yes	André Mendes	2019-07-09	2019-07-10	Pedra Bela/SP	MENDES, A. (2019). [WA3414039, Calliphlox amethystina (Boddaert, 1783)]. Wiki Aves - A Enciclopédia das Aves do Brasil.Disponível em: <http://www.wikiaves.com/3414039> Acesso em: 22 Mar 2020.	http://www.wikiaves.com/3414039
Calliphlox_amethystina	Russelia equisetiformis	Legitimate	Female	yes	Rose Lopes Weiss	2018-03-29	2018-03-30	Campo Grande/MS	WEISS, R. L. (2018). [WA2925980, Calliphlox amethystina (Boddaert, 1783)]. Wiki Aves - A Enciclopédia das Aves do Brasil.Disponível em: <http://www.wikiaves.com/2925980> Acesso em: 23 Mar 2020.	http://www.wikiaves.com/2925980
Calliphlox_amethystina	Coleus barbatus	Legitimate	Female	yes	Paulo Roberto Raimundo	2019-09-17	2019-09-18	São Roque/SP	ROBERTO, P. (2019). [WA3495428, Calliphlox amethystina (Boddaert, 1783)]. Wiki Aves - A Enciclopédia das Aves do Brasil.Disponível em: <http://www.wikiaves.com/3495428> Acesso em: 23 Mar 2020.	http://www.wikiaves.com/3495428
Calliphlox_amethystina	Salvia	Legitimate	Female	yes	Paulo J. Silva	2016-11-19	2017-02-20	Domingos Martins/ES	SILVA, P. J. (2016). [WA2473104, Calliphlox amethystina (Boddaert, 1783)]. Wiki Aves - A Enciclopédia das Aves do Brasil.Disponível em: <http://www.wikiaves.com/2473104> Acesso em: 23 Mar 2020.	http://www.wikiaves.com/2473104
Calliphlox_amethystina	Tithonia rotundifolia	Legitimate	Male	yes	Lawrence Rabelo De Almeida	2017-05-30	2017-05-30	Lagoa Formosa/MG	ALMEIDA, L. R. (2017). [WA2573660, Calliphlox amethystina (Boddaert, 1783)]. Wiki Aves - A Enciclopédia das Aves do Brasil.Disponível em: <http://www.wikiaves.com/2573660> Acesso em: 23 Mar 2020.	http://www.wikiaves.com/2573660
Calliphlox_amethystina	Zinnia peruviana	Legitimate	Female	yes	Rone Carvalho	2020-01-03	2020-01-03	Virginópolis/MG	CARVALHO, R. F. (2020). [WA3629589, Calliphlox amethystina (Boddaert, 1783)]. Wiki Aves - A Enciclopédia das Aves do Brasil.Disponível em: <http://www.wikiaves.com/3629589> Acesso em: 22 Mar 2020.	http://www.wikiaves.com/3629589
Calliphlox_amethystina	Zinnia peruviana	Legitimate	Male	yes	Sonia Furtado	2018-01-10	2018-01-14	Lagoa dos Gatos/PE	FURTADO, S. M. (2018). [WA2846725, Calliphlox amethystina (Boddaert, 1783)]. Wiki Aves - A Enciclopédia das Aves do Brasil.Disponível em: <http://www.wikiaves.com/2846725> Acesso em: 23 Mar 2020.	http://www.wikiaves.com/2846725
Calliphlox_amethystina	Vochysia pruinosa	Legitimate	Male	yes	Wyllyan Alencar	2020-06-13	2020-07-01	Alto Paraíso de Goiás/GO	ALENCAR, W. R. (2020). [WA3859543, Calliphlox amethystina (Boddaert, 1783)]. Wiki Aves - A Enciclopédia das Aves do Brasil. Disponível em:	http://www.wikiaves.com/3859543
Calliphlox_amethystina	Lippia	Legitimate	Female	yes	Gláucio Freitas	2020-07-02	2020-07-03	Cocalzinho de Goiás/GO	SILVA, G. F. (2020). [WA3862814, Calliphlox amethystina (Boddaert, 1783)]. Wiki Aves - A Enciclopédia das Aves do Brasil. Disponível em:	http://www.wikiaves.com/3862814
Calliphlox_amethystina	Lippia	Legitimate	Female	yes	Rogério de Castro	2020-06-27	2020-07-05	Cocalzinho de Goiás/GO	CASTRO, R. (2020). [WA3865134, Calliphlox amethystina (Boddaert, 1783)]. Wiki Aves - A Enciclopédia das Aves do Brasil. Disponível em:	http://www.wikiaves.com/3865134
Calliphlox_amethystina	Lippia	Legitimate	Male	yes	Alessandro M. Moura	2020-07-16	2020-07-26	Cocalzinho de Goiás/GO	MOURA, A. M. (2020). [WA3895614, Calliphlox amethystina (Boddaert, 1783)]. Wiki Aves - A Enciclopédia das Aves do Brasil. Disponível em:	http://www.wikiaves.com/3895614
Calliphlox_amethystina	Lippia	Legitimate	Female	yes	Rogério de Castro	2020-06-27	2020-07-25	Cocalzinho de Goiás/GO	CASTRO, R. (2020). [WA3887361, Calliphlox amethystina (Boddaert, 1783)]. Wiki Aves - A Enciclopédia das Aves do Brasil. Disponível em:	http://www.wikiaves.com/3887361
Calliphlox_amethystina	Vernonanthura	Legitimate	Female	yes	Gabriela Pelosi	2020-08-01	2020-08-03	Itatiaia/RJ	PELOSI, G. (2020). [WA3907477, Calliphlox amethystina (Boddaert, 1783)]. Wiki Aves - A Enciclopédia das Aves do Brasil. Disponível em:	http://www.wikiaves.com/3907477
Calliphlox_amethystina	Inga	Legitimate	Female	yes	Adrian Eisen Rupp	2020-09-26	2020-09-27	Rio dos Cedros/SC	RUPP, A. E. (2020). [WA3990867, Calliphlox amethystina (Boddaert, 1783)]. Wiki Aves - A Enciclopédia das Aves do Brasil. Disponível em:	http://www.wikiaves.com/3990867
Calliphlox_amethystina	Duranta erecta	Legitimate	Male	yes	Sérgio Farrabrás	2020-10-04	2020-10-04	Mairiporã/SP	FARRABRÁS, S. (2020). [WA4003146, Calliphlox amethystina (Boddaert, 1783)]. Wiki Aves - A Enciclopédia das Aves do Brasil. Disponível em:	http://www.wikiaves.com/4003146
Calliphlox_amethystina	Zinnia	Legitimate	Female	yes	Thiago Zanetti	2020-10-03	2020-10-06	Lagoa dos Gatos/PE	ZANETTI, T. (2020). [WA4005628, Calliphlox amethystina (Boddaert, 1783)]. Wiki Aves - A Enciclopédia das Aves do Brasil. Disponível em:	http://www.wikiaves.com/4005628
Calliphlox_amethystina	Lantana camara	Legitimate	Male	No	Wagner Gomes Reis	2020-11-07	2020-11-08	Brasília/DF	REIS, W. G. (2020). [WA4064258, Calliphlox amethystina (Boddaert, 1783)]. Wiki Aves - A Enciclopédia das Aves do Brasil. Disponível em:	http://www.wikiaves.com/4064258
Calliphlox_amethystina	Lantana camara	Legitimate	Female	yes	Matias Gomes	2020-11-23	2020-11-23	Ilhabela/SP	GOMES, M. (2020). [WA4089079, Calliphlox amethystina (Boddaert, 1783)]. Wiki Aves - A Enciclopédia das Aves do Brasil. Disponível em:	http://www.wikiaves.com/4089079
Calliphlox_amethystina	Lantana camara	Legitimate	Female	yes	Sergio Tasca ( Sergio Estrada)	2020-12-24	2021-01-04	Socorro/SP	TASCA, S. D. (2020). [WA4149525, Calliphlox amethystina (Boddaert, 1783)]. Wiki Aves - A Enciclopédia das Aves do Brasil. Disponível em:	http://www.wikiaves.com/4149525
Calliphlox_amethystina	Lantana camara	Legitimate	Female	Not determined	Elaine Quirelli	2021-01-11	2021-01-11	Ibicoara/BA	QUIRELLI, E. (2021). [WA4159195, Calliphlox amethystina (Boddaert, 1783)]. Wiki Aves - A Enciclopédia das Aves do Brasil. Disponível em:	http://www.wikiaves.com/4159195
Calliphlox_amethystina	Lantana camara	Legitimate	Male	yes	Leonardo Russo Miranda	2021-01-31	2021-01-31	Santo Antônio do Grama/MG	MIRANDA, L. R. (2021). [WA4185096, Calliphlox amethystina (Boddaert, 1783)]. Wiki Aves - A Enciclopédia das Aves do Brasil. Disponível em:	http://www.wikiaves.com/4185096
Calliphlox_amethystina	Lantana camara	Legitimate	Male	yes	José Nélio Miranda	2021-03-17	2021-03-17	Pouso Alegre/MG	JOSENELIO (2021). [WA4238100, Calliphlox amethystina (Boddaert, 1783)]. Wiki Aves - A Enciclopédia das Aves do Brasil. Disponível em:	http://www.wikiaves.com/4238100
Calliphlox_amethystina	Lantana camara	Legitimate	Female	yes	Antonio Mello	2021-02-18	2021-02-19	Piedade/SP	MELLO, A. (2021). [WA4208378, Calliphlox amethystina (Boddaert, 1783)]. Wiki Aves - A Enciclopédia das Aves do Brasil. Disponível em:	http://www.wikiaves.com/4208378
Calliphlox_amethystina	Zinnia	Legitimate	Female	Not determined	Jaqueline_Rodrigues	2020-11-28	2020-11-30	Piedade/SP	RODRIGUES, J. (2020). [WA4098494, Calliphlox amethystina (Boddaert, 1783)]. Wiki Aves - A Enciclopédia das Aves do Brasil. Disponível em:	http://www.wikiaves.com/4098494
Calliphlox_amethystina	Fridericia speciosa	Legitimate	Male	yes	Rosa Letícia Pinto	2021-01-03	2021-01-05	Silveiras/SP	PINTO, R. L. (2021). [WA4150925, Calliphlox amethystina (Boddaert, 1783)]. Wiki Aves - A Enciclopédia das Aves do Brasil. Disponível em:	http://www.wikiaves.com/4150925
Calliphlox_amethystina	Grevillea banksii	Legitimate	Female	yes	Hamilton Moraes	2021-01-18	2021-01-21	Morro Redondo/RS	MORAES, H. L. (2021). [WA4172453, Calliphlox amethystina (Boddaert, 1783)]. Wiki Aves - A Enciclopédia das Aves do Brasil. Disponível em:	http://www.wikiaves.com/4172453
Calliphlox_amethystina	Grevillea banksii	Legitimate	Female	yes	Hamilton Moraes	2021-01-18	2021-01-21	Morro Redondo/RS	MORAES, H. L. (2021). [WA4172479, Calliphlox amethystina (Boddaert, 1783)]. Wiki Aves - A Enciclopédia das Aves do Brasil. Disponível em:	http://www.wikiaves.com/4172479
Calliphlox_amethystina	Grevillea banksii	Legitimate	Female	yes	Antonio Carlos Iglesias	2021-01-24	2021-01-25	São Bento do Sapucaí/SP	IGLESIAS, A. C. (2021). [WA4177412, Calliphlox amethystina (Boddaert, 1783)]. Wiki Aves - A Enciclopédia das Aves do Brasil. Disponível em:	http://www.wikiaves.com/4177412
Calliphlox_amethystina	Grevillea banksii	Legitimate	Female	yes	Antonio Carlos Iglesias	2021-01-24	2021-01-25	São Bento do Sapucaí/SP	IGLESIAS, A. C. (2021). [WA4177416, Calliphlox amethystina (Boddaert, 1783)]. Wiki Aves - A Enciclopédia das Aves do Brasil. Disponível em:	http://www.wikiaves.com/4177416
Calliphlox_amethystina	Lantana camara	Legitimate	Male	yes	José Nélio Miranda	2021-03-17	2021-03-19	Pouso Alegre/MG	JOSENELIO (2021). [WA4240308, Calliphlox amethystina (Boddaert, 1783)]. Wiki Aves - A Enciclopédia das Aves do Brasil. Disponível em:	http://www.wikiaves.com/4240308
Calliphlox_amethystina	Stachytarpheta	Legitimate	Female	yes	Jeferson Ambrósio Gonçalves	2021-02-11	2021-02-11	Itabira/MG	GONÇALVES, J. A. (2021). [WA4199202, Calliphlox amethystina (Boddaert, 1783)]. Wiki Aves - A Enciclopédia das Aves do Brasil. Disponível em:	http://www.wikiaves.com/4199202
Calliphlox_amethystina	Ceiba sp	Legitimate	Female	yes	Aldo J Nunes	2021-03-10	2021-03-10	Itu/SP	SANTO, A. J. (2021). [WA4229093, Calliphlox amethystina (Boddaert, 1783)]. Wiki Aves - A Enciclopédia das Aves do Brasil. Disponível em:	http://www.wikiaves.com/4229093
Calliphlox_amethystina	Lantana camara	Legitimate	Female	yes	João Sérgio Barros	2021-03-06	2021-03-08	Teresópolis/RJ	SOUZA, J. S. (2021). [WA4227477, Calliphlox amethystina (Boddaert, 1783)]. Wiki Aves - A Enciclopédia das Aves do Brasil. Disponível em:	http://www.wikiaves.com/4227477
Calliphlox_amethystina	Callistemon sp	Legitimate	Female	yes	Fred Crema	2021-02-03	2021-02-26	Lima Duarte/MG	LEIS, F. C. (2021). [WA4215857, Calliphlox amethystina (Boddaert, 1783)]. Wiki Aves - A Enciclopédia das Aves do Brasil. Disponível em:	http://www.wikiaves.com/4215857
Calliphlox_amethystina	Grevillea banksii	Legitimate	Female	yes	henri	2021-03-03	2021-03-10	Monte Alegre do Sul/SP	CORONFLY, H. C. (2021). [WA4229322, Calliphlox amethystina (Boddaert, 1783)]. Wiki Aves - A Enciclopédia das Aves do Brasil. Disponível em:	http://www.wikiaves.com/4229322
Calliphlox_amethystina	Russelia sp	Legitimate	Female	yes	Paulo Valadao	2021-03-20	2021-03-20	Campinas/SP	VALADAO, P. R. (2021). [WA4241641, Calliphlox amethystina (Boddaert, 1783)]. Wiki Aves - A Enciclopédia das Aves do Brasil. Disponível em:	http://www.wikiaves.com/4241641
Calliphlox_amethystina	Tithonia rotundifolia	Legitimate	Male	yes	Lawrence Rabelo De Almeida	2021-03-15	2021-03-26	Lagoa Formosa/MG	ALMEIDA, L. R. (2021). [WA4247775, Calliphlox amethystina (Boddaert, 1783)]. Wiki Aves - A Enciclopédia das Aves do Brasil. Disponível em:	http://www.wikiaves.com/4247775
Calliphlox_amethystina	Grevillea banksii	Legitimate	Female	yes	Alfredo Heleno de Oliveira	2021-02-10	2021-03-23	Manhumirim/MG	OLIVEIRA, A. H. (2021). [WA4245617, Calliphlox amethystina (Boddaert, 1783)]. Wiki Aves - A Enciclopédia das Aves do Brasil. Disponível em:	http://www.wikiaves.com/4245617
Calliphlox_amethystina	Lantana camara	Legitimate	Female	yes	Daniele Souza	2021-03-13	2021-03-26	Fortuna de Minas/MG	SOUZA, D. (2021). [WA4248166, Calliphlox amethystina (Boddaert, 1783)]. Wiki Aves - A Enciclopédia das Aves do Brasil. Disponível em:	http://www.wikiaves.com/4248166
Calliphlox_amethystina	Lantana camara	Legitimate	Female	yes	Gabriel Arroyo	2021-04-10	2021-04-10	Araraquara/SP	ARROYO, G. (2021). [WA4264956, Calliphlox amethystina (Boddaert, 1783)]. Wiki Aves - A Enciclopédia das Aves do Brasil. Disponível em:	http://www.wikiaves.com/4264956
Calliphlox_amethystina	Lantana camara	Legitimate	Female	yes	Gabriel Arroyo	2021-04-10	2021-04-10	Araraquara/SP	ARROYO, G. (2021). [WA4264954, Calliphlox amethystina (Boddaert, 1783)]. Wiki Aves - A Enciclopédia das Aves do Brasil. Disponível em:	http://www.wikiaves.com/4264954
Calliphlox_amethystina	Holmskioldia sanguinea	Legitimate	Male	yes	Paulo Valadao	2021-04-16	2021-04-16	Campinas/SP	VALADAO, P. R. (2021). [WA4271733, Calliphlox amethystina (Boddaert, 1783)]. Wiki Aves - A Enciclopédia das Aves do Brasil. Disponível em:	http://www.wikiaves.com/4271733
Calliphlox_amethystina	Tithonia rotundifolia	Legitimate	Male	yes	Lawrence Rabelo De Almeida	2021-04-21	2021-04-22	Lagoa Formosa/MG	ALMEIDA, L. R. (2021). [WA4279446, Calliphlox amethystina (Boddaert, 1783)]. Wiki Aves - A Enciclopédia das Aves do Brasil. Disponível em:	http://www.wikiaves.com/4279446
Calliphlox_amethystina	Lantana camara	Legitimate	Male	yes	Gladstone Gomes	2021-03-20	2021-04-22	Araxá/MG	GOMES, G. P. (2021). [WA4280103, Calliphlox amethystina (Boddaert, 1783)]. Wiki Aves - A Enciclopédia das Aves do Brasil. Disponível em:	http://www.wikiaves.com/4280103
Calliphlox_amethystina	Grevillea banksii	Legitimate	Male	yes	William Zaca II	2021-05-03	2021-05-04	Atibaia/SP	ZACA, W. (2021). [WA4295892, Calliphlox amethystina (Boddaert, 1783)]. Wiki Aves - A Enciclopédia das Aves do Brasil. Disponível em:	http://www.wikiaves.com/4295892
Calliphlox_amethystina	Caesalpinia pulcherrima	Theft	Female	yes	Constanza Rigollet Penchiari	2019-03-15	2019-07-03	Vinhedo/SP	PENCHIARI, C. R. (2019). [WA3406789, Calliphlox amethystina (Boddaert, 1783)]. Wiki Aves - A Enciclopédia das Aves do Brasil.Disponível em: <http://www.wikiaves.com/3406789> Acesso em: 22 Mar 2020.	http://www.wikiaves.com/3406789
Calliphlox_amethystina	Crocosmia aurea	Theft	Female	yes	harles Boufleur	2020-01-25	2020-02-08	Bom Retiro/SC	BOUFLEUR, C. (2020). [WA3676867, Calliphlox amethystina (Boddaert, 1783)]. Wiki Aves - A Enciclopédia das Aves do Brasil.Disponível em: <http://www.wikiaves.com/3676867> Acesso em: 22 Mar 2020.	http://www.wikiaves.com/3676867
Calliphlox_amethystina	Euphorbia pulcherrima	Theft	Female	yes	Kleber Silveira	2019-05-15	2019-05-16	Alfenas/MG	SILVEIRA, K. A. (2019). [WA3359662, Calliphlox amethystina (Boddaert, 1783)]. Wiki Aves - A Enciclopédia das Aves do Brasil.Disponível em: <http://www.wikiaves.com/3359662> Acesso em: 22 Mar 2020.	http://www.wikiaves.com/3359662
Calliphlox_amethystina	Hedychium coccineum	Theft	Female	yes	Ivan Rocha	2019-02-04	2019-02-04	Mafra/SC	ROCHA, I. (2019). [WA3271078, Calliphlox amethystina (Boddaert, 1783)]. Wiki Aves - A Enciclopédia das Aves do Brasil.Disponível em: <http://www.wikiaves.com/3271078> Acesso em: 23 Mar 2020.	http://www.wikiaves.com/3271078
Calliphlox_amethystina	Serjania	Theft	Female	yes	Manoel Freitas	2020-09-06	2020-09-06	Botumirim/MG	REIS, M. F. (2020). [WA3959156, Calliphlox amethystina (Boddaert, 1783)]. Wiki Aves - A Enciclopédia das Aves do Brasil. Disponível em:	http://www.wikiaves.com/3959156
Calliphlox_amethystina	Ceiba sp	Theft	Female	No	Paulo Queiroz	2021-04-03	2021-04-03	Itu/SP	QUEIROZ, P. (2021). [WA4256630, Calliphlox amethystina (Boddaert, 1783)]. Wiki Aves - A Enciclopédia das Aves do Brasil. Disponível em:	http://www.wikiaves.com/4256630
Calliphlox_amethystina	Duranta erecta	Theft	Female	yes	George Strozberg	2021-04-11	2021-04-12	Santo Antônio do Pinhal/SP	STROZBERG, G. (2021). [WA4268046, Calliphlox amethystina (Boddaert, 1783)]. Wiki Aves - A Enciclopédia das Aves do Brasil. Disponível em:	http://www.wikiaves.com/4268046
Campylopterus_largipennis	Erythrina speciosa	Legitimate	Not determined	Not determined	Ricardo Mendes	2010-08-29	2010-08-29	Catas Altas/MG	MENDES, R. L. (2010). [WA191338, Campylopterus largipennis (Boddaert, 1783)]. Wiki Aves - A Enciclopédia das Aves do Brasil.Disponível em: <http://www.wikiaves.com/191338> Acesso em: 10 Fev 2020.	http://www.wikiaves.com/191338
Campylopterus_largipennis	Erythrina speciosa	Legitimate	Not determined	yes	Daniel Esser	2010-08-29	2010-09-07	Catas Altas/MG	ESSER, D. T. (2010). [WA196477, Campylopterus largipennis (Boddaert, 1783)]. Wiki Aves - A Enciclopédia das Aves do Brasil.Disponível em: <http://www.wikiaves.com/196477> Acesso em: 10 Fev 2020.	http://www.wikiaves.com/196477
Campylopterus_largipennis	Grevillea banksii	Legitimate	Not determined	yes	Lucas Araújo-Silva	2013-12-12	2013-12-16	Santa Bárbara do Pará/PA	ARAÚJO-SILVA, L. E. (2013). [WA1186221, Campylopterus largipennis (Boddaert, 1783)]. Wiki Aves - A Enciclopédia das Aves do Brasil.Disponível em: <http://www.wikiaves.com/1186221> Acesso em: 10 Fev 2020.	http://www.wikiaves.com/1186221
Campylopterus_largipennis	Inga	Legitimate	Not determined	yes	Hiram Pereira	2016-04-20	2016-04-28	Oiapoque/AP	PEREIRA, H. A. (2016). [WA2099692, Campylopterus largipennis (Boddaert, 1783)]. Wiki Aves - A Enciclopédia das Aves do Brasil.Disponível em: <http://www.wikiaves.com/2099692> Acesso em: 10 Fev 2020.	http://www.wikiaves.com/2099692
Campylopterus_largipennis	Inga	Legitimate	Not determined	yes	Cárin Duarte	2018-09-28	2018-12-17	Parauapebas/PA	DUARTE, C. C. (2018). [WA3215509, Campylopterus largipennis (Boddaert, 1783)]. Wiki Aves - A Enciclopédia das Aves do Brasil.Disponível em: <http://www.wikiaves.com/3215509> Acesso em: 10 Fev 2020.	http://www.wikiaves.com/3215509
Campylopterus_largipennis	Isertia	Legitimate	Not determined	yes	Ciro Albano	2011-09-05	2011-09-10	Manaus/AM	ALBANO, C. (2011). [WA439213, Campylopterus largipennis (Boddaert, 1783)]. Wiki Aves - A Enciclopédia das Aves do Brasil.Disponível em: <http://www.wikiaves.com/439213> Acesso em: 10 Fev 2020.	http://www.wikiaves.com/439213
Campylopterus_largipennis	Isertia	Legitimate	Not determined	Not determined	Ingrid Macedo	2010-09-05	2010-09-21	Manaus/AM	MACEDO, I. T. (2010). [WA203529, Campylopterus largipennis (Boddaert, 1783)]. Wiki Aves - A Enciclopédia das Aves do Brasil.Disponível em: <http://www.wikiaves.com/203529> Acesso em: 10 Fev 2020.	http://www.wikiaves.com/203529
Campylopterus_largipennis	Isertia	Legitimate	Female	yes	Douglas Fernandes	2014-02-26	2014-02-27	Anapu/PA	FERNANDES, D. P. (2014). [WA1258209, Campylopterus largipennis (Boddaert, 1783)]. Wiki Aves - A Enciclopédia das Aves do Brasil.Disponível em: <http://www.wikiaves.com/1258209> Acesso em: 10 Fev 2020.	http://www.wikiaves.com/1258209
Campylopterus_largipennis	Norantea guianensis	Legitimate	Not determined	yes	Cleto Cavalcante	2014-09-26	2014-10-15	Ananindeua/PA	CAVALCANTE, C. S. (2014). [WA1482739, Campylopterus largipennis (Boddaert, 1783)]. Wiki Aves - A Enciclopédia das Aves do Brasil.Disponível em: <http://www.wikiaves.com/1482739> Acesso em: 10 Fev 2020.	http://www.wikiaves.com/1482739
Campylopterus_largipennis	Opuntia	Legitimate	Not determined	yes	Eduardo Bergo	2019-05-26	2019-07-01	Montes Claros/MG	BERGO, E. S. (2019). [WA3404915, Campylopterus largipennis (Boddaert, 1783)]. Wiki Aves - A Enciclopédia das Aves do Brasil.Disponível em: <http://www.wikiaves.com/3404915> Acesso em: 10 Fev 2020.	http://www.wikiaves.com/3404915
Campylopterus_largipennis	Aechmea bromeliifolia	Legitimate	Male	yes	Carolina S. Oliveira	2015-07-18	2015-07-18	Montes Claros/MG	OLIVEIRA, C. S. (2015). [WA1762439, Campylopterus largipennis (Boddaert, 1783)]. Wiki Aves - A Enciclopédia das Aves do Brasil.Disponível em: <http://www.wikiaves.com/1762439> Acesso em: 10 Fev 2020.	http://www.wikiaves.com/1762439
Campylopterus_largipennis	Spathodea campanulata	Legitimate	Not determined	yes	Luiz Ribenboim	2015-05-14	2015-12-29	Manaus/AM	RIBENBOIM, L. C. (2015). [WA1962870, Campylopterus largipennis (Boddaert, 1783)]. Wiki Aves - A Enciclopédia das Aves do Brasil.Disponível em: <http://www.wikiaves.com/1962870> Acesso em: 10 Fev 2020.	http://www.wikiaves.com/1962870
Campylopterus_largipennis	Handroanthus	Robber	Not determined	No	Eduardo Paschoalini	2019-09-01	2019-09-11	Parauapebas/PA	PASCHOALINI, E. L. (2019). [WA3487476, Campylopterus largipennis (Boddaert, 1783)]. Wiki Aves - A Enciclopédia das Aves do Brasil.Disponível em: <http://www.wikiaves.com/3487476> Acesso em: 10 Fev 2020.	http://www.wikiaves.com/3487476
Campylopterus_largipennis	Opuntia	Robber	Not determined	yes	Fernanda Fernandes - Fernandex	2018-02-21	2018-03-19	Montes Claros/MG	FERNANDES, F. (2018). [WA2916833, Campylopterus largipennis (Boddaert, 1783)]. Wiki Aves - A Enciclopédia das Aves do Brasil.Disponível em: <http://www.wikiaves.com/2916833> Acesso em: 10 Fev 2020.	http://www.wikiaves.com/2916833
Chionomesa_fimbriata	Aechmea	Legitimate	Male	yes	Wellinton de Souza	2019-07-07	2019-07-08	Guaraqueçaba/PR	SOUZA, W. (2019). [WA3411822, Amazilia fimbriata (Gmelin, 1788)]. Wiki Aves - A Enciclopédia das Aves do Brasil.Disponível em: <http://www.wikiaves.com/3411822> Acesso em: 25 Nov 2019.	http://www.wikiaves.com/3411822
Chionomesa_fimbriata	Antigonon Leptopus	Legitimate	Not determined	yes	Thamylles Alves	2019-09-01	2019-10-15	Pacujá/CE	ALVES, T. B. (2019). [WA3529955, Amazilia fimbriata (Gmelin, 1788)]. Wiki Aves - A Enciclopédia das Aves do Brasil. Disponível em: <http://www.wikiaves.com/3529955> Acesso em: 22 Nov 2019.	http://www.wikiaves.com/3529955
Chionomesa_fimbriata	Calliandra	Legitimate	Female	yes	Ricardo Mendes AndandopeloVale	2019-08-04	2019-08-04	Registro/SP	MENDES, R. (2019). [WA3443748, Amazilia fimbriata (Gmelin, 1788)]. Wiki Aves - A Enciclopédia das Aves do Brasil.Disponível em: <http://www.wikiaves.com/3443748> Acesso em: 22 Nov 2019.	http://www.wikiaves.com/3443748
Chionomesa_fimbriata	Erythrina velutina Willd.	Legitimate	Female	yes	Clenia Farias	2019-08-20	2019-08-21	Brasília/DF	FARIAS, C. L. (2019). [WA3462413, Amazilia fimbriata (Gmelin, 1788)]. Wiki Aves - A Enciclopédia das Aves do Brasil.Disponível em: <http://www.wikiaves.com/3462413> Acesso em: 22 Nov 2019.	http://www.wikiaves.com/3462413
Chionomesa_fimbriata	Grevillea banksii	Legitimate	Not determined	yes	Pedro Ávila Figueiredo	2019-09-17	2019-09-22	Itacaré/BA	FIGUEIREDO, P. L. (2019). [WA3499427, Amazilia fimbriata (Gmelin, 1788)]. Wiki Aves - A Enciclopédia das Aves do Brasil.Disponível em: <http://www.wikiaves.com/3499427> Acesso em: 22 Nov 2019.	http://www.wikiaves.com/3499427
Chionomesa_fimbriata	Handroanthus	Legitimate	Not determined	Not determined	Cassiana Aguiar	2019-09-03	2019-10-09	Florianópolis/SC	AGUIAR, C. A. (2019). [WA3522613, Amazilia fimbriata (Gmelin, 1788)]. Wiki Aves - A Enciclopédia das Aves do Brasil. Disponível em: <http://www.wikiaves.com/3522613> Acesso em: 22 Nov 2019.	http://www.wikiaves.com/3522613
Chionomesa_fimbriata	Ixora coccinea	Legitimate	Not determined	Not determined	Rogerio Barboza	2019-07-21	2019-07-28	Cuiabá/MT	BARBOZA, R. E. (2019). [WA3435577, Amazilia fimbriata (Gmelin, 1788)]. Wiki Aves - A Enciclopédia das Aves do Brasil.Disponível em: <http://www.wikiaves.com/3435577> Acesso em: 22 Nov 2019.	http://www.wikiaves.com/3435577
Chionomesa_fimbriata	Megaskepasma erythrochlamys	Legitimate	Not determined	Not determined	Jorge Matos DF	2019-07-24	2019-08-07	Divinópolis de Goiás/GO	MATOS, J. R. (2019). [WA3446852, Amazilia fimbriata (Gmelin, 1788)]. Wiki Aves - A Enciclopédia das Aves do Brasil.Disponível em: <http://www.wikiaves.com/3446852> Acesso em: 22 Nov 2019.	http://www.wikiaves.com/3446852
Chionomesa_fimbriata	Quesnelia quesneliana	Legitimate	Male	yes	Wellinton de Souza	2019-07-07	2019-07-08	Guaraqueçaba/PR	SOUZA, W. (2019). [WA3411822, Amazilia fimbriata (Gmelin, 1788)]. Wiki Aves - A Enciclopédia das Aves do Brasil.Disponível em: <http://www.wikiaves.com/3411822> Acesso em: 12 Jan 2020	http://www.wikiaves.com/3411822
Chionomesa_fimbriata	Sophora tomentosa	Legitimate	Not determined	yes	Sandro Paixão	2019-04-20	2019-04-20	Saquarema/RJ	PAIXÃO, S. V. (2019). [WA3335152, Amazilia fimbriata (Gmelin, 1788)]. Wiki Aves - A Enciclopédia das Aves do Brasil.Disponível em: <http://www.wikiaves.com/3335152> Acesso em: 12 Jan 2020.	http://www.wikiaves.com/3335152
Chionomesa_fimbriata	Sophora tomentosa	Legitimate	Not determined	yes	Juliana Paixão	2019-04-20	2019-04-20	Saquarema/RJ	PAIXÃO, J. J. (2019). [WA3335147, Amazilia fimbriata (Gmelin, 1788)]. Wiki Aves - A Enciclopédia das Aves do Brasil.Disponível em: <http://www.wikiaves.com/3335147> Acesso em: 12 Jan 2020.	http://www.wikiaves.com/3335147
Chionomesa_fimbriata	Zinnia peruviana	Legitimate	Not determined	Not determined	Luiz Gonzaga	2019-11-07	2019-11-12	Lagoa dos Gatos/PE	GONZAGA, L. (2019). [WA3567198, Amazilia fimbriata (Gmelin, 1788)]. Wiki Aves - A Enciclopédia das Aves do Brasil.Disponível em: <http://www.wikiaves.com/3567198> Acesso em: 18 Nov 2019.	http://www.wikiaves.com/3567198
Chionomesa_fimbriata	Moringa oleifera	Legitimate	Indeterminado	yes	Eduardo Paschoalini	2020-09-05	2021-02-05	Parauapebas/PA	PASCHOALINI, E. L. (2020). [WA4191598, Amazilia fimbriata (Gmelin, 1788)]. Wiki Aves - A Enciclopédia das Aves do Brasil. Disponível em:	http://www.wikiaves.com/4191598
Chionomesa_fimbriata	Odontonema sp	Legitimate	Indeterminado	Not determined	Rodrigo Subtil	2020-11-09	2021-02-01	Vila Velha/ES	SUBTIL, R. M. (2020). [WA4186735, Amazilia fimbriata (Gmelin, 1788)]. Wiki Aves - A Enciclopédia das Aves do Brasil. Disponível em:	http://www.wikiaves.com/4186735
Chionomesa_fimbriata	Pachystachys spicata	Legitimate	Indeterminado	yes	Carlos Durigan	2020-06-02	2021-01-28	Manaus/AM	DURIGAN, C. C. (2020). [WA4181987, Amazilia fimbriata (Gmelin, 1788)]. Wiki Aves - A Enciclopédia das Aves do Brasil.Disponível em:	http://www.wikiaves.com/4181987
Chionomesa_fimbriata	Grevillea banksii	Legitimate	Indeterminado	yes	Leandro Rios	2021-01-19	2021-01-19	Macaé/RJ	RIOS, L. O. (2021). [WA4170621, Amazilia fimbriata (Gmelin, 1788)]. Wiki Aves - A Enciclopédia das Aves do Brasil.Disponível em:	http://www.wikiaves.com/4170621
Chionomesa_fimbriata	Coutoubea	Legitimate	Indeterminado	Not determined	Marcio Huck	2021-01-10	2021-01-14	Caracaraí/RR	HUCK, M. H. (2021). [WA4163177, Amazilia fimbriata (Gmelin, 1788)]. Wiki Aves - A Enciclopédia das Aves do Brasil. Disponível em:	http://www.wikiaves.com/4163177
Chionomesa_fimbriata	Euphorbia tithymaloides	Legitimate	Indeterminado	yes	Daniel F. Nogueira	2020-12-11	2021-01-13	Viçosa do Ceará/CE	NOGUEIRA, D. F. (2020). [WA4161846, Amazilia fimbriata (Gmelin, 1788)]. Wiki Aves - A Enciclopédia das Aves do Brasil. Disponível em:	http://www.wikiaves.com/4161846
Chionomesa_fimbriata	Ixora	Legitimate	Indeterminado	yes	Ricardo Danilo A. Filho	2020-12-25	2020-12-28	Cachoeiro de Itapemirim/ES	FILHO, R. D. (2020). [WA4138068, Amazilia fimbriata (Gmelin, 1788)]. Wiki Aves - A Enciclopédia das Aves do Brasil. Disponível em:	http://www.wikiaves.com/4138068
Chionomesa_fimbriata	Ixora	Legitimate	Indeterminado	yes	Ricardo Danilo A. Filho	2020-12-25	2020-12-28	Cachoeiro de Itapemirim/ES	FILHO, R. D. (2020). [WA4138069, Amazilia fimbriata (Gmelin, 1788)]. Wiki Aves - A Enciclopédia das Aves do Brasil. Disponível em:	http://www.wikiaves.com/4138069
Chionomesa_fimbriata	Odontonema sp	Legitimate	Indeterminado	yes	Pr. Messias Rodrigues	2020-11-04	2020-11-18	Tianguá/CE	RODRIGUES, M. M. (2020). [WA4080193, Amazilia fimbriata (Gmelin, 1788)]. Wiki Aves - A Enciclopédia das Aves do Brasil. Disponível em:	http://www.wikiaves.com/4080193
Chionomesa_fimbriata	Erythrina speciosa	Legitimate	Indeterminado	yes	Martinho Rau	2020-08-09	2020-10-12	Witmarsum/SC	RAU, M. (2020). [WA4013825, Amazilia fimbriata (Gmelin, 1788)]. Wiki Aves - A Enciclopédia das Aves do Brasil. Disponível em:	http://www.wikiaves.com/4013825
Chionomesa_fimbriata	Helicteres	Legitimate	Male	yes	Andre Siade	2020-09-30	2020-10-10	Santo Antônio do Descoberto/GO	SIADE, A. (2020). [WA4011852, Amazilia fimbriata (Gmelin, 1788)]. Wiki Aves - A Enciclopédia das Aves do Brasil. Disponível em:	http://www.wikiaves.com/4011852
Chionomesa_fimbriata	Anacardium ocidentale	Legitimate	Male	yes	Nicky Czaban	2020-09-29	2020-09-30	Manaus/AM	CZABAN, N. (2020). [WA3996691, Amazilia fimbriata (Gmelin, 1788)]. Wiki Aves - A Enciclopédia das Aves do Brasil. Disponível em:	http://www.wikiaves.com/3996691
Chionomesa_fimbriata	Anacardium ocidentale	Legitimate	Male	yes	Nicky Czaban	2020-09-29	2020-09-30	Manaus/AM	CZABAN, N. (2020). [WA3996694, Amazilia fimbriata (Gmelin, 1788)]. Wiki Aves - A Enciclopédia das Aves do Brasil. Disponível em:	http://www.wikiaves.com/3996694
Chionomesa_fimbriata	Lantana camara	Legitimate	Indeterminado	Not determined	Marcio Muniz de Farias	2020-10-28	2021-02-22	Brasília/DF	FARIAS, M. M. (2020). [WA4211849, Amazilia fimbriata (Gmelin, 1788)]. Wiki Aves - A Enciclopédia das Aves do Brasil. Disponível em:	http://www.wikiaves.com/4211849
Chionomesa_fimbriata	Clerodendrum x speciosum	Legitimate	Indeterminado	Not determined	Márcio L. Souza	2021-04-04	2021-04-06	São José/SC	SOUZA, M. L. (2021). [WA4261275, Amazilia fimbriata (Gmelin, 1788)]. Wiki Aves - A Enciclopédia das Aves do Brasil. Disponível em:	http://www.wikiaves.com/4261275
Chionomesa_fimbriata	Zinnia	Legitimate	Indeterminado	yes	Pedro Callado	2021-03-27	2021-03-27	Pedras de Fogo/PB	CALLADO, P. (2021). [WA4249277, Amazilia fimbriata (Gmelin, 1788)]. Wiki Aves - A Enciclopédia das Aves do Brasil. Disponível em:	http://www.wikiaves.com/4249277
Chionomesa_fimbriata	Zinnia	Legitimate	Indeterminado	No	Thomaz Callado	2021-03-27	2021-03-27	Pedras de Fogo/PB	CALLADO, T. C. (2021). [WA4249263, Amazilia fimbriata (Gmelin, 1788)]. Wiki Aves - A Enciclopédia das Aves do Brasil. Disponível em:	http://www.wikiaves.com/4249263
Chionomesa_fimbriata	Clerodendrum thomsoniae	Legitimate	Indeterminado	yes	Nailson Júnior	2021-02-23	2021-02-28	Caxias/MA	JÚNIOR, N. A. (2021). [WA4219033, Amazilia fimbriata (Gmelin, 1788)]. Wiki Aves - A Enciclopédia das Aves do Brasil. Disponível em:	http://www.wikiaves.com/4219033
Chionomesa_fimbriata	Clerodendrum x speciosum	Legitimate	Indeterminado	Not determined	Márcio L. Souza	2021-04-08	2021-04-11	São José/SC	SOUZA, M. L. (2021). [WA4266799, Amazilia fimbriata (Gmelin, 1788)]. Wiki Aves - A Enciclopédia das Aves do Brasil. Disponível em:	http://www.wikiaves.com/4266799
Chionomesa_fimbriata	Zinnia	Legitimate	Indeterminado	yes	Isac Menezes	2021-03-11	2021-03-23	São Bernardo/MA	MENEZES, I. (2021). [WA4245202, Amazilia fimbriata (Gmelin, 1788)]. Wiki Aves - A Enciclopédia das Aves do Brasil. Disponível em:	http://www.wikiaves.com/4245202
Chionomesa_fimbriata	Hibiscus	Legitimate	Indeterminado	yes	Frederico Pereira	2020-05-26	2021-03-20	Conceição da Barra/ES	ANDRADE, F. P. (2020). [WA4113402, Amazilia fimbriata (Gmelin, 1788)]. Wiki Aves - A Enciclopédia das Aves do Brasil. Disponível em:	http://www.wikiaves.com/4113402
Chionomesa_fimbriata	Carica papaya	Legitimate	Indeterminado	yes	Amablly Moura	2021-02-26	2021-03-05	Guaramiranga/CE	MOURA, A. R. (2021). [WA4224003, Amazilia fimbriata (Gmelin, 1788)]. Wiki Aves - A Enciclopédia das Aves do Brasil. Disponível em:	http://www.wikiaves.com/4224003
Chionomesa_fimbriata	Neoregelia eleutheropetala	Legitimate	Indeterminado	yes	Layon O. Demarchi	2020-12-11	2021-02-09	Manaus/AM	DEMARCHI, L. O. (2020). [WA4197182, Amazilia fimbriata (Gmelin, 1788)]. Wiki Aves - A Enciclopédia das Aves do Brasil. Disponível em:	http://www.wikiaves.com/4197182
Chionomesa_fimbriata	Bromeliaceae	Legitimate	Indeterminado	yes	Dimas Filho	2021-02-13	2021-02-13	Surubim/PE	FILHO, D. C. (2021). [WA4200800, Amazilia fimbriata (Gmelin, 1788)]. Wiki Aves - A Enciclopédia das Aves do Brasil. Disponível em:	http://www.wikiaves.com/4200800
Chionomesa_fimbriata	Malvaviscus arboreus	Legitimate	Indeterminado	Not determined	Marcelo M. Dias	2020-07-01	2020-07-06	Florianópolis/SC	DIAS, M. M. (2020). [WA3866397, Amazilia fimbriata (Gmelin, 1788)]. Wiki Aves - A Enciclopédia das Aves do Brasil. Disponível em:	http://www.wikiaves.com/3866397
Chionomesa_fimbriata	Odontonema sp	Legitimate	Indeterminado	Not determined	Marcelo M. Dias	2020-06-15	2020-06-15	Florianópolis/SC	DIAS, M. M. (2020). [WA3839101, Amazilia fimbriata (Gmelin, 1788)]. Wiki Aves - A Enciclopédia das Aves do Brasil. Disponível em:	http://www.wikiaves.com/3839101
Chionomesa_fimbriata	Carica papaya	Legitimate	Indeterminado	yes	Valdir Araujo	2020-07-29	2020-08-19	Carbonita/MG	ARAUJO, V. (2020). [WA3931450, Amazilia fimbriata (Gmelin, 1788)]. Wiki Aves - A Enciclopédia das Aves do Brasil. Disponível em:	http://www.wikiaves.com/3931450
Chionomesa_fimbriata	Antonia ovata	Legitimate	Male	yes	Manoel Freitas	2020-07-31	2020-08-06	Botumirim/MG	REIS, M. F. (2020). [WA3913096, Amazilia fimbriata (Gmelin, 1788)]. Wiki Aves - A Enciclopédia das Aves do Brasil. Disponível em:	http://www.wikiaves.com/3913096
Chionomesa_fimbriata	Bromeliaceae	Legitimate	Indeterminado	yes	Ana Guztzazky	2020-05-13	2020-05-17	Salete/SC	GUZTZAZKY, A. C. (2020). [WA3801076, Amazilia fimbriata (Gmelin, 1788)]. Wiki Aves - A Enciclopédia das Aves do Brasil. Disponível em:	http://www.wikiaves.com/3801076
Chionomesa_fimbriata	Cenostigma	Legitimate	Female	yes	Thiago Zanetti	2020-06-03	2020-06-03	Areia/PB	ZANETTI, T. (2020). [WA3823602, Amazilia fimbriata (Gmelin, 1788)]. Wiki Aves - A Enciclopédia das Aves do Brasil. Disponível em:	http://www.wikiaves.com/3823602
Chionomesa_fimbriata	Clerodendrum thomsoniae	Legitimate	Female	yes	Kennedy Borges-Road	2020-05-13	2020-06-08	Aruanã/GO	BORGES, K. A. (2020). [WA3829510, Amazilia fimbriata (Gmelin, 1788)]. Wiki Aves - A Enciclopédia das Aves do Brasil. Disponível em:	http://www.wikiaves.com/3829510
Chionomesa_fimbriata	Erythrina speciosa	Legitimate	Indeterminado	yes	Bruno Neri Guia BirdWatching	2020-07-18	2020-07-19	Peruíbe/SP	BRUNONERI (2020). [WA3883389, Amazilia fimbriata (Gmelin, 1788)]. Wiki Aves - A Enciclopédia das Aves do Brasil. Disponível em:	http://www.wikiaves.com/3883389
Chionomesa_fimbriata	Alpinia zerumbet	Legitimate	Indeterminado	yes	Oscar Brito	2020-07-07	2020-07-19	Alhandra/PB	BRITO, O. H. (2020). [WA3884268, Amazilia fimbriata (Gmelin, 1788)]. Wiki Aves - A Enciclopédia das Aves do Brasil. Disponível em:	http://www.wikiaves.com/3884268
Chionomesa_fimbriata	Erythrina speciosa	Legitimate	Female	yes	Pedro Behne	2020-07-21	2020-07-21	Peruíbe/SP	BEHNE, P. B. (2020). [WA3887854, Amazilia fimbriata (Gmelin, 1788)]. Wiki Aves - A Enciclopédia das Aves do Brasil. Disponível em:	http://www.wikiaves.com/3887854
Chionomesa_fimbriata	Aloe	Legitimate	Indeterminado	yes	Annelise Sgarioni	2020-07-17	2020-07-23	Torres/RS	SGARIONI, A. Z. (2020). [WA3889634, Amazilia fimbriata (Gmelin, 1788)]. Wiki Aves - A Enciclopédia das Aves do Brasil. Disponível em:	http://www.wikiaves.com/3889634
Chionomesa_fimbriata	Aloe	Legitimate	Indeterminado	yes	Annelise Sgarioni	2020-07-17	2020-07-23	Torres/RS	SGARIONI, A. Z. (2020). [WA3889635, Amazilia fimbriata (Gmelin, 1788)]. Wiki Aves - A Enciclopédia das Aves do Brasil. Disponível em:	http://www.wikiaves.com/3889635
Chionomesa_fimbriata	Pachystachys spicata	Legitimate	Female	yes	João Victor Pollig	2020-08-02	2020-08-08	Rio de Janeiro/RJ	POLLIG, J. V. (2020). [WA3963472, Amazilia fimbriata (Gmelin, 1788)]. Wiki Aves - A Enciclopédia das Aves do Brasil. Disponível em:	http://www.wikiaves.com/3963472
Chionomesa_fimbriata	Erythrina velutina Willd.	Theft	Not determined	Not determined	Rafael Oliveira Melatti	2019-08-10	2019-08-15	Brasília/DF	MELATTI, R. O. (2019). [WA3455507, Amazilia fimbriata (Gmelin, 1788)]. Wiki Aves - A Enciclopédia das Aves do Brasil.Disponível em: <http://www.wikiaves.com/3455507> Acesso em: 22 Nov 2019.	http://www.wikiaves.com/3455507
Chionomesa_fimbriata	Spathodea campanulata	Theft	Indeterminado	Not determined	Luiz Gonzaga	2021-05-01	2021-05-03	Areia/PB	GONZAGA, L. (2021). [WA4293712, Amazilia fimbriata (Gmelin, 1788)]. Wiki Aves - A Enciclopédia das Aves do Brasil. Disponível em:	http://www.wikiaves.com/4293712
Chionomesa_fimbriata	Helicteres	Theft	Indeterminado	Not determined	Robison Silva	2020-10-04	2020-12-13	Brasília/DF	RHAVES (2020). [WA4117950, Amazilia fimbriata (Gmelin, 1788)]. Wiki Aves - A Enciclopédia das Aves do Brasil. Disponível em:	http://www.wikiaves.com/4117950
Chionomesa_fimbriata	Qualea multiflora	Theft	Indeterminado	Not determined	Mayangdi Inzaulgarat	2020-12-18	2020-12-18	Brasília/DF	SUÁREZ, M. I. (2020). [WA4123947, Amazilia fimbriata (Gmelin, 1788)]. Wiki Aves - A Enciclopédia das Aves do Brasil. Disponível em:	http://www.wikiaves.com/4123947
Chionomesa_fimbriata	Heliconia bihai	Theft	Indeterminado	yes	Felipe Sussekind	2020-09-24	2020-09-29	Rio de Janeiro/RJ	SUSSEKIND, F. (2020). [WA3996218, Amazilia fimbriata (Gmelin, 1788)]. Wiki Aves - A Enciclopédia das Aves do Brasil. Disponível em:	http://www.wikiaves.com/3996218
Chionomesa_fimbriata	Mabea fistulifera	Theft	Indeterminado	yes	Renan Oliveira	2020-06-24	2021-03-08	Viçosa/MG	OLIVEIRA, R. C. (2020). [WA4226817, Amazilia fimbriata (Gmelin, 1788)]. Wiki Aves - A Enciclopédia das Aves do Brasil. Disponível em:	http://www.wikiaves.com/4226817
Chionomesa_fimbriata	Ixora	Theft	Indeterminado	yes	Guilherme B. Pereira	2021-02-04	2021-03-06	São Francisco/MG	PEREIRA, G. B. (2021). [WA4225301, Amazilia fimbriata (Gmelin, 1788)]. Wiki Aves - A Enciclopédia das Aves do Brasil. Disponível em:	http://www.wikiaves.com/4225301
Chionomesa_fimbriata	Bowdichia virgilioides	Theft	Indeterminado	yes	Jailson Teixeira	2020-12-06	2021-02-20	Garanhuns/PE	TEIXEIRA, J. (2020). [WA4210264, Amazilia fimbriata (Gmelin, 1788)]. Wiki Aves - A Enciclopédia das Aves do Brasil. Disponível em:	http://www.wikiaves.com/4210264
Chionomesa_fimbriata	Clerodendrum x speciosum	Theft	Indeterminado	yes	Otávio Pereira	2020-06-27	2020-06-27	Buriticupu/MA	PEREIRA, O. D. (2020). [WA3854701, Amazilia fimbriata (Gmelin, 1788)]. Wiki Aves - A Enciclopédia das Aves do Brasil. Disponível em:	http://www.wikiaves.com/3854701
Chionomesa_fimbriata	Hibiscus sp	Theft	Indeterminado	yes	Jerônimo Filho	2020-08-29	2020-09-01	Garopaba/SC	FILHO, J. P. (2020). [WA3951454, Amazilia fimbriata (Gmelin, 1788)]. Wiki Aves - A Enciclopédia das Aves do Brasil. Disponível em:	http://www.wikiaves.com/3951454
Chionomesa_fimbriata	Inga	Theft	Indeterminado	Not determined	Claudio Martins	2020-08-27	2020-08-27	Rio de Janeiro/RJ	SOUZA, C. M. (2020). [WA3944271, Amazilia fimbriata (Gmelin, 1788)]. Wiki Aves - A Enciclopédia das Aves do Brasil. Disponível em:	http://www.wikiaves.com/3944271
Chionomesa_fimbriata	Handroanthus	Theft	Indeterminado	Not determined	Isadora Machado	2020-08-23	2020-09-08	Brasília/DF	MACHADO, I. O. (2020). [WA3963806, Amazilia fimbriata (Gmelin, 1788)]. Wiki Aves - A Enciclopédia das Aves do Brasil. Disponível em:	http://www.wikiaves.com/3963806
Chionomesa_fimbriata	Malvaviscus arboreus	Robber	Indeterminado	Not determined	Heliomar 75934	2020-05-09	2020-06-09	Angra dos Reis/RJ	OLIVEIRA, H. D. (2020). [WA3831792, Amazilia fimbriata (Gmelin, 1788)]. Wiki Aves - A Enciclopédia das Aves do Brasil. Disponível em:	http://www.wikiaves.com/3831792
Chionomesa_fimbriata	Periandra	Robber	Female	yes	Tiago Elis	2020-08-01	2020-08-01	Espírito Santo/RN	SILVA, T. F. (2020). [WA3904038, Amazilia fimbriata (Gmelin, 1788)]. Wiki Aves - A Enciclopédia das Aves do Brasil. Disponível em:	http://www.wikiaves.com/3904038
Chionomesa_fimbriata	Bignoniaceae	Robber	Female	yes	Sara Silva	2020-08-24	2020-09-07	Altos/PI	SILVA, S. R. (2020). [WA3960419, Amazilia fimbriata (Gmelin, 1788)]. Wiki Aves - A Enciclopédia das Aves do Brasil. Disponível em:	http://www.wikiaves.com/3960419
Chionomesa_lactea	Callistemon citrinus	Legitimate	Not determined	yes	Matheus Henrique	2019-05-18	2019-05-18	São Sebastião do Paraíso/MG	REIS, M. H. (2019). [WA3361120, Amazilia lactea (Lesson, 1832)]. Wiki Aves - A Enciclopédia das Aves do Brasil.Disponível em: <http://www.wikiaves.com/3361120> Acesso em: 15 Jan 2020.	http://www.wikiaves.com/3361120
Chionomesa_lactea	Clerodendrum x speciosum	Legitimate	Not determined	yes	Cleverson Felix	2019-10-27	2019-10-28	Belo Horizonte/MG	FELIX, C. F. (2019). [WA3550007, Amazilia lactea (Lesson, 1832)]. Wiki Aves - A Enciclopédia das Aves do Brasil.Disponível em: <http://www.wikiaves.com/3550007> Acesso em: 13 Jan 2020.	http://www.wikiaves.com/3550007
Chionomesa_lactea	Fuchsia	Legitimate	Not determined	yes	Antonio Carlos Iglesias	2019-11-20	2019-11-21	São Bento do Sapucaí/SP	IGLESIAS, A. C. (2019). [WA3579700, Amazilia lactea (Lesson, 1832)]. Wiki Aves - A Enciclopédia das Aves do Brasil.Disponível em: <http://www.wikiaves.com/3579700> Acesso em: 13 Jan 2020.	http://www.wikiaves.com/3579700
Chionomesa_lactea	Grevillea banksii	Legitimate	Not determined	Not determined	Theodoro Prado	2011-06-21	2020-01-05	Itupeva/SP	PRADO, T. A. (2011). [WA3632089, Amazilia lactea (Lesson, 1832)]. Wiki Aves - A Enciclopédia das Aves do Brasil.Disponível em: <http://www.wikiaves.com/3632089> Acesso em: 13 Jan 2020.	http://www.wikiaves.com/3632089
Chionomesa_lactea	Heliconia rostrata	Legitimate	Not determined	yes	Igino Rotta	2016-12-02	2019-04-23	Tatuí/SP	ROTTA, I. (2016). [WA3338243, Amazilia lactea (Lesson, 1832)]. Wiki Aves - A Enciclopédia das Aves do Brasil.Disponível em: <http://www.wikiaves.com/3338243> Acesso em: 15 Jan 2020.	http://www.wikiaves.com/3338243
Chionomesa_lactea	Inga	Legitimate	Not determined	Not determined	Carlos Vieira.	2019-10-12	2019-10-14	Piraí/RJ	VIEIRA, C. (2019). [WA3528366, Amazilia lactea (Lesson, 1832)]. Wiki Aves - A Enciclopédia das Aves do Brasil.Disponível em: <http://www.wikiaves.com/3528366> Acesso em: 13 Jan 2020.	http://www.wikiaves.com/3528366
Chionomesa_lactea	Lantana camara	Legitimate	Not determined	yes	Wyllyan Alencar	2019-09-17	2019-10-22	Rio Branco/AC	ALENCAR, W. R. (2019). [WA3539858, Amazilia lactea (Lesson, 1832)]. Wiki Aves - A Enciclopédia das Aves do Brasil.Disponível em: <http://www.wikiaves.com/3539858> Acesso em: 13 Jan 2020.	http://www.wikiaves.com/3539858
Chionomesa_lactea	Leonotis nepetifolia	Legitimate	Not determined	yes	Kleuber Carregosa	2019-07-28	2019-07-29	Almenara/MG	CARREGOSA, K. B. (2019). [WA3435670, Amazilia lactea (Lesson, 1832)]. Wiki Aves - A Enciclopédia das Aves do Brasil.Disponível em: <http://www.wikiaves.com/3435670> Acesso em: 14 Jan 2020.	http://www.wikiaves.com/3435670
Chionomesa_lactea	Leonotis nepetifolia	Legitimate	Not determined	yes	Kleber Silveira	2019-06-25	2019-11-15	Alfenas/MG	SILVEIRA, K. A. (2019). [WA3571932, Amazilia lactea (Lesson, 1832)]. Wiki Aves - A Enciclopédia das Aves do Brasil.Disponível em: <http://www.wikiaves.com/3571932> Acesso em: 13 Jan 2020.	http://www.wikiaves.com/3571932
Chionomesa_lactea	Zinnia peruviana	Legitimate	Not determined	yes	Rone Carvalho	2019-12-23	2020-01-01	Virginópolis/MG	CARVALHO, R. F. (2019). [WA3626765, Amazilia lactea (Lesson, 1832)]. Wiki Aves - A Enciclopédia das Aves do Brasil.Disponível em: <http://www.wikiaves.com/3626765> Acesso em: 13 Jan 2020.	http://www.wikiaves.com/3626765
Chionomesa_lactea	Tithonia rotundifolia	Legitimate	Not determined	yes	Lawrence Rabelo De Almeida	2019-04-23	2019-04-25	Lagoa Formosa/MG	ALMEIDA, L. R. (2019). [WA3340315, Amazilia lactea (Lesson, 1832)]. Wiki Aves - A Enciclopédia das Aves do Brasil.Disponível em: <http://www.wikiaves.com/3340315> Acesso em: 17 Jan 2020.	http://www.wikiaves.com/3340315
Chionomesa_lactea	Holmskioldia	Legitimate	Indeterminado	yes	Paulo Valadao	2021-04-15	2021-04-16	Campinas/SP	VALADAO, P. R. (2021). [WA4271725, Amazilia lactea (Lesson, 1832)]. Wiki Aves - A Enciclopédia das Aves do Brasil. Disponível em:	http://www.wikiaves.com/4271725
Chionomesa_lactea	Leonotis nepetifolia	Legitimate	Indeterminado	yes	Gabriel Mello	2021-04-19	2021-04-29	Queimados/RJ	MELLO, G. J. (2021). [WA4288676, Amazilia lactea (Lesson, 1832)]. Wiki Aves - A Enciclopédia das Aves do Brasil. Disponível em:	http://www.wikiaves.com/4288676
Chionomesa_lactea	Holmskioldia	Legitimate	Indeterminado	yes	Rafaela Bisacchi	2020-05-14	2020-05-14	Bocaina de Minas/MG	OLIVEIRA, R. B. (2020). [WA3798269, Amazilia lactea (Lesson, 1832)]. Wiki Aves - A Enciclopédia das Aves do Brasil.Disponível em:	http://www.wikiaves.com/3798269
Chionomesa_lactea	Leonotis nepetifolia	Legitimate	Indeterminado	yes	Victor Vale	2020-06-18	2020-06-22	Nova Venécia/ES	VALE, V. (2020). [WA3848752, Amazilia lactea (Lesson, 1832)]. Wiki Aves - A Enciclopédia das Aves do Brasil. Disponível em:	http://www.wikiaves.com/3848752
Chionomesa_lactea	Erythrina speciosa	Legitimate	Indeterminado	yes	Jfernandoribeiro	2020-05-09	2020-06-10	Teresópolis/RJ	RIBEIRO, J. F. (2020). [WA3831958, Amazilia lactea (Lesson, 1832)]. Wiki Aves - A Enciclopédia das Aves do Brasil. Disponível em:	http://www.wikiaves.com/3831958
Chionomesa_lactea	Luehea grandiflora	Legitimate	Indeterminado	Not determined	William Godoi	2020-07-08	2020-07-10	Cajamar/SP	GODOI, W. P. (2020). [WA3871814, Amazilia lactea (Lesson, 1832)]. Wiki Aves - A Enciclopédia das Aves do Brasil. Disponível em:	http://www.wikiaves.com/3871814
Chionomesa_lactea	Carica papaya	Legitimate	Indeterminado	yes	Clenia Farias	2020-06-24	2020-07-03	Vargem Bonita/MG	FARIAS, C. L. (2020). [WA3862571, Amazilia lactea (Lesson, 1832)]. Wiki Aves - A Enciclopédia das Aves do Brasil. Disponível em:	http://www.wikiaves.com/3862571
Chionomesa_lactea	Grevillea banksii	Legitimate	Indeterminado	yes	Mariza Sanches	2020-05-23	2020-07-18	Piraju/SP	SANCHES, M. (2020). [WA3882593, Amazilia lactea (Lesson, 1832)]. Wiki Aves - A Enciclopédia das Aves do Brasil. Disponível em:	http://www.wikiaves.com/3882593
Chionomesa_lactea	Petrea volubilis	Legitimate	Indeterminado	yes	R.Silva	2020-07-05	2020-07-23	Itu/SP	SILVA, R. (2020). [WA3890501, Amazilia lactea (Lesson, 1832)]. Wiki Aves - A Enciclopédia das Aves do Brasil. Disponível em:	http://www.wikiaves.com/3890501
Chionomesa_lactea	Cestrum	Legitimate	Indeterminado	yes	Luisa Melo	2020-07-18	2020-08-15	Nova Friburgo/RJ	MELO, L. (2020). [WA3924827, Amazilia lactea (Lesson, 1832)]. Wiki Aves - A Enciclopédia das Aves do Brasil. Disponível em:	http://www.wikiaves.com/3924827
Chionomesa_lactea	Coleus barbatus	Legitimate	Indeterminado	Not determined	Jaqueline_Rodrigues	2020-08-09	2020-08-20	Piedade/SP	RODRIGUES, J. (2020). [WA3933417, Amazilia lactea (Lesson, 1832)]. Wiki Aves - A Enciclopédia das Aves do Brasil. Disponível em:	http://www.wikiaves.com/3933417
Chionomesa_lactea	Callistemon sp	Legitimate	Indeterminado	yes	Kaique Soares	2020-08-25	2020-08-25	Carvalhópolis/MG	FREITAS, K. S. (2020). [WA3941426, Amazilia lactea (Lesson, 1832)]. Wiki Aves - A Enciclopédia das Aves do Brasil. Disponível em:	http://www.wikiaves.com/3941426
Chionomesa_lactea	Justicia brandegeana	Legitimate	Indeterminado	yes	Jose G. Oliveira	2020-07-21	2020-09-12	Cesário Lange/SP	OLIVEIRA, J. G. (2020). [WA3967995, Amazilia lactea (Lesson, 1832)]. Wiki Aves - A Enciclopédia das Aves do Brasil. Disponível em:	http://www.wikiaves.com/3967995
Chionomesa_lactea	Erythrina speciosa	Legitimate	Indeterminado	Not determined	Bernardo Grossi	2020-08-15	2020-09-22	Barbacena/MG	BERNARDO (2020). [WA3983187, Amazilia lactea (Lesson, 1832)]. Wiki Aves - A Enciclopédia das Aves do Brasil. Disponível em:	http://www.wikiaves.com/3983187
Chionomesa_lactea	Inga	Legitimate	Indeterminado	yes	Daniel Mello	2020-10-03	2020-10-16	Rio Preto/MG	MELLO, D. J. (2020). [WA4022329, Amazilia lactea (Lesson, 1832)]. Wiki Aves - A Enciclopédia das Aves do Brasil. Disponível em:	http://www.wikiaves.com/4022329
Chionomesa_lactea	Qualea cordata	Legitimate	Indeterminado	yes	Alexandre Habib	2020-10-10	2020-10-12	São José da Varginha/MG	HABIB, A. S. (2020). [WA4013941, Amazilia lactea (Lesson, 1832)]. Wiki Aves - A Enciclopédia das Aves do Brasil. Disponível em:	http://www.wikiaves.com/4013941
Chionomesa_lactea	Glandularia	Legitimate	Indeterminado	yes	Juliana Alvim	2020-11-03	2020-11-03	Chiador/MG	ALVIM, J. (2020). [WA4055601, Amazilia lactea (Lesson, 1832)]. Wiki Aves - A Enciclopédia das Aves do Brasil. Disponível em:	http://www.wikiaves.com/4055601
Chionomesa_lactea	Lantana camara	Legitimate	Indeterminado	yes	Marcos Barroso	2020-11-07	2020-11-07	Muriaé/MG	BARROSO, M. B. (2020). [WA4062377, Amazilia lactea (Lesson, 1832)]. Wiki Aves - A Enciclopédia das Aves do Brasil. Disponível em:	http://www.wikiaves.com/4062377
Chionomesa_lactea	Tithonia diversifolia	Legitimate	Indeterminado	Not determined	Wellington F. Lima	2020-10-11	2020-11-26	Juiz de Fora/MG	LIMA, W. F. (2020). [WA4093209, Amazilia lactea (Lesson, 1832)]. Wiki Aves - A Enciclopédia das Aves do Brasil. Disponível em:	http://www.wikiaves.com/4093209
Chionomesa_lactea	Combretum fruticosum	Legitimate	Indeterminado	yes	Edson Guilherme	2020-11-13	2020-11-13	Rio Branco/AC	GUILHERME, E. (2020). [WA4072506, Amazilia lactea (Lesson, 1832)]. Wiki Aves - A Enciclopédia das Aves do Brasil. Disponível em:	http://www.wikiaves.com/4072506
Chionomesa_lactea	Zinnia	Legitimate	Indeterminado	yes	Wallace Correa	2020-12-30	2021-01-02	Sardoá/MG	CORREA, W. D. (2020). [WA4145020, Amazilia lactea (Lesson, 1832)]. Wiki Aves - A Enciclopédia das Aves do Brasil. Disponível em:	http://www.wikiaves.com/4145020
Chionomesa_lactea	Inga	Legitimate	Indeterminado	yes	Francisco Bezerra Neto	2020-12-19	2021-02-28	Arinos/MG	BEZERRA, F. V. (2020). [WA4212989, Amazilia lactea (Lesson, 1832)]. Wiki Aves - A Enciclopédia das Aves do Brasil. Disponível em:	http://www.wikiaves.com/4212989
Chionomesa_lactea	Tecoma stans (L.) Juss. ex Kunth (Bignoniaceae)	Theft	Not determined	yes	Amaury Pimenta	2019-04-18	2019-04-21	Nova Lima/MG	PIMENTA, A. L. (2019). [WA3336574, Amazilia lactea (Lesson, 1832)]. Wiki Aves - A Enciclopédia das Aves do Brasil.Disponível em: <http://www.wikiaves.com/3336574> Acesso em: 16 Jan 2020.	http://www.wikiaves.com/3336574
Chionomesa_lactea	Euphorbia pulcherrima	Theft	Not determined	yes	Sergio Tasca ( Sergio Estrada)	2019-06-15	2019-06-17	Ouro Preto/MG	TASCA, S. D. (2019). [WA3389824, Amazilia lactea (Lesson, 1832)]. Wiki Aves - A Enciclopédia das Aves do Brasil.Disponível em: <http://www.wikiaves.com/3389824> Acesso em: 15 Jan 2020.	http://www.wikiaves.com/3389824
Chionomesa_lactea	Thunbergia mysorensis	Theft	Indeterminado	yes	Teca Resende	2020-07-22	2020-07-23	Lima Duarte/MG	RESENDE, T. C. (2020). [WA3890261, Amazilia lactea (Lesson, 1832)]. Wiki Aves - A Enciclopédia das Aves do Brasil. Disponível em:	http://www.wikiaves.com/3890261
Chionomesa_lactea	Ceiba glaziovii	Theft	Indeterminado	Not determined	Gabriel Rodrigues	2020-08-12	2020-08-17	Socorro/SP	SILVA, G. R. (2020). [WA3928863, Amazilia lactea (Lesson, 1832)]. Wiki Aves - A Enciclopédia das Aves do Brasil. Disponível em:	http://www.wikiaves.com/3928863
Chionomesa_lactea	Iochroma arborescens	Theft	Indeterminado	yes	Luis Fillipe Couto	2020-08-16	2020-08-31	Mendes/RJ	PEREIRA, L. F. (2020). [WA3951061, Amazilia lactea (Lesson, 1832)]. Wiki Aves - A Enciclopédia das Aves do Brasil. Disponível em:	http://www.wikiaves.com/3951061
Chionomesa_lactea	Malvaviscus arboreus	Robber	Not determined	yes	Mateus Vilanova	2019-12-20	2019-12-20	Piranguçu/MG	VILANOVA, M. R. (2019). [WA3613913, Amazilia lactea (Lesson, 1832)]. Wiki Aves - A Enciclopédia das Aves do Brasil.Disponível em: <http://www.wikiaves.com/3613913> Acesso em: 13 Jan 2020.	http://www.wikiaves.com/3613913
Chionomesa_lactea	Malvaviscus arboreus	Robber	Not determined	yes	Adilson Costa	2019-04-26	2019-05-16	Ibiraci/MG	COSTA, A. D. (2019). [WA3359670, Amazilia lactea (Lesson, 1832)]. Wiki Aves - A Enciclopédia das Aves do Brasil.Disponível em: <http://www.wikiaves.com/3359670> Acesso em: 14 Jan 2020.	http://www.wikiaves.com/3359670
Chionomesa_lactea	Hedychium coronarium	Robber	Indeterminado	yes	Cadu Young	2021-03-21	2021-04-02	Nova Friburgo/RJ	YOUNG, C. (2021). [WA4255685, Amazilia lactea (Lesson, 1832)]. Wiki Aves - A Enciclopédia das Aves do Brasil. Disponível em:	http://www.wikiaves.com/4255685
Chionomesa_lactea	Callianthe striata	Robber	Indeterminado	yes	Igino Rotta	2021-05-01	2021-05-01	Tatuí/SP	ROTTA, I. (2021). [WA4291592, Amazilia lactea (Lesson, 1832)]. Wiki Aves - A Enciclopédia das Aves do Brasil. Disponível em:	http://www.wikiaves.com/4291592
Chionomesa_lactea	Callianthe striata	Robber	Indeterminado	yes	Igino Rotta	2021-05-01	2021-05-01	Tatuí/SP	ROTTA, I. (2021). [WA4291595, Amazilia lactea (Lesson, 1832)]. Wiki Aves - A Enciclopédia das Aves do Brasil. Disponível em:	http://www.wikiaves.com/4291595
Chionomesa_lactea	Handroanthus	Robber	Indeterminado	yes	Alexandre G. Silva	2020-06-08	2020-06-08	Juiz de Fora/MG	SILVA, A. M. (2020). [WA3830359, Amazilia lactea (Lesson, 1832)]. Wiki Aves - A Enciclopédia das Aves do Brasil. Disponível em:	http://www.wikiaves.com/3830359
Chionomesa_lactea	Thunbergia grandiflora	Robber	Indeterminado	yes	Cornélio Morais	2020-06-11	2020-06-12	Cambuí/MG	MORAIS, C. A. (2020). [WA3834547, Amazilia lactea (Lesson, 1832)]. Wiki Aves - A Enciclopédia das Aves do Brasil. Disponível em:	http://www.wikiaves.com/3834547
Chionomesa_lactea	Handroanthus	Robber	Indeterminado	yes	Donizete Carvalho	2020-08-07	2020-08-08	Monte Alto/SP	CARVALHO, D. A. (2020). [WA3915736, Amazilia lactea (Lesson, 1832)]. Wiki Aves - A Enciclopédia das Aves do Brasil. Disponível em:	http://www.wikiaves.com/3915736
Chionomesa_lactea	Callianthe striata	Robber	Indeterminado	yes	Igino Rotta	2020-11-07	2020-11-12	Tatuí/SP	ROTTA, I. (2020). [WA4070742, Amazilia lactea (Lesson, 1832)]. Wiki Aves - A Enciclopédia das Aves do Brasil. Disponível em:	http://www.wikiaves.com/4070742
Chionomesa_lactea	Sinningia	Robber	Indeterminado	yes	Washington Reis	2020-12-11	2021-01-17	Itajubá/MG	REIS, W. B. (2020). [WA4167085, Amazilia lactea (Lesson, 1832)]. Wiki Aves - A Enciclopédia das Aves do Brasil. Disponível em:	http://www.wikiaves.com/4167085
Chionomesa_lactea	Hedychium coronarium	Robber	Indeterminado	yes	Cadu Young	2021-03-21	2021-04-02	Nova Friburgo/RJ	YOUNG, C. (2021). [WA4255686, Amazilia lactea (Lesson, 1832)]. Wiki Aves - A Enciclopédia das Aves do Brasil. Disponível em:	http://www.wikiaves.com/4255686
Chlorestes_cyanus	Anacardium occidentale	Legitimate	Male	yes	Robson Czaban	2017-07-15	2017-07-20	Manacapuru/AM	CZABAN, R. E. (2017). [WA2627046, Hylocharis cyanus (Vieillot, 1818)]. Wiki Aves - A Enciclopédia das Aves do Brasil.Disponível em: <http://www.wikiaves.com/2627046> Acesso em: 03 Mar 2020.	http://www.wikiaves.com/2627046
Chlorestes_cyanus	Grevillea banksii	Legitimate	Male	yes	Rosemberg Martins	2013-07-27	2013-09-09	Santa Teresa/ES	MARTINS, R. F. (2013). [WA1077650, Hylocharis cyanus (Vieillot, 1818)]. Wiki Aves - A Enciclopédia das Aves do Brasil.Disponível em: <http://www.wikiaves.com/1077650> Acesso em: 04 Mar 2020.	http://www.wikiaves.com/1077650
Chlorestes_cyanus	Grevillea banksii	Legitimate	Not determined	yes	Luisa Magalhaes	2013-08-03	2013-08-13	Santa Teresa/ES	MAGALHAES, L. M. (2013). [WA1047798, Hylocharis cyanus (Vieillot, 1818)]. Wiki Aves - A Enciclopédia das Aves do Brasil.Disponível em: <http://www.wikiaves.com/1047798> Acesso em: 04 Mar 2020.	http://www.wikiaves.com/1047798
Chlorestes_cyanus	Inga	Legitimate	Male	yes	Maíra Santos	2019-06-17	2019-06-30	Mâncio Lima/AC	SANTOS, M. (2019). [WA3403337, Hylocharis cyanus (Vieillot, 1818)]. Wiki Aves - A Enciclopédia das Aves do Brasil.Disponível em: <http://www.wikiaves.com/3403337> Acesso em: 03 Mar 2020.	http://www.wikiaves.com/3403337
Chlorestes_cyanus	Inga	Legitimate	Male	Not determined	Adilson Constantini	2017-08-04	2017-08-14	Alta Floresta/MT	CONSTANTINI, A. C. (2017). [WA2659963, Hylocharis cyanus (Vieillot, 1818)]. Wiki Aves - A Enciclopédia das Aves do Brasil.Disponível em: <http://www.wikiaves.com/2659963> Acesso em: 03 Mar 2020.	http://www.wikiaves.com/2659963
Chlorestes_cyanus	Psychotria sp.	Legitimate	Male	yes	Anselmo d`Affonseca	2014-04-20	2014-04-30	Caracaraí/RR	DAFFONSECA, J. A. (2014). [WA1314163, Hylocharis cyanus (Vieillot, 1818)]. Wiki Aves - A Enciclopédia das Aves do Brasil.Disponível em: <http://www.wikiaves.com/1314163> Acesso em: 04 Mar 2020.	http://www.wikiaves.com/1314163
Chlorestes_cyanus	Lantana camara	Legitimate	Not determined	Not determined	Luca Barboza	2018-03-31	2018-03-31	Teresópolis/RJ	BARBOZA, L. (2018). [WA2927193, Hylocharis cyanus (Vieillot, 1818)]. Wiki Aves - A Enciclopédia das Aves do Brasil.Disponível em: <http://www.wikiaves.com/2927193> Acesso em: 03 Mar 2020.	http://www.wikiaves.com/2927193
Chlorestes_cyanus	Lantana camara	Legitimate	Male	yes	Thiago Lyra	2016-05-27	2016-06-27	Porciúncula/RJ	LYRA, T. R. (2016). [WA2172242, Hylocharis cyanus (Vieillot, 1818)]. Wiki Aves - A Enciclopédia das Aves do Brasil.Disponível em: <http://www.wikiaves.com/2172242> Acesso em: 03 Mar 2020	http://www.wikiaves.com/2172242
Chlorestes_cyanus	Lantana camara	Legitimate	Male	yes	Ery Decottignies	2017-05-09	2017-05-11	Nova Iguaçu/RJ	DECOTTIGNIES, E. (2017). [WA2554550, Hylocharis cyanus (Vieillot, 1818)]. Wiki Aves - A Enciclopédia das Aves do Brasil.Disponível em: <http://www.wikiaves.com/2554550> Acesso em: 03 Mar 2020.	http://www.wikiaves.com/2554550
Chlorestes_cyanus	Lantana camara	Legitimate	Not determined	Not determined	Lior Martins	2016-04-16	2016-04-18	Cachoeiras de Macacu/RJ	MARTINS, R. (2016). [WA2089373, Hylocharis cyanus (Vieillot, 1818)]. Wiki Aves - A Enciclopédia das Aves do Brasil.Disponível em: <http://www.wikiaves.com/2089373> Acesso em: 03 Mar 2020.	http://www.wikiaves.com/2089373
Chlorestes_cyanus	Lantana camara	Legitimate	Male	yes	João Andrade (Dedé)	2016-05-27	2016-05-28	Domingos Martins/ES	ANDRADE, J. (2016). [WA2133939, Hylocharis cyanus (Vieillot, 1818)]. Wiki Aves - A Enciclopédia das Aves do Brasil.Disponível em: <http://www.wikiaves.com/2133939> Acesso em: 03 Mar 2020.	http://www.wikiaves.com/2133939
Chlorestes_cyanus	Lantana camara	Legitimate	Male	yes	stephen Jones	2014-02-16	2014-02-20	Jaqueira/PE	JONES, S. J. (2014). [WA1251718, Hylocharis cyanus (Vieillot, 1818)]. Wiki Aves - A Enciclopédia das Aves do Brasil.Disponível em: <http://www.wikiaves.com/1251718> Acesso em: 04 Mar 2020.	http://www.wikiaves.com/1251718
Chlorestes_cyanus	Lantana camara	Legitimate	Male	yes	Daniel Zorzi	2013-10-25	2013-10-25	Miraí/MG	ZORZI, D. (2013). [WA1131749, Hylocharis cyanus (Vieillot, 1818)]. Wiki Aves - A Enciclopédia das Aves do Brasil.Disponível em: <http://www.wikiaves.com/1131749> Acesso em: 04 Mar 2020.	http://www.wikiaves.com/1131749
Chlorestes_cyanus	Lantana camara	Legitimate	Female	Not determined	Helcio Menezes	2013-08-04	2013-08-25	Miracema/RJ	MENEZES, H. G. (2013). [WA1060460, Hylocharis cyanus (Vieillot, 1818)]. Wiki Aves - A Enciclopédia das Aves do Brasil.Disponível em: <http://www.wikiaves.com/1060460> Acesso em: 04 Mar 2020.	http://www.wikiaves.com/1060460
Chlorestes_cyanus	Lantana camara	Legitimate	Not determined	yes	Luiz Moschini De Souza	2012-02-20	2012-02-23	Maricá/RJ	SOUZA, L. A. (2012). [WA579728, Hylocharis cyanus (Vieillot, 1818)]. Wiki Aves - A Enciclopédia das Aves do Brasil.Disponível em: <http://www.wikiaves.com/579728> Acesso em: 04 Mar 2020.	http://www.wikiaves.com/579728
Chlorestes_cyanus	Lantana camara	Legitimate	Female	yes	stephen Jones	2011-01-18	2011-02-07	Jaqueira/PE	JONES, S. J. (2011). [WA292833, Hylocharis cyanus (Vieillot, 1818)]. Wiki Aves - A Enciclopédia das Aves do Brasil.Disponível em: <http://www.wikiaves.com/292833> Acesso em: 04 Mar 2020.	http://www.wikiaves.com/292833
Chlorestes_cyanus	Lantana camara	Legitimate	Male	yes	Lucas Vasconcellos	2011-10-02	2012-03-03	Rio Bonito/RJ	VASCONCELLOS, L. (2011). [WA587841, Hylocharis cyanus (Vieillot, 1818)]. Wiki Aves - A Enciclopédia das Aves do Brasil.Disponível em: <http://www.wikiaves.com/587841> Acesso em: 04 Mar 2020.	http://www.wikiaves.com/587841
Chlorestes_cyanus	Lantana camara	Legitimate	Female	Not determined	Luís Roberto Silva	2010-04-10	2010-05-07	itacaré/BA	SILVA, L. R. (2010). [WA138886, Hylocharis cyanus (Vieillot, 1818)]. Wiki Aves - A Enciclopédia das Aves do Brasil.Disponível em: <http://www.wikiaves.com/138886> Acesso em: 04 Mar 2020.	http://www.wikiaves.com/138886
Chlorestes_cyanus	Passiflora	Legitimate	Male	yes	Valdir Hobus	2011-08-30	2011-08-31	Cláudia/MT	HOBUS, V. (2011). [WA431284, Hylocharis cyanus (Vieillot, 1818)]. Wiki Aves - A Enciclopédia das Aves do Brasil.Disponível em: <http://www.wikiaves.com/431284> Acesso em: 04 Mar 2020.	http://www.wikiaves.com/431284
Chlorestes_cyanus	Pseudogynoxys chenopodioides	Legitimate	Male	yes	stephen Jones	2014-11-16	2014-11-17	Jaqueira/PE	JONES, S. J. (2014). [WA1518589, Hylocharis cyanus (Vieillot, 1818)]. Wiki Aves - A Enciclopédia das Aves do Brasil.Disponível em: <http://www.wikiaves.com/1518589> Acesso em: 04 Mar 2020.	http://www.wikiaves.com/1518589
Chlorestes_cyanus	Pseudogynoxys chenopodioides	Legitimate	Male	yes	stephen Jones	2009-09-07	2009-09-07	Jaqueira/PE	JONES, S. J. (2009). [WA53768, Hylocharis cyanus (Vieillot, 1818)]. Wiki Aves - A Enciclopédia das Aves do Brasil.Disponível em: <http://www.wikiaves.com/53768> Acesso em: 04 Mar 2020.	http://www.wikiaves.com/53768
Chlorestes_cyanus	Russelia equisetiformis	Legitimate	Not determined	Not determined	Vandir Andrade (Junior Petar)	2013-04-18	2013-04-20	Iporanga/SP	JÚNIOR, V. A. (2013). [WA938956, Hylocharis cyanus (Vieillot, 1818)]. Wiki Aves - A Enciclopédia das Aves do Brasil.Disponível em: <http://www.wikiaves.com/938956> Acesso em: 04 Mar 2020.	http://www.wikiaves.com/938956
Chlorestes_cyanus	Salvia	Legitimate	Male	yes	Helcio Menezes	2017-04-02	2017-04-03	Miracema/RJ	MENEZES, H. G. (2017). [WA2515256, Hylocharis cyanus (Vieillot, 1818)]. Wiki Aves - A Enciclopédia das Aves do Brasil.Disponível em: <http://www.wikiaves.com/2515256> Acesso em: 04 Mar 2020.	http://www.wikiaves.com/2515256
Chlorestes_cyanus	Tillandsia	Legitimate	Not determined	yes	José Nélio Miranda	2017-04-28	2017-05-01	Paraty/RJ	JOSENELIO (2017). [WA2543444, Hylocharis cyanus (Vieillot, 1818)]. Wiki Aves - A Enciclopédia das Aves do Brasil.Disponível em: <http://www.wikiaves.com/2543444> Acesso em: 04 Mar 2020.	http://www.wikiaves.com/2543444
Chlorestes_cyanus	Tithonia rotundifolia	Legitimate	Male	yes	Guilherme Serpa	2019-11-02	2019-11-04	Rio Bonito/RJ	SERPA, G. A. (2019). [WA3558480, Hylocharis cyanus (Vieillot, 1818)]. Wiki Aves - A Enciclopédia das Aves do Brasil.Disponível em: <http://www.wikiaves.com/3558480> Acesso em: 03 Mar 2020.	http://www.wikiaves.com/3558480
Chlorestes_cyanus	Zinnia peruviana	Legitimate	Male	yes	Francisco Hamada	2020-01-22	2020-01-31	Lagoa dos Gatos/PE	HAMADA, F. H. (2020). [WA3666877, Hylocharis cyanus (Vieillot, 1818)]. Wiki Aves - A Enciclopédia das Aves do Brasil.Disponível em: <http://www.wikiaves.com/3666877> Acesso em: 03 Mar 2020.	http://www.wikiaves.com/3666877
Chlorestes_cyanus	Zinnia peruviana	Legitimate	Male	yes	Flor G. Las-casas	2018-01-26	2018-06-21	Lagoa dos Gatos/PE	LAS-CASAS, F. M. (2018). [WA3010566, Hylocharis cyanus (Vieillot, 1818)]. Wiki Aves - A Enciclopédia das Aves do Brasil.Disponível em: <http://www.wikiaves.com/3010566> Acesso em: 03 Mar 2020.	http://www.wikiaves.com/3010566
Chlorestes_cyanus	Zinnia peruviana	Legitimate	Male	yes	Carlos Gussoni	2016-11-27	2016-12-05	lagoa dos Gatos/PE	GUSSONI, C. O. (2016). [WA2390797, Hylocharis cyanus (Vieillot, 1818)]. Wiki Aves - A Enciclopédia das Aves do Brasil.Disponível em: <http://www.wikiaves.com/2390797> Acesso em: 03 Mar 2020.	http://www.wikiaves.com/2390797
Chlorestes_cyanus	Zinnia peruviana	Legitimate	Male	yes	stephen Jones	2016-02-07	2016-02-13	lagoa dos Gatos/PE	JONES, S. J. (2016). [WA2020660, Hylocharis cyanus (Vieillot, 1818)]. Wiki Aves - A Enciclopédia das Aves do Brasil.Disponível em: <http://www.wikiaves.com/2020660> Acesso em: 03 Mar 2020.	http://www.wikiaves.com/2020660
Chlorestes_cyanus	Zinnia peruviana	Legitimate	Female	yes	Daniel Mello	2012-12-12	2013-05-23	Cachoeiras de Macacu/RJ	MELLO, D. J. (2012). [WA937445, Hylocharis cyanus (Vieillot, 1818)]. Wiki Aves - A Enciclopédia das Aves do Brasil.Disponível em: <http://www.wikiaves.com/937445> Acesso em: 04 Mar 2020.	http://www.wikiaves.com/937445
Chlorestes_cyanus	Lantana camara	Legitimate	Male	yes	Luciano Rossato Dias	2020-11-02	2020-11-30	Ubatuba/SP	DIAS, L. R. (2020). [WA4099374, Hylocharis cyanus (Vieillot, 1818)]. Wiki Aves - A Enciclopédia das Aves do Brasil. Disponível em:	http://www.wikiaves.com/4099374
Chlorestes_cyanus	Lantana camara	Legitimate	Male	yes	Jose Matiello	2020-11-07	2020-11-09	Rio Bananal/ES	MATIELLO, J. D. (2020). [WA4066555, Hylocharis cyanus (Vieillot, 1818)]. Wiki Aves - A Enciclopédia das Aves do Brasil. Disponível em:	http://www.wikiaves.com/4066555
Chlorestes_cyanus	Inga	Legitimate	Female	yes	Luciano D. Conceição	2020-08-13	2020-08-14	Carlinda/MT	CONCEIÇÃO, L. D. (2020). [WA3923765, Hylocharis cyanus (Vieillot, 1818)]. Wiki Aves - A Enciclopédia das Aves do Brasil.Disponível em:	http://www.wikiaves.com/3923765
Chlorestes_cyanus	Caesalpinia pulcherrima	Theft	Male	No	Luiz Baroni Junior	2011-03-20	2011-04-04	Silva Jardim/RJ	BARONI, L. F. (2011). [WA324378, Hylocharis cyanus (Vieillot, 1818)]. Wiki Aves - A Enciclopédia das Aves do Brasil.Disponível em: <http://www.wikiaves.com/324378> Acesso em: 04 Mar 2020.	http://www.wikiaves.com/324378
Chlorestes_cyanus	Erythrina speciosa	Theft	Indeterminado	Not determined	Pedro Behne	2020-07-21	2020-07-21	Peruíbe/SP	BEHNE, P. B. (2020). [WA3887858, Hylocharis cyanus (Vieillot, 1818)]. Wiki Aves - A Enciclopédia das Aves do Brasil. Disponível em:	http://www.wikiaves.com/3887858
Chlorestes_cyanus	Malvaviscus arboreus	Robber	Male	yes	Bruno Neri Peruibisbird Guia	2019-09-07	2019-09-08	Peruíbe/SP	BRUNONERI (2019). [WA3483144, Hylocharis cyanus (Vieillot, 1818)]. Wiki Aves - A Enciclopédia das Aves do Brasil.Disponível em: <http://www.wikiaves.com/3483144> Acesso em: 03 Mar 2020.	http://www.wikiaves.com/3483144
Chlorestes_cyanus	Malvaviscus arboreus	Robber	Male	yes	Angela Salgado	2015-05-29	2015-06-02	Mongaguá/SP	SALGADO, A. M. (2015). [WA1712616, Hylocharis cyanus (Vieillot, 1818)]. Wiki Aves - A Enciclopédia das Aves do Brasil.Disponível em: <http://www.wikiaves.com/1712616> Acesso em: 04 Mar 2020.	http://www.wikiaves.com/1712616
Chlorestes_cyanus	Malvaviscus arboreus	Robber	Male	yes	Lindolfo Souto	2012-05-18	2012-05-20	Itariri/SP	SOUTO, L. V. (2012). [WA642352, Hylocharis cyanus (Vieillot, 1818)]. Wiki Aves - A Enciclopédia das Aves do Brasil.Disponível em: <http://www.wikiaves.com/642352> Acesso em: 04 Mar 2020.	http://www.wikiaves.com/642352
Chlorestes_cyanus	Sanchezia	Robber	Female	yes	Alexandre Correia	2016-01-17	2016-07-15	Bertioga/SP	CORREIA, A. G. (2016). [WA2194932, Hylocharis cyanus (Vieillot, 1818)]. Wiki Aves - A Enciclopédia das Aves do Brasil.Disponível em: <http://www.wikiaves.com/2194932> Acesso em: 03 Mar 2020.	http://www.wikiaves.com/2194932
Chlorestes_cyanus	Malvaviscus arboreus	Robber	Male	Not determined	Luiz Paula	2020-09-06	2020-09-08	Bertioga/SP	PAULA, L. A. (2020). [WA3963865, Hylocharis cyanus (Vieillot, 1818)]. Wiki Aves - A Enciclopédia das Aves do Brasil. Disponível em:	http://www.wikiaves.com/3963865
Chlorestes_notata	Antigonon leptopus	Legitimate	Male	yes	JulioHBM	2019-05-18	2019-05-21	Mata de São João/BA	MELO, J. H. (2019). [WA3363737, Chlorestes notata (Reich, 1793)]. Wiki Aves - A Enciclopédia das Aves do Brasil. Disponível em: <http://www.wikiaves.com/3363737> Acesso em: 15 Out 2019	http://www.wikiaves.com/3363737
Chlorestes_notata	Callistemon citrinus	Legitimate	Male	yes	Felipe Silva	2014-08-08	2017-09-08	Natal/RN	SILV, F. D. (2014). [WA2688555, Chlorestes notata (Reich, 1793)]. Wiki Aves - A Enciclopédia das Aves do Brasil.Disponível em: <http://www.wikiaves.com/2688555> Acesso em: 18 Nov 2019.	http://www.wikiaves.com/2688555
Chlorestes_notata	Anacardium	Legitimate	Male	yes	Gleice Gloria	2019-07-18	2019-07-31	Manacapuru/AM	GLORIA, G. (2019). [WA3439498, Chlorestes notata (Reich, 1793)]. Wiki Aves - A Enciclopédia das Aves do Brasil. Disponível em: <http://www.wikiaves.com/3439498> Acesso em: 15 Out 2019.	http://www.wikiaves.com/3439498
Chlorestes_notata	Grevillea banksii	Legitimate	Male	yes	Gabriel Caram	2018-04-03	2018-05-08	Santa Cruz Cabrália/BA	CARAM, G. S. (2018). [WA2967273, Chlorestes notata (Reich, 1793)]. Wiki Aves - A Enciclopédia das Aves do Brasil.Disponível em: <http://www.wikiaves.com/2967273> Acesso em: 18 Nov 2019.	http://www.wikiaves.com/2967273
Chlorestes_notata	Ixora coccinea	Legitimate	Not determined	Not determined	Rubem Almeida	2019-08-22	2019-08-22	Salvador/BA	ALMEIDA, R. (2019). [WA3463004, Chlorestes notata (Reich, 1793)]. Wiki Aves - A Enciclopédia das Aves do Brasil. Disponível em: <http://www.wikiaves.com/3463004> Acesso em: 15 Out 2019.	http://www.wikiaves.com/3463004
Chlorestes_notata	Lantana camara	Legitimate	Female	yes	José do Egito maracajá Junior	2018-05-01	2018-05-09	Manacapuru/AM	MARACAJÁ, J. E. (2018). [WA2968355, Chlorestes notata (Reich, 1793)]. Wiki Aves - A Enciclopédia das Aves do Brasil.Disponível em: <http://www.wikiaves.com/2968355> Acesso em: 18 Nov 2019.	http://www.wikiaves.com/2968355
Chlorestes_notata	Mussaenda erythrophylla	Legitimate	Male	yes	Nailson Júnior	2017-12-15	2018-02-10	Marituba/PA	JÚNIOR, N. A. (2017). [WA2878871, Chlorestes notata (Reich, 1793)]. Wiki Aves - A Enciclopédia das Aves do Brasil.Disponível em: <http://www.wikiaves.com/2878871> Acesso em: 18 Nov 2019.	http://www.wikiaves.com/2878871
Chlorestes_notata	Psittacanthus	Legitimate	Male	yes	Eduardo Vieira 1301	2018-02-23	2018-02-23	Maceió/AL	VIEIRA, E. (2018). [WA2894869, Chlorestes notata (Reich, 1793)]. Wiki Aves - A Enciclopédia das Aves do Brasil.Disponível em: <http://www.wikiaves.com/2894869> Acesso em: 18 Nov 2019.	http://www.wikiaves.com/2894869
Chlorestes_notata	Zinnia peruviana	Legitimate	Not determined	Not determined	Patrícia Gabriela	2017-12-09	2017-12-17	Jaqueira/PE	OLIVEIRA, P. G. (2017). [WA2817998, Chlorestes notata (Reich, 1793)]. Wiki Aves - A Enciclopédia das Aves do Brasil.Disponível em: <http://www.wikiaves.com/2817998> Acesso em: 18 Nov 2019.	http://www.wikiaves.com/2817998
Chlorestes_notata	Lantana camara	Legitimate	Female	yes	Nicky Czaban	2020-06-03	2020-06-05	Careiro da Várzea/AM	CZABAN, N. (2020). [WA3825648, Chlorestes notata (Reich, 1793)]. Wiki Aves - A Enciclopédia das Aves do Brasil. Disponível em:	http://www.wikiaves.com/3825648
Chlorestes_notata	Poeppigia	Legitimate	Indeterminado	yes	Lucas Sobral dos Santos	2020-05-14	2020-08-07	Rio Branco/AC	SANTOS, L. S. (2020). [WA3913556, Chlorestes notata (Reich, 1793)]. Wiki Aves - A Enciclopédia das Aves do Brasil. Disponível em:	http://www.wikiaves.com/3913556
Chlorestes_notata	Waltheria	Legitimate	Male	yes	Clenia Farias	2020-07-22	2020-07-23	Santa Cruz Cabrália/BA	FARIAS, C. L. (2020). [WA3890196, Chlorestes notata (Reich, 1793)]. Wiki Aves - A Enciclopédia das Aves do Brasil. Disponível em:	http://www.wikiaves.com/3890196
Chlorestes_notata	Inga	Legitimate	Male	yes	Gilberto Silva Vieira	2021-01-02	2021-01-04	São Domingos do Araguaia/PA	VIEIRA, G. S. (2021). [WA4149700, Chlorestes notata (Reich, 1793)]. Wiki Aves - A Enciclopédia das Aves do Brasil. Disponível em:	http://www.wikiaves.com/4149700
Chlorestes_notata	Serjania	Legitimate	Male	yes	Pedro Callado	2021-01-19	2021-01-19	Pitimbu/PB	CALLADO, P. (2021). [WA4170051, Chlorestes notata (Reich, 1793)]. Wiki Aves - A Enciclopédia das Aves do Brasil. Disponível em:	http://www.wikiaves.com/4170051
Chlorestes_notata	Ixora	Legitimate	Indeterminado	yes	Silvia Faustino Linhares	2021-01-29	2021-02-06	Natal/RN	LINHARES, S. F. (2021). [WA4192812, Chlorestes notata (Reich, 1793)]. Wiki Aves - A Enciclopédia das Aves do Brasil. Disponível em:	http://www.wikiaves.com/4192812
Chlorestes_notata	Erythrina poeppigiana (Walp.) O.F.Cook	Theft	Male	yes	Emerson Kaseker	2016-06-24	2018-01-13	Camacan/BA	KASEKER, E. P. (2016). [WA2845658, Chlorestes notata (Reich, 1793)]. Wiki Aves - A Enciclopédia das Aves do Brasil. Disponível em: <http://www.wikiaves.com/2845658> Acesso em: 18 Nov 2019.	http://www.wikiaves.com/2845658
Chlorostilbon_lucidus	Aechmea	Legitimate	Male	yes	Mateus Gonçalves	2015-11-22	2016-01-22	Poções/BA	SANTOS, M. G. (2015). [WA1994826, Chlorostilbon lucidus (Shaw, 1812)]. Wiki Aves - A Enciclopédia das Aves do Brasil.Disponível em: <http://www.wikiaves.com/1994826> Acesso em: 09 Abr 2020.	http://www.wikiaves.com/1994826
Chlorostilbon_lucidus	Agapanthus africanus (L.) Hoffmanns.	Legitimate	Male	yes	Francisco Porto	2018-11-04	2019-04-05	São Lourenço/MG	PORTO, F. N. (2018). [WA3322785, Chlorostilbon lucidus (Shaw, 1812)]. Wiki Aves - A Enciclopédia das Aves do Brasil.Disponível em: <http://www.wikiaves.com/3322785> Acesso em: 05 Abr 2020.	http://www.wikiaves.com/3322785
Chlorostilbon_lucidus	Agapanthus africanus (L.) Hoffmanns.	Legitimate	Female	yes	Sandro Paixão	2017-12-25	2017-12-28	Gramado/RS	PAIXÃO, S. V. (2017). [WA2828694, Chlorostilbon lucidus (Shaw, 1812)]. Wiki Aves - A Enciclopédia das Aves do Brasil.Disponível em: <http://www.wikiaves.com/2828694> Acesso em: 05 Abr 2020.	http://www.wikiaves.com/2828694
Chlorostilbon_lucidus	Aloe	Legitimate	Male	yes	Andréa Pires	2018-05-01	2018-05-02	Teodoro Sampaio/SP	PIRES, A. S. (2018). [WA2959354, Chlorostilbon lucidus (Shaw, 1812)]. Wiki Aves - A Enciclopédia das Aves do Brasil.Disponível em: <http://www.wikiaves.com/2959354> Acesso em: 05 Abr 2020.	http://www.wikiaves.com/2959354
Chlorostilbon_lucidus	Bougainvillea	Legitimate	Female	yes	Tiago Elis	2019-12-29	2019-12-29	Equador/RN	SILVA, T. F. (2019). [WA3623890, Chlorostilbon lucidus (Shaw, 1812)]. Wiki Aves - A Enciclopédia das Aves do Brasil.Disponível em: <http://www.wikiaves.com/3623890> Acesso em: 05 Abr 2020.	http://www.wikiaves.com/3623890
Chlorostilbon_lucidus	Bougainvillea	Legitimate	Male	yes	Paulo Roberto Ferreira Megale	2017-05-31	2017-06-17	Ouro Fino/MG	MEGALE, P. R. (2017). [WA2590783, Chlorostilbon lucidus (Shaw, 1812)]. Wiki Aves - A Enciclopédia das Aves do Brasil.Disponível em: <http://www.wikiaves.com/2590783> Acesso em: 07 Abr 2020.	http://www.wikiaves.com/2590783
Chlorostilbon_lucidus	Bougainvillea	Legitimate	Not determined	No	Estevão Lobo	2016-01-12	2016-01-12	São Paulo/SP	LOBO, E. C. (2016). [WA1983022, Chlorostilbon lucidus (Shaw, 1812)]. Wiki Aves - A Enciclopédia das Aves do Brasil.Disponível em: <http://www.wikiaves.com/1983022> Acesso em: 09 Abr 2020.	http://www.wikiaves.com/1983022
Chlorostilbon_lucidus	Bougainvillea	Legitimate	Not determined	No	Maria Miranda	2015-08-15	2016-01-21	Matão/SP	MIRANDA, M. J. (2015). [WA1993415, Chlorostilbon lucidus (Shaw, 1812)]. Wiki Aves - A Enciclopédia das Aves do Brasil.Disponível em: <http://www.wikiaves.com/1993415> Acesso em: 09 Abr 2020.	http://www.wikiaves.com/1993415
Chlorostilbon_lucidus	Bougainvillea	Legitimate	Female	yes	Johnathan Meira	2015-11-14	2015-11-17	Boa Esperança/MG	MEIRA, J. (2015). [WA1914488, Chlorostilbon lucidus (Shaw, 1812)]. Wiki Aves - A Enciclopédia das Aves do Brasil.Disponível em: <http://www.wikiaves.com/1914488> Acesso em: 09 Abr 2020.	http://www.wikiaves.com/1914488
Chlorostilbon_lucidus	Cenostigma pluviosum (DC.) Gagnon & G.P.Lewis	Legitimate	Male	yes	Daniel Berbare	2017-10-22	2017-10-23	Morro Redondo/RS	BERBARE, D. A. (2017). [WA2748889, Chlorostilbon lucidus (Shaw, 1812)]. Wiki Aves - A Enciclopédia das Aves do Brasil.Disponível em: <http://www.wikiaves.com/2748889> Acesso em: 06 Abr 2020.	http://www.wikiaves.com/2748889
Chlorostilbon_lucidus	Cenostigma pluviosum (DC.) Gagnon & G.P.Lewis	Legitimate	Male	yes	Cátia Moreira	2017-09-23	2017-10-26	Piranga/MG	MOREIRA, C. G. (2017). [WA2752775, Chlorostilbon lucidus (Shaw, 1812)]. Wiki Aves - A Enciclopédia das Aves do Brasil.Disponível em: <http://www.wikiaves.com/2752775> Acesso em: 06 Abr 2020.	http://www.wikiaves.com/2752775
Chlorostilbon_lucidus	Caesalpinia pulcherrima	Legitimate	Not determined	Not determined	Wiliam Silva	2018-11-05	2018-11-07	São José do Rio Preto/SP	SILVA, W. R. (2018). [WA3171063, Chlorostilbon lucidus (Shaw, 1812)]. Wiki Aves - A Enciclopédia das Aves do Brasil.Disponível em: <http://www.wikiaves.com/3171063> Acesso em: 05 Abr 2020.	http://www.wikiaves.com/3171063
Chlorostilbon_lucidus	Calliandra	Legitimate	Female	yes	Ingrid Sessegolo	2018-02-13	2018-10-14	Uruguaiana/RS	SESSEGOLO, I. (2018). [WA3144788, Chlorostilbon lucidus (Shaw, 1812)]. Wiki Aves - A Enciclopédia das Aves do Brasil.Disponível em: <http://www.wikiaves.com/3144788> Acesso em: 05 Abr 2020.	http://www.wikiaves.com/3144788
Chlorostilbon_lucidus	Calliandra	Legitimate	Female	yes	Pouso Alegre/MG	2016-09-09	2016-09-09	Pouso Alegre/MG	JOSENELIO (2016). [WA2270325, Chlorostilbon lucidus (Shaw, 1812)]. Wiki Aves - A Enciclopédia das Aves do Brasil.Disponível em: <http://www.wikiaves.com/2270325> Acesso em: 08 Abr 2020.	http://www.wikiaves.com/2270325
Chlorostilbon_lucidus	Malvaviscus (Malvaceae)	Legitimate	Male	yes	Cacilda Salvador	2019-07-07	2019-07-07	Mogi das Cruzes/SP	SALVADOR, C. M. (2019). [WA3410540, Chlorostilbon lucidus (Shaw, 1812)]. Wiki Aves - A Enciclopédia das Aves do Brasil.Disponível em: <http://www.wikiaves.com/3410540> Acesso em: 05 Abr 2020.	http://www.wikiaves.com/3410540
Chlorostilbon_lucidus	Callistemon citrinus	Legitimate	Male	yes	Helder Faria	2019-07-24	2019-07-26	Teodoro Sampaio/SP	FARIA, H. H. (2019). [WA3432227, Chlorostilbon lucidus (Shaw, 1812)]. Wiki Aves - A Enciclopédia das Aves do Brasil.Disponível em: <http://www.wikiaves.com/3432227> Acesso em: 05 Abr 2020.	http://www.wikiaves.com/3432227
Chlorostilbon_lucidus	Callistemon citrinus	Legitimate	Male	No	Valéria B. Silva	2019-06-05	2019-06-06	Uberlândia/MG	SILVA, V. B. (2019). [WA3378800, Chlorostilbon lucidus (Shaw, 1812)]. Wiki Aves - A Enciclopédia das Aves do Brasil.Disponível em: <http://www.wikiaves.com/3378800> Acesso em: 05 Abr 2020.	http://www.wikiaves.com/3378800
Chlorostilbon_lucidus	Callistemon citrinus	Legitimate	Female	yes	Andréa Pires	2018-08-10	2018-08-10	Teodoro Sampaio/SP	PIRES, A. S. (2018). [WA3066857, Chlorostilbon lucidus (Shaw, 1812)]. Wiki Aves - A Enciclopédia das Aves do Brasil.Disponível em: <http://www.wikiaves.com/3066857> Acesso em: 05 Abr 2020.	http://www.wikiaves.com/3066857
Chlorostilbon_lucidus	Callistemon citrinus	Legitimate	Male	yes	Fred Crema	2018-07-06	2018-07-12	Sacramento/MG	LEIS, F. C. (2018). [WA3031708, Chlorostilbon lucidus (Shaw, 1812)]. Wiki Aves - A Enciclopédia das Aves do Brasil.Disponível em: <http://www.wikiaves.com/3031708> Acesso em: 05 Abr 2020.	http://www.wikiaves.com/3031708
Chlorostilbon_lucidus	Callistemon citrinus	Legitimate	Female	yes	Aresio Leonel	2017-06-10	2017-06-10	Itu/SP	LEONEL, A. (2017). [WA2584343, Chlorostilbon lucidus (Shaw, 1812)]. Wiki Aves - A Enciclopédia das Aves do Brasil.Disponível em: <http://www.wikiaves.com/2584343> Acesso em: 08 Abr 2020.	http://www.wikiaves.com/2584343
Chlorostilbon_lucidus	Callistemon citrinus	Legitimate	Not determined	yes	Claudio Cesar	2013-10-05	2015-07-28	São Marcos/RS	BOSSARDI, C. C. (2013). [WA1776321, Chlorostilbon lucidus (Shaw, 1812)]. Wiki Aves - A Enciclopédia das Aves do Brasil.Disponível em: <http://www.wikiaves.com/1776321> Acesso em: 09 Abr 2020.	http://www.wikiaves.com/1776321
Chlorostilbon_lucidus	Ceiba speciosa	Legitimate	Male	yes	Miguel B. Lima	2020-02-24	2020-02-27	Paranavaí/PR	LIMA, M. B. (2020). [WA3702449, Chlorostilbon lucidus (Shaw, 1812)]. Wiki Aves - A Enciclopédia das Aves do Brasil.Disponível em: <http://www.wikiaves.com/3702449> Acesso em: 05 Abr 2020.	http://www.wikiaves.com/3702449
Chlorostilbon_lucidus	Celosia argentea	Legitimate	Male	yes	Charlles Macedo	2019-03-31	2019-04-01	Picuí/PB	MACEDO, C. (2019). [WA3319650, Chlorostilbon lucidus (Shaw, 1812)]. Wiki Aves - A Enciclopédia das Aves do Brasil.Disponível em: <http://www.wikiaves.com/3319650> Acesso em: 05 Abr 2020.	http://www.wikiaves.com/3319650
Chlorostilbon_lucidus	Clerodendrum x speciosum	Legitimate	Male	yes	Ivan Rocha	2017-11-27	2017-11-27	Mafra/SC	ROCHA, I. (2017). [WA2796547, Chlorostilbon lucidus (Shaw, 1812)]. Wiki Aves - A Enciclopédia das Aves do Brasil.Disponível em: <http://www.wikiaves.com/2796547> Acesso em: 06 Abr 2020.	http://www.wikiaves.com/2796547
Chlorostilbon_lucidus	Clerodendrum thomsoniae	Legitimate	Female	yes	Andre Maghenzani	2015-12-09	2015-12-10	Monte Alegre do Sul/SP	MAGHENZANI, A. F. (2015). [WA1941359, Chlorostilbon lucidus (Shaw, 1812)]. Wiki Aves - A Enciclopédia das Aves do Brasil.Disponível em: <http://www.wikiaves.com/1941359> Acesso em: 09 Abr 2020.	http://www.wikiaves.com/1941359
Chlorostilbon_lucidus	Erythrina crista-gralli	Legitimate	Male	yes	Ian Thompson	2018-11-02	2018-12-01	Viradouro/SP	THOMPSON, I. (2018). [WA3198951, Chlorostilbon lucidus (Shaw, 1812)]. Wiki Aves - A Enciclopédia das Aves do Brasil.Disponível em: <http://www.wikiaves.com/3198951> Acesso em: 05 Abr 2020.	http://www.wikiaves.com/3198951
Chlorostilbon_lucidus	Erythrina speciosa	Legitimate	Male	yes	Carlos H Carneiro	2018-07-14	2018-07-14	Campinas/SP	CARNEIRO, C. H. (2018). [WA3033769, Chlorostilbon lucidus (Shaw, 1812)]. Wiki Aves - A Enciclopédia das Aves do Brasil.Disponível em: <http://www.wikiaves.com/3033769> Acesso em: 05 Abr 2020.	http://www.wikiaves.com/3033769
Chlorostilbon_lucidus	Euphorbia tithymaloides	Legitimate	Female	yes	Jaelson Gomes	2018-08-21	2018-08-21	Conceição do Coité/BA	GOMES, J. M. (2018). [WA3080902, Chlorostilbon lucidus (Shaw, 1812)]. Wiki Aves - A Enciclopédia das Aves do Brasil.Disponível em: <http://www.wikiaves.com/3080902> Acesso em: 05 Abr 2020.	http://www.wikiaves.com/3080902
Chlorostilbon_lucidus	Fuchsia	Legitimate	Male	yes	Antonio Carlos Iglesias	2019-11-30	2020-03-29	São Bento do Sapucaí/SP	IGLESIAS, A. C. (2019). [WA3737792, Chlorostilbon lucidus (Shaw, 1812)]. Wiki Aves - A Enciclopédia das Aves do Brasil.Disponível em: <http://www.wikiaves.com/3737792> Acesso em: 04 Abr 2020.	http://www.wikiaves.com/3737792
Chlorostilbon_lucidus	Fuchsia	Legitimate	Female	yes	Nicelio Silva	2016-12-26	2017-02-12	Ibitiúra de Minas/MG	SILVA, N. A. (2016). [WA2465903, Chlorostilbon lucidus (Shaw, 1812)]. Wiki Aves - A Enciclopédia das Aves do Brasil.Disponível em: <http://www.wikiaves.com/2465903> Acesso em: 07 Abr 2020.	http://www.wikiaves.com/2465903
Chlorostilbon_lucidus	Grevillea banksii	Legitimate	Male	yes	Antonio Carlos Iglesias	2019-04-12	2019-04-12	São Bento do Sapucaí/SP	IGLESIAS, A. C. (2019). [WA3328241, Chlorostilbon lucidus (Shaw, 1812)]. Wiki Aves - A Enciclopédia das Aves do Brasil.Disponível em: <http://www.wikiaves.com/3328241> Acesso em: 05 Abr 2020.	http://www.wikiaves.com/3328241
Chlorostilbon_lucidus	Grevillea banksii	Legitimate	Male	yes	Antonio Carlos Iglesias	2018-05-24	2018-06-08	São Bento do Sapucaí/SP	IGLESIAS, A. C. (2018). [WA2998132, Chlorostilbon lucidus (Shaw, 1812)]. Wiki Aves - A Enciclopédia das Aves do Brasil.Disponível em: <http://www.wikiaves.com/2998132> Acesso em: 05 Abr 2020.	http://www.wikiaves.com/2998132
Chlorostilbon_lucidus	Grevillea banksii	Legitimate	Male	yes	Thiago Martins	2017-12-22	2017-12-23	Piraju/SP	OLIVEIRA, T. M. (2017). [WA2823192, Chlorostilbon lucidus (Shaw, 1812)]. Wiki Aves - A Enciclopédia das Aves do Brasil.Disponível em: <http://www.wikiaves.com/2823192> Acesso em: 05 Abr 2020.	http://www.wikiaves.com/2823192
Chlorostilbon_lucidus	Grevillea banksii	Legitimate	Female	yes	Pedro Galetti	2017-05-06	2017-05-08	São Carlos/SP	GALETTI, P. (2017). [WA2552099, Chlorostilbon lucidus (Shaw, 1812)]. Wiki Aves - A Enciclopédia das Aves do Brasil.Disponível em: <http://www.wikiaves.com/2552099> Acesso em: 07 Abr 2020.	http://www.wikiaves.com/2552099
Chlorostilbon_lucidus	Grevillea banksii	Legitimate	Male	No	Luís Fernando Stencel	2016-04-15	2016-04-15	Campo Mourão/PR	STENCEL, L. F. (2016). [WA2086123, Chlorostilbon lucidus (Shaw, 1812)]. Wiki Aves - A Enciclopédia das Aves do Brasil.Disponível em: <http://www.wikiaves.com/2086123> Acesso em: 08 Abr 2020.	http://www.wikiaves.com/2086123
Chlorostilbon_lucidus	Grevillea banksii	Legitimate	Female	yes	Leandro Bibiano	2015-08-29	2015-08-29	São José dos Campos/SP	BIBIANO, L. (2015). [WA1814846, Chlorostilbon lucidus (Shaw, 1812)]. Wiki Aves - A Enciclopédia das Aves do Brasil.Disponível em: <http://www.wikiaves.com/1814846> Acesso em: 09 Abr 2020.	http://www.wikiaves.com/1814846
Chlorostilbon_lucidus	Hibiscus	Legitimate	Female	yes	Thiago F. Souza	2015-12-28	2016-01-01	Caconde/SP	SOUZA, T. F. (2015). [WA1966953, Chlorostilbon lucidus (Shaw, 1812)]. Wiki Aves - A Enciclopédia das Aves do Brasil.Disponível em: <http://www.wikiaves.com/1966953> Acesso em: 09 Abr 2020.	http://www.wikiaves.com/1966953
Chlorostilbon_lucidus	Inga	Legitimate	Male	Not determined	Victor Antonelli	2015-10-19	2015-10-19	Botucatu/SP	ANTONELLI, V. (2015). [WA1878366, Chlorostilbon lucidus (Shaw, 1812)]. Wiki Aves - A Enciclopédia das Aves do Brasil.Disponível em: <http://www.wikiaves.com/1878366> Acesso em: 09 Abr 2020.	http://www.wikiaves.com/1878366
Chlorostilbon_lucidus	Inga	Legitimate	Female	Not determined	José V. Paula	2015-04-29	2015-04-29	Cambé/PR	PAULA, J. A. (2015). [WA1678933, Chlorostilbon lucidus (Shaw, 1812)]. Wiki Aves - A Enciclopédia das Aves do Brasil.Disponível em: <http://www.wikiaves.com/1678933> Acesso em: 09 Abr 2020.	http://www.wikiaves.com/1678933
Chlorostilbon_lucidus	Inga	Legitimate	Not determined	Not determined	Aline Patricia Horikawa	2015-08-29	2015-08-29	São Sebastião do Paraíso/MG	HORIKAWA, A. P. (2015). [WA1814805, Chlorostilbon lucidus (Shaw, 1812)]. Wiki Aves - A Enciclopédia das Aves do Brasil.Disponível em: <http://www.wikiaves.com/1814805> Acesso em: 09 Abr 2020.	http://www.wikiaves.com/1814805
Chlorostilbon_lucidus	Ixora coccinea	Legitimate	Female	yes	Emerson Kaseker	2017-06-17	2018-07-30	São José do Rio Pardo/SP	KASEKER, E. P. (2017). [WA3054264, Chlorostilbon lucidus (Shaw, 1812)]. Wiki Aves - A Enciclopédia das Aves do Brasil.Disponível em: <http://www.wikiaves.com/3054264> Acesso em: 06 Abr 2020.	http://www.wikiaves.com/3054264
Chlorostilbon_lucidus	Pentas	Legitimate	Male	yes	Valéria Tonin	2017-01-29	2017-04-07	Limeira/SP	TONIN, V. (2017). [WA2519077, Chlorostilbon lucidus (Shaw, 1812)]. Wiki Aves - A Enciclopédia das Aves do Brasil.Disponível em: <http://www.wikiaves.com/2519077> Acesso em: 07 Abr 2020.	http://www.wikiaves.com/2519077
Chlorostilbon_lucidus	Ixora coccinea	Legitimate	Female	yes	Wagner Santana	2016-04-17	2016-04-18	Aracaju/SE	SANTANA, W. B. (2016). [WA2088278, Chlorostilbon lucidus (Shaw, 1812)]. Wiki Aves - A Enciclopédia das Aves do Brasil.Disponível em: <http://www.wikiaves.com/2088278> Acesso em: 08 Abr 2020.	http://www.wikiaves.com/2088278
Chlorostilbon_lucidus	Justicia brandegeeana	Legitimate	Male	yes	Luis Weymar Jr	2017-09-18	2017-10-05	Pelotas/RS	WEYMAR, L. C. (2017). [WA2723204, Chlorostilbon lucidus (Shaw, 1812)]. Wiki Aves - A Enciclopédia das Aves do Brasil.Disponível em: <http://www.wikiaves.com/2723204> Acesso em: 06 Abr 2020.	http://www.wikiaves.com/2723204
Chlorostilbon_lucidus	Justicia brandegeeana	Legitimate	Not determined	Not determined	Marcelo N. Almeida	2016-08-27	2016-08-28	Valença/RJ	ALMEIDA, M. N. (2016). [WA2254880, Chlorostilbon lucidus (Shaw, 1812)]. Wiki Aves - A Enciclopédia das Aves do Brasil.Disponível em: <http://www.wikiaves.com/2254880> Acesso em: 07 Abr 2020.	http://www.wikiaves.com/2254880
Chlorostilbon_lucidus	Justicia brandegeeana	Legitimate	Female	yes	Mario Soares	2015-10-11	2015-10-12	Nova Odessa/SP	SOARES, M. F. (2015). [WA1867203, Chlorostilbon lucidus (Shaw, 1812)]. Wiki Aves - A Enciclopédia das Aves do Brasil.Disponível em: <http://www.wikiaves.com/1867203> Acesso em: 09 Abr 2020.	http://www.wikiaves.com/1867203
Chlorostilbon_lucidus	Lantana camara	Legitimate	Male	yes	Estêvão Souza	2018-11-18	2020-03-04	Monte Alegre do Sul/SP	SOUZA, E. F. (2018). [WA3709772, Chlorostilbon lucidus (Shaw, 1812)]. Wiki Aves - A Enciclopédia das Aves do Brasil.Disponível em: <http://www.wikiaves.com/3709772> Acesso em: 05 Abr 2020.	http://www.wikiaves.com/3709772
Chlorostilbon_lucidus	Lantana camara	Legitimate	Male	yes	João Victor Pollig	2020-02-23	2020-03-08	São João del Rei/MG	POLLIG, J. V. (2020). [WA3712609, Chlorostilbon lucidus (Shaw, 1812)]. Wiki Aves - A Enciclopédia das Aves do Brasil.Disponível em: <http://www.wikiaves.com/3712609> Acesso em: 05 Abr 2020.	http://www.wikiaves.com/3712609
Chlorostilbon_lucidus	Lantana camara	Legitimate	Male	No	Danilo Melosi	2020-03-01	2020-03-12	Analândia/SP	MELOSI, D. A. (2020). [WA3717094, Chlorostilbon lucidus (Shaw, 1812)]. Wiki Aves - A Enciclopédia das Aves do Brasil.Disponível em: <http://www.wikiaves.com/3717094> Acesso em: 05 Abr 2020.	http://www.wikiaves.com/3717094
Chlorostilbon_lucidus	Lippia sp.	Legitimate	Male	yes	Catarina Tokatjian	2019-06-22	2019-06-30	Pirenópolis/GO	TOKATJIAN, C. (2019). [WA3403166, Chlorostilbon lucidus (Shaw, 1812)]. Wiki Aves - A Enciclopédia das Aves do Brasil.Disponível em: <http://www.wikiaves.com/3403166> Acesso em: 05 Abr 2020.	http://www.wikiaves.com/3403166
Chlorostilbon_lucidus	Lantana camara	Legitimate	Male	yes	Sergio Thess	2018-05-21	2019-09-06	Petrópolis/RJ	THESS, S. P. (2018). [WA3481792, Chlorostilbon lucidus (Shaw, 1812)]. Wiki Aves - A Enciclopédia das Aves do Brasil.Disponível em: <http://www.wikiaves.com/3481792> Acesso em: 05 Abr 2020.	http://www.wikiaves.com/3481792
Chlorostilbon_lucidus	Lantana camara	Legitimate	Male	yes	José Dionísio Bertuzzo	2019-01-11	2019-01-14	Itapira/SP	BERTUZZO, J. D. (2019). [WA3247499, Chlorostilbon lucidus (Shaw, 1812)]. Wiki Aves - A Enciclopédia das Aves do Brasil.Disponível em: <http://www.wikiaves.com/3247499> Acesso em: 05 Abr 2020.	http://www.wikiaves.com/3247499
Chlorostilbon_lucidus	Lantana camara	Legitimate	Female	yes	Mario Soares	2018-12-04	2018-12-04	Rio Claro/SP	SOARES, M. F. (2018). [WA3203077, Chlorostilbon lucidus (Shaw, 1812)]. Wiki Aves - A Enciclopédia das Aves do Brasil.Disponível em: <http://www.wikiaves.com/3203077> Acesso em: 05 Abr 2020.	http://www.wikiaves.com/3203077
Chlorostilbon_lucidus	Lantana camara	Legitimate	Male	yes	Agnaldo Corrêa Assis	2017-12-10	2017-12-25	Bom Despacho/MG	ASSIS, A. C. (2017). [WA3224033, Chlorostilbon lucidus (Shaw, 1812)]. Wiki Aves - A Enciclopédia das Aves do Brasil.Disponível em: <http://www.wikiaves.com/3224033> Acesso em: 05 Abr 2020.	http://www.wikiaves.com/3224033
Chlorostilbon_lucidus	Lantana camara	Legitimate	Male	Not determined	Vitor Oliveira de Rosso	2018-09-07	2018-12-28	Caçapava do Sul/RS	ROSSO, V. O. (2018). [WA3227307, Chlorostilbon lucidus (Shaw, 1812)]. Wiki Aves - A Enciclopédia das Aves do Brasil.Disponível em: <http://www.wikiaves.com/3227307> Acesso em: 05 Abr 2020.	http://www.wikiaves.com/3227307
Chlorostilbon_lucidus	Lantana camara	Legitimate	Male	yes	Marcelo Figueiroa	2018-09-30	2018-09-30	Jundiaí/SP	ANDRADE, L. M. (2018). [WA3129958, Chlorostilbon lucidus (Shaw, 1812)]. Wiki Aves - A Enciclopédia das Aves do Brasil.Disponível em: <http://www.wikiaves.com/3129958> Acesso em: 05 Abr 2020.	http://www.wikiaves.com/3129958
Chlorostilbon_lucidus	Lantana camara	Legitimate	Male	yes	Miguel Angelo Biz	2018-10-21	2018-10-21	Laurentino/SC	BIZ, M. A. (2018). [WA3153630, Chlorostilbon lucidus (Shaw, 1812)]. Wiki Aves - A Enciclopédia das Aves do Brasil.Disponível em: <http://www.wikiaves.com/3153630> Acesso em: 05 Abr 2020.	http://www.wikiaves.com/3153630
Chlorostilbon_lucidus	Lantana camara	Legitimate	Male	yes	Emerson S. Ribeiro	2018-10-27	2018-10-27	Timóteo/MG	RIBEIRO, E. L. (2018). [WA3159309, Chlorostilbon lucidus (Shaw, 1812)]. Wiki Aves - A Enciclopédia das Aves do Brasil.Disponível em: <http://www.wikiaves.com/3159309> Acesso em: 05 Abr 2020.	http://www.wikiaves.com/3159309
Chlorostilbon_lucidus	Lantana camara	Legitimate	Male	yes	Cristiane Bolochio	2018-10-18	2018-10-22	Catas Altas/MG	BOLOCHIO, C. E. (2018). [WA3154434, Chlorostilbon lucidus (Shaw, 1812)]. Wiki Aves - A Enciclopédia das Aves do Brasil.Disponível em: <http://www.wikiaves.com/3154434> Acesso em: 05 Abr 2020.	http://www.wikiaves.com/3154434
Chlorostilbon_lucidus	Lantana camara	Legitimate	Female	yes	Celso Modesto Jr.	2018-10-14	2018-10-18	Rio Claro/SP	MODESTO, C. C. (2018). [WA3150481, Chlorostilbon lucidus (Shaw, 1812)]. Wiki Aves - A Enciclopédia das Aves do Brasil.Disponível em: <http://www.wikiaves.com/3150481> Acesso em: 05 Abr 2020.	http://www.wikiaves.com/3150481
Chlorostilbon_lucidus	Lantana camara	Legitimate	Female	yes	Joseane Guimarães	2018-10-21	2018-10-23	São Lourenço/MG	QUIRINO, J. G. (2018). [WA3156018, Chlorostilbon lucidus (Shaw, 1812)]. Wiki Aves - A Enciclopédia das Aves do Brasil.Disponível em: <http://www.wikiaves.com/3156018> Acesso em: 05 Abr 2020.	http://www.wikiaves.com/3156018
Chlorostilbon_lucidus	Lantana camara	Legitimate	Male	yes	Carlos Moura	2018-08-10	2018-08-11	Itapevi/SP	MOURA, C. A. (2018). [WA3067571, Chlorostilbon lucidus (Shaw, 1812)]. Wiki Aves - A Enciclopédia das Aves do Brasil.Disponível em: <http://www.wikiaves.com/3067571> Acesso em: 05 Abr 2020.	http://www.wikiaves.com/3067571
Chlorostilbon_lucidus	Lippia sp.	Legitimate	Male	yes	Rogério de Castro	2018-06-30	2018-07-01	Cocalzinho de Goiás/GO	CASTRO, R. (2018). [WA3019067, Chlorostilbon lucidus (Shaw, 1812)]. Wiki Aves - A Enciclopédia das Aves do Brasil.Disponível em: <http://www.wikiaves.com/3019067> Acesso em: 05 Abr 2020.	http://www.wikiaves.com/3019067
Chlorostilbon_lucidus	Lantana camara	Legitimate	Male	yes	Davi Oliveira	2018-06-16	2018-06-25	Caputira/MG	OLIVEIRA, D. C. (2018). [WA3014058, Chlorostilbon lucidus (Shaw, 1812)]. Wiki Aves - A Enciclopédia das Aves do Brasil.Disponível em: <http://www.wikiaves.com/3014058> Acesso em: 05 Abr 2020.	http://www.wikiaves.com/3014058
Chlorostilbon_lucidus	Lantana camara	Legitimate	Male	yes	Laís Belmino Regis	2017-12-04	2018-01-23	Limoeiro do Norte/CE	REGIS, L. B. (2017). [WA2858087, Chlorostilbon lucidus (Shaw, 1812)]. Wiki Aves - A Enciclopédia das Aves do Brasil.Disponível em: <http://www.wikiaves.com/2858087> Acesso em: 05 Abr 2020.	http://www.wikiaves.com/2858087
Chlorostilbon_lucidus	Lantana camara	Legitimate	Female	yes	Rildo Silveira	2017-10-08	2017-10-08	Cruzília/MG	SILVEIRA, R. (2017). [WA2727912, Chlorostilbon lucidus (Shaw, 1812)]. Wiki Aves - A Enciclopédia das Aves do Brasil.Disponível em: <http://www.wikiaves.com/2727912> Acesso em: 06 Abr 2020.	http://www.wikiaves.com/2727912
Chlorostilbon_lucidus	Lantana camara	Legitimate	Male	yes	Leandro Augusto	2017-10-10	2017-10-16	Curitiba/PR	AUGUSTO, L. (2017). [WA2738080, Chlorostilbon lucidus (Shaw, 1812)]. Wiki Aves - A Enciclopédia das Aves do Brasil.Disponível em: <http://www.wikiaves.com/2738080> Acesso em: 06 Abr 2020.	http://www.wikiaves.com/2738080
Chlorostilbon_lucidus	Lantana camara	Legitimate	Female	yes	Thiago Bonato Carvalhido	2017-09-30	2017-10-02	Cachoeiro de Itapemirim/ES	CARVALHIDO, T. B. (2017). [WA2719463, Chlorostilbon lucidus (Shaw, 1812)]. Wiki Aves - A Enciclopédia das Aves do Brasil.Disponível em: <http://www.wikiaves.com/2719463> Acesso em: 06 Abr 2020.	http://www.wikiaves.com/2719463
Chlorostilbon_lucidus	Lantana camara	Legitimate	Female	yes	Silmark Araújo	2017-07-21	2017-07-24	Senhora dos Remédios/MG	ARAÚJO, S. (2017). [WA2633333, Chlorostilbon lucidus (Shaw, 1812)]. Wiki Aves - A Enciclopédia das Aves do Brasil.Disponível em: <http://www.wikiaves.com/2633333> Acesso em: 07 Abr 2020.	http://www.wikiaves.com/2633333
Chlorostilbon_lucidus	Lantana camara	Legitimate	Female	yes	Victor Leandro-Silva	2017-01-20	2017-01-24	Jaqueira/PE	LEANDRO-SILVA, V. (2017). [WA2445889, Chlorostilbon lucidus (Shaw, 1812)]. Wiki Aves - A Enciclopédia das Aves do Brasil.Disponível em: <http://www.wikiaves.com/2445889> Acesso em: 07 Abr 2020.	http://www.wikiaves.com/2445889
Chlorostilbon_lucidus	Lantana camara	Legitimate	Male	yes	Ademir Carletti	2017-04-23	2017-06-05	São José do Calçado/ES	CARLETTI, A. (2017). [WA2579562, Chlorostilbon lucidus (Shaw, 1812)]. Wiki Aves - A Enciclopédia das Aves do Brasil.Disponível em: <http://www.wikiaves.com/2579562> Acesso em: 07 Abr 2020.	http://www.wikiaves.com/2579562
Chlorostilbon_lucidus	Lantana camara	Legitimate	Male	yes	Edu Martins	2016-11-09	2016-12-12	Socorro/SP	MARTINS, J. E. (2016). [WA2397855, Chlorostilbon lucidus (Shaw, 1812)]. Wiki Aves - A Enciclopédia das Aves do Brasil.Disponível em: <http://www.wikiaves.com/2397855> Acesso em: 07 Abr 2020.	http://www.wikiaves.com/2397855
Chlorostilbon_lucidus	Lantana camara	Legitimate	Male	yes	Dirce Freitas	2016-09-25	2016-10-04	Bonito/MS	FREITAS, D. M. (2016). [WA2309104, Chlorostilbon lucidus (Shaw, 1812)]. Wiki Aves - A Enciclopédia das Aves do Brasil.Disponível em: <http://www.wikiaves.com/2309104> Acesso em: 07 Abr 2020.	http://www.wikiaves.com/2309104
Chlorostilbon_lucidus	Lantana camara	Legitimate	Female	yes	Leandro Augusto	2016-11-11	2016-11-11	Curitiba/PR	AUGUSTO, L. (2016). [WA2361773, Chlorostilbon lucidus (Shaw, 1812)]. Wiki Aves - A Enciclopédia das Aves do Brasil.Disponível em: <http://www.wikiaves.com/2361773> Acesso em: 07 Abr 2020.	http://www.wikiaves.com/2361773
Chlorostilbon_lucidus	Lantana camara	Legitimate	Male	yes	Márcio R. Campêlo	2015-11-01	2016-10-16	Atalaia/AL	CAMPÊLO, M. J. (2015). [WA2324416, Chlorostilbon lucidus (Shaw, 1812)]. Wiki Aves - A Enciclopédia das Aves do Brasil.Disponível em: <http://www.wikiaves.com/2324416> Acesso em: 07 Abr 2020.	http://www.wikiaves.com/2324416
Chlorostilbon_lucidus	Lantana camara	Legitimate	Male	yes	Marcos Amend	2016-12-10	2016-12-19	Lagoa Santa/MG	AMEND, M. (2016). [WA2405541, Chlorostilbon lucidus (Shaw, 1812)]. Wiki Aves - A Enciclopédia das Aves do Brasil.Disponível em: <http://www.wikiaves.com/2405541> Acesso em: 07 Abr 2020.	http://www.wikiaves.com/2405541
Chlorostilbon_lucidus	Lantana camara	Legitimate	Not determined	yes	Fabiana Pascoaline	2016-09-17	2016-09-18	Caratinga/MG	PASCOALINE, F. A. (2016). [WA2285313, Chlorostilbon lucidus (Shaw, 1812)]. Wiki Aves - A Enciclopédia das Aves do Brasil.Disponível em: <http://www.wikiaves.com/2285313> Acesso em: 07 Abr 2020.	http://www.wikiaves.com/2285313
Chlorostilbon_lucidus	Lantana camara	Legitimate	Female	yes	Nathalia de Melo	2016-09-20	2016-09-22	Limeira/SP	MELO, N. (2016). [WA2291068, Chlorostilbon lucidus (Shaw, 1812)]. Wiki Aves - A Enciclopédia das Aves do Brasil.Disponível em: <http://www.wikiaves.com/2291068> Acesso em: 07 Abr 2020.	http://www.wikiaves.com/2291068
Chlorostilbon_lucidus	Lantana camara	Legitimate	Female	yes	Leandro Augusto	2017-03-27	2017-03-27	Curitiba/PR	AUGUSTO, L. (2017). [WA2507905, Chlorostilbon lucidus (Shaw, 1812)]. Wiki Aves - A Enciclopédia das Aves do Brasil.Disponível em: <http://www.wikiaves.com/2507905> Acesso em: 08 Abr 2020.	http://www.wikiaves.com/2507905
Chlorostilbon_lucidus	Lantana camara	Legitimate	Male	yes	Avelino V. Nt.	2014-11-12	2016-04-29	Dom Pedrito/RS	NT., A. V. (2014). [WA2101004, Chlorostilbon lucidus (Shaw, 1812)]. Wiki Aves - A Enciclopédia das Aves do Brasil.Disponível em: <http://www.wikiaves.com/2101004> Acesso em: 08 Abr 2020.	http://www.wikiaves.com/2101004
Chlorostilbon_lucidus	Lantana camara	Legitimate	Female	yes	Roberto Gonçalves	2016-03-27	2016-03-27	Lençóis/BA	GONÇALVES, R. C. (2016). [WA2066812, Chlorostilbon lucidus (Shaw, 1812)]. Wiki Aves - A Enciclopédia das Aves do Brasil.Disponível em: <http://www.wikiaves.com/2066812> Acesso em: 08 Abr 2020.	http://www.wikiaves.com/2066812
Chlorostilbon_lucidus	Lavandula angustifolia	Legitimate	Female	yes	Oscar Morales	2017-12-03	2018-01-10	Gonçalves/MG	MORALES, O. (2017). [WA2842259, Chlorostilbon lucidus (Shaw, 1812)]. Wiki Aves - A Enciclopédia das Aves do Brasil.Disponível em: <http://www.wikiaves.com/2842259> Acesso em: 05 Abr 2020.	http://www.wikiaves.com/2842259
Chlorostilbon_lucidus	Leonotis nepetifolia	Legitimate	Male	yes	Luiz Motta	2019-06-22	2019-06-23	Cocalzinho de Goiás/GO	MOTTA, L. G. (2019). [WA3395859, Chlorostilbon lucidus (Shaw, 1812)]. Wiki Aves - A Enciclopédia das Aves do Brasil.Disponível em: <http://www.wikiaves.com/3395859> Acesso em: 05 Abr 2020.	http://www.wikiaves.com/3395859
Chlorostilbon_lucidus	Callistemon	Legitimate	Male	yes	Carlos Santos 3	2019-07-28	2019-07-28	Martinho Campos/MG	SANTOS, C. A. (2019). [WA3435308, Chlorostilbon lucidus (Shaw, 1812)]. Wiki Aves - A Enciclopédia das Aves do Brasil.Disponível em: <http://www.wikiaves.com/3435308> Acesso em: 05 Abr 2020.	http://www.wikiaves.com/3435308
Chlorostilbon_lucidus	Leonotis nepetifolia	Legitimate	Male	yes	Pedro Luís Tomasulo	2015-11-02	2019-07-26	Jacareí/SP	TOMASULO, P. L. (2015). [WA3432000, Chlorostilbon lucidus (Shaw, 1812)]. Wiki Aves - A Enciclopédia das Aves do Brasil.Disponível em: <http://www.wikiaves.com/3432000> Acesso em: 05 Abr 2020.	http://www.wikiaves.com/3432000
Chlorostilbon_lucidus	Leonotis nepetifolia	Legitimate	Male	yes	Catarina Tokatjian	2017-07-23	2018-06-09	Cocalzinho de Goiás/GO	TOKATJIAN, C. (2017). [WA2998989, Chlorostilbon lucidus (Shaw, 1812)]. Wiki Aves - A Enciclopédia das Aves do Brasil.Disponível em: <http://www.wikiaves.com/2998989> Acesso em: 05 Abr 2020.	http://www.wikiaves.com/2998989
Chlorostilbon_lucidus	Leonotis nepetifolia	Legitimate	Male	No	Vagner Cotrim	2018-01-10	2018-01-19	Colina/SP	COTRIM, V. M. (2018). [WA2853426, Chlorostilbon lucidus (Shaw, 1812)]. Wiki Aves - A Enciclopédia das Aves do Brasil.Disponível em: <http://www.wikiaves.com/2853426> Acesso em: 05 Abr 2020.	http://www.wikiaves.com/2853426
Chlorostilbon_lucidus	Leonotis nepetifolia	Legitimate	Male	yes	Hilton Oliveira	2017-11-19	2017-12-15	Potengi/CE	OLIVEIRA, H. M. (2017). [WA2815884, Chlorostilbon lucidus (Shaw, 1812)]. Wiki Aves - A Enciclopédia das Aves do Brasil.Disponível em: <http://www.wikiaves.com/2815884> Acesso em: 05 Abr 2020.	http://www.wikiaves.com/2815884
Chlorostilbon_lucidus	Leonotis nepetifolia	Legitimate	Male	yes	Zé Campos	2016-02-21	2016-02-21	Lavras/MG	CAMPOS, J. E. (2016). [WA2030155, Chlorostilbon lucidus (Shaw, 1812)]. Wiki Aves - A Enciclopédia das Aves do Brasil.Disponível em: <http://www.wikiaves.com/2030155> Acesso em: 08 Abr 2020.	http://www.wikiaves.com/2030155
Chlorostilbon_lucidus	Leonotis nepetifolia	Legitimate	Male	yes	Cairo Henrique Gonçalves	2016-01-25	2016-01-27	Alfenas/MG	GONÇALVES, C. H. (2016). [WA2001237, Chlorostilbon lucidus (Shaw, 1812)]. Wiki Aves - A Enciclopédia das Aves do Brasil.Disponível em: <http://www.wikiaves.com/2001237> Acesso em: 09 Abr 2020.	http://www.wikiaves.com/2001237
Chlorostilbon_lucidus	Leonotis nepetifolia	Legitimate	Female	yes	Sebastião Guerra	2015-09-19	2015-10-07	Maringá/PR	GUERRA, S. P. (2015). [WA1862297, Chlorostilbon lucidus (Shaw, 1812)]. Wiki Aves - A Enciclopédia das Aves do Brasil.Disponível em: <http://www.wikiaves.com/1862297> Acesso em: 09 Abr 2020.	http://www.wikiaves.com/1862297
Chlorostilbon_lucidus	Leonotis nepetifolia	Legitimate	Not determined	Not determined	Claudia Moura	2014-07-21	2015-04-23	Chapada dos Guimarães/MT	BENITA (2014). [WA1673220, Chlorostilbon lucidus (Shaw, 1812)]. Wiki Aves - A Enciclopédia das Aves do Brasil.Disponível em: <http://www.wikiaves.com/1673220> Acesso em: 09 Abr 2020.	http://www.wikiaves.com/1673220
Chlorostilbon_lucidus	Megaskepasma erythrochlamys	Legitimate	Female	yes	Camila	2016-03-20	2016-04-06	Torrinha/SP	CULTRI, C. N. (2016). [WA2077066, Chlorostilbon lucidus (Shaw, 1812)]. Wiki Aves - A Enciclopédia das Aves do Brasil.Disponível em: <http://www.wikiaves.com/2077066> Acesso em: 09 Abr 2020.	http://www.wikiaves.com/2077066
Chlorostilbon_lucidus	Melocactus sp.	Legitimate	Female	Not determined	Almir Neves	2019-03-16	2019-03-16	Santa Cruz do Capibaribe/PE	ARAUJO, A. D. (2019). [WA3305882, Chlorostilbon lucidus (Shaw, 1812)]. Wiki Aves - A Enciclopédia das Aves do Brasil.Disponível em: <http://www.wikiaves.com/3305882> Acesso em: 05 Abr 2020.	http://www.wikiaves.com/3305882
Chlorostilbon_lucidus	Melocactus sp.	Legitimate	Female	yes	Arnon Borges	2019-01-18	2019-02-18	Caatiba/BA	BORGES, A. C. (2019). [WA3284370, Chlorostilbon lucidus (Shaw, 1812)]. Wiki Aves - A Enciclopédia das Aves do Brasil.Disponível em: <http://www.wikiaves.com/3284370> Acesso em: 05 Abr 2020.	http://www.wikiaves.com/3284370
Chlorostilbon_lucidus	Melocactus sp.	Legitimate	Male	yes	Julio Machado	2018-11-07	2018-11-30	Potengi/CE	MACHADO, J. C. (2018). [WA3198533, Chlorostilbon lucidus (Shaw, 1812)]. Wiki Aves - A Enciclopédia das Aves do Brasil.Disponível em: <http://www.wikiaves.com/3198533> Acesso em: 05 Abr 2020.	http://www.wikiaves.com/3198533
Chlorostilbon_lucidus	Melocactus sp.	Legitimate	Female	yes	Alenilson Rodrigues	2018-04-22	2018-04-24	Delmiro Gouveia/AL	PEREIRA, A. R. (2018). [WA2950993, Chlorostilbon lucidus (Shaw, 1812)]. Wiki Aves - A Enciclopédia das Aves do Brasil.Disponível em: <http://www.wikiaves.com/2950993> Acesso em: 05 Abr 2020.	http://www.wikiaves.com/2950993
Chlorostilbon_lucidus	Melocactus sp.	Legitimate	Female	yes	Luiz Gonzaga	2018-04-02	2018-04-02	Parelhas/RN	GONZAGA, L. (2018). [WA2929725, Chlorostilbon lucidus (Shaw, 1812)]. Wiki Aves - A Enciclopédia das Aves do Brasil.Disponível em: <http://www.wikiaves.com/2929725> Acesso em: 05 Abr 2020.	http://www.wikiaves.com/2929725
Chlorostilbon_lucidus	Melocactus sp.	Legitimate	Female	yes	Ícaro Sena	2018-02-18	2018-02-23	Boa Nova/BA	SENA, I. (2018). [WA2894419, Chlorostilbon lucidus (Shaw, 1812)]. Wiki Aves - A Enciclopédia das Aves do Brasil.Disponível em: <http://www.wikiaves.com/2894419> Acesso em: 05 Abr 2020.	http://www.wikiaves.com/2894419
Chlorostilbon_lucidus	Melocactus sp.	Legitimate	Female	yes	Isaac Libório	2017-11-24	2018-02-13	Venturosa/PE	ROCHA, I. L. (2017). [WA2882274, Chlorostilbon lucidus (Shaw, 1812)]. Wiki Aves - A Enciclopédia das Aves do Brasil.Disponível em: <http://www.wikiaves.com/2882274> Acesso em: 05 Abr 2020.	http://www.wikiaves.com/2882274
Chlorostilbon_lucidus	Melocactus sp.	Legitimate	Male	yes	Susana Coppede	2017-08-17	2017-08-18	Potengi/CE	COPPEDE, S. A. (2017). [WA2742098, Chlorostilbon lucidus (Shaw, 1812)]. Wiki Aves - A Enciclopédia das Aves do Brasil.Disponível em: <http://www.wikiaves.com/2742098> Acesso em: 06 Abr 2020.	http://www.wikiaves.com/2742098
Chlorostilbon_lucidus	Melocactus sp.	Legitimate	Female	yes	Almir Neves	2017-06-05	2017-06-05	Santa Cruz do Capibaribe/PE	ARAUJO, A. D. (2017). [WA2579687, Chlorostilbon lucidus (Shaw, 1812)]. Wiki Aves - A Enciclopédia das Aves do Brasil.Disponível em: <http://www.wikiaves.com/2579687> Acesso em: 07 Abr 2020.	http://www.wikiaves.com/2579687
Chlorostilbon_lucidus	Melocactus sp.	Legitimate	Male	yes	Jose N. Junior	2016-10-30	2017-01-29	Ribeira do Pombal/BA	NASCIMENTO, J. M. (2016). [WA2450625, Chlorostilbon lucidus (Shaw, 1812)]. Wiki Aves - A Enciclopédia das Aves do Brasil.Disponível em: <http://www.wikiaves.com/2450625> Acesso em: 07 Abr 2020.	http://www.wikiaves.com/2450625
Chlorostilbon_lucidus	Melocactus sp.	Legitimate	Female	yes	Olívia Suzuki	2013-07-13	2016-06-29	Curaçá/BA	CARVALHO, O. S. (2013). [WA2171384, Chlorostilbon lucidus (Shaw, 1812)]. Wiki Aves - A Enciclopédia das Aves do Brasil.Disponível em: <http://www.wikiaves.com/2171384> Acesso em: 08 Abr 2020.	http://www.wikiaves.com/2171384
Chlorostilbon_lucidus	Coleus barbatus	Legitimate	Male	yes	Carlos Joos	2015-07-09	2016-07-01	Pirassununga/SP	JOOS, C. E. (2015). [WA2177039, Chlorostilbon lucidus (Shaw, 1812)]. Wiki Aves - A Enciclopédia das Aves do Brasil.Disponível em: <http://www.wikiaves.com/2177039> Acesso em: 08 Abr 2020.	http://www.wikiaves.com/2177039
Chlorostilbon_lucidus	Melocactus sp.	Legitimate	Male	yes	Hideko Helena Okita	2016-03-27	2016-06-06	Canudos/BA	OKITA, H. H. (2016). [WA2147578, Chlorostilbon lucidus (Shaw, 1812)]. Wiki Aves - A Enciclopédia das Aves do Brasil.Disponível em: <http://www.wikiaves.com/2147578> Acesso em: 08 Abr 2020.	http://www.wikiaves.com/2147578
Chlorostilbon_lucidus	Melocactus sp.	Legitimate	Female	yes	Luiz Gonzaga	2016-03-03	2016-04-20	Parelhas/RN	GONZAGA, L. (2016). [WA2090604, Chlorostilbon lucidus (Shaw, 1812)]. Wiki Aves - A Enciclopédia das Aves do Brasil.Disponível em: <http://www.wikiaves.com/2090604> Acesso em: 08 Abr 2020.	http://www.wikiaves.com/2090604
Chlorostilbon_lucidus	Melocactus sp.	Legitimate	Female	yes	Helberth Peixoto	2016-04-02	2016-05-23	Boa Nova/BA	PEIXOTO, H. J. (2016). [WA2128293, Chlorostilbon lucidus (Shaw, 1812)]. Wiki Aves - A Enciclopédia das Aves do Brasil.Disponível em: <http://www.wikiaves.com/2128293> Acesso em: 08 Abr 2020.	http://www.wikiaves.com/2128293
Chlorostilbon_lucidus	Melocactus sp.	Legitimate	Male	yes	Allisson Cafeseiro	2015-12-26	2016-01-08	Boa Nova/BA	DIAS, A. C. (2015). [WA1976868, Chlorostilbon lucidus (Shaw, 1812)]. Wiki Aves - A Enciclopédia das Aves do Brasil.Disponível em: <http://www.wikiaves.com/1976868> Acesso em: 09 Abr 2020.	http://www.wikiaves.com/1976868
Chlorostilbon_lucidus	Melocactus sp.	Legitimate	Male	yes	Bertrando Campos	2014-11-03	2014-11-30	Canudos/BA	CAMPOS, B. (2014). [WA1532549, Chlorostilbon lucidus (Shaw, 1812)]. Wiki Aves - A Enciclopédia das Aves do Brasil.Disponível em: <http://www.wikiaves.com/1532549> Acesso em: 09 Abr 2020.	http://www.wikiaves.com/1532549
Chlorostilbon_lucidus	Odontomena	Legitimate	Female	yes	Marcia Koch Rodrigues	2020-02-09	2020-03-17	Santo Ângelo/RS	RODRIGUES, M. K. (2020). [WA3722277, Chlorostilbon lucidus (Shaw, 1812)]. Wiki Aves - A Enciclopédia das Aves do Brasil.Disponível em: <http://www.wikiaves.com/3722277> Acesso em: 05 Abr 2020.	http://www.wikiaves.com/3722277
Chlorostilbon_lucidus	Odontomena	Legitimate	Female	yes	Mauro Schramm	2017-04-26	2018-05-06	Jardim/MS	SCHRAMM, M. (2017). [WA2964605, Chlorostilbon lucidus (Shaw, 1812)]. Wiki Aves - A Enciclopédia das Aves do Brasil.Disponível em: <http://www.wikiaves.com/2964605> Acesso em: 05 Abr 2020.	http://www.wikiaves.com/2964605
Chlorostilbon_lucidus	Odontomena	Legitimate	Male	yes	Fernanda Trevizan	2018-05-05	2018-05-23	Jardim/MS	TREVIZAN, F. K. (2018). [WA2980474, Chlorostilbon lucidus (Shaw, 1812)]. Wiki Aves - A Enciclopédia das Aves do Brasil.Disponível em: <http://www.wikiaves.com/2980474> Acesso em: 05 Abr 2020.	http://www.wikiaves.com/2980474
Chlorostilbon_lucidus	Odontomena	Legitimate	Male	yes	Ricardo Barbosa 2	2018-02-25	2018-02-25	Tietê/SP	BARBOSA, R. (2018). [WA2896721, Chlorostilbon lucidus (Shaw, 1812)]. Wiki Aves - A Enciclopédia das Aves do Brasil.Disponível em: <http://www.wikiaves.com/2896721> Acesso em: 05 Abr 2020.	http://www.wikiaves.com/2896721
Chlorostilbon_lucidus	Odontomena	Legitimate	Female	yes	Antonio Vilela	2017-02-12	2017-02-12	Tietê/SP	VILELA, A. R. (2017). [WA2465750, Chlorostilbon lucidus (Shaw, 1812)]. Wiki Aves - A Enciclopédia das Aves do Brasil.Disponível em: <http://www.wikiaves.com/2465750> Acesso em: 07 Abr 2020.	http://www.wikiaves.com/2465750
Chlorostilbon_lucidus	Odontomena	Legitimate	Female	Not determined	Eduardo Werner	2016-04-13	2016-04-13	Bom Princípio/RS	WERNER, E. (2016). [WA2084169, Chlorostilbon lucidus (Shaw, 1812)]. Wiki Aves - A Enciclopédia das Aves do Brasil.Disponível em: <http://www.wikiaves.com/2084169> Acesso em: 08 Abr 2020.	http://www.wikiaves.com/2084169
Chlorostilbon_lucidus	Opuntia	Legitimate	Female	yes	Robério Aires	2017-11-09	2017-11-09	Pocinhos/PB	AIRES, J. R. (2017). [WA2772953, Chlorostilbon lucidus (Shaw, 1812)]. Wiki Aves - A Enciclopédia das Aves do Brasil.Disponível em: <http://www.wikiaves.com/2772953> Acesso em: 06 Abr 2020.	http://www.wikiaves.com/2772953
Chlorostilbon_lucidus	Pachystachys lutea	Legitimate	Not determined	yes	Luiz H. Santos	2019-03-09	2019-03-11	Cianorte/PR	SANTOS, L. H. (2019). [WA3302522, Chlorostilbon lucidus (Shaw, 1812)]. Wiki Aves - A Enciclopédia das Aves do Brasil.Disponível em: <http://www.wikiaves.com/3302522> Acesso em: 05 Abr 2020.	http://www.wikiaves.com/3302522
Chlorostilbon_lucidus	Pachystachys lutea	Legitimate	Female	yes	Adalberto Bertolazzi	2016-01-01	2016-01-01	Rio das Pedras/SP	BERTOLAZZI, A. A. (2016). [WA1966851, Chlorostilbon lucidus (Shaw, 1812)]. Wiki Aves - A Enciclopédia das Aves do Brasil.Disponível em: <http://www.wikiaves.com/1966851> Acesso em: 09 Abr 2020.	http://www.wikiaves.com/1966851
Chlorostilbon_lucidus	Coleus barbatus	Legitimate	Male	yes	André Pellanda	2019-07-29	2019-07-31	Divino de São Lourenço/ES	SOUZA, A. P. (2019). [WA3439350, Chlorostilbon lucidus (Shaw, 1812)]. Wiki Aves - A Enciclopédia das Aves do Brasil.Disponível em: <http://www.wikiaves.com/3439350> Acesso em: 05 Abr 2020.	http://www.wikiaves.com/3439350
Chlorostilbon_lucidus	Coleus barbatus	Legitimate	Female	yes	Agostinho Almeida	2016-12-07	2016-12-07	Sorocaba/SP	ALMEIDA, A. J. (2016). [WA2393239, Chlorostilbon lucidus (Shaw, 1812)]. Wiki Aves - A Enciclopédia das Aves do Brasil.Disponível em: <http://www.wikiaves.com/2393239> Acesso em: 07 Abr 2020.	http://www.wikiaves.com/2393239
Chlorostilbon_lucidus	Coleus barbatus	Legitimate	Male	yes	Paulo Bruno Nunes	2016-08-10	2016-08-12	Aguiar/PB	NUNES, P. B. (2016). [WA2232757, Chlorostilbon lucidus (Shaw, 1812)]. Wiki Aves - A Enciclopédia das Aves do Brasil.Disponível em: <http://www.wikiaves.com/2232757> Acesso em: 07 Abr 2020.	http://www.wikiaves.com/2232757
Chlorostilbon_lucidus	Coleus barbatus	Legitimate	Male	yes	Dáfini Bruno	2016-05-27	2016-05-28	Mogi Mirim/SP	BRUNO, D. (2016). [WA2134349, Chlorostilbon lucidus (Shaw, 1812)]. Wiki Aves - A Enciclopédia das Aves do Brasil.Disponível em: <http://www.wikiaves.com/2134349> Acesso em: 08 Abr 2020.	http://www.wikiaves.com/2134349
Chlorostilbon_lucidus	Coleus barbatus	Legitimate	Male	yes	Clélio Junior	2016-03-26	2016-04-05	Espera Feliz/MG	LIMA, C. S. (2016). [WA2076473, Chlorostilbon lucidus (Shaw, 1812)]. Wiki Aves - A Enciclopédia das Aves do Brasil.Disponível em: <http://www.wikiaves.com/2076473> Acesso em: 08 Abr 2020.	http://www.wikiaves.com/2076473
Chlorostilbon_lucidus	Coleus barbatus	Legitimate	Female	yes	Paulo Bruno Nunes	2015-10-14	2015-10-16	Aguiar/PB	NUNES, P. B. (2015). [WA1873320, Chlorostilbon lucidus (Shaw, 1812)]. Wiki Aves - A Enciclopédia das Aves do Brasil.Disponível em: <http://www.wikiaves.com/1873320> Acesso em: 09 Abr 2020.	http://www.wikiaves.com/1873320
Chlorostilbon_lucidus	Coleus barbatus	Legitimate	Male	yes	Leopoldo Pivovar Plotecya	2015-09-27	2015-09-29	Santa Teresa/ES	PLOTECYA, L. P. (2015). [WA1853519, Chlorostilbon lucidus (Shaw, 1812)]. Wiki Aves - A Enciclopédia das Aves do Brasil.Disponível em: <http://www.wikiaves.com/1853519> Acesso em: 09 Abr 2020.	http://www.wikiaves.com/1853519
Chlorostilbon_lucidus	Luetzelburgia	Legitimate	Male	yes	Alexandre Callou Sampaio	2009-08-20	2018-01-16	Barbalha/CE	SAMPAIO, A. C. (2009). [WA2849866, Chlorostilbon lucidus (Shaw, 1812)]. Wiki Aves - A Enciclopédia das Aves do Brasil.Disponível em: <http://www.wikiaves.com/2849866> Acesso em: 05 Abr 2020.	http://www.wikiaves.com/2849866
Chlorostilbon_lucidus	Russelia equisetiformis	Legitimate	Male	yes	Rogério de Castro	2019-05-01	2019-05-02	Brasília/DF	CASTRO, R. (2019). [WA3346115, Chlorostilbon lucidus (Shaw, 1812)]. Wiki Aves - A Enciclopédia das Aves do Brasil.Disponível em: <http://www.wikiaves.com/3346115> Acesso em: 05 Abr 2020.	http://www.wikiaves.com/3346115
Chlorostilbon_lucidus	Russelia equisetiformis	Legitimate	Female	yes	Gabriel Tirintan	2019-01-18	2019-01-22	Ladário/MS	LIMA, G. T. (2019). [WA3257411, Chlorostilbon lucidus (Shaw, 1812)]. Wiki Aves - A Enciclopédia das Aves do Brasil.Disponível em: <http://www.wikiaves.com/3257411> Acesso em: 05 Abr 2020.	http://www.wikiaves.com/3257411
Chlorostilbon_lucidus	Russelia equisetiformis	Legitimate	Female	yes	Antonio Vilela	2018-12-08	2018-12-08	Tietê/SP	VILELA, A. R. (2018). [WA3206128, Chlorostilbon lucidus (Shaw, 1812)]. Wiki Aves - A Enciclopédia das Aves do Brasil.Disponível em: <http://www.wikiaves.com/3206128> Acesso em: 05 Abr 2020.	http://www.wikiaves.com/3206128
Chlorostilbon_lucidus	Russelia equisetiformis	Legitimate	Female	yes	Luiz Rondini	2018-12-14	2018-12-14	São Paulo/SP	RONDINI, L. C. (2018). [WA3212167, Chlorostilbon lucidus (Shaw, 1812)]. Wiki Aves - A Enciclopédia das Aves do Brasil.Disponível em: <http://www.wikiaves.com/3212167> Acesso em: 05 Abr 2020.	http://www.wikiaves.com/3212167
Chlorostilbon_lucidus	Russelia equisetiformis	Legitimate	Male	yes	Luiz Vasconcelos	2018-08-12	2018-08-12	Nova Lima/MG	VASCONCELOS, L. A. (2018). [WA3069178, Chlorostilbon lucidus (Shaw, 1812)]. Wiki Aves - A Enciclopédia das Aves do Brasil.Disponível em: <http://www.wikiaves.com/3069178> Acesso em: 05 Abr 2020.	http://www.wikiaves.com/3069178
Chlorostilbon_lucidus	Russelia equisetiformis	Legitimate	Male	yes	Alenilson Rodrigues	2018-07-09	2018-07-10	Olho d'Água das Flores/AL	PEREIRA, A. R. (2018). [WA3029944, Chlorostilbon lucidus (Shaw, 1812)]. Wiki Aves - A Enciclopédia das Aves do Brasil.Disponível em: <http://www.wikiaves.com/3029944> Acesso em: 05 Abr 2020.	http://www.wikiaves.com/3029944
Chlorostilbon_lucidus	Russelia equisetiformis	Legitimate	Male	yes	Mansueto Souza	2017-12-05	2017-12-07	Ipatinga/MG	SOUZA, J. M. (2017). [WA2808114, Chlorostilbon lucidus (Shaw, 1812)]. Wiki Aves - A Enciclopédia das Aves do Brasil.Disponível em: <http://www.wikiaves.com/2808114> Acesso em: 06 Abr 2020.	http://www.wikiaves.com/2808114
Chlorostilbon_lucidus	Russelia equisetiformis	Legitimate	Male	yes	Helena Backes	2017-11-11	2017-11-23	Tiradentes/MG	BACKES, H. (2017). [WA2787766, Chlorostilbon lucidus (Shaw, 1812)]. Wiki Aves - A Enciclopédia das Aves do Brasil.Disponível em: <http://www.wikiaves.com/2787766> Acesso em: 06 Abr 2020.	http://www.wikiaves.com/2787766
Chlorostilbon_lucidus	Russelia equisetiformis	Legitimate	Female	yes	Adaltro Zorzan	2016-11-06	2016-11-06	Ubiretama/RS	ZORZAN, A. C. (2016). [WA2356284, Chlorostilbon lucidus (Shaw, 1812)]. Wiki Aves - A Enciclopédia das Aves do Brasil.Disponível em: <http://www.wikiaves.com/2356284> Acesso em: 07 Abr 2020.	http://www.wikiaves.com/2356284
Chlorostilbon_lucidus	Russelia equisetiformis	Legitimate	Male	yes	Francisco T. Tatit	2016-09-07	2016-09-08	Santa Maria da Serra/SP	TATIT, F. T. (2016). [WA2269421, Chlorostilbon lucidus (Shaw, 1812)]. Wiki Aves - A Enciclopédia das Aves do Brasil.Disponível em: <http://www.wikiaves.com/2269421> Acesso em: 08 Abr 2020.	http://www.wikiaves.com/2269421
Chlorostilbon_lucidus	Russelia equisetiformis	Legitimate	Male	yes	Alessandro R. Santos	2016-05-01	2016-05-10	Sorocaba/SP	SANTOS, A. R. (2016). [WA2113523, Chlorostilbon lucidus (Shaw, 1812)]. Wiki Aves - A Enciclopédia das Aves do Brasil.Disponível em: <http://www.wikiaves.com/2113523> Acesso em: 08 Abr 2020.	http://www.wikiaves.com/2113523
Chlorostilbon_lucidus	Russelia equisetiformis	Legitimate	Female	yes	Frederico Swarofsky	2015-04-04	2015-05-10	Matinhos/PR	SWAROFSKY, F. (2015). [WA1689139, Chlorostilbon lucidus (Shaw, 1812)]. Wiki Aves - A Enciclopédia das Aves do Brasil.Disponível em: <http://www.wikiaves.com/1689139> Acesso em: 09 Abr 2020.	http://www.wikiaves.com/1689139
Chlorostilbon_lucidus	Russelia equisetiformis	Legitimate	Female	yes	Sergio Porto	2013-12-29	2015-08-31	Teresópolis/RJ	PORTO, S. R. (2013). [WA1816804, Chlorostilbon lucidus (Shaw, 1812)]. Wiki Aves - A Enciclopédia das Aves do Brasil.Disponível em: <http://www.wikiaves.com/1816804> Acesso em: 09 Abr 2020.	http://www.wikiaves.com/1816804
Chlorostilbon_lucidus	Salvia	Legitimate	Female	yes	Luiz Santos 2	2013-01-11	2017-08-19	Pitanga/PR	SANTOS, L. C. (2013). [WA2665539, Chlorostilbon lucidus (Shaw, 1812)]. Wiki Aves - A Enciclopédia das Aves do Brasil.Disponível em: <http://www.wikiaves.com/2665539> Acesso em: 06 Abr 2020.	http://www.wikiaves.com/2665539
Chlorostilbon_lucidus	Salvia	Legitimate	Female	Not determined	Rayana Feltrin	2016-01-15	2016-01-22	Santa Maria/RS	FELTRIN, R. D. (2016). [WA1994438, Chlorostilbon lucidus (Shaw, 1812)]. Wiki Aves - A Enciclopédia das Aves do Brasil.Disponível em: <http://www.wikiaves.com/1994438> Acesso em: 09 Abr 2020.	http://www.wikiaves.com/1994438
Chlorostilbon_lucidus	Salvia	Legitimate	Female	yes	Antonio Carlos Iglesias	2016-01-20	2016-03-11	São Bento do Sapucaí/SP	IGLESIAS, A. C. (2016). [WA2050182, Chlorostilbon lucidus (Shaw, 1812)]. Wiki Aves - A Enciclopédia das Aves do Brasil.Disponível em: <http://www.wikiaves.com/2050182> Acesso em: 08 Abr 2020.	http://www.wikiaves.com/2050182
Chlorostilbon_lucidus	Streptosolen jamesonii	Legitimate	Male	yes	Mauricio Brasilli	2017-05-28	2017-09-11	Gonçalves/MG	BRASILLI, M. (2017). [WA2693439, Chlorostilbon lucidus (Shaw, 1812)]. Wiki Aves - A Enciclopédia das Aves do Brasil.Disponível em: <http://www.wikiaves.com/2693439> Acesso em: 07 Abr 2020.	http://www.wikiaves.com/2693439
Chlorostilbon_lucidus	Tacinga inamoena	Legitimate	Female	yes	Luiz Gonzaga	2018-03-18	2018-03-22	Parelhas/RN	GONZAGA, L. (2018). [WA2919824, Chlorostilbon lucidus (Shaw, 1812)]. Wiki Aves - A Enciclopédia das Aves do Brasil.Disponível em: <http://www.wikiaves.com/2919824> Acesso em: 05 Abr 2020.	http://www.wikiaves.com/2919824
Chlorostilbon_lucidus	Tithonia rotundifolia	Legitimate	Male	yes	Lawrence Rabelo De Almeida	2019-04-19	2019-04-25	Lagoa Formosa/MG	ALMEIDA, L. R. (2019). [WA3340338, Chlorostilbon lucidus (Shaw, 1812)]. Wiki Aves - A Enciclopédia das Aves do Brasil.Disponível em: <http://www.wikiaves.com/3340338> Acesso em: 05 Abr 2020.	http://www.wikiaves.com/3340338
Chlorostilbon_lucidus	Zinnia	Legitimate	Male	yes	Ivan Cesar	2009-04-11	2015-03-08	Tiradentes/MG	CESAR, I. F. (2009). [WA1632347, Chlorostilbon lucidus (Shaw, 1812)]. Wiki Aves - A Enciclopédia das Aves do Brasil.Disponível em: <http://www.wikiaves.com/1632347> Acesso em: 09 Abr 2020.	http://www.wikiaves.com/1632347
Chlorostilbon_lucidus	Vochysia haenkeana	Legitimate	Male	Not determined	Fabricia Campello	2016-06-24	2016-07-06	Chapada dos Guimarães/MT	CAMPELLO, F. (2016). [WA2183842, Chlorostilbon lucidus (Shaw, 1812)]. Wiki Aves - A Enciclopédia das Aves do Brasil.Disponível em: <http://www.wikiaves.com/2183842> Acesso em: 08 Abr 2020.	http://www.wikiaves.com/2183842
Chlorostilbon_lucidus	Zinnia peruviana	Legitimate	Male	yes	Filipe de Souza Oliveira	2018-09-03	2018-12-08	Ibatiba/ES	OLIVEIRA, F. S. (2018). [WA3205735, Chlorostilbon lucidus (Shaw, 1812)]. Wiki Aves - A Enciclopédia das Aves do Brasil.Disponível em: <http://www.wikiaves.com/3205735> Acesso em: 06 Abr 2020.	http://www.wikiaves.com/3205735
Chlorostilbon_lucidus	Ipomoea	Legitimate	Male	yes	Jocier Araújo	2020-05-13	2020-05-13	Graça/CE	ARAÚJO, J. (2020). [WA3797396, Chlorostilbon lucidus (Shaw, 1812)]. Wiki Aves - A Enciclopédia das Aves do Brasil. Disponível em:	http://www.wikiaves.com/3797396
Chlorostilbon_lucidus	Lantana camara	Legitimate	Male	yes	Krisley Freitas	2020-06-07	2020-06-09	Viçosa/MG	FREITAS, K. X. (2020). [WA3830986, Chlorostilbon lucidus (Shaw, 1812)]. Wiki Aves - A Enciclopédia das Aves do Brasil. Disponível em:	http://www.wikiaves.com/3830986
Chlorostilbon_lucidus	Coleus barbatus	Legitimate	Male	yes	Márcia Osaki	2020-06-14	2020-06-15	São Carlos/SP	OSAKI, M. R. (2020). [WA3838761, Chlorostilbon lucidus (Shaw, 1812)]. Wiki Aves - A Enciclopédia das Aves do Brasil. Disponível em:	http://www.wikiaves.com/3838761
Chlorostilbon_lucidus	Cestrum	Legitimate	Male	yes	Teca Resende	2020-06-30	2020-06-30	Lima Duarte/MG	RESENDE, T. C. (2020). [WA3859331, Chlorostilbon lucidus (Shaw, 1812)]. Wiki Aves - A Enciclopédia das Aves do Brasil. Disponível em:	http://www.wikiaves.com/3859331
Chlorostilbon_lucidus	Lavandula sp	Legitimate	Male	yes	Camila Cultri	2020-06-30	2020-07-02	Restinga/SP	CULTRI, C. N. (2020). [WA3861764, Chlorostilbon lucidus (Shaw, 1812)]. Wiki Aves - A Enciclopédia das Aves do Brasil. Disponível em:	http://www.wikiaves.com/3861764
Chlorostilbon_lucidus	Bauhinia	Legitimate	Male	yes	Gustavo C. M. Silva	2020-07-02	2020-07-04	São José dos Campos/SP	SILVA, G. C. (2020). [WA3863145, Chlorostilbon lucidus (Shaw, 1812)]. Wiki Aves - A Enciclopédia das Aves do Brasil. Disponível em:	http://www.wikiaves.com/3863145
Chlorostilbon_lucidus	Chresta	Legitimate	Male	yes	Kassius Santos	2020-07-04	2020-07-05	Luminárias/MG	SANTOS, K. (2020). [WA3864859, Chlorostilbon lucidus (Shaw, 1812)]. Wiki Aves - A Enciclopédia das Aves do Brasil. Disponível em:	http://www.wikiaves.com/3864859
Chlorostilbon_lucidus	Canna	Legitimate	Male	yes	Guilherme G. Lopes	2020-07-11	2020-07-11	Piracicaba/SP	LOPES, G. G. (2020). [WA3872233, Chlorostilbon lucidus (Shaw, 1812)]. Wiki Aves - A Enciclopédia das Aves do Brasil. Disponível em:	http://www.wikiaves.com/3872233
Chlorostilbon_lucidus	Tacinga sp	Legitimate	Male	yes	Jaelson Gomes	2020-07-10	2020-07-10	Conceição do Coité/BA	GOMES, J. M. (2020). [WA3871190, Chlorostilbon lucidus (Shaw, 1812)]. Wiki Aves - A Enciclopédia das Aves do Brasil. Disponível em:	http://www.wikiaves.com/3871190
Chlorostilbon_lucidus	Duranta erecta	Legitimate	Female	yes	Rafael Coelho	2020-06-20	2020-07-17	Petrolina/PE	COELHO, R. D. (2020). [WA3855723, Chlorostilbon lucidus (Shaw, 1812)]. Wiki Aves - A Enciclopédia das Aves do Brasil. Disponível em:	http://www.wikiaves.com/3855723
Chlorostilbon_lucidus	Vernonanthura	Legitimate	Male	yes	Rodrigo Mayworm	2020-07-19	2020-07-20	Olaria/MG	SILVA, R. M. (2020). [WA3885985, Chlorostilbon lucidus (Shaw, 1812)]. Wiki Aves - A Enciclopédia das Aves do Brasil. Disponível em:	http://www.wikiaves.com/3885985
Chlorostilbon_lucidus	Prunus	Legitimate	Female	yes	George Strozberg	2020-07-19	2020-07-23	Santo Antônio do Pinhal/SP	STROZBERG, G. (2020). [WA3889632, Chlorostilbon lucidus (Shaw, 1812)]. Wiki Aves - A Enciclopédia das Aves do Brasil. Disponível em:	http://www.wikiaves.com/3889632
Chlorostilbon_lucidus	Lavandula sp	Legitimate	Female	yes	Gilberto Diniz	2020-05-12	2020-05-25	Camanducaia/MG	DINIZ, G. (2020). [WA3892174, Chlorostilbon lucidus (Shaw, 1812)]. Wiki Aves - A Enciclopédia das Aves do Brasil. Disponível em:	http://www.wikiaves.com/3892174
Chlorostilbon_lucidus	Petrea volubilis	Legitimate	Male	yes	Juliana Iamarino	2020-07-30	2020-07-31	Campinas/SP	IAMARINO, J. A. (2020). [WA3902598, Chlorostilbon lucidus (Shaw, 1812)]. Wiki Aves - A Enciclopédia das Aves do Brasil. Disponível em:	http://www.wikiaves.com/3902598
Chlorostilbon_lucidus	Opuntia	Legitimate	Female	Not determined	Waltércio Correia	2020-07-27	2020-07-27	São Raimundo Nonato/PI	CORREIA, W. T. (2020). [WA3897469, Chlorostilbon lucidus (Shaw, 1812)]. Wiki Aves - A Enciclopédia das Aves do Brasil. Disponível em:	http://www.wikiaves.com/3897469
Chlorostilbon_lucidus	Russelia sp	Legitimate	Male	Not determined	Clara Eirado	2020-08-08	2020-08-08	Valença/RJ	EIRADO, C. B. (2020). [WA3914757, Chlorostilbon lucidus (Shaw, 1812)]. Wiki Aves - A Enciclopédia das Aves do Brasil. Disponível em:	http://www.wikiaves.com/3914757
Chlorostilbon_lucidus	Lantana camara	Legitimate	Male	Not determined	Elaine Quirelli	2020-07-03	2020-08-11	Ibicoara/BA	QUIRELLI, E. (2020). [WA3920086, Chlorostilbon lucidus (Shaw, 1812)]. Wiki Aves - A Enciclopédia das Aves do Brasil. Disponível em:	http://www.wikiaves.com/3920086
Chlorostilbon_lucidus	Lantana camara	Legitimate	Female	yes	Emerson Araujo	2020-08-12	2020-08-12	Carbonita/MG	ARAUJO, E. L. (2020). [WA3921746, Chlorostilbon lucidus (Shaw, 1812)]. Wiki Aves - A Enciclopédia das Aves do Brasil. Disponível em:	http://www.wikiaves.com/3921746
Chlorostilbon_lucidus	Vernonanthura	Legitimate	Male	yes	Conrado Pável	2020-08-08	2020-08-22	Juiz de Fora/MG	OLIVEIRA, C. P. (2020). [WA3936296, Chlorostilbon lucidus (Shaw, 1812)]. Wiki Aves - A Enciclopédia das Aves do Brasil. Disponível em:	http://www.wikiaves.com/3936296
Chlorostilbon_lucidus	Zinnia elegans	Legitimate	Female	yes	Kaique Soares	2021-05-04	2021-05-05	Silvianópolis/MG	FREITAS, K. S. (2021). [WA4297327, Chlorostilbon lucidus (Shaw, 1812)]. Wiki Aves - A Enciclopédia das Aves do Brasil. Disponível em:	http://www.wikiaves.com/4297327
Chlorostilbon_lucidus	Echeveria	Legitimate	Male	yes	Sergio Murilo	2021-04-25	2021-04-30	Prados/MG	MURILO, S. (2021). [WA4290257, Chlorostilbon lucidus (Shaw, 1812)]. Wiki Aves - A Enciclopédia das Aves do Brasil. Disponível em:	http://www.wikiaves.com/4290257
Chlorostilbon_lucidus	Grevillea banksii	Legitimate	Male	yes	Antonio Carlos Iglesias	2021-04-27	2021-04-27	São Bento do Sapucaí/SP	IGLESIAS, A. C. (2021). [WA4286049, Chlorostilbon lucidus (Shaw, 1812)]. Wiki Aves - A Enciclopédia das Aves do Brasil. Disponível em:	http://www.wikiaves.com/4286049
Chlorostilbon_lucidus	Punica granatum	Legitimate	Female	yes	Pedro Rocha Silva	2021-05-09	2021-05-09	Arcos/MG	ROCHA, P. (2021). [WA4302200, Chlorostilbon lucidus (Shaw, 1812)]. Wiki Aves - A Enciclopédia das Aves do Brasil. Disponível em:	http://www.wikiaves.com/4302200
Chlorostilbon_lucidus	Lantana camara	Legitimate	Female	yes	Alexandre Letam	2021-03-28	2021-04-23	Diamantina/MG	SANTOS, A. S. (2021). [WA4280307, Chlorostilbon lucidus (Shaw, 1812)]. Wiki Aves - A Enciclopédia das Aves do Brasil. Disponível em:	http://www.wikiaves.com/4280307
Chlorostilbon_lucidus	Cnidoscolus	Legitimate	Female	yes	Magno Travassos	2021-04-02	2021-04-21	Dom Inocêncio/PI	OLIVEIRA, M. L. (2021). [WA4278750, Chlorostilbon lucidus (Shaw, 1812)]. Wiki Aves - A Enciclopédia das Aves do Brasil. Disponível em:	http://www.wikiaves.com/4278750
Chlorostilbon_lucidus	Grevillea banksii	Legitimate	Female	No	Gina Bellagamba	2021-03-01	2021-04-09	Uruguaiana/RS	OLIVEIRA, G. B. (2021). [WA4264063, Chlorostilbon lucidus (Shaw, 1812)]. Wiki Aves - A Enciclopédia das Aves do Brasil. Disponível em:	http://www.wikiaves.com/4264063
Chlorostilbon_lucidus	Ipomoea	Legitimate	Male	yes	Claiton Gil	2021-02-15	2021-04-06	São Francisco de Paula/RS	GIL, C. S. (2021). [WA4261545, Chlorostilbon lucidus (Shaw, 1812)]. Wiki Aves - A Enciclopédia das Aves do Brasil. Disponível em:	http://www.wikiaves.com/4261545
Chlorostilbon_lucidus	Calliandra	Legitimate	Male	yes	Cristine Prates	2021-02-17	2021-04-03	Mucugê/BA	PRATES, C. S. (2021). [WA4256904, Chlorostilbon lucidus (Shaw, 1812)]. Wiki Aves - A Enciclopédia das Aves do Brasil. Disponível em:	http://www.wikiaves.com/4256904
Chlorostilbon_lucidus	Melocactus	Legitimate	Female	yes	Reinaldo Barros.	2021-03-28	2021-03-28	Parelhas/RN	SOUSA, R. B. (2021). [WA4250751, Chlorostilbon lucidus (Shaw, 1812)]. Wiki Aves - A Enciclopédia das Aves do Brasil. Disponível em:	http://www.wikiaves.com/4250751
Chlorostilbon_lucidus	Ruellia	Legitimate	Female	yes	Thiago Almeida Lopes	2021-03-27	2021-03-27	Sete Lagoas/MG	LOPES, T. A. (2021). [WA4248886, Chlorostilbon lucidus (Shaw, 1812)]. Wiki Aves - A Enciclopédia das Aves do Brasil. Disponível em:	http://www.wikiaves.com/4248886
Chlorostilbon_lucidus	Ruellia	Legitimate	Female	yes	Thiago Almeida Lopes	2021-03-27	2021-03-27	Sete Lagoas/MG	LOPES, T. A. (2021). [WA4248887, Chlorostilbon lucidus (Shaw, 1812)]. Wiki Aves - A Enciclopédia das Aves do Brasil. Disponível em:	http://www.wikiaves.com/4248887
Chlorostilbon_lucidus	Ruellia	Legitimate	Female	yes	Thiago Almeida Lopes	2021-03-27	2021-03-27	Sete Lagoas/MG	LOPES, T. A. (2021). [WA4248888, Chlorostilbon lucidus (Shaw, 1812)]. Wiki Aves - A Enciclopédia das Aves do Brasil. Disponível em:	http://www.wikiaves.com/4248888
Chlorostilbon_lucidus	Qualea multiflora	Legitimate	Male	yes	Mario Lorenzato	2021-02-28	2021-03-22	Altinópolis/SP	LORENZATO, M. M. (2021). [WA4243622, Chlorostilbon lucidus (Shaw, 1812)]. Wiki Aves - A Enciclopédia das Aves do Brasil. Disponível em:	http://www.wikiaves.com/4243622
Chlorostilbon_lucidus	Aloe	Legitimate	Female	yes	Reny Rodrigues	2020-08-21	2021-03-19	Dourados/MS	RODRIGUES, R. S. (2020). [WA4239824, Chlorostilbon lucidus (Shaw, 1812)]. Wiki Aves - A Enciclopédia das Aves do Brasil. Disponível em:	http://www.wikiaves.com/4239824
Chlorostilbon_lucidus	Ipomoea	Legitimate	Female	yes	Marcos Bühnemann	2021-03-13	2021-03-14	Campo Alegre/SC	BÜHNEMANN, M. R. (2021). [WA4234047, Chlorostilbon lucidus (Shaw, 1812)]. Wiki Aves - A Enciclopédia das Aves do Brasil. Disponível em:	http://www.wikiaves.com/4234047
Chlorostilbon_lucidus	Odontonema sp	Legitimate	Female	No	Valdemiro Schauren	2021-03-02	2021-03-14	São João do Oeste/SC	SCHAUREN, V. P. (2021). [WA4233165, Chlorostilbon lucidus (Shaw, 1812)]. Wiki Aves - A Enciclopédia das Aves do Brasil. Disponível em:	http://www.wikiaves.com/4233165
Chlorostilbon_lucidus	Collaea	Legitimate	Female	yes	Elby Silva	2021-02-06	2021-03-11	Curitiba/PR	SILVA, E. A. (2021). [WA4229860, Chlorostilbon lucidus (Shaw, 1812)]. Wiki Aves - A Enciclopédia das Aves do Brasil. Disponível em:	http://www.wikiaves.com/4229860
Chlorostilbon_lucidus	Odontonema sp	Legitimate	Male	No	Paulo Buchabqui Rodrigues	2021-03-07	2021-03-11	Santo Ângelo/RS	RODRIGUES, P. B. (2021). [WA4229916, Chlorostilbon lucidus (Shaw, 1812)]. Wiki Aves - A Enciclopédia das Aves do Brasil. Disponível em:	http://www.wikiaves.com/4229916
Chlorostilbon_lucidus	Cestrum	Legitimate	Male	yes	Carlos E. Rodrigues	2021-03-06	2021-03-06	Campinas/SP	RODRIGUES, C. E. (2021). [WA4225237, Chlorostilbon lucidus (Shaw, 1812)]. Wiki Aves - A Enciclopédia das Aves do Brasil. Disponível em:	http://www.wikiaves.com/4225237
Chlorostilbon_lucidus	Melocactus	Legitimate	Female	yes	Eugênio Oliveira	2021-02-05	2021-03-09	Lagoa Nova/RN	OLIVEIRA, E. S. (2021). [WA4228498, Chlorostilbon lucidus (Shaw, 1812)]. Wiki Aves - A Enciclopédia das Aves do Brasil. Disponível em:	http://www.wikiaves.com/4228498
Chlorostilbon_lucidus	Russelia sp	Legitimate	Female	yes	Jose G. Oliveira	2021-03-02	2021-03-02	Cesário Lange/SP	OLIVEIRA, J. G. (2021). [WA4221253, Chlorostilbon lucidus (Shaw, 1812)]. Wiki Aves - A Enciclopédia das Aves do Brasil. Disponível em:	http://www.wikiaves.com/4221253
Chlorostilbon_lucidus	Leonotis nepetifolia	Legitimate	Male	yes	Luiza Ikeda Iwaki	2021-02-27	2021-02-27	Junqueirópolis/SP	IWAKI, L. I. (2021). [WA4216983, Chlorostilbon lucidus (Shaw, 1812)]. Wiki Aves - A Enciclopédia das Aves do Brasil. Disponível em:	http://www.wikiaves.com/4216983
Chlorostilbon_lucidus	Stifftia chrysantha	Legitimate	Male	No	Paulo Valadao	2021-02-19	2021-02-19	Campinas/SP	VALADAO, P. R. (2021). [WA4208795, Chlorostilbon lucidus (Shaw, 1812)]. Wiki Aves - A Enciclopédia das Aves do Brasil. Disponível em:	http://www.wikiaves.com/4208795
Chlorostilbon_lucidus	Stifftia chrysantha	Legitimate	Male	No	Paulo Valadao	2021-02-19	2021-02-19	Campinas/SP	VALADAO, P. R. (2021). [WA4208794, Chlorostilbon lucidus (Shaw, 1812)]. Wiki Aves - A Enciclopédia das Aves do Brasil. Disponível em:	http://www.wikiaves.com/4208794
Chlorostilbon_lucidus	Melocactus	Legitimate	Female	yes	Marcelo Maux	2021-02-02	2021-02-17	Lagoa Nova/RN	MAUX, M. (2021). [WA4205795, Chlorostilbon lucidus (Shaw, 1812)]. Wiki Aves - A Enciclopédia das Aves do Brasil. Disponível em:	http://www.wikiaves.com/4205795
Chlorostilbon_lucidus	Melocactus	Legitimate	Female	yes	Silvia Faustino Linhares	2021-02-04	2021-02-13	Lagoa Nova/RN	LINHARES, S. F. (2021). [WA4201204, Chlorostilbon lucidus (Shaw, 1812)]. Wiki Aves - A Enciclopédia das Aves do Brasil. Disponível em:	http://www.wikiaves.com/4201204
Chlorostilbon_lucidus	Euphorbia tithymaloides	Legitimate	Male	yes	Jorge Dantas	2021-01-18	2021-02-13	Equador/RN	DANTAS, J. L. (2021). [WA4201010, Chlorostilbon lucidus (Shaw, 1812)]. Wiki Aves - A Enciclopédia das Aves do Brasil. Disponível em:	http://www.wikiaves.com/4201010
Chlorostilbon_lucidus	Lobelia	Legitimate	Male	yes	Vitor Rolf Laubé	2021-02-06	2021-02-11	Santo André/SP	LAUBÉ, V. R. (2021). [WA4198582, Chlorostilbon lucidus (Shaw, 1812)]. Wiki Aves - A Enciclopédia das Aves do Brasil. Disponível em:	http://www.wikiaves.com/4198582
Chlorostilbon_lucidus	Prunus	Legitimate	Male	yes	Alan Paiva	2020-06-20	2021-02-09	Nova Friburgo/RJ	PAIVA, A. S. (2020). [WA4196692, Chlorostilbon lucidus (Shaw, 1812)]. Wiki Aves - A Enciclopédia das Aves do Brasil. Disponível em:	http://www.wikiaves.com/4196692
Chlorostilbon_lucidus	Lobelia	Legitimate	Male	Not determined	Dú Nyari	2021-02-06	2021-02-08	Corumbataí/SP	NYARI, C. E. (2021). [WA4194828, Chlorostilbon lucidus (Shaw, 1812)]. Wiki Aves - A Enciclopédia das Aves do Brasil. Disponível em:	http://www.wikiaves.com/4194828
Chlorostilbon_lucidus	Asclepias curassavica	Legitimate	Male	No	Lauril Krawczun	2021-02-05	2021-02-06	Rolândia/PR	KRAWCZUN, L. (2021). [WA4192205, Chlorostilbon lucidus (Shaw, 1812)]. Wiki Aves - A Enciclopédia das Aves do Brasil. Disponível em:	http://www.wikiaves.com/4192205
Chlorostilbon_lucidus	Lantana camara	Legitimate	Female	yes	Leonardo Marujo	2020-12-20	2021-02-05	Belo Horizonte/MG	MARUJO, L. S. (2020). [WA4190933, Chlorostilbon lucidus (Shaw, 1812)]. Wiki Aves - A Enciclopédia das Aves do Brasil. Disponível em:	http://www.wikiaves.com/4190933
Chlorostilbon_lucidus	Nopalea cochenillifera	Legitimate	Male	yes	José Vinícius	2021-01-26	2021-01-28	Ouro Branco/RN	MEDEIROS, J. V. (2021). [WA4182069, Chlorostilbon lucidus (Shaw, 1812)]. Wiki Aves - A Enciclopédia das Aves do Brasil. Disponível em:	http://www.wikiaves.com/4182069
Chlorostilbon_lucidus	Cestrum	Legitimate	Male	yes	Adriana Cardoso	2021-01-18	2021-01-24	Bom Retiro/SC	CARDOSO, A. (2021). [WA4176700, Chlorostilbon lucidus (Shaw, 1812)]. Wiki Aves - A Enciclopédia das Aves do Brasil. Disponível em:	http://www.wikiaves.com/4176700
Chlorostilbon_lucidus	Lavandula sp	Legitimate	Male	yes	Teca Resende	2021-01-20	2021-01-22	Lima Duarte/MG	RESENDE, T. C. (2021). [WA4173517, Chlorostilbon lucidus (Shaw, 1812)]. Wiki Aves - A Enciclopédia das Aves do Brasil. Disponível em:	http://www.wikiaves.com/4173517
Chlorostilbon_lucidus	Clerodendrum x speciosum	Legitimate	Male	No	Ricardo Todeschini	2020-12-24	2021-01-16	Curitiba/PR	TODESCHINI, R. A. (2020). [WA4165266, Chlorostilbon lucidus (Shaw, 1812)]. Wiki Aves - A Enciclopédia das Aves do Brasil. Disponível em:	http://www.wikiaves.com/4165266
Chlorostilbon_lucidus	Calliandra	Legitimate	Female	yes	Matheus Luciano	2020-10-01	2020-10-13	Itabira/MG	LUCIANO, M. (2020). [WA4162173, Chlorostilbon lucidus (Shaw, 1812)]. Wiki Aves - A Enciclopédia das Aves do Brasil. Disponível em:	http://www.wikiaves.com/4162173
Chlorostilbon_lucidus	Styrax	Legitimate	Female	yes	Fernando Cotinguiba	2021-01-12	2021-01-13	Franca/SP	COTINGUIBA, F. (2021). [WA4161482, Chlorostilbon lucidus (Shaw, 1812)]. Wiki Aves - A Enciclopédia das Aves do Brasil. Disponível em:	http://www.wikiaves.com/4161482
Chlorostilbon_lucidus	Aloe	Legitimate	Male	yes	Carlos Ferro	2020-11-21	2021-01-04	Cruz Alta/RS	FERRO, C. E. (2020). [WA4149211, Chlorostilbon lucidus (Shaw, 1812)]. Wiki Aves - A Enciclopédia das Aves do Brasil. Disponível em:	http://www.wikiaves.com/4149211
Chlorostilbon_lucidus	Luehea divaricata	Legitimate	Male	yes	Rafael Magno	2020-12-25	2020-12-31	Jundiaí/SP	MAGNO, R. (2020). [WA4141873, Chlorostilbon lucidus (Shaw, 1812)]. Wiki Aves - A Enciclopédia das Aves do Brasil. Disponível em:	http://www.wikiaves.com/4141873
Chlorostilbon_lucidus	Bignoniaceae	Legitimate	Female	yes	Anselmo Silva	2020-12-06	2020-12-30	Cruz Alta/RS	SILVA, A. J. (2020). [WA4140568, Chlorostilbon lucidus (Shaw, 1812)]. Wiki Aves - A Enciclopédia das Aves do Brasil. Disponível em:	http://www.wikiaves.com/4140568
Chlorostilbon_lucidus	Bougainvillea	Legitimate	Female	yes	Fabio S. Santos	2020-12-23	2020-12-26	Triunfo/PE	SANTOS, F. S. (2020). [WA4133641, Chlorostilbon lucidus (Shaw, 1812)]. Wiki Aves - A Enciclopédia das Aves do Brasil. Disponível em:	http://www.wikiaves.com/4133641
Chlorostilbon_lucidus	Hibiscus	Legitimate	Female	yes	João B. Santos	2020-12-07	2020-12-08	Encruzilhada do Sul/RS	SANTOS, J. E. (2020). [WA4110918, Chlorostilbon lucidus (Shaw, 1812)]. Wiki Aves - A Enciclopédia das Aves do Brasil. Disponível em:	http://www.wikiaves.com/4110918
Chlorostilbon_lucidus	Tillandsia	Legitimate	Female	yes	Diego Balbi	2020-10-25	2020-12-02	Itabira/MG	BALBI, D. (2020). [WA4101695, Chlorostilbon lucidus (Shaw, 1812)]. Wiki Aves - A Enciclopédia das Aves do Brasil. Disponível em:	http://www.wikiaves.com/4101695
Chlorostilbon_lucidus	Lantana camara	Legitimate	Female	yes	Juliano Groppo	2020-12-02	2020-12-03	Piracicaba/SP	GROPPO, J. A. (2020). [WA4103843, Chlorostilbon lucidus (Shaw, 1812)]. Wiki Aves - A Enciclopédia das Aves do Brasil. Disponível em:	http://www.wikiaves.com/4103843
Chlorostilbon_lucidus	Lantana camara	Legitimate	Female	yes	Juliano Groppo	2020-08-12	2020-11-29	Piracicaba/SP	GROPPO, J. A. (2020). [WA4096669, Chlorostilbon lucidus (Shaw, 1812)]. Wiki Aves - A Enciclopédia das Aves do Brasil. Disponível em:	http://www.wikiaves.com/4096669
Chlorostilbon_lucidus	Pentas	Legitimate	Female	yes	Ilza Noronha	2020-12-01	2020-12-01	Volta Redonda/RJ	NORONHA, I. M. (2020). [WA4100666, Chlorostilbon lucidus (Shaw, 1812)]. Wiki Aves - A Enciclopédia das Aves do Brasil. Disponível em:	http://www.wikiaves.com/4100666
Chlorostilbon_lucidus	Jacaranda mimosifolia	Legitimate	Female	yes	Darcio Benavides	2020-11-05	2020-11-17	Cesário Lange/SP	BENAVIDES, D. (2020). [WA4078945, Chlorostilbon lucidus (Shaw, 1812)]. Wiki Aves - A Enciclopédia das Aves do Brasil. Disponível em:	http://www.wikiaves.com/4078945
Chlorostilbon_lucidus	Lantana camara	Legitimate	Male	Not determined	Vanessa Silveira	2020-11-12	2020-11-14	Assis/SP	SILVEIRA, V. (2020). [WA4073118, Chlorostilbon lucidus (Shaw, 1812)]. Wiki Aves - A Enciclopédia das Aves do Brasil. Disponível em:	http://www.wikiaves.com/4073118
Chlorostilbon_lucidus	Pentas	Legitimate	Female	yes	Tânia Mara de Camargo	2020-10-18	2020-11-01	Campinas/SP	CAMARGO, T. M. (2020). [WA4050519, Chlorostilbon lucidus (Shaw, 1812)]. Wiki Aves - A Enciclopédia das Aves do Brasil. Disponível em:	http://www.wikiaves.com/4050519
Chlorostilbon_lucidus	Crotalaria	Legitimate	Male	yes	Rafael Bordalo	2020-11-07	2020-11-08	Resende/RJ	BORDALO, R. S. (2020). [WA4064996, Chlorostilbon lucidus (Shaw, 1812)]. Wiki Aves - A Enciclopédia das Aves do Brasil. Disponível em:	http://www.wikiaves.com/4064996
Chlorostilbon_lucidus	Lantana camara	Legitimate	Female	yes	Luiz Gonzaga	2020-10-20	2020-10-27	Parelhas/RN	GONZAGA, L. (2020). [WA4042549, Chlorostilbon lucidus (Shaw, 1812)]. Wiki Aves - A Enciclopédia das Aves do Brasil. Disponível em:	http://www.wikiaves.com/4042549
Chlorostilbon_lucidus	Pachystachys lutea	Legitimate	Female	yes	Agostinho Almeida	2020-10-20	2020-10-20	Sorocaba/SP	ALMEIDA, A. J. (2020). [WA4030062, Chlorostilbon lucidus (Shaw, 1812)]. Wiki Aves - A Enciclopédia das Aves do Brasil. Disponível em:	http://www.wikiaves.com/4030062
Chlorostilbon_lucidus	Bougainvillea	Legitimate	Female	yes	Luiz Gonzaga	2020-10-06	2020-10-19	Parelhas/RN	GONZAGA, L. (2020). [WA4027834, Chlorostilbon lucidus (Shaw, 1812)]. Wiki Aves - A Enciclopédia das Aves do Brasil. Disponível em:	http://www.wikiaves.com/4027834
Chlorostilbon_lucidus	Qualea dichotoma	Legitimate	Female	yes	Paulo S. Junior	2020-10-18	2020-10-19	Ibiraci/MG	SILVA, P. C. (2020). [WA4027399, Chlorostilbon lucidus (Shaw, 1812)]. Wiki Aves - A Enciclopédia das Aves do Brasil. Disponível em:	http://www.wikiaves.com/4027399
Chlorostilbon_lucidus	Lantana camara	Legitimate	Female	Not determined	Elaine Quirelli	2020-10-13	2020-10-18	Ibicoara/BA	QUIRELLI, E. (2020). [WA4024792, Chlorostilbon lucidus (Shaw, 1812)]. Wiki Aves - A Enciclopédia das Aves do Brasil. Disponível em:	http://www.wikiaves.com/4024792
Chlorostilbon_lucidus	Securidaca	Legitimate	Indeterminado	Not determined	Roberta Prudencio	2020-09-30	2020-10-14	Goiás/GO	PRUDENCIO, R. (2020). [WA4018357, Chlorostilbon lucidus (Shaw, 1812)]. Wiki Aves - A Enciclopédia das Aves do Brasil. Disponível em:	http://www.wikiaves.com/4018357
Chlorostilbon_lucidus	Melocactus	Legitimate	Male	yes	Eduardo Bergo	2020-09-16	2020-10-05	Potengi/CE	BERGO, E. S. (2020). [WA4004993, Chlorostilbon lucidus (Shaw, 1812)]. Wiki Aves - A Enciclopédia das Aves do Brasil. Disponível em:	http://www.wikiaves.com/4004993
Chlorostilbon_lucidus	Grevillea banksii	Legitimate	Female	yes	Norica Iglesias	2020-05-09	2020-10-02	São Bento do Sapucaí/SP	IGLESIAS, N. H. (2020). [WA3999237, Chlorostilbon lucidus (Shaw, 1812)]. Wiki Aves - A Enciclopédia das Aves do Brasil. Disponível em:	http://www.wikiaves.com/3999237
Chlorostilbon_lucidus	Lantana camara	Legitimate	Male	yes	Leticia Zimback	2020-09-20	2020-09-26	São Paulo/SP	ZIMBACK, L. B. (2020). [WA3990106, Chlorostilbon lucidus (Shaw, 1812)]. Wiki Aves - A Enciclopédia das Aves do Brasil. Disponível em:	http://www.wikiaves.com/3990106
Chlorostilbon_lucidus	Lantana camara	Legitimate	Female	Not determined	Gilberto Jose Machado De Faria	2020-09-22	2020-09-23	Itajubá/MG	FARIA, G. J. (2020). [WA3984972, Chlorostilbon lucidus (Shaw, 1812)]. Wiki Aves - A Enciclopédia das Aves do Brasil. Disponível em:	http://www.wikiaves.com/3984972
Chlorostilbon_lucidus	Lantana camara	Legitimate	Female	Not determined	Gilberto Jose Machado De Faria	2020-09-22	2020-09-23	Itajubá/MG	FARIA, G. J. (2020). [WA3984971, Chlorostilbon lucidus (Shaw, 1812)]. Wiki Aves - A Enciclopédia das Aves do Brasil. Disponível em:	http://www.wikiaves.com/3984971
Chlorostilbon_lucidus	Serjania	Legitimate	Male	yes	Fausto Araújo	2020-09-20	2020-09-22	Botumirim/MG	ARAÚJO, F. R. (2020). [WA3983778, Chlorostilbon lucidus (Shaw, 1812)]. Wiki Aves - A Enciclopédia das Aves do Brasil. Disponível em:	http://www.wikiaves.com/3983778
Chlorostilbon_lucidus	Zinnia	Legitimate	Indeterminado	Not determined	Rodrigo Terra	2020-09-20	2020-09-20	Campanha/MG	MACIEL, R. C. (2020). [WA3981154, Chlorostilbon lucidus (Shaw, 1812)]. Wiki Aves - A Enciclopédia das Aves do Brasil. Disponível em:	http://www.wikiaves.com/3981154
Chlorostilbon_lucidus	Euphorbia tithymaloides	Legitimate	Male	yes	Jaelson Gomes	2020-09-13	2020-09-13	Conceição do Coité/BA	GOMES, J. M. (2020). [WA3970101, Chlorostilbon lucidus (Shaw, 1812)]. Wiki Aves - A Enciclopédia das Aves do Brasil. Disponível em:	http://www.wikiaves.com/3970101
Chlorostilbon_lucidus	Melocactus	Legitimate	Female	yes	Almir Neves	2020-08-21	2020-09-04	Santa Cruz do Capibaribe/PE	ARAUJO, A. D. (2020). [WA3956208, Chlorostilbon lucidus (Shaw, 1812)]. Wiki Aves - A Enciclopédia das Aves do Brasil. Disponível em:	http://www.wikiaves.com/3956208
Chlorostilbon_lucidus	Bowdichia virgilioides	Legitimate	Female	yes	Paulo D. Rezende	2020-09-02	2020-09-03	Alto Paraíso de Goiás/GO	REZENDE, P. D. (2020). [WA3954447, Chlorostilbon lucidus (Shaw, 1812)]. Wiki Aves - A Enciclopédia das Aves do Brasil. Disponível em:	http://www.wikiaves.com/3954447
Chlorostilbon_lucidus	Streptosolen jamesonii	Legitimate	Male	yes	Ezequiel Ortolan	2020-07-26	2020-09-02	Cordeirópolis/SP	ORTOLAN, E. (2020). [WA3953945, Chlorostilbon lucidus (Shaw, 1812)]. Wiki Aves - A Enciclopédia das Aves do Brasil. Disponível em:	http://www.wikiaves.com/3953945
Chlorostilbon_lucidus	Inga	Legitimate	Female	yes	Luís Bergamim	2020-08-29	2020-08-31	Araraquara/SP	BERGAMIM, L. A. (2020). [WA3950599, Chlorostilbon lucidus (Shaw, 1812)]. Wiki Aves - A Enciclopédia das Aves do Brasil. Disponível em:	http://www.wikiaves.com/3950599
Chlorostilbon_lucidus	Lamiaceae	Legitimate	Male	yes	Carlos Gussoni	2020-08-27	2020-08-27	Rio Claro/SP	GUSSONI, C. O. (2020). [WA3944081, Chlorostilbon lucidus (Shaw, 1812)]. Wiki Aves - A Enciclopédia das Aves do Brasil. Disponível em:	http://www.wikiaves.com/3944081
Chlorostilbon_lucidus	Bowdichia virgilioides	Legitimate	Male	yes	Matheus Henrique	2020-08-23	2020-08-26	São Sebastião do Paraíso/MG	REIS, M. H. (2020). [WA3942579, Chlorostilbon lucidus (Shaw, 1812)]. Wiki Aves - A Enciclopédia das Aves do Brasil. Disponível em:	http://www.wikiaves.com/3942579
Chlorostilbon_lucidus	Streptosolen jamesonii	Legitimate	Male	yes	Camila Siqueira	2020-07-11	2020-08-19	Santo Antônio do Pinhal/SP	SIQUEIRA, C. A. (2020). [WA3932431, Chlorostilbon lucidus (Shaw, 1812)]. Wiki Aves - A Enciclopédia das Aves do Brasil. Disponível em:	http://www.wikiaves.com/3932431
Chlorostilbon_lucidus	Bauhinia variegata	Theft	Female	yes	Daniel Alfenas	2018-07-30	2018-07-31	Cabreúva/SP	ALFENAS, D. A. (2018). [WA3054324, Chlorostilbon lucidus (Shaw, 1812)]. Wiki Aves - A Enciclopédia das Aves do Brasil.Disponível em: <http://www.wikiaves.com/3054324> Acesso em: 05 Abr 2020.	http://www.wikiaves.com/3054324
Chlorostilbon_lucidus	Caesalpinia pulcherrima	Theft	Male	yes	Paulo Miranda	2019-02-28	2019-06-27	Potengi/CE	G.NETO, P. M. (2019). [WA3400208, Chlorostilbon lucidus (Shaw, 1812)]. Wiki Aves - A Enciclopédia das Aves do Brasil.Disponível em: <http://www.wikiaves.com/3400208> Acesso em: 05 Abr 2020.	http://www.wikiaves.com/3400208
Chlorostilbon_lucidus	Caesalpinia pulcherrima	Theft	Female	yes	Thiago Thel	2018-11-10	2019-03-22	Juazeiro do Norte/CE	THEL, T. N. (2018). [WA3310913, Chlorostilbon lucidus (Shaw, 1812)]. Wiki Aves - A Enciclopédia das Aves do Brasil.Disponível em: <http://www.wikiaves.com/3310913> Acesso em: 05 Abr 2020.	http://www.wikiaves.com/3310913
Chlorostilbon_lucidus	Caesalpinia pulcherrima	Theft	Male	No	Miguel B. Lima	2017-12-09	2017-12-14	Marília/SP	LIMA, M. B. (2017). [WA2814937, Chlorostilbon lucidus (Shaw, 1812)]. Wiki Aves - A Enciclopédia das Aves do Brasil.Disponível em: <http://www.wikiaves.com/2814937> Acesso em: 06 Abr 2020.	http://www.wikiaves.com/2814937
Chlorostilbon_lucidus	Ceiba speciosa	Theft	Male	yes	Kaique Freitas	2020-02-25	2020-02-26	Carvalhópolis/MG	FREITAS, K. S. (2020). [WA3699744, Chlorostilbon lucidus (Shaw, 1812)]. Wiki Aves - A Enciclopédia das Aves do Brasil.Disponível em: <http://www.wikiaves.com/3699744> Acesso em: 04 Abr 2020.	http://www.wikiaves.com/3699744
Chlorostilbon_lucidus	Ceiba speciosa	Theft	Female	yes	Zenaro	2016-03-21	2016-03-21	Bom Sucesso de Itararé/SP	ZENARO, A. M. (2016). [WA2060652, Chlorostilbon lucidus (Shaw, 1812)]. Wiki Aves - A Enciclopédia das Aves do Brasil.Disponível em: <http://www.wikiaves.com/2060652> Acesso em: 08 Abr 2020.	http://www.wikiaves.com/2060652
Chlorostilbon_lucidus	Erythrina speciosa Andrews	Theft	Not determined	Not determined	Carlos Gussoni	2017-08-10	2017-08-11	Rio Claro/SP	GUSSONI, C. O. (2017). [WA2655912, Chlorostilbon lucidus (Shaw, 1812)]. Wiki Aves - A Enciclopédia das Aves do Brasil.Disponível em: <http://www.wikiaves.com/2655912> Acesso em: 06 Abr 2020.	http://www.wikiaves.com/2655912
Chlorostilbon_lucidus	Hibiscus	Theft	Male	Not determined	Alex Castilho	2015-01-20	2015-04-11	Bonito/MS	CASTILHO, A. (2015). [WA1595069, Chlorostilbon lucidus (Shaw, 1812)]. Wiki Aves - A Enciclopédia das Aves do Brasil.Disponível em: <http://www.wikiaves.com/1595069> Acesso em: 09 Abr 2020.	http://www.wikiaves.com/1595069
Chlorostilbon_lucidus	Iris domestica	Theft	Female	Not determined	João Victor Ferrari da Silva	2019-01-10	2019-01-11	São Borja/RS	SILVA, J. V. (2019). [WA3243063, Chlorostilbon lucidus (Shaw, 1812)]. Wiki Aves - A Enciclopédia das Aves do Brasil.Disponível em: <http://www.wikiaves.com/3243063> Acesso em: 05 Abr 2020.	http://www.wikiaves.com/3243063
Chlorostilbon_lucidus	Coleus barbatus	Theft	Male	yes	Alexandre Cardoso	2018-06-17	2019-07-17	Jaú/SP	CARDOSO, A. M. (2018). [WA3421625, Chlorostilbon lucidus (Shaw, 1812)]. Wiki Aves - A Enciclopédia das Aves do Brasil.Disponível em: <http://www.wikiaves.com/3421625> Acesso em: 05 Abr 2020.	http://www.wikiaves.com/3421625
Chlorostilbon_lucidus	Coleus barbatus	Theft	Male	yes	Cláudia Schots	2018-02-04	2019-05-10	Alto Caparaó/MG	SCHOTS, C. E. (2018). [WA3353719, Chlorostilbon lucidus (Shaw, 1812)]. Wiki Aves - A Enciclopédia das Aves do Brasil.Disponível em: <http://www.wikiaves.com/3353719> Acesso em: 05 Abr 2020.	http://www.wikiaves.com/3353719
Chlorostilbon_lucidus	Coleus barbatus	Theft	Male	yes	Kamila Klein	2019-06-02	2019-06-02	Domingos Martins/ES	KLEIN, K. S. (2019). [WA3375154, Chlorostilbon lucidus (Shaw, 1812)]. Wiki Aves - A Enciclopédia das Aves do Brasil.Disponível em: <http://www.wikiaves.com/3375154> Acesso em: 05 Abr 2020.	http://www.wikiaves.com/3375154
Chlorostilbon_lucidus	Coleus barbatus	Theft	Male	yes	Gilson Luz	2018-07-21	2018-07-23	Domingos Martins/ES	LUZ, G. M. (2018). [WA3044608, Chlorostilbon lucidus (Shaw, 1812)]. Wiki Aves - A Enciclopédia das Aves do Brasil.Disponível em: <http://www.wikiaves.com/3044608> Acesso em: 05 Abr 2020.	http://www.wikiaves.com/3044608
Chlorostilbon_lucidus	Coleus barbatus	Theft	Male	yes	Márcia Giovani	2018-05-06	2018-05-15	Itamonte/MG	PORTO, M. A. (2018). [WA2973707, Chlorostilbon lucidus (Shaw, 1812)]. Wiki Aves - A Enciclopédia das Aves do Brasil.Disponível em: <http://www.wikiaves.com/2973707> Acesso em: 05 Abr 2020.	http://www.wikiaves.com/2973707
Chlorostilbon_lucidus	Coleus barbatus	Theft	Male	yes	Ruy Goes	2017-05-18	2017-05-20	Louveira/SP	GOES, R. (2017). [WA2563507, Chlorostilbon lucidus (Shaw, 1812)]. Wiki Aves - A Enciclopédia das Aves do Brasil.Disponível em: <http://www.wikiaves.com/2563507> Acesso em: 07 Abr 2020.	http://www.wikiaves.com/2563507
Chlorostilbon_lucidus	Coleus barbatus	Theft	Male	yes	Ralph Antunes	2017-06-25	2017-06-27	Nova Friburgo/RJ	ANTUNES, R. M. (2017). [WA2603601, Chlorostilbon lucidus (Shaw, 1812)]. Wiki Aves - A Enciclopédia das Aves do Brasil.Disponível em: <http://www.wikiaves.com/2603601> Acesso em: 07 Abr 2020.	http://www.wikiaves.com/2603601
Chlorostilbon_lucidus	Coleus barbatus	Theft	Male	yes	Diogo Pavan	2017-06-10	2017-06-13	Cabreúva/SP	GATTI, D. P. (2017). [WA2587857, Chlorostilbon lucidus (Shaw, 1812)]. Wiki Aves - A Enciclopédia das Aves do Brasil.Disponível em: <http://www.wikiaves.com/2587857> Acesso em: 07 Abr 2020.	http://www.wikiaves.com/2587857
Chlorostilbon_lucidus	Coleus barbatus	Theft	Female	yes	Clayton Bonafé	2017-05-14	2017-05-15	Piranguinho/MG	BONAFÉ, C. (2017). [WA2559146, Chlorostilbon lucidus (Shaw, 1812)]. Wiki Aves - A Enciclopédia das Aves do Brasil.Disponível em: <http://www.wikiaves.com/2559146> Acesso em: 07 Abr 2020.	http://www.wikiaves.com/2559146
Chlorostilbon_lucidus	Coleus barbatus	Theft	Male	yes	Fernanda Fernandes - Fernandex	2017-03-18	2017-03-21	Sobral/CE	FERNANDES, F. (2017). [WA2503295, Chlorostilbon lucidus (Shaw, 1812)]. Wiki Aves - A Enciclopédia das Aves do Brasil.Disponível em: <http://www.wikiaves.com/2503295> Acesso em: 07 Abr 2020.	http://www.wikiaves.com/2503295
Chlorostilbon_lucidus	Coleus barbatus	Theft	Male	yes	Leandro M. Sousa	2016-07-16	2016-07-18	Ibatiba/ES	SOUSA, L. D. (2016). [WA2199445, Chlorostilbon lucidus (Shaw, 1812)]. Wiki Aves - A Enciclopédia das Aves do Brasil.Disponível em: <http://www.wikiaves.com/2199445> Acesso em: 07 Abr 2020.	http://www.wikiaves.com/2199445
Chlorostilbon_lucidus	Coleus barbatus	Theft	Female	yes	Renato J Muniz	2016-05-18	2016-05-25	Campestre/MG	MUNIZ, R. J. (2016). [WA2130496, Chlorostilbon lucidus (Shaw, 1812)]. Wiki Aves - A Enciclopédia das Aves do Brasil.Disponível em: <http://www.wikiaves.com/2130496> Acesso em: 08 Abr 2020.	http://www.wikiaves.com/2130496
Chlorostilbon_lucidus	Coleus barbatus	Theft	Male	yes	João Dittmar Filho	2016-03-26	2016-04-04	Santana de Parnaíba/SP	FILHO, J. H. (2016). [WA2075493, Chlorostilbon lucidus (Shaw, 1812)]. Wiki Aves - A Enciclopédia das Aves do Brasil.Disponível em: <http://www.wikiaves.com/2075493> Acesso em: 08 Abr 2020.	http://www.wikiaves.com/2075493
Chlorostilbon_lucidus	Coleus barbatus	Theft	Female	yes	Jose G. Oliveira	2015-10-24	2015-10-24	Iperó/SP	OLIVEIRA, J. G. (2015). [WA1884470, Chlorostilbon lucidus (Shaw, 1812)]. Wiki Aves - A Enciclopédia das Aves do Brasil.Disponível em: <http://www.wikiaves.com/1884470> Acesso em: 09 Abr 2020.	http://www.wikiaves.com/1884470
Chlorostilbon_lucidus	Coleus barbatus	Theft	Male	yes	André C. Pacheco	2015-04-19	2015-04-20	Petrópolis/RJ	PACHECO, A. R. (2015). [WA1669470, Chlorostilbon lucidus (Shaw, 1812)]. Wiki Aves - A Enciclopédia das Aves do Brasil.Disponível em: <http://www.wikiaves.com/1669470> Acesso em: 09 Abr 2020.	http://www.wikiaves.com/1669470
Chlorostilbon_lucidus	Coleus barbatus	Theft	Female	yes	João Vizel	2015-07-19	2015-08-03	Barretos/SP	REIS, J. L. (2015). [WA1784702, Chlorostilbon lucidus (Shaw, 1812)]. Wiki Aves - A Enciclopédia das Aves do Brasil.Disponível em: <http://www.wikiaves.com/1784702> Acesso em: 09 Abr 2020.	http://www.wikiaves.com/1784702
Chlorostilbon_lucidus	Coleus barbatus	Theft	Male	yes	Ralph Antunes	2015-09-07	2015-09-07	Nova Friburgo/RJ	ANTUNES, R. M. (2015). [WA1826297, Chlorostilbon lucidus (Shaw, 1812)]. Wiki Aves - A Enciclopédia das Aves do Brasil.Disponível em: <http://www.wikiaves.com/1826297> Acesso em: 09 Abr 2020.	http://www.wikiaves.com/1826297
Chlorostilbon_lucidus	Vochysia tucanorum	Theft	Female	yes	Emerson Kaseker	2017-12-24	2018-08-04	Santana do Riacho/MG	KASEKER, E. P. (2017). [WA3060290, Chlorostilbon lucidus (Shaw, 1812)]. Wiki Aves - A Enciclopédia das Aves do Brasil.Disponível em: <http://www.wikiaves.com/3060290> Acesso em: 05 Abr 2020.	http://www.wikiaves.com/3060290
Chlorostilbon_lucidus	Coleus barbatus	Theft	Male	yes	Kaique Soares	2020-06-20	2020-06-21	Carvalhópolis/MG	FREITAS, K. S. (2020). [WA3847465, Chlorostilbon lucidus (Shaw, 1812)]. Wiki Aves - A Enciclopédia das Aves do Brasil. Disponível em:	http://www.wikiaves.com/3847465
Chlorostilbon_lucidus	Coleus barbatus	Theft	Female	yes	Rui Othon	2020-07-17	2020-07-17	Iperó/SP	OTHON, R. (2020). [WA3881619, Chlorostilbon lucidus (Shaw, 1812)]. Wiki Aves - A Enciclopédia das Aves do Brasil. Disponível em:	http://www.wikiaves.com/3881619
Chlorostilbon_lucidus	Citrus	Theft	Male	yes	Adriano P. Oliveira	2021-04-09	2021-04-15	Itabaiana/SE	OLIVEIRA, A. V. (2021). [WA4270488, Chlorostilbon lucidus (Shaw, 1812)]. Wiki Aves - A Enciclopédia das Aves do Brasil. Disponível em:	http://www.wikiaves.com/4270488
Chlorostilbon_lucidus	Ceiba sp	Theft	Male	yes	Norton Lages	2021-03-12	2021-03-12	Arapongas/PR	LAGES, N. R. (2021). [WA4230944, Chlorostilbon lucidus (Shaw, 1812)]. Wiki Aves - A Enciclopédia das Aves do Brasil. Disponível em:	http://www.wikiaves.com/4230944
Chlorostilbon_lucidus	Ocimum	Theft	Female	yes	Rodrigo Castro 2	2021-02-09	2021-02-09	Divinópolis/MG	CASTRO, R. (2021). [WA4197016, Chlorostilbon lucidus (Shaw, 1812)]. Wiki Aves - A Enciclopédia das Aves do Brasil. Disponível em:	http://www.wikiaves.com/4197016
Chlorostilbon_lucidus	Cenostigma pluviosum	Theft	Female	yes	Marcio Maia	2021-02-01	2021-02-01	Porto Alegre/RS	MAIA, M. A. (2021). [WA4186705, Chlorostilbon lucidus (Shaw, 1812)]. Wiki Aves - A Enciclopédia das Aves do Brasil. Disponível em:	http://www.wikiaves.com/4186705
Chlorostilbon_lucidus	Coleus barbatus	Theft	Female	Not determined	Regina Manzur	2020-08-29	2020-12-27	Campinas/SP	MANZUR, R. B. (2020). [WA4135469, Chlorostilbon lucidus (Shaw, 1812)]. Wiki Aves - A Enciclopédia das Aves do Brasil. Disponível em:	http://www.wikiaves.com/4135469
Chlorostilbon_lucidus	Coleus	Theft	Male	yes	Alessandra Vidal	2020-10-10	2020-10-26	Ipatinga/MG	VIDAL, A. (2020). [WA4041385, Chlorostilbon lucidus (Shaw, 1812)]. Wiki Aves - A Enciclopédia das Aves do Brasil. Disponível em:	http://www.wikiaves.com/4041385
Chlorostilbon_lucidus	Calliandra	Theft	Male	yes	Guillermo Andreo	2020-10-07	2020-10-09	Maquiné/RS	ANDREO, G. (2020). [WA4009374, Chlorostilbon lucidus (Shaw, 1812)]. Wiki Aves - A Enciclopédia das Aves do Brasil. Disponível em:	http://www.wikiaves.com/4009374
Chlorostilbon_lucidus	Callianthe striata (Dicks. ex Lindl.) Donnell	Robber	Male	yes	Igino Rotta	2016-08-14	2018-12-13	Tatuí/SP	ROTTA, I. (2016). [WA3211023, Chlorostilbon lucidus (Shaw, 1812)]. Wiki Aves - A Enciclopédia das Aves do Brasil.Disponível em: <http://www.wikiaves.com/3211023> Acesso em: 05 Abr 2020.	http://www.wikiaves.com/3211023
Chlorostilbon_lucidus	Callianthe striata (Dicks. ex Lindl.) Donnell	Robber	Male	yes	Gabriel Spenassatto	2016-03-05	2018-02-23	São Miguel do Oeste/SC	GABRIEL (2016). [WA2894898, Chlorostilbon lucidus (Shaw, 1812)]. Wiki Aves - A Enciclopédia das Aves do Brasil.Disponível em: <http://www.wikiaves.com/2894898> Acesso em: 05 Abr 2020.	http://www.wikiaves.com/2894898
Chlorostilbon_lucidus	Tecoma stans (L.) Juss. ex Kunth (Bignoniaceae)	Robber	Male	yes	Marcelo Leandro Vieira	2018-01-15	2018-01-16	Barretos/SP	VIEIRA, M. L. (2018). [WA2850168, Chlorostilbon lucidus (Shaw, 1812)]. Wiki Aves - A Enciclopédia das Aves do Brasil.Disponível em: <http://www.wikiaves.com/2850168> Acesso em: 05 Abr 2020.	http://www.wikiaves.com/2850168
Chlorostilbon_lucidus	Kalanchoe pinnata (Lam.) Pers.	Robber	Male	yes	Luis G Alberto	2018-07-26	2018-07-27	São Pedro da Aldeia/RJ	ALBERTO, L. G. (2018). [WA3049278, Chlorostilbon lucidus (Shaw, 1812)]. Wiki Aves - A Enciclopédia das Aves do Brasil.Disponível em: <http://www.wikiaves.com/3049278> Acesso em: 06 Abr 2020.	http://www.wikiaves.com/3049278
Chlorostilbon_lucidus	Fuchsia	Robber	Male	No	Moacir Santos	2018-01-19	2018-02-08	Bento Gonçalves/RS	SANTOS, M. D. (2018). [WA2877399, Chlorostilbon lucidus (Shaw, 1812)]. Wiki Aves - A Enciclopédia das Aves do Brasil.Disponível em: <http://www.wikiaves.com/2877399> Acesso em: 05 Abr 2020.	http://www.wikiaves.com/2877399
Chlorostilbon_lucidus	Handroanthus	Robber	Male	yes	Claudio Luiz Oliveira	2018-09-18	2019-03-18	Porto Alegre/RS	OLIVEIRA, C. L. (2018). [WA3307559, Chlorostilbon lucidus (Shaw, 1812)]. Wiki Aves - A Enciclopédia das Aves do Brasil.Disponível em: <http://www.wikiaves.com/3307559> Acesso em: 05 Abr 2020.	http://www.wikiaves.com/3307559
Chlorostilbon_lucidus	Justicia brandegeeana	Robber	Male	yes	Ronilton Senna	2019-02-15	2019-03-19	Lençóis/BA	FERREIRA, R. S. (2019). [WA3309162, Chlorostilbon lucidus (Shaw, 1812)]. Wiki Aves - A Enciclopédia das Aves do Brasil.Disponível em: <http://www.wikiaves.com/3309162> Acesso em: 05 Abr 2020.	http://www.wikiaves.com/3309162
Chlorostilbon_lucidus	Justicia brandegeeana	Robber	Female	yes	Alexandre Cardoso	2017-11-04	2017-11-10	Taubaté/SP	CARDOSO, A. M. (2017). [WA2774194, Chlorostilbon lucidus (Shaw, 1812)]. Wiki Aves - A Enciclopédia das Aves do Brasil.Disponível em: <http://www.wikiaves.com/2774194> Acesso em: 06 Abr 2020.	http://www.wikiaves.com/2774194
Chlorostilbon_lucidus	Justicia brandegeeana	Robber	Male	yes	Ricardo Mendonça	2012-07-03	2016-06-25	Guaratinguetá/SP	MENDONÇA, R. (2012). [WA2169470, Chlorostilbon lucidus (Shaw, 1812)]. Wiki Aves - A Enciclopédia das Aves do Brasil.Disponível em: <http://www.wikiaves.com/2169470> Acesso em: 08 Abr 2020.	http://www.wikiaves.com/2169470
Chlorostilbon_lucidus	Justicia brandegeeana	Robber	Male	yes	Itirapina/SP	2004-11-15	2015-11-06	Itirapina/SP	SOLCI, A. M. (2004). [WA1900408, Chlorostilbon lucidus (Shaw, 1812)]. Wiki Aves - A Enciclopédia das Aves do Brasil.Disponível em: <http://www.wikiaves.com/1900408> Acesso em: 09 Abr 2020.	http://www.wikiaves.com/1900408
Chlorostilbon_lucidus	Malvaviscus arboreus	Robber	Not determined	No	Jarbas Mattos	2017-02-10	2018-06-05	Jacareí/SP	MATTOS, J. P. (2017). [WA2995411, Chlorostilbon lucidus (Shaw, 1812)]. Wiki Aves - A Enciclopédia das Aves do Brasil.Disponível em: <http://www.wikiaves.com/2995411> Acesso em: 05 Abr 2020.	http://www.wikiaves.com/2995411
Chlorostilbon_lucidus	Malvaviscus arboreus	Robber	Female	yes	Patricia Souza	2017-06-16	2017-06-17	Itajubá/MG	SOUZA, P. C. (2017). [WA2591272, Chlorostilbon lucidus (Shaw, 1812)]. Wiki Aves - A Enciclopédia das Aves do Brasil.Disponível em: <http://www.wikiaves.com/2591272> Acesso em: 07 Abr 2020.	http://www.wikiaves.com/2591272
Chlorostilbon_lucidus	Malvaviscus arboreus	Robber	Male	yes	Frodoaldo Budke	2013-02-17	2014-11-04	Cascavel/PR	BUDKE, F. (2013). [WA1503858, Chlorostilbon lucidus (Shaw, 1812)]. Wiki Aves - A Enciclopédia das Aves do Brasil.Disponível em: <http://www.wikiaves.com/1503858> Acesso em: 09 Abr 2020.	http://www.wikiaves.com/1503858
Chlorostilbon_lucidus	Malvaviscus arboreus	Robber	Male	yes	Fernando Delgiovo	2015-01-27	2015-01-31	Gravatal/SC	DELGIOVO, F. (2015). [WA1597588, Chlorostilbon lucidus (Shaw, 1812)]. Wiki Aves - A Enciclopédia das Aves do Brasil.Disponível em: <http://www.wikiaves.com/1597588> Acesso em: 09 Abr 2020.	http://www.wikiaves.com/1597588
Chlorostilbon_lucidus	Pachystachys lutea	Robber	Male	No	João Paulo Dalri	2017-12-16	2018-02-27	Americana/SP	DALRI, J. P. (2017). [WA2899141, Chlorostilbon lucidus (Shaw, 1812)]. Wiki Aves - A Enciclopédia das Aves do Brasil.Disponível em: <http://www.wikiaves.com/2899141> Acesso em: 06 Abr 2020.	http://www.wikiaves.com/2899141
Chlorostilbon_lucidus	Pachystachys lutea	Robber	Male	yes	Stephan Pugatch	2017-09-21	2017-09-21	Indaiatuba/SP	PUGATCH, S. K. (2017). [WA2707241, Chlorostilbon lucidus (Shaw, 1812)]. Wiki Aves - A Enciclopédia das Aves do Brasil.Disponível em: <http://www.wikiaves.com/2707241> Acesso em: 06 Abr 2020.	http://www.wikiaves.com/2707241
Chlorostilbon_lucidus	Sanchezia	Robber	Female	yes	Demetrio Lorin	2016-04-02	2016-04-03	Apucarana/PR	LORIN, D. (2016). [WA2074147, Chlorostilbon lucidus (Shaw, 1812)]. Wiki Aves - A Enciclopédia das Aves do Brasil.Disponível em: <http://www.wikiaves.com/2074147> Acesso em: 08 Abr 2020.	http://www.wikiaves.com/2074147
Chlorostilbon_lucidus	Handroanthus	Robber	Female	yes	Reinaldo Barros.	2020-07-05	2020-07-05	Parelhas/RN	SOUSA, R. B. (2020). [WA3865496, Chlorostilbon lucidus (Shaw, 1812)]. Wiki Aves - A Enciclopédia das Aves do Brasil. Disponível em:	http://www.wikiaves.com/3865496
Chlorostilbon_lucidus	Handroanthus	Robber	Male	yes	Reinaldo Barros.	2020-07-05	2020-07-05	Parelhas/RN	SOUSA, R. B. (2020). [WA3865507, Chlorostilbon lucidus (Shaw, 1812)]. Wiki Aves - A Enciclopédia das Aves do Brasil. Disponível em:	http://www.wikiaves.com/3865507
Chlorostilbon_lucidus	Ceiba sp	Robber	Male	yes	Glaucia Pini	2020-05-09	2020-05-10	Campinas/SP	PINI, G. (2020). [WA3793136, Chlorostilbon lucidus (Shaw, 1812)]. Wiki Aves - A Enciclopédia das Aves do Brasil. Disponível em:	http://www.wikiaves.com/3793136
Chlorostilbon_lucidus	Siphocampylus sulfureus	Robber	Male	yes	Andreas Oberhuber	2020-10-18	2021-04-22	Extrema/MG	OBERHUBER, A. (2020). [WA4279888, Chlorostilbon lucidus (Shaw, 1812)]. Wiki Aves - A Enciclopédia das Aves do Brasil. Disponível em:	http://www.wikiaves.com/4279888
Chlorostilbon_lucidus	Cajanus cajan	Robber	Male	yes	Gabriel Rodrigues	2021-03-25	2021-04-13	Socorro/SP	SILVA, G. R. (2021). [WA4268885, Chlorostilbon lucidus (Shaw, 1812)]. Wiki Aves - A Enciclopédia das Aves do Brasil. Disponível em:	http://www.wikiaves.com/4268885
Chlorostilbon_lucidus	Malvaviscus arboreus	Robber	Female	yes	Cícero P. Corrêa	2021-03-27	2021-04-01	Quaraí/RS	CORRÊA, C. A. (2021). [WA4255365, Chlorostilbon lucidus (Shaw, 1812)]. Wiki Aves - A Enciclopédia das Aves do Brasil. Disponível em:	http://www.wikiaves.com/4255365
Chlorostilbon_lucidus	Malvaviscus arboreus	Robber	Male	yes	Teca Resende	2021-03-29	2021-03-30	Lima Duarte/MG	RESENDE, T. C. (2021). [WA4252669, Chlorostilbon lucidus (Shaw, 1812)]. Wiki Aves - A Enciclopédia das Aves do Brasil. Disponível em:	http://www.wikiaves.com/4252669
Chlorostilbon_lucidus	Siphocampylus	Robber	Male	yes	Joelma do Couto	2020-05-26	2021-02-25	Ouro Fino/MG	COUTO, J. (2020). [WA4215349, Chlorostilbon lucidus (Shaw, 1812)]. Wiki Aves - A Enciclopédia das Aves do Brasil. Disponível em:	http://www.wikiaves.com/4215349
Chlorostilbon_lucidus	Abutilon	Robber	Male	yes	Daiane Daneluz	2021-02-13	2021-02-13	Curitiba/PR	DANELUZ, D. M. (2021). [WA4201308, Chlorostilbon lucidus (Shaw, 1812)]. Wiki Aves - A Enciclopédia das Aves do Brasil. Disponível em:	http://www.wikiaves.com/4201308
Chlorostilbon_lucidus	Malvaviscus arboreus	Robber	Female	yes	Marilize Guandalini	2021-02-06	2021-02-07	Curitiba/PR	GUANDALINI, M. (2021). [WA4193867, Chlorostilbon lucidus (Shaw, 1812)]. Wiki Aves - A Enciclopédia das Aves do Brasil. Disponível em:	http://www.wikiaves.com/4193867
Chlorostilbon_lucidus	Hibiscus	Robber	Indeterminado	Not determined	Marcus Sulista	2021-02-03	2021-02-03	Alvorada/RS	RODRIGUES, M. (2021). [WA4189089, Chlorostilbon lucidus (Shaw, 1812)]. Wiki Aves - A Enciclopédia das Aves do Brasil. Disponível em:	http://www.wikiaves.com/4189089
Chlorostilbon_lucidus	Jacaranda mimosifolia	Robber	Male	yes	Manoela Gonsaga	2020-12-25	2020-12-27	Campinas/SP	GONSAGA, M. (2020). [WA4135763, Chlorostilbon lucidus (Shaw, 1812)]. Wiki Aves - A Enciclopédia das Aves do Brasil. Disponível em:	http://www.wikiaves.com/4135763
Chlorostilbon_lucidus	Palicourea rigida	Robber	Male	yes	Manoel Freitas	2020-11-20	2020-11-20	Alto Paraíso de Goiás/GO	REIS, M. F. (2020). [WA4082898, Chlorostilbon lucidus (Shaw, 1812)]. Wiki Aves - A Enciclopédia das Aves do Brasil.Disponível em:	http://www.wikiaves.com/4082898
Chlorostilbon_lucidus	Ipomoea	Robber	Female	yes	Manoel Augusto	2020-10-31	2020-11-19	Chaval/CE	CHAVES, M. A. (2020). [WA4081885, Chlorostilbon lucidus (Shaw, 1812)]. Wiki Aves - A Enciclopédia das Aves do Brasil. Disponível em:	http://www.wikiaves.com/4081885
Chlorostilbon_lucidus	Malvaviscus arboreus	Robber	Indeterminado	Not determined	Sergio T. Almeida	2020-08-13	2020-11-19	Atibaia/SP	ALMEIDA, S. P. (2020). [WA4082167, Chlorostilbon lucidus (Shaw, 1812)]. Wiki Aves - A Enciclopédia das Aves do Brasil. Disponível em:	http://www.wikiaves.com/4082167
Chlorostilbon_lucidus	Sanchezia sp	Robber	Male	Not determined	Camila Tenfen	2020-10-30	2020-11-04	Dois Vizinhos/PR	TENFEN, C. E. (2020). [WA4057227, Chlorostilbon lucidus (Shaw, 1812)]. Wiki Aves - A Enciclopédia das Aves do Brasil. Disponível em:	http://www.wikiaves.com/4057227
Chlorostilbon_lucidus	Handroanthus	Robber	Male	yes	Christine Ahlgrimm	2020-08-29	2020-11-01	Campinas/SP	AHLGRIMM, C. (2020). [WA4050840, Chlorostilbon lucidus (Shaw, 1812)]. Wiki Aves - A Enciclopédia das Aves do Brasil. Disponível em:	http://www.wikiaves.com/4050840
Chlorostilbon_lucidus	Mirabilis jalapa	Robber	Female	yes	Rosiane Silva	2020-10-04	2020-10-29	Monte Sião/MG	SILVA, R. (2020). [WA4045548, Chlorostilbon lucidus (Shaw, 1812)]. Wiki Aves - A Enciclopédia das Aves do Brasil. Disponível em:	http://www.wikiaves.com/4045548
Chlorostilbon_lucidus	Handroanthus	Robber	Male	yes	Ivan Gonçalves	2020-10-23	2020-10-24	Porto Alegre/RS	GONÇALVES, I. P. (2020). [WA4036654, Chlorostilbon lucidus (Shaw, 1812)]. Wiki Aves - A Enciclopédia das Aves do Brasil. Disponível em:	http://www.wikiaves.com/4036654
Chlorostilbon_lucidus	Handroanthus	Robber	Male	yes	Ivan Gonçalves	2020-10-23	2020-10-24	Porto Alegre/RS	GONÇALVES, I. P. (2020). [WA4036655, Chlorostilbon lucidus (Shaw, 1812)]. Wiki Aves - A Enciclopédia das Aves do Brasil. Disponível em:	http://www.wikiaves.com/4036655
Chlorostilbon_lucidus	Malvaviscus arboreus	Robber	Female	yes	Teca Resende	2020-10-19	2020-10-22	Lima Duarte/MG	RESENDE, T. C. (2020). [WA4033487, Chlorostilbon lucidus (Shaw, 1812)]. Wiki Aves - A Enciclopédia das Aves do Brasil. Disponível em:	http://www.wikiaves.com/4033487
Chlorostilbon_lucidus	Ruellia	Robber	Female	yes	Jaelson Gomes	2020-09-18	2020-09-20	Conceição do Coité/BA	GOMES, J. M. (2020). [WA3980521, Chlorostilbon lucidus (Shaw, 1812)]. Wiki Aves - A Enciclopédia das Aves do Brasil. Disponível em:	http://www.wikiaves.com/3980521
Chlorostilbon_lucidus	Handroanthus	Robber	Female	No	Adilson Costa	2020-09-02	2020-09-16	Rio Claro/SP	COSTA, A. D. (2020). [WA3975010, Chlorostilbon lucidus (Shaw, 1812)]. Wiki Aves - A Enciclopédia das Aves do Brasil. Disponível em:	http://www.wikiaves.com/3975010
Chlorostilbon_lucidus	Callianthe striata	Robber	Male	yes	Jorge H. Santos	2020-08-22	2020-09-15	Campo Bom/RS	SANTOS, J. H. (2020). [WA3973961, Chlorostilbon lucidus (Shaw, 1812)]. Wiki Aves - A Enciclopédia das Aves do Brasil. Disponível em:	http://www.wikiaves.com/3973961
Chlorostilbon_lucidus	Erythrina speciosa	Robber	Female	yes	Anderson Oliveira 2	2020-09-06	2020-09-06	Poços de Caldas/MG	OLIVEIRA, A. (2020). [WA3958298, Chlorostilbon lucidus (Shaw, 1812)]. Wiki Aves - A Enciclopédia das Aves do Brasil. Disponível em:	http://www.wikiaves.com/3958298
Chlorostilbon_lucidus	Sinningia	Robber	Male	yes	Marcelo Tonini 2	2020-09-02	2020-09-02	Nova Campina/SP	TONINI, M. (2020). [WA3953606, Chlorostilbon lucidus (Shaw, 1812)]. Wiki Aves - A Enciclopédia das Aves do Brasil. Disponível em:	http://www.wikiaves.com/3953606
Chlorostilbon_lucidus	Handroanthus	Robber	Male	yes	Valmiro Felippe	2020-08-30	2020-08-30	Santa Tereza do Oeste/PR	FELIPPE, V. (2020). [WA3948677, Chlorostilbon lucidus (Shaw, 1812)]. Wiki Aves - A Enciclopédia das Aves do Brasil. Disponível em:	http://www.wikiaves.com/3948677
Chlorostilbon_lucidus	Centrosema	Robber	Female	yes	Ricardo S. Cabral	2020-05-25	2020-05-26	Santana do Seridó/RN	CABRAL, R. H. (2020). [WA3813199, Chlorostilbon lucidus (Shaw, 1812)]. Wiki Aves - A Enciclopédia das Aves do Brasil. Disponível em:	http://www.wikiaves.com/3813199
Chlorostilbon_mellisugus	Anacardium occidentale	Legitimate	Male	yes	Joeldson Habert	2016-03-27	2016-04-06	Normandia/RR	HABERT, J. P. (2016). [WA2076920, Chlorostilbon mellisugus (Linnaeus, 1758)]. Wiki Aves - A Enciclopédia das Aves do Brasil.Disponível em: <http://www.wikiaves.com/2076920> Acesso em: 26 Fev 2020.	http://www.wikiaves.com/2076920
Chlorostilbon_mellisugus	Anacardium occidentale	Legitimate	Female	yes	David Guimarães	2019-08-10	2019-08-25	Rio Branco/AC	GUIMARÃES, D. P. (2019). [WA3467416, Chlorostilbon mellisugus (Linnaeus, 1758)]. Wiki Aves - A Enciclopédia das Aves do Brasil.Disponível em: <http://www.wikiaves.com/3467416> Acesso em: 26 Fev 2020.	http://www.wikiaves.com/3467416
Chlorostilbon_mellisugus	Lantana camara	Legitimate	Female	yes	Jorge Macêdo	2014-07-26	2014-07-29	Amajari/RR	SOUZA, J. M. (2014). [WA1400012, Chlorostilbon mellisugus (Linnaeus, 1758)]. Wiki Aves - A Enciclopédia das Aves do Brasil.Disponível em: <http://www.wikiaves.com/1400012> Acesso em: 26 Fev 2020.	http://www.wikiaves.com/1400012
Chlorostilbon_mellisugus	Lantana camara	Legitimate	Female	yes	David Guimarães	2019-08-10	2019-09-05	Rio Branco/AC	GUIMARÃES, D. P. (2019). [WA3480402, Chlorostilbon mellisugus (Linnaeus, 1758)]. Wiki Aves - A Enciclopédia das Aves do Brasil.Disponível em: <http://www.wikiaves.com/3480402> Acesso em: 26 Fev 2020.	http://www.wikiaves.com/3480402
Chlorostilbon_mellisugus	Lantana camara	Legitimate	Female	yes	Wyllyan Alencar	2019-09-18	2019-10-20	Rio Branco/AC	ALENCAR, W. R. (2019). [WA3536272, Chlorostilbon mellisugus (Linnaeus, 1758)]. Wiki Aves - A Enciclopédia das Aves do Brasil.Disponível em: <http://www.wikiaves.com/3536272> Acesso em: 26 Fev 2020.	http://www.wikiaves.com/3536272
Chlorostilbon_mellisugus	Lantana camara	Legitimate	Male	yes	Wyllyan Alencar	2019-09-17	2019-10-21	Rio Branco/AC	ALENCAR, W. R. (2019). [WA3537727, Chlorostilbon mellisugus (Linnaeus, 1758)]. Wiki Aves - A Enciclopédia das Aves do Brasil.Disponível em: <http://www.wikiaves.com/3537727> Acesso em: 26 Fev 2020.	http://www.wikiaves.com/3537727
Chlorostilbon_mellisugus	Palicourea sp.	Legitimate	Male	yes	Marllus Rafael Almeida	2018-10-28	2019-04-30	Cruzeiro do Sul/AC	ALMEIDA, M. R. (2018). [WA3344796, Chlorostilbon mellisugus (Linnaeus, 1758)]. Wiki Aves - A Enciclopédia das Aves do Brasil.Disponível em: <http://www.wikiaves.com/3344796> Acesso em: 26 Fev 2020.	http://www.wikiaves.com/3344796
Chlorostilbon_mellisugus	Coutoubea	Legitimate	Female	yes	Francisco Luz	2015-02-22	2015-07-15	Amajari/RR	LUZ, F. J. (2015). [WA1759259, Chlorostilbon mellisugus (Linnaeus, 1758)]. Wiki Aves - A Enciclopédia das Aves do Brasil.Disponível em: <http://www.wikiaves.com/1759259> Acesso em: 26 Fev 2020.	http://www.wikiaves.com/1759259
Chlorostilbon_mellisugus	Vochysia ferruginea	Legitimate	Male	yes	Eleonora Pinheiro	2012-12-30	2013-01-24	Caracaraí/RR	PINHEIRO, E. (2012). [WA865953, Chlorostilbon mellisugus (Linnaeus, 1758)]. Wiki Aves - A Enciclopédia das Aves do Brasil.Disponível em: <http://www.wikiaves.com/865953> Acesso em: 26 Fev 2020.	http://www.wikiaves.com/865953
Chlorostilbon_mellisugus	Canna indica	Robber	Female	Not determined	Glauko Correa	2017-02-16	2017-02-28	São Félix do Xingu/PA	SILVA, G. C. (2017). [WA2479928, Chlorostilbon mellisugus (Linnaeus, 1758)]. Wiki Aves - A Enciclopédia das Aves do Brasil.Disponível em: <http://www.wikiaves.com/2479928> Acesso em: 26 Fev 2020.	http://www.wikiaves.com/2479928
Chrysolampis_mosquitus	Aechmea	Legitimate	Male	yes	Mateus Gonçalves	2015-11-21	2015-11-23	Poções/BA	SANTOS, M. G. (2015). [WA1922156, Chrysolampis mosquitus (Linnaeus, 1758)]. Wiki Aves - A Enciclopédia das Aves do Brasil.Disponível em: <http://www.wikiaves.com/1922156> Acesso em: 17 Fev 2020.	http://www.wikiaves.com/1922156
Chrysolampis_mosquitus	Caesalpinia pulcherrima	Legitimate	Male	yes	Ed Andrade Júnior	2009-01-18	2009-03-24	Boa Vista/RR	JÚNIOR, E. A. (2009). [WA13222, Chrysolampis mosquitus (Linnaeus, 1758)]. Wiki Aves - A Enciclopédia das Aves do Brasil.Disponível em: <http://www.wikiaves.com/13222> Acesso em: 17 Fev 2020.	http://www.wikiaves.com/13222
Chrysolampis_mosquitus	Clerodendrum speciosissimum	Legitimate	Male	yes	Cleiton Duarte	2013-02-16	2013-06-15	Grossos/RN	DUARTE, C. F. (2013). [WA988321, Chrysolampis mosquitus (Linnaeus, 1758)]. Wiki Aves - A Enciclopédia das Aves do Brasil.Disponível em: <http://www.wikiaves.com/988321> Acesso em: 17 Fev 2020.	http://www.wikiaves.com/988321
Chrysolampis_mosquitus	Zinnia	Legitimate	Male	yes	Stephen Jones	2010-10-13	2010-11-09	lagoa dos Gatos/PE	JONES, S. J. (2010). [WA237284, Chrysolampis mosquitus (Linnaeus, 1758)]. Wiki Aves - A Enciclopédia das Aves do Brasil.Disponível em: <http://www.wikiaves.com/237284> Acesso em: 17 Fev 2020.	http://www.wikiaves.com/237284
Chrysolampis_mosquitus	Grevillea banksii	Legitimate	Male	Not determined	Leonardo Patrial	2008-10-29	2010-01-13	itacaré/BA	PATRIAL, L. W. (2008). [WA99142, Chrysolampis mosquitus (Linnaeus, 1758)]. Wiki Aves - A Enciclopédia das Aves do Brasil.Disponível em: <http://www.wikiaves.com/99142> Acesso em: 17 Fev 2020.	http://www.wikiaves.com/99142
Chrysolampis_mosquitus	Inga	Legitimate	Not determined	Not determined	Sandro Lemos	2018-10-15	2018-12-03	Imperatriz/MA	LEMOS, S. M. (2018). [WA3200821, Chrysolampis mosquitus (Linnaeus, 1758)]. Wiki Aves - A Enciclopédia das Aves do Brasil.Disponível em: <http://www.wikiaves.com/3200821> Acesso em: 17 Fev 2020.	http://www.wikiaves.com/3200821
Chrysolampis_mosquitus	Ixora coccinea	Legitimate	Female	yes	Edésio Felix	2010-06-02	2010-08-09	Mata de São João/BA	OLIVEIRA, E. F. (2010). [WA179389, Chrysolampis mosquitus (Linnaeus, 1758)]. Wiki Aves - A Enciclopédia das Aves do Brasil.Disponível em: <http://www.wikiaves.com/179389> Acesso em: 17 Fev 2020.	http://www.wikiaves.com/179389
Chrysolampis_mosquitus	Lantana camara	Legitimate	Male	yes	Nailson Júnior	2018-05-03	2018-06-11	Potengi/CE	JÚNIOR, N. A. (2018). [WA2983773, Chrysolampis mosquitus (Linnaeus, 1758)]. Wiki Aves - A Enciclopédia das Aves do Brasil.Disponível em: <http://www.wikiaves.com/2983773> Acesso em: 17 Fev 2020.	http://www.wikiaves.com/2983773
Chrysolampis_mosquitus	Lantana camara	Legitimate	Male	yes	Luiz Gonzaga	2019-11-06	2019-11-11	Lagoa dos Gatos/PE	GONZAGA, L. (2019). [WA3567201, Chrysolampis mosquitus (Linnaeus, 1758)]. Wiki Aves - A Enciclopédia das Aves do Brasil.Disponível em: <http://www.wikiaves.com/3567201> Acesso em: 17 Fev 2020.	http://www.wikiaves.com/3567201
Chrysolampis_mosquitus	Lantana camara	Legitimate	Female	yes	Nina Wenoli	2018-04-22	2019-05-23	Potengi/CE	WENÓLI, N. (2018). [WA3365919, Chrysolampis mosquitus (Linnaeus, 1758)]. Wiki Aves - A Enciclopédia das Aves do Brasil.Disponível em: <http://www.wikiaves.com/3365919> Acesso em: 17 Fev 2020.	http://www.wikiaves.com/3365919
Chrysolampis_mosquitus	Lantana camara	Legitimate	Female	yes	Wyllyan Alencar	2019-09-15	2019-10-19	Rio Branco/AC	ALENCAR, W. R. (2019). [WA3535609, Chrysolampis mosquitus (Linnaeus, 1758)]. Wiki Aves - A Enciclopédia das Aves do Brasil.Disponível em: <http://www.wikiaves.com/3535609> Acesso em: 17 Fev 2020.	http://www.wikiaves.com/3535609
Chrysolampis_mosquitus	Lantana camara	Legitimate	Male	yes	Nailson Júnior	2018-05-03	2018-05-27	Potengi/CE	JÚNIOR, N. A. (2018). [WA2983775, Chrysolampis mosquitus (Linnaeus, 1758)]. Wiki Aves - A Enciclopédia das Aves do Brasil.Disponível em: <http://www.wikiaves.com/2983775> Acesso em: 17 Fev 2020.	http://www.wikiaves.com/2983775
Chrysolampis_mosquitus	Lantana camara	Legitimate	Male	No	Andréa Faria Santos	2017-02-16	2017-02-19	Aracruz/ES	SANTOS, A. F. (2017). [WA2471403, Chrysolampis mosquitus (Linnaeus, 1758)]. Wiki Aves - A Enciclopédia das Aves do Brasil.Disponível em: <http://www.wikiaves.com/2471403> Acesso em: 17 Fev 2020.	http://www.wikiaves.com/2471403
Chrysolampis_mosquitus	Lantana camara	Legitimate	Male	yes	Giuberto A Gabriel	2016-12-04	2016-12-04	Aracruz/ES	GABRIEL, G. (2016). [WA2389353, Chrysolampis mosquitus (Linnaeus, 1758)]. Wiki Aves - A Enciclopédia das Aves do Brasil.Disponível em: <http://www.wikiaves.com/2389353> Acesso em: 17 Fev 2020.	http://www.wikiaves.com/2389353
Chrysolampis_mosquitus	Lantana camara	Legitimate	Male	yes	Paulo Lahr	2016-11-23	2016-12-12	Brasilia/DF	LAHR, P. (2016). [WA2378142, Chrysolampis mosquitus (Linnaeus, 1758)]. Wiki Aves - A Enciclopédia das Aves do Brasil.Disponível em: <http://www.wikiaves.com/2378142> Acesso em: 17 Fev 2020.	http://www.wikiaves.com/2378142
Chrysolampis_mosquitus	Lantana camara	Legitimate	Male	yes	Rodrigo Conte	2016-11-20	2016-11-20	Brasilia/DF	CONTE, R. M. (2016). [WA2374527, Chrysolampis mosquitus (Linnaeus, 1758)]. Wiki Aves - A Enciclopédia das Aves do Brasil.Disponível em: <http://www.wikiaves.com/2374527> Acesso em: 17 Fev 2020.	http://www.wikiaves.com/2374527
Chrysolampis_mosquitus	Lantana camara	Legitimate	Male	yes	Aureo Guaitolini	2014-12-22	2015-03-04	Umburatiba/MG	GUAITOLINI, A. C. (2014). [WA1623554, Chrysolampis mosquitus (Linnaeus, 1758)]. Wiki Aves - A Enciclopédia das Aves do Brasil.Disponível em: <http://www.wikiaves.com/1623554> Acesso em: 17 Fev 2020.	http://www.wikiaves.com/1623554
Chrysolampis_mosquitus	Lantana camara	Legitimate	Not determined	Not determined	Laurent Quéno	2015-03-08	2015-03-08	Anapolis/GO	QUÉNO, L. (2015). [WA1632088, Chrysolampis mosquitus (Linnaeus, 1758)]. Wiki Aves - A Enciclopédia das Aves do Brasil.Disponível em: <http://www.wikiaves.com/1632088> Acesso em: 17 Fev 2020.	http://www.wikiaves.com/1632088
Chrysolampis_mosquitus	Lantana camara	Legitimate	Female	Not determined	Stephen Jones	2013-11-16	2013-11-18	Jaqueira/PE	JONES, S. J. (2013). [WA1156945, Chrysolampis mosquitus (Linnaeus, 1758)]. Wiki Aves - A Enciclopédia das Aves do Brasil.Disponível em: <http://www.wikiaves.com/1156945> Acesso em: 17 Fev 2020.	http://www.wikiaves.com/1156945
Chrysolampis_mosquitus	Lantana camara	Legitimate	Male	yes	Robson Czaban	2013-01-27	2013-02-19	Boa Nova/BA	CZABAN, R. E. (2013). [WA890232, Chrysolampis mosquitus (Linnaeus, 1758)]. Wiki Aves - A Enciclopédia das Aves do Brasil.Disponível em: <http://www.wikiaves.com/890232> Acesso em: 17 Fev 2020.	http://www.wikiaves.com/890232
Chrysolampis_mosquitus	Melocactus sp.	Legitimate	Female	yes	Francisco Paludo	2019-01-13	2019-01-24	Boa Nova/BA	PALUDO, F. (2019). [WA3259598, Chrysolampis mosquitus (Linnaeus, 1758)]. Wiki Aves - A Enciclopédia das Aves do Brasil.Disponível em: <http://www.wikiaves.com/3259598> Acesso em: 17 Fev 2020.	http://www.wikiaves.com/3259598
Chrysolampis_mosquitus	Melocactus sp.	Legitimate	Male	yes	Felipe Queiroz	2017-10-06	2017-10-12	Boa Nova/BA	QUEIROZ, F. S. (2017). [WA2732411, Chrysolampis mosquitus (Linnaeus, 1758)]. Wiki Aves - A Enciclopédia das Aves do Brasil.Disponível em: <http://www.wikiaves.com/2732411> Acesso em: 17 Fev 2020.	http://www.wikiaves.com/2732411
Chrysolampis_mosquitus	Melocactus sp.	Legitimate	Male	yes	Rodrigo Bittencourt	2017-10-12	2017-10-18	Boa Nova/BA	BITTENCOURT, R. P. (2017). [WA2741655, Chrysolampis mosquitus (Linnaeus, 1758)]. Wiki Aves - A Enciclopédia das Aves do Brasil.Disponível em: <http://www.wikiaves.com/2741655> Acesso em: 17 Fev 2020.	http://www.wikiaves.com/2741655
Chrysolampis_mosquitus	Melocactus sp.	Legitimate	Male	yes	Jose Raeder	2017-10-24	2017-10-27	Boa Nova/BA	RAEDER, J. (2017). [WA2753486, Chrysolampis mosquitus (Linnaeus, 1758)]. Wiki Aves - A Enciclopédia das Aves do Brasil.Disponível em: <http://www.wikiaves.com/2753486> Acesso em: 17 Fev 2020.	http://www.wikiaves.com/2753486
Chrysolampis_mosquitus	Melocactus sp.	Legitimate	Male	yes	Cristine Prates	2014-10-17	2014-12-05	Boa Nova/BA	PRATES, C. S. (2014). [WA1537321, Chrysolampis mosquitus (Linnaeus, 1758)]. Wiki Aves - A Enciclopédia das Aves do Brasil.Disponível em: <http://www.wikiaves.com/1537321> Acesso em: 17 Fev 2020.	http://www.wikiaves.com/1537321
Chrysolampis_mosquitus	Melocactus sp.	Legitimate	Female	Not determined	Elby Silva	2015-02-06	2015-04-25	Boa Nova/BA	SILVA, E. A. (2015). [WA1674916, Chrysolampis mosquitus (Linnaeus, 1758)]. Wiki Aves - A Enciclopédia das Aves do Brasil.Disponível em: <http://www.wikiaves.com/1674916> Acesso em: 17 Fev 2020.	http://www.wikiaves.com/1674916
Chrysolampis_mosquitus	Melocactus sp.	Legitimate	Female	yes	Júlio Silveira	2013-11-21	2014-01-14	Boa Nova/BA	SILVEIRA, J. C. (2013). [WA1215212, Chrysolampis mosquitus (Linnaeus, 1758)]. Wiki Aves - A Enciclopédia das Aves do Brasil.Disponível em: <http://www.wikiaves.com/1215212> Acesso em: 17 Fev 2020.	http://www.wikiaves.com/1215212
Chrysolampis_mosquitus	Melocactus sp.	Legitimate	Male	yes	Renato Falzoni	2012-01-15	2012-01-28	Boa Nova/BA	FALZONI, R. L. (2012). [WA559147, Chrysolampis mosquitus (Linnaeus, 1758)]. Wiki Aves - A Enciclopédia das Aves do Brasil.Disponível em: <http://www.wikiaves.com/559147> Acesso em: 17 Fev 2020.	http://www.wikiaves.com/559147
Chrysolampis_mosquitus	Melocactus sp.	Legitimate	Male	yes	André Deco Luiz	2010-10-18	2010-10-28	Boa Nova/BA	BRITO, A. L. (2010). [WA228925, Chrysolampis mosquitus (Linnaeus, 1758)]. Wiki Aves - A Enciclopédia das Aves do Brasil.Disponível em: <http://www.wikiaves.com/228925> Acesso em: 17 Fev 2020.	http://www.wikiaves.com/228925
Chrysolampis_mosquitus	Melocactus sp.	Legitimate	Male	yes	Rafael Furtado	2011-01-28	2011-02-05	Boa Nova/BA	FURTADO, R. C. (2011). [WA291627, Chrysolampis mosquitus (Linnaeus, 1758)]. Wiki Aves - A Enciclopédia das Aves do Brasil.Disponível em: <http://www.wikiaves.com/291627> Acesso em: 17 Fev 2020	http://www.wikiaves.com/291627
Chrysolampis_mosquitus	Melocactus sp.	Legitimate	Male	yes	Aditi Jain Chaves	2009-12-22	2010-02-07	Boa Nova/BA	CHAVES, A. J. (2009). [WA106718, Chrysolampis mosquitus (Linnaeus, 1758)]. Wiki Aves - A Enciclopédia das Aves do Brasil.Disponível em: <http://www.wikiaves.com/106718> Acesso em: 17 Fev 2020.	http://www.wikiaves.com/106718
Chrysolampis_mosquitus	Opuntia	Legitimate	Male	yes	Isaac Libório	2018-08-26	2018-08-26	Venturosa/PE	ROCHA, I. L. (2018). [WA3086454, Chrysolampis mosquitus (Linnaeus, 1758)]. Wiki Aves - A Enciclopédia das Aves do Brasil.Disponível em: <http://www.wikiaves.com/3086454> Acesso em: 17 Fev 2020.	http://www.wikiaves.com/3086454
Chrysolampis_mosquitus	Opuntia	Legitimate	Female	Not determined	Carlos Eduardo Nobre	2012-04-18	2012-07-24	Petrolina/PE	ALMEIDA, C. E. (2012). [WA697851, Chrysolampis mosquitus (Linnaeus, 1758)]. Wiki Aves - A Enciclopédia das Aves do Brasil.Disponível em: <http://www.wikiaves.com/697851> Acesso em: 17 Fev 2020.	http://www.wikiaves.com/697851
Chrysolampis_mosquitus	Russelia equisetiformis	Legitimate	Male	yes	Thiago Tolêdo(PassarinhadaPRO)	2013-08-18	2013-08-20	Guaramiranga/CE	SILVA, T. T. (2013). [WA1053834, Chrysolampis mosquitus (Linnaeus, 1758)]. Wiki Aves - A Enciclopédia das Aves do Brasil.Disponível em: <http://www.wikiaves.com/1053834> Acesso em: 17 Fev 2020.	http://www.wikiaves.com/1053834
Chrysolampis_mosquitus	Pseudogynoxys chenopodioides	Legitimate	Male	yes	José Allanderlanio Silva	2020-09-29	2020-10-01	Lagoa dos Gatos/PE	SILVA, J. A. (2020). [WA3999141, Chrysolampis mosquitus (Linnaeus, 1758)]. Wiki Aves - A Enciclopédia das Aves do Brasil. Disponível em:	http://www.wikiaves.com/3999141
Chrysolampis_mosquitus	Lantana camara	Legitimate	Male	No	Elaine Quirelli	2020-10-20	2020-10-21	Ibicoara/BA	QUIRELLI, E. (2020). [WA4031207, Chrysolampis mosquitus (Linnaeus, 1758)]. Wiki Aves - A Enciclopédia das Aves do Brasil. Disponível em:	http://www.wikiaves.com/4031207
Chrysolampis_mosquitus	Iochroma arborescens	Legitimate	Male	yes	Gustavo Henrique Silveira	2020-10-16	2020-11-14	Iguaí/BA	SILVEIRA, G. H. (2020). [WA4074639, Chrysolampis mosquitus (Linnaeus, 1758)]. Wiki Aves - A Enciclopédia das Aves do Brasil. Disponível em:	http://www.wikiaves.com/4074639
Chrysolampis_mosquitus	Cnidoscolus	Legitimate	Female	yes	Francisco Dutra	2020-11-26	2020-12-04	Caraíbas/BA	DUTRA, F. P. (2020). [WA4105040, Chrysolampis mosquitus (Linnaeus, 1758)]. Wiki Aves - A Enciclopédia das Aves do Brasil. Disponível em:	http://www.wikiaves.com/4105040
Chrysolampis_mosquitus	Leguminosae	Legitimate	Male	yes	Wyllyan Alencar	2020-08-26	2020-12-04	Rio Branco/AC	ALENCAR, W. R. (2020). [WA4105128, Chrysolampis mosquitus (Linnaeus, 1758)]. Wiki Aves - A Enciclopédia das Aves do Brasil. Disponível em:	http://www.wikiaves.com/4105128
Chrysolampis_mosquitus	Melocactus	Legitimate	Male	yes	Carmen Lúcia Bays Figueiredo	2020-12-10	2020-12-21	Boa Nova/BA	FIGUEIREDO, C. L. (2020). [WA4128610, Chrysolampis mosquitus (Linnaeus, 1758)]. Wiki Aves - A Enciclopédia das Aves do Brasil. Disponível em:	http://www.wikiaves.com/4128610
Chrysolampis_mosquitus	Lantana camara	Legitimate	Male	yes	Elaine Quirelli	2021-01-09	2021-01-11	Ibicoara/BA	QUIRELLI, E. (2021). [WA4159204, Chrysolampis mosquitus (Linnaeus, 1758)]. Wiki Aves - A Enciclopédia das Aves do Brasil. Disponível em:	http://www.wikiaves.com/4159204
Chrysolampis_mosquitus	Eucalyptus	Legitimate	Male	yes	João Specian	2021-01-10	2021-01-24	Mateiros/TO	SPECIAN, J. (2021). [WA4176980, Chrysolampis mosquitus (Linnaeus, 1758)]. Wiki Aves - A Enciclopédia das Aves do Brasil. Disponível em:	http://www.wikiaves.com/4176980
Chrysolampis_mosquitus	Eucalyptus	Legitimate	Male	yes	João Specian	2021-01-10	2021-01-25	Mateiros/TO	SPECIAN, J. (2021). [WA4176979, Chrysolampis mosquitus (Linnaeus, 1758)]. Wiki Aves - A Enciclopédia das Aves do Brasil. Disponível em:	http://www.wikiaves.com/4176979
Chrysolampis_mosquitus	Inga	Legitimate	Male	yes	Mateus Rauber	2021-03-16	2021-03-18	Sapezal/MT	RAUBER, M. F. (2021). [WA4238636, Chrysolampis mosquitus (Linnaeus, 1758)]. Wiki Aves - A Enciclopédia das Aves do Brasil. Disponível em:	http://www.wikiaves.com/4238636
Chrysolampis_mosquitus	Cnidoscolus	Legitimate	Male	yes	Rosilândia Melo	2021-03-01	2021-03-02	Pio IX/PI	MAIA, R. M. (2021). [WA4220831, Chrysolampis mosquitus (Linnaeus, 1758)]. Wiki Aves - A Enciclopédia das Aves do Brasil. Disponível em:	http://www.wikiaves.com/4220831
Chrysolampis_mosquitus	Ixora	Legitimate	Male	yes	Nivaldo Sales	2021-04-17	2021-04-24	Tejuçuoca/CE	SALES, N. J. (2021). [WA4281748, Chrysolampis mosquitus (Linnaeus, 1758)]. Wiki Aves - A Enciclopédia das Aves do Brasil. Disponível em:	http://www.wikiaves.com/4281748
Chrysolampis_mosquitus	Strophopappus	Legitimate	Male	Not determined	JC Patricio	2021-04-16	2021-05-05	Chapada dos Guimarães/MT	PATRÍCIO, J. C. (2021). [WA4296396, Chrysolampis mosquitus (Linnaeus, 1758)]. Wiki Aves - A Enciclopédia das Aves do Brasil. Disponível em:	http://www.wikiaves.com/4296396
Chrysolampis_mosquitus	Inga	Theft	Male	yes	Ivan Angelo	2015-11-11	2015-12-07	Boa Nova/BA	ANGELO, I. (2015). [WA1938260, Chrysolampis mosquitus (Linnaeus, 1758)]. Wiki Aves - A Enciclopédia das Aves do Brasil.Disponível em: <http://www.wikiaves.com/1938260> Acesso em: 17 Fev 2020.	http://www.wikiaves.com/1938260
Chrysolampis_mosquitus	Inga	Theft	Female	No	Joaquim Barros	2020-10-04	2020-11-03	Porto Franco/MA	BARROS, J. D. (2020). [WA4054703, Chrysolampis mosquitus (Linnaeus, 1758)]. Wiki Aves - A Enciclopédia das Aves do Brasil. Disponível em:	http://www.wikiaves.com/4054703
Chrysolampis_mosquitus	Pachystachys	Robber	Male	yes	Eugênio Oliveira	2020-06-23	2020-08-04	Lagoa Nova/RN	OLIVEIRA, E. S. (2020). [WA3910553, Chrysolampis mosquitus (Linnaeus, 1758)]. Wiki Aves - A Enciclopédia das Aves do Brasil. Disponível em:	http://www.wikiaves.com/3910553
Chrysuronia_leucogaster	Calliandra	Legitimate	Not determined	yes	Gilvan Moreira	2011-08-14	2011-08-17	Salvador/BA	SANTOS, G. M. (2011). [WA420158, Amazilia leucogaster (Gmelin, 1788)]. Wiki Aves - A Enciclopédia das Aves do Brasil.Disponível em: <http://www.wikiaves.com/420158> Acesso em: 24 Set 2019.	http://www.wikiaves.com/420158
Chrysuronia_leucogaster	Ixora coccinea	Legitimate	Not determined	yes	Alexandre Melo	2009-12-29	2011-05-17	Tamandaré/PE	MELO, A. S. (2009). [WA151597, Amazilia leucogaster (Gmelin, 1788)]. Wiki Aves - A Enciclopédia das Aves do Brasil.Disponível em: <http://www.wikiaves.com/151597> Acesso em: 29 Set 2019.	http://www.wikiaves.com/151597
Chrysuronia_leucogaster	Russelia equisetiformis	Legitimate	Male	yes	Arthur Venancio	2018-09-01	2019-07-24	João Pessoa/PB	VENANCIO, A. (2018). [WA3429200, Amazilia leucogaster (Gmelin, 1788)]. Wiki Aves - A Enciclopédia das Aves do Brasil.Disponível em: <http://www.wikiaves.com/3429200> Acesso em: 23 Set 2019.	http://www.wikiaves.com/3429200
Chrysuronia_leucogaster	Sanchezia	Legitimate	Not determined	yes	Sérgio Cedraz	2008-10-04	2010-07-22	Salvador/BA	CEDRAZ, R. S. (2008). [WA169997, Amazilia leucogaster (Gmelin, 1788)]. Wiki Aves - A Enciclopédia das Aves do Brasil.Disponível em: <http://www.wikiaves.com/169997> Acesso em: 29 Set 2019.	http://www.wikiaves.com/169997
Chrysuronia_leucogaster	Lantana camara	Legitimate	Male	yes	Rodrigo Ferronato	2020-07-31	2020-08-07	São João de Pirabas/PA	FERRONATO, R. M. (2020). [WA3913634, Amazilia leucogaster (Gmelin, 1788)]. Wiki Aves - A Enciclopédia das Aves do Brasil. Disponível em:	http://www.wikiaves.com/3913634
Chrysuronia_leucogaster	Alpinia purpurata	Legitimate	Indeterminado	Not determined	Albino Paiva	2020-09-07	2020-09-09	Barra de Santo Antônio/AL	PAIVA, A. P. (2020). [WA3964761, Amazilia leucogaster (Gmelin, 1788)]. Wiki Aves - A Enciclopédia das Aves do Brasil. Disponível em:	http://www.wikiaves.com/3964761
Chrysuronia_leucogaster	Sanchezia	Legitimate	Indeterminado	yes	Thomaz Callado	2021-03-20	2021-03-20	João Pessoa/PB	CALLADO, T. C. (2021). [WA4241142, Amazilia leucogaster (Gmelin, 1788)]. Wiki Aves - A Enciclopédia das Aves do Brasil. Disponível em:	http://www.wikiaves.com/4241142
Chrysuronia_leucogaster	Heliconia bihai	Legitimate	Indeterminado	yes	Thomaz Callado	2021-04-04	2021-04-04	João Pessoa/PB	CALLADO, T. C. (2021). [WA4258077, Amazilia leucogaster (Gmelin, 1788)]. Wiki Aves - A Enciclopédia das Aves do Brasil. Disponível em:	http://www.wikiaves.com/4258077
Chrysuronia_leucogaster	Caesalpinia pulcherrima	Theft	Not determined	Not determined	Gilvanez Almeida	2012-09-19	2012-09-19	Parnamirim/RN	ALMEIDA, G. M. (2012). [WA749537, Amazilia leucogaster (Gmelin, 1788)]. Wiki Aves - A Enciclopédia das Aves do Brasil.Disponível em: <http://www.wikiaves.com/749537> Acesso em: 24 Set 2019.	http://www.wikiaves.com/749537
Chrysuronia_leucogaster	Caesalpinia pulcherrima	Theft	Not determined	yes	Gilvan Moreira	2013-03-24	2013-03-29	Salvador/BA	SANTOS, G. M. (2013). [WA921010, Amazilia leucogaster (Gmelin, 1788)]. Wiki Aves - A Enciclopédia das Aves do Brasil.Disponível em: <http://www.wikiaves.com/921010> Acesso em: 23 Set 2019.	http://www.wikiaves.com/921010
Chrysuronia_leucogaster	Inga	Theft	Not determined	Not determined	Antonio Lemos Maia	2013-01-01	2013-03-27	Aracaju/SE	MAIA, A. L. (2013). [WA919544, Amazilia leucogaster (Gmelin, 1788)]. Wiki Aves - A Enciclopédia das Aves do Brasil. Disponível em: <http://www.wikiaves.com/919544> Acesso em: 23 Set 2019.	http://www.wikiaves.com/919544
Chrysuronia_leucogaster	Heliconia rostrata	Theft	Indeterminado	Not determined	Bárbara Walmsley	2020-07-03	2021-03-24	Camaragibe/PE	LUCENA, B. J. (2020). [WA4246040, Amazilia leucogaster (Gmelin, 1788)]. Wiki Aves - A Enciclopédia das Aves do Brasil. Disponível em:	http://www.wikiaves.com/4246040
Chrysuronia_leucogaster	Handroanthus	Robber	Not determined	yes	Marcel Lucena	2014-09-16	2014-09-16	Fortaleza/CE	LUCENA, M. F. (2014). [WA1453372, Amazilia leucogaster (Gmelin, 1788)]. Wiki Aves - A Enciclopédia das Aves do Brasil.Disponível em: <http://www.wikiaves.com/1453372> Acesso em: 29 Set 2019.	http://www.wikiaves.com/1453372
Chrysuronia_rondoniae	Caesalpinia pulcherrima	Theft	Male	yes	José Paula	2018-11-21	2018-11-24	Campo Novo do Parecis/MT	PAULA, J. L. (2018). [WA3191359, Amazilia rondoniae Ruschi, 1982]. Wiki Aves - A Enciclopédia das Aves do Brasil.Disponível em: <http://www.wikiaves.com/3191359> Acesso em: 02 Out 2019.	http://www.wikiaves.com/3191359
Chrysuronia_versicolor	Antigonon leptopus	Legitimate	Not determined	yes	Diego Murta	2016-05-27	2016-05-29	Serro/MG	OLIVEIRA, D. M. (2016). [WA2136655, Amazilia versicolor (Vieillot, 1818)]. Wiki Aves - A Enciclopédia das Aves do Brasil. Disponível em: <http://www.wikiaves.com/2136655> Acesso em: 10 Set 2019.	http://www.wikiaves.com/2136655
Chrysuronia_versicolor	Callistemon citrinus	Legitimate	Not determined	yes	Amanda Perin Marcon	2014-08-31	2014-08-31	Getúlio Vargas/RS	MARCON, A. P. (2014). [WA1436354, Amazilia versicolor (Vieillot, 1818)]. Wiki Aves - A Enciclopédia das Aves do Brasil.Disponível em: <http://www.wikiaves.com/1436354> Acesso em: 13 Set 2019.	http://www.wikiaves.com/1436354
Chrysuronia_versicolor	Callistemon citrinus	Legitimate	Not determined	yes	Francisco Pizarro	2012-09-09	2012-09-11	Belo Horizonte/MG	PIZARRO, F. J. (2012). [WA741982, Amazilia versicolor (Vieillot, 1818)]. Wiki Aves - A Enciclopédia das Aves do Brasil.Disponível em: <http://www.wikiaves.com/741982> Acesso em: 17 Set 2019.	http://www.wikiaves.com/741982
Chrysuronia_versicolor	Callistemon citrinus	Legitimate	Not determined	yes	Fernando Maia	2012-08-21	2012-09-09	Salesópolis/SP	MAIA, F. M. (2012). [WA739354, Amazilia versicolor (Vieillot, 1818)]. Wiki Aves - A Enciclopédia das Aves do Brasil.Disponível em: <http://www.wikiaves.com/739354> Acesso em: 17 Set 2019.	http://www.wikiaves.com/739354
Chrysuronia_versicolor	Callistemon citrinus	Legitimate	Not determined	yes	Maria Helena Da Silva	2012-09-02	2012-09-03	São Bento do Sapucaí/SP	SILVA, M. H. (2012). [WA734122, Amazilia versicolor (Vieillot, 1818)]. Wiki Aves - A Enciclopédia das Aves do Brasil.Disponível em: <http://www.wikiaves.com/734122> Acesso em: 23 Set 2019.	http://www.wikiaves.com/734122
Chrysuronia_versicolor	Dombeya wallichii	Legitimate	Not determined	yes	Marcelo Schmidt Roberti	2019-06-24	2019-06-24	Jaraguá do Sul/SC	ROBERTI, M. S. (2019). [WA3396582, Amazilia versicolor (Vieillot, 1818)]. Wiki Aves - A Enciclopédia das Aves do Brasil. Disponível em: <http://www.wikiaves.com/3396582> Acesso em: 07 Set 2019.	http://www.wikiaves.com/3396582
Chrysuronia_versicolor	Erythrina speciosa	Legitimate	Not determined	yes	Ricardo Guimarães	2018-09-01	2018-12-28	Santo André/SP	GUIMARÃES, R. H. (2018). [WA3226959, Amazilia versicolor (Vieillot, 1818)]. Wiki Aves - A Enciclopédia das Aves do Brasil. Disponível em: <http://www.wikiaves.com/3226959> Acesso em: 07 Set 2019.	http://www.wikiaves.com/3226959
Chrysuronia_versicolor	Grevillea banksii	Legitimate	Not determined	Not determined	Claudia Soares	2017-04-16	2017-10-02	Itatiaia/RJ	SOARES, C. A. (2017). [WA2720024, Amazilia versicolor (Vieillot, 1818)]. Wiki Aves - A Enciclopédia das Aves do Brasil. Disponível em: <http://www.wikiaves.com/2720024> Acesso em: 07 Set 2019.	http://www.wikiaves.com/2720024
Chrysuronia_versicolor	Grevillea banksii	Legitimate	Not determined	Not determined	Lenira Ciaccio	2013-09-22	2015-10-26	Ubatuba/SP	CIACCIO, L. B. (2013). [WA1886289, Amazilia versicolor (Vieillot, 1818)]. Wiki Aves - A Enciclopédia das Aves do Brasil. Disponível em: <http://www.wikiaves.com/1886289> Acesso em: 09 Set 2019.	http://www.wikiaves.com/1886289
Chrysuronia_versicolor	Grevillea banksii	Legitimate	Not determined	yes	Cecilia Masiero	2012-08-18	2012-08-19	Itirapina/SP	MASIERO, C. (2012). [WA719494, Amazilia versicolor (Vieillot, 1818)]. Wiki Aves - A Enciclopédia das Aves do Brasil.Disponível em: <http://www.wikiaves.com/719494> Acesso em: 23 Set 2019.	http://www.wikiaves.com/719494
Chrysuronia_versicolor	Grevillea banksii	Legitimate	Not determined	yes	Rodolfo Eller Viana	2009-10-16	2009-10-23	São Luiz do Paraitinga/SP	VIANA, R. E. (2009). [WA71658, Amazilia versicolor (Vieillot, 1818)]. Wiki Aves - A Enciclopédia das Aves do Brasil.Disponível em: <http://www.wikiaves.com/71658> Acesso em: 23 Set 2019.	http://www.wikiaves.com/71658
Chrysuronia_versicolor	Inga	Legitimate	Not determined	yes	Fábio Toledo das Dores	2014-10-18	2014-10-27	Salesópolis/SP	DORES, F. T. (2014). [WA1495634, Amazilia versicolor (Vieillot, 1818)]. Wiki Aves - A Enciclopédia das Aves do Brasil.Disponível em: <http://www.wikiaves.com/1495634> Acesso em: 13 Set 2019.	http://www.wikiaves.com/1495634
Chrysuronia_versicolor	Ixora coccinea	Legitimate	Not determined	yes	Marcelo De Barros Pimentel	2017-01-13	2017-01-24	Cairu/BA	PIMENTEL, M. B. (2017). [WA2445470, Amazilia versicolor (Vieillot, 1818)]. Wiki Aves - A Enciclopédia das Aves do Brasil. Disponível em: <http://www.wikiaves.com/2445470> Acesso em: 11 Set 2019.	http://www.wikiaves.com/2445470
Chrysuronia_versicolor	Lantana camara	Legitimate	Not determined	yes	Arthur Goulart	2015-01-04	2015-01-08	Sabinópolis/MG	GOULART, A. M. (2015). [WA1573366, Amazilia versicolor (Vieillot, 1818)]. Wiki Aves - A Enciclopédia das Aves do Brasil.Disponível em: <http://www.wikiaves.com/1573366> Acesso em: 13 Set 2019.	http://www.wikiaves.com/1573366
Chrysuronia_versicolor	Lantana camara	Legitimate	Not determined	yes	Felipe Bittioli R. Gomes	2013-05-06	2013-05-26	Parintins/AM	GOMES, F. B. (2013). [WA970397, Amazilia versicolor (Vieillot, 1818)]. Wiki Aves - A Enciclopédia das Aves do Brasil.Disponível em: <http://www.wikiaves.com/970397> Acesso em: 13 Set 2019.	http://www.wikiaves.com/970397
Chrysuronia_versicolor	Lantana camara	Legitimate	Not determined	yes	Deusdete Pinho	2014-01-12	2014-01-13	Sabinópolis/MG	PINHO, D. B. (2014). [WA1214597, Amazilia versicolor (Vieillot, 1818)]. Wiki Aves - A Enciclopédia das Aves do Brasil.Disponível em: <http://www.wikiaves.com/1214597> Acesso em: 15 Set 2019.	http://www.wikiaves.com/1214597
Chrysuronia_versicolor	Lantana camara	Legitimate	Not determined	yes	Mario Candeias	2011-01-13	2011-10-25	Vitória/ES	DIAS, M. F. (2011). [WA479512, Amazilia versicolor (Vieillot, 1818)]. Wiki Aves - A Enciclopédia das Aves do Brasil.Disponível em: <http://www.wikiaves.com/479512> Acesso em: 23 Set 2019.	http://www.wikiaves.com/479512
Chrysuronia_versicolor	Lantana camara	Legitimate	Not determined	yes	Marcelo Dutra	2011-09-22	2011-09-22	Ilhabela/SP	SILVA, M. D. (2011). [WA450013, Amazilia versicolor (Vieillot, 1818)]. Wiki Aves - A Enciclopédia das Aves do Brasil.Disponível em: <http://www.wikiaves.com/450013> Acesso em: 23 Set 2019.	http://www.wikiaves.com/450013
Chrysuronia_versicolor	Melocactus sp.	Legitimate	Not determined	yes	Pedro Ávila Figueiredo	2012-11-24	2012-11-30	Boa Nova/BA	FIGUEIREDO, P. L. (2012). [WA819318, Amazilia versicolor (Vieillot, 1818)]. Wiki Aves - A Enciclopédia das Aves do Brasil. Disponível em: <http://www.wikiaves.com/819318> Acesso em: 15 Set 2019.	http://www.wikiaves.com/819318
Chrysuronia_versicolor	Odontonema	Legitimate	Not determined	Not determined	Marcos Barbosa e Souza	2013-11-27	2013-12-01	Porto Nacional/TO	SOUZA, M. B. (2013). [WA1171336, Amazilia versicolor (Vieillot, 1818)]. Wiki Aves - A Enciclopédia das Aves do Brasil. Disponível em: <http://www.wikiaves.com/1171336> Acesso em: 18 Set 2019.	http://www.wikiaves.com/1171336
Chrysuronia_versicolor	Streptosolen jamesonii	Legitimate	Not determined	yes	Enio d´Avila	2013-06-07	2013-06-15	Petrópolis/RJ	D´AVILA, E. R. (2013). [WA986124, Amazilia versicolor (Vieillot, 1818)]. Wiki Aves - A Enciclopédia das Aves do Brasil.Disponível em: <http://www.wikiaves.com/986124> Acesso em: 13 Set 2019.	http://www.wikiaves.com/986124
Chrysuronia_versicolor	Callistemon sp	Legitimate	Indeterminado	yes	Weslley Lima	2020-08-16	2020-11-07	Bom Jesus do Amparo/MG	LIMA, W. V. (2020). [WA4062260, Amazilia versicolor (Vieillot, 1818)]. Wiki Aves - A Enciclopédia das Aves do Brasil. Disponível em:	http://www.wikiaves.com/4062260
Chrysuronia_versicolor	Holmskioldia	Legitimate	Indeterminado	yes	Daniel Gasparian	2021-02-27	2021-03-03	Ilhabela/SP	GASPARIAN, D. (2021). [WA4221746, Amazilia versicolor (Vieillot, 1818)]. Wiki Aves - A Enciclopédia das Aves do Brasil. Disponível em:	http://www.wikiaves.com/4221746
Chrysuronia_versicolor	Holmskioldia	Legitimate	Indeterminado	yes	Daniel Gasparian	2021-02-27	2021-03-03	Ilhabela/SP	GASPARIAN, D. (2021). [WA4221743, Amazilia versicolor (Vieillot, 1818)]. Wiki Aves - A Enciclopédia das Aves do Brasil. Disponível em:	http://www.wikiaves.com/4221743
Chrysuronia_versicolor	Erythrina speciosa	Legitimate	Indeterminado	yes	Jonatas John	2020-07-29	2021-03-11	São Sebastião/SP	FRANCISCO, J. J. (2020). [WA4229755, Amazilia versicolor (Vieillot, 1818)]. Wiki Aves - A Enciclopédia das Aves do Brasil. Disponível em:	http://www.wikiaves.com/4229755
Chrysuronia_versicolor	Callistemon sp	Legitimate	Indeterminado	yes	Rodrigo Scarpa	2021-04-10	2021-04-10	Cabreúva/SP	SCARPA, R. A. (2021). [WA4264922, Amazilia versicolor (Vieillot, 1818)]. Wiki Aves - A Enciclopédia das Aves do Brasil. Disponível em:	http://www.wikiaves.com/4264922
Chrysuronia_versicolor	Lippia	Legitimate	Indeterminado	yes	Rogério de Castro	2020-06-27	2020-07-05	Cocalzinho de Goiás/GO	CASTRO, R. (2020). [WA3865525, Amazilia versicolor (Vieillot, 1818)]. Wiki Aves - A Enciclopédia das Aves do Brasil. Disponível em:	http://www.wikiaves.com/3865525
Chrysuronia_versicolor	Bougainvillea sp	Legitimate	Indeterminado	yes	Sayonara Cometti	2020-06-14	2020-06-14	João Neiva/ES	COMETTI, S. I. (2020). [WA3838395, Amazilia versicolor (Vieillot, 1818)]. Wiki Aves - A Enciclopédia das Aves do Brasil. Disponível em:	http://www.wikiaves.com/3838395
Chrysuronia_versicolor	Prunus	Legitimate	Indeterminado	yes	Glauco Tonello	2020-08-29	2020-09-02	Campos do Jordão/SP	TONELLO, G. E. (2020). [WA3953301, Amazilia versicolor (Vieillot, 1818)]. Wiki Aves - A Enciclopédia das Aves do Brasil. Disponível em:	http://www.wikiaves.com/3953301
Chrysuronia_versicolor	Abutilon megapotamicum	Legitimate	Indeterminado	yes	Alberto Tamashiro	2020-08-28	2020-09-02	Campos do Jordão/SP	TAMASHIRO, A. (2020). [WA3953551, Amazilia versicolor (Vieillot, 1818)]. Wiki Aves - A Enciclopédia das Aves do Brasil. Disponível em:	http://www.wikiaves.com/3953551
Chrysuronia_versicolor	Abutilon megapotamicum	Legitimate	Indeterminado	yes	Alberto Tamashiro	2020-08-28	2020-09-02	Campos do Jordão/SP	TAMASHIRO, A. (2020). [WA3953549, Amazilia versicolor (Vieillot, 1818)]. Wiki Aves - A Enciclopédia das Aves do Brasil. Disponível em:	http://www.wikiaves.com/3953549
Chrysuronia_versicolor	Helicteres	Legitimate	Indeterminado	yes	Andre Siade	2020-09-30	2020-10-02	Santo Antônio do Descoberto/GO	SIADE, A. (2020). [WA3999928, Amazilia versicolor (Vieillot, 1818)]. Wiki Aves - A Enciclopédia das Aves do Brasil. Disponível em:	http://www.wikiaves.com/3999928
Chrysuronia_versicolor	Calliandra	Legitimate	Indeterminado	yes	Guillermo Andreo	2020-10-12	2020-10-13	Maquiné/RS	ANDREO, G. (2020). [WA4016982, Amazilia versicolor (Vieillot, 1818)]. Wiki Aves - A Enciclopédia das Aves do Brasil. Disponível em:	http://www.wikiaves.com/4016982
Chrysuronia_versicolor	Citrus	Legitimate	Indeterminado	yes	Guillermo Andreo	2020-10-27	2020-10-28	Maquiné/RS	ANDREO, G. (2020). [WA4044730, Amazilia versicolor (Vieillot, 1818)]. Wiki Aves - A Enciclopédia das Aves do Brasil.Disponível em:	http://www.wikiaves.com/4044730
Chrysuronia_versicolor	Bauhinia sp	Theft	Male	yes	Valmir Luciano Nicolletti	2021-01-24	2021-01-24	São Bento do Sul/SC	NICOLLETTI, V. L. (2021). [WA4176912, Amazilia versicolor (Vieillot, 1818)]. Wiki Aves - A Enciclopédia das Aves do Brasil. Disponível em:	http://www.wikiaves.com/4176912
Chrysuronia_versicolor	Malvaviscus arboreus	Robber	Indeterminado	Not determined	Rafael Bordalo	2020-08-23	2020-08-24	Resende/RJ	BORDALO, R. S. (2020). [WA3938768, Amazilia versicolor (Vieillot, 1818)]. Wiki Aves - A Enciclopédia das Aves do Brasil. Disponível em:	http://www.wikiaves.com/3938768
Chrysuronia_versicolor	Spathodea campanulata	Robber	Indeterminado	yes	Rafael Bordalo	2020-09-19	2020-09-19	Resende/RJ	BORDALO, R. S. (2020). [WA3978259, Amazilia versicolor (Vieillot, 1818)]. Wiki Aves - A Enciclopédia das Aves do Brasil. Disponível em:	http://www.wikiaves.com/3978259
Chrysuronia_versicolor	Musa	Robber	Indeterminado	yes	Patrícia Hanate	2020-10-17	2020-10-18	Cubatão/SP	HANATE, P. H. (2020). [WA4026617, Amazilia versicolor (Vieillot, 1818)]. Wiki Aves - A Enciclopédia das Aves do Brasil. Disponível em:	http://www.wikiaves.com/4026617
Colibri_delphinae	Calliandra	Legitimate	Male	yes	Thalison Ribeiro	2014-03-25	2014-03-25	Mucugê/BA	RIBEIRO, T. S. (2014). [WA1645418, Colibri delphinae (Lesson, 1839)]. Wiki Aves - A Enciclopédia das Aves do Brasil.Disponível em: <http://www.wikiaves.com/1645418> Acesso em: 10 Fev 2020.	http://www.wikiaves.com/1645418
Colibri_delphinae	Calliandra	Legitimate	Not determined	yes	Luiz Ribenboim	2017-01-12	2017-09-29	Mucugê/BA	RIBENBOIM, L. C. (2017). [WA2716386, Colibri delphinae (Lesson, 1839)]. Wiki Aves - A Enciclopédia das Aves do Brasil.Disponível em: <http://www.wikiaves.com/2716386> Acesso em: 10 Fev 2020.	http://www.wikiaves.com/2716386
Colibri_delphinae	Calliandra	Legitimate	Not determined	yes	Geiser Trivelato	2017-01-15	2017-01-17	Mucugê/BA	TRIVELATO, G. P. (2017). [WA2438446, Colibri delphinae (Lesson, 1839)]. Wiki Aves - A Enciclopédia das Aves do Brasil.Disponível em: <http://www.wikiaves.com/2438446> Acesso em: 10 Fev 2020.	http://www.wikiaves.com/2438446
Colibri_delphinae	Vochysia pyramidalis	Legitimate	Not determined	Not determined	Charles Almeida	2014-01-17	2015-07-06	Andaraí/BA	CHARLES, C. D. (2014). [WA1748419, Colibri delphinae (Lesson, 1839)]. Wiki Aves - A Enciclopédia das Aves do Brasil.Disponível em: <http://www.wikiaves.com/1748419> Acesso em: 10 Fev 2020.	http://www.wikiaves.com/1748419
Colibri_serrirostris	Callistemon citrinus	Legitimate	Male	yes	Márcia Giovani	2019-07-14	2019-07-20	Andrelândia/MG	PORTO, M. A. (2019). [WA3425354, Colibri serrirostris (Vieillot, 1816)]. Wiki Aves - A Enciclopédia das Aves do Brasil.Disponível em: <http://www.wikiaves.com/3425354> Acesso em: 11 Fev 2020	http://www.wikiaves.com/3425354
Colibri_serrirostris	Grevillea banksii	Legitimate	Male	yes	Antonio Carlos Iglesias	2019-01-01	2019-01-01	São Bento do Sapucaí/SP	IGLESIAS, A. C. (2019). [WA3231597, Colibri serrirostris (Vieillot, 1816)]. Wiki Aves - A Enciclopédia das Aves do Brasil.Disponível em: <http://www.wikiaves.com/3231597> Acesso em: 11 Fev 2020.	http://www.wikiaves.com/3231597
Colibri_serrirostris	Inga	Legitimate	Male	yes	Flávio Benites	2019-01-19	2019-01-20	Rio Preto/MG	BENITES, F. R. (2019). [WA3255475, Colibri serrirostris (Vieillot, 1816)]. Wiki Aves - A Enciclopédia das Aves do Brasil.Disponível em: <http://www.wikiaves.com/3255475> Acesso em: 11 Fev 2020.	http://www.wikiaves.com/3255475
Colibri_serrirostris	Lantana camara	Legitimate	Male	yes	Carlos Correia	2019-03-17	2019-03-18	Brasília/DF	CORREIA, C. A. (2019). [WA3308017, Colibri serrirostris (Vieillot, 1816)]. Wiki Aves - A Enciclopédia das Aves do Brasil.Disponível em: <http://www.wikiaves.com/3308017> Acesso em: 11 Fev 2020.	http://www.wikiaves.com/3308017
Colibri_serrirostris	Lantana camara	Legitimate	Female	yes	Ricardo R. Alves	2019-03-23	2019-03-25	Brasília/DF	ALVES, R. R. (2019). [WA3313673, Colibri serrirostris (Vieillot, 1816)]. Wiki Aves - A Enciclopédia das Aves do Brasil.Disponível em: <http://www.wikiaves.com/3313673> Acesso em: 11 Fev 2020.	http://www.wikiaves.com/3313673
Colibri_serrirostris	Lantana camara	Legitimate	Male	yes	Rogério de Castro	2019-03-23	2019-03-29	Brasília/DF	CASTRO, R. (2019). [WA3312006, Colibri serrirostris (Vieillot, 1816)]. Wiki Aves - A Enciclopédia das Aves do Brasil.Disponível em: <http://www.wikiaves.com/3312006> Acesso em: 11 Fev 2020.	http://www.wikiaves.com/3312006
Colibri_serrirostris	Leonotis nepetifolia	Legitimate	Not determined	yes	Luiz Motta	2019-06-22	2019-06-23	Cocalzinho de Goiás/GO	MOTTA, L. G. (2019). [WA3395830, Colibri serrirostris (Vieillot, 1816)]. Wiki Aves - A Enciclopédia das Aves do Brasil.Disponível em: <http://www.wikiaves.com/3395830> Acesso em: 11 Fev 2020.	http://www.wikiaves.com/3395830
Colibri_serrirostris	Luehea	Legitimate	Not determined	yes	Jairo Souza Jr	2018-02-07	2019-09-20	Araxá/MG	SOUZA, J. (2018). [WA3497431, Colibri serrirostris (Vieillot, 1816)]. Wiki Aves - A Enciclopédia das Aves do Brasil.Disponível em: <http://www.wikiaves.com/3497431> Acesso em: 11 Fev 2020.	http://www.wikiaves.com/3497431
Colibri_serrirostris	Russelia equisetiformis	Legitimate	Male	yes	Rogério de Castro	2020-01-08	2020-01-09	Brasília/DF	CASTRO, R. (2020). [WA3637771, Colibri serrirostris (Vieillot, 1816)]. Wiki Aves - A Enciclopédia das Aves do Brasil.Disponível em: <http://www.wikiaves.com/3637771> Acesso em: 11 Fev 2020.	http://www.wikiaves.com/3637771
Colibri_serrirostris	Russelia equisetiformis	Legitimate	Male	yes	Clenia Farias	2020-01-11	2020-01-12	Brasília/DF	FARIAS, C. L. (2020). [WA3641793, Colibri serrirostris (Vieillot, 1816)]. Wiki Aves - A Enciclopédia das Aves do Brasil.Disponível em: <http://www.wikiaves.com/3641793> Acesso em: 11 Fev 2020.	http://www.wikiaves.com/3641793
Colibri_serrirostris	Russelia equisetiformis	Legitimate	Not determined	Not determined	Regina Cardozo	2015-03-08	2018-12-11	Chapada dos Guimarães/MT	CARDOZO, R. M. (2015). [WA3209748, Colibri serrirostris (Vieillot, 1816)]. Wiki Aves - A Enciclopédia das Aves do Brasil.Disponível em: <http://www.wikiaves.com/3209748> Acesso em: 11 Fev 2020.	http://www.wikiaves.com/3209748
Colibri_serrirostris	Salvia	Legitimate	Not determined	yes	Claudia Moura	2018-12-02	2019-02-04	Brasília/DF	BENITA (2018). [WA3271550, Colibri serrirostris (Vieillot, 1816)]. Wiki Aves - A Enciclopédia das Aves do Brasil.Disponível em: <http://www.wikiaves.com/3271550> Acesso em: 11 Fev 2020.	http://www.wikiaves.com/3271550
Colibri_serrirostris	Salvia	Legitimate	Female	yes	Rodrigo Pertoti	2018-11-16	2019-01-04	Brasília/DF	PERTOTI, R. (2018). [WA3234788, Colibri serrirostris (Vieillot, 1816)]. Wiki Aves - A Enciclopédia das Aves do Brasil.Disponível em: <http://www.wikiaves.com/3234788> Acesso em: 11 Fev 2020.	http://www.wikiaves.com/3234788
Colibri_serrirostris	Bromeliaceae	Legitimate	Female	yes	André Pellanda	2019-02-09	2019-02-09	Guarapari/ES	SOUZA, A. P. (2019). [WA3275581, Colibri serrirostris (Vieillot, 1816)]. Wiki Aves - A Enciclopédia das Aves do Brasil.Disponível em: <http://www.wikiaves.com/3275581> Acesso em: 11 Fev 2020.	http://www.wikiaves.com/3275581
Colibri_serrirostris	Ceiba sp	Legitimate	Male	yes	Marco Túlio Vilaça	2021-03-27	2021-03-27	Pará de Minas/MG	TÔRRES, M. T. (2021). [WA4249363, Colibri serrirostris (Vieillot, 1816)]. Wiki Aves - A Enciclopédia das Aves do Brasil. Disponível em:	http://www.wikiaves.com/4249363
Colibri_serrirostris	Callistemon sp	Legitimate	Female	No	Fred Crema	2021-02-03	2021-02-26	Lima Duarte/MG	LEIS, F. C. (2021). [WA4215856, Colibri serrirostris (Vieillot, 1816)]. Wiki Aves - A Enciclopédia das Aves do Brasil. Disponível em:	http://www.wikiaves.com/4215856
Colibri_serrirostris	Zinnia elegans	Legitimate	Male	yes	Samuel de Paula Andrade	2021-01-28	2021-01-31	Andrelândia/MG	ANDRADE, S. P. (2021). [WA4184778, Colibri serrirostris (Vieillot, 1816)]. Wiki Aves - A Enciclopédia das Aves do Brasil. Disponível em:	http://www.wikiaves.com/4184778
Colibri_serrirostris	Crocosmia	Legitimate	Male	yes	Antonio Carlos Iglesias	2021-01-24	2021-01-25	São Bento do Sapucaí/SP	IGLESIAS, A. C. (2021). [WA4177508, Colibri serrirostris (Vieillot, 1816)]. Wiki Aves - A Enciclopédia das Aves do Brasil. Disponível em:	http://www.wikiaves.com/4177508
Colibri_serrirostris	Streptosolen jamesonii	Legitimate	Male	yes	Antonio Carlos Iglesias	2021-01-24	2021-01-25	São Bento do Sapucaí/SP	IGLESIAS, A. C. (2021). [WA4177504, Colibri serrirostris (Vieillot, 1816)]. Wiki Aves - A Enciclopédia das Aves do Brasil. Disponível em:	http://www.wikiaves.com/4177504
Colibri_serrirostris	Sinningia	Legitimate	Male	yes	Rogerio Levighini	2020-10-30	2021-01-24	Pouso Alegre/MG	LEVIGHINI, R. (2020). [WA4176248, Colibri serrirostris (Vieillot, 1816)]. Wiki Aves - A Enciclopédia das Aves do Brasil. Disponível em:	http://www.wikiaves.com/4176248
Colibri_serrirostris	Glandularia	Legitimate	Indeterminado	Not determined	Davi de Paula	2020-10-23	2020-12-10	Andrelândia/MG	ANDRADE, D. P. (2020). [WA4112902, Colibri serrirostris (Vieillot, 1816)]. Wiki Aves - A Enciclopédia das Aves do Brasil. Disponível em:	http://www.wikiaves.com/4112902
Colibri_serrirostris	Stachytarpheta sp	Legitimate	Male	yes	Leonardo Marujo	2020-11-01	2020-12-07	Belo Horizonte/MG	MARUJO, L. S. (2020). [WA4090752, Colibri serrirostris (Vieillot, 1816)]. Wiki Aves - A Enciclopédia das Aves do Brasil. Disponível em:	http://www.wikiaves.com/4090752
Colibri_serrirostris	Sinningia	Legitimate	Male	yes	Alberto Tamashiro	2020-11-14	2020-11-15	Pouso Alegre/MG	TAMASHIRO, A. (2020). [WA4075197, Colibri serrirostris (Vieillot, 1816)]. Wiki Aves - A Enciclopédia das Aves do Brasil. Disponível em:	http://www.wikiaves.com/4075197
Colibri_serrirostris	Grevillea banksii	Legitimate	Male	yes	Antonio Carlos Iglesias	2020-11-29	2020-11-29	São Bento do Sapucaí/SP	IGLESIAS, A. C. (2020). [WA4097422, Colibri serrirostris (Vieillot, 1816)]. Wiki Aves - A Enciclopédia das Aves do Brasil. Disponível em:	http://www.wikiaves.com/4097422
Colibri_serrirostris	Grevillea banksii	Legitimate	Male	yes	Antonio Carlos Iglesias	2020-11-15	2020-11-19	São Bento do Sapucaí/SP	IGLESIAS, A. C. (2020). [WA4081490, Colibri serrirostris (Vieillot, 1816)]. Wiki Aves - A Enciclopédia das Aves do Brasil. Disponível em:	http://www.wikiaves.com/4081490
Colibri_serrirostris	Sinningia	Legitimate	Female	yes	Alberto Tamashiro	2020-11-06	2020-11-07	Pouso Alegre/MG	TAMASHIRO, A. (2020). [WA4062668, Colibri serrirostris (Vieillot, 1816)]. Wiki Aves - A Enciclopédia das Aves do Brasil. Disponível em:	http://www.wikiaves.com/4062668
Colibri_serrirostris	Sinningia	Legitimate	Male	yes	Kleber Silveira	2020-11-06	2020-11-10	Pouso Alegre/MG	SILVEIRA, K. A. (2020). [WA4067994, Colibri serrirostris (Vieillot, 1816)]. Wiki Aves - A Enciclopédia das Aves do Brasil. Disponível em:	http://www.wikiaves.com/4067994
Colibri_serrirostris	Sinningia	Legitimate	Male	Not determined	Vilma Oliveira	2020-11-04	2020-11-04	Ilhabela/SP	OLIVEIRA, V. (2020). [WA4057151, Colibri serrirostris (Vieillot, 1816)]. Wiki Aves - A Enciclopédia das Aves do Brasil. Disponível em:	http://www.wikiaves.com/4057151
Colibri_serrirostris	Sinningia	Legitimate	Indeterminado	Not determined	Maria V. Silva	2020-10-23	2020-10-29	Ilhabela/SP	SILVA, M. M. (2020). [WA4046975, Colibri serrirostris (Vieillot, 1816)]. Wiki Aves - A Enciclopédia das Aves do Brasil. Disponível em:	http://www.wikiaves.com/4046975
Colibri_serrirostris	Sinningia	Legitimate	Male	yes	José Nélio Miranda	2020-10-28	2020-10-29	Pouso Alegre/MG	JOSENELIO (2020). [WA4045940, Colibri serrirostris (Vieillot, 1816)]. Wiki Aves - A Enciclopédia das Aves do Brasil. Disponível em:	http://www.wikiaves.com/4045940
Colibri_serrirostris	Sinningia	Legitimate	Male	yes	Fernando Moraes Rebouças	2020-10-10	2020-10-10	Ilhabela/SP	MORAES, F. (2020). [WA4010805, Colibri serrirostris (Vieillot, 1816)]. Wiki Aves - A Enciclopédia das Aves do Brasil. Disponível em:	http://www.wikiaves.com/4010805
Colibri_serrirostris	Bougainvillea sp	Legitimate	Female	yes	Lawrence Rabelo De Almeida	2020-09-09	2020-09-12	Lagoa Formosa/MG	ALMEIDA, L. R. (2020). [WA3967776, Colibri serrirostris (Vieillot, 1816)]. Wiki Aves - A Enciclopédia das Aves do Brasil. Disponível em:	http://www.wikiaves.com/3967776
Colibri_serrirostris	Grevillea banksii	Legitimate	Male	yes	Antonio Carlos Iglesias	2020-08-24	2020-08-30	São Bento do Sapucaí/SP	IGLESIAS, A. C. (2020). [WA3947158, Colibri serrirostris (Vieillot, 1816)]. Wiki Aves - A Enciclopédia das Aves do Brasil. Disponível em:	http://www.wikiaves.com/3947158
Colibri_serrirostris	Leonotis nepetifolia	Legitimate	Male	yes	Andre Siade	2020-07-10	2020-08-06	Cocalzinho de Goiás/GO	SIADE, A. (2020). [WA3912166, Colibri serrirostris (Vieillot, 1816)]. Wiki Aves - A Enciclopédia das Aves do Brasil. Disponível em:	http://www.wikiaves.com/3912166
Colibri_serrirostris	Lippia	Legitimate	Indeterminado	No	Gláucio Freitas	2020-07-19	2020-07-20	Cocalzinho de Goiás/GO	SILVA, G. F. (2020). [WA3886028, Colibri serrirostris (Vieillot, 1816)]. Wiki Aves - A Enciclopédia das Aves do Brasil. Disponível em:	http://www.wikiaves.com/3886028
Colibri_serrirostris	Siphocampylus	Legitimate	Female	yes	Anderson Oliveira 2	2020-07-11	2020-07-11	Poços de Caldas/MG	OLIVEIRA, A. (2020). [WA3872586, Colibri serrirostris (Vieillot, 1816)]. Wiki Aves - A Enciclopédia das Aves do Brasil. Disponível em:	http://www.wikiaves.com/3872586
Colibri_serrirostris	Abutilon	Legitimate	Male	yes	Manoel Freitas	2020-06-25	2020-06-26	Botumirim/MG	REIS, M. F. (2020). [WA3853791, Colibri serrirostris (Vieillot, 1816)]. Wiki Aves - A Enciclopédia das Aves do Brasil. Disponível em:	http://www.wikiaves.com/3853791
Colibri_serrirostris	Siphocampylus	Legitimate	Male	yes	Lucas Madeira	2020-06-04	2020-06-06	Ouro Preto/MG	MADEIRA, L. F. (2020). [WA3833305, Colibri serrirostris (Vieillot, 1816)]. Wiki Aves - A Enciclopédia das Aves do Brasil. Disponível em:	http://www.wikiaves.com/3833305
Colibri_serrirostris	Grevillea banksii	Legitimate	Female	yes	Antonio Carlos Iglesias	2020-06-07	2020-06-07	São Bento do Sapucaí/SP	IGLESIAS, A. C. (2020). [WA3828027, Colibri serrirostris (Vieillot, 1816)]. Wiki Aves - A Enciclopédia das Aves do Brasil. Disponível em:	http://www.wikiaves.com/3828027
Colibri_serrirostris	Calliandra	Theft	Female	yes	Margi Moss	2017-04-23	2019-03-24	Brasília/DF	MOSS, M. (2017). [WA3312593, Colibri serrirostris (Vieillot, 1816)]. Wiki Aves - A Enciclopédia das Aves do Brasil.Disponível em: <http://www.wikiaves.com/3312593> Acesso em: 11 Fev 2020.	http://www.wikiaves.com/3312593
Colibri_serrirostris	Bauhinia purpurea	Theft	Male	yes	Matheus Henrique	2019-07-26	2019-07-30	São Sebastião do Paraíso/MG	REIS, M. H. (2019). [WA3437943, Colibri serrirostris (Vieillot, 1816)]. Wiki Aves - A Enciclopédia das Aves do Brasil.Disponível em: <http://www.wikiaves.com/3437943> Acesso em: 11 Fev 2020.	http://www.wikiaves.com/3437943
Colibri_serrirostris	Vochysia tucanorum	Theft	Male	No	Daniel Mello	2020-11-27	2020-12-13	Carrancas/MG	MELLO, D. J. (2020). [WA4117082, Colibri serrirostris (Vieillot, 1816)]. Wiki Aves - A Enciclopédia das Aves do Brasil. Disponível em:	http://www.wikiaves.com/4117082
Colibri_serrirostris	Qualea parviflora	Theft	Indeterminado	Not determined	Luiz Mendonça	2020-11-08	2020-11-14	Cachoeira de Goiás/GO	MENDONÇA, L. G. (2020). [WA4074384, Colibri serrirostris (Vieillot, 1816)]. Wiki Aves - A Enciclopédia das Aves do Brasil. Disponível em:	http://www.wikiaves.com/4074384
Colibri_serrirostris	Inga	Theft	Male	yes	Miguel Veronez	2020-08-27	2020-08-28	Franca/SP	VERONEZ, M. (2020). [WA3944575, Colibri serrirostris (Vieillot, 1816)]. Wiki Aves - A Enciclopédia das Aves do Brasil. Disponível em:	http://www.wikiaves.com/3944575
Colibri_serrirostris	Echeveria	Theft	Female	yes	Norica Iglesias	2020-08-19	2020-08-20	São Bento do Sapucaí/SP	IGLESIAS, N. H. (2020). [WA3933545, Colibri serrirostris (Vieillot, 1816)]. Wiki Aves - A Enciclopédia das Aves do Brasil. Disponível em:	http://www.wikiaves.com/3933545
Colibri_serrirostris	Malvaviscus arboreus	Robber	Female	yes	Eduardo Bom	2018-12-25	2019-01-14	Ibiúna/SP	BOM, E. (2018). [WA3247816, Colibri serrirostris (Vieillot, 1816)]. Wiki Aves - A Enciclopédia das Aves do Brasil.Disponível em: <http://www.wikiaves.com/3247816> Acesso em: 11 Fev 2020.	http://www.wikiaves.com/3247816
Colibri_serrirostris	Salvia	Robber	Female	yes	Clenia Farias	2018-12-08	2018-12-09	Brasília/DF	FARIAS, C. L. (2018). [WA3207391, Colibri serrirostris (Vieillot, 1816)]. Wiki Aves - A Enciclopédia das Aves do Brasil.Disponível em: <http://www.wikiaves.com/3207391> Acesso em: 11 Fev 2020.	http://www.wikiaves.com/3207391
Discosura_langsdorffi	Luehea	Legitimate	Female	yes	Emerson Kaseker	2016-06-11	2016-06-15	Machadinho d'Oeste/RO	KASEKER, E. P. (2016). [WA2588572, Discosura langsdorffi (Temminck, 1821)]. Wiki Aves - A Enciclopédia das Aves do Brasil.Disponível em: <http://www.wikiaves.com/2588572> Acesso em: 20 Fev 2020.	http://www.wikiaves.com/2588572
Discosura_longicaudus	Tachigali (Fabaceae)	Legitimate	Female	yes	Luiz Fernando Carvalho	2016-10-31	2016-12-12	Manaus/AM	CARVALHO, L. F. (2016). [WA2396827, Discosura longicaudus (Gmelin, 1788)]. Wiki Aves - A Enciclopédia das Aves do Brasil.Disponível em: <http://www.wikiaves.com/2396827> Acesso em: 26 Fev 2020.	http://www.wikiaves.com/2396827
Discosura_longicaudus	Tachigali (Fabaceae)	Legitimate	Female	yes	Anselmo d`Affonseca	2010-10-10	2010-10-10	Manaus/AM	DAFFONSECA, J. A. (2010). [WA217098, Discosura longicaudus (Gmelin, 1788)]. Wiki Aves - A Enciclopédia das Aves do Brasil.Disponível em: <http://www.wikiaves.com/217098> Acesso em: 26 Fev 2020.	http://www.wikiaves.com/217098
Discosura_longicaudus	Tachigali (Fabaceae)	Legitimate	Female	yes	Robson Czaban	2010-11-06	2010-12-26	Manaus/AM	CZABAN, R. E. (2010). [WA266639, Discosura longicaudus (Gmelin, 1788)]. Wiki Aves - A Enciclopédia das Aves do Brasil.Disponível em: <http://www.wikiaves.com/266639> Acesso em: 26 Fev 2020.	http://www.wikiaves.com/266639
Discosura_longicaudus	Grevillea banksii	Legitimate	Not determined	No	Felipe Queiroz	2018-04-08	2018-04-12	Santa Cruz Cabrália/BA	QUEIROZ, F. S. (2018). [WA2938108, Discosura longicaudus (Gmelin, 1788)]. Wiki Aves - A Enciclopédia das Aves do Brasil.Disponível em: <http://www.wikiaves.com/2938108> Acesso em: 26 Fev 2020.	http://www.wikiaves.com/2938108
Discosura_longicaudus	Grevillea banksii	Legitimate	Female	yes	Julio Guedes	2018-04-02	2018-04-13	Santa Cruz Cabrália/BA	FILHO, J. G. (2018). [WA2938663, Discosura longicaudus (Gmelin, 1788)]. Wiki Aves - A Enciclopédia das Aves do Brasil.Disponível em: <http://www.wikiaves.com/2938663> Acesso em: 26 Fev 2020.	http://www.wikiaves.com/2938663
Discosura_longicaudus	Inga	Legitimate	Female	yes	Marlos Menêzes	2015-02-21	2015-02-22	Paulista/PE	MENÊZES, M. J. (2015). [WA1620103, Discosura longicaudus (Gmelin, 1788)]. Wiki Aves - A Enciclopédia das Aves do Brasil.Disponível em: <http://www.wikiaves.com/1620103> Acesso em: 26 Fev 2020.	http://www.wikiaves.com/1620103
Discosura_longicaudus	Couepia	Legitimate	Male	yes	Marco Guedes	2014-11-13	2014-11-29	Santa Cruz Cabrália/BA	PINTO, M. A. (2014). [WA1531025, Discosura longicaudus (Gmelin, 1788)]. Wiki Aves - A Enciclopédia das Aves do Brasil.Disponível em: <http://www.wikiaves.com/1531025> Acesso em: 26 Fev 2020.	http://www.wikiaves.com/1531025
Eupetomena_macroura	Aechmea	Legitimate	Not determined	yes	Emerson Pacheco	2012-07-28	2013-03-05	Matozinhos/MG	PACHECO, E. H. (2012). [WA902230, Eupetomena macroura (Gmelin, 1788)]. Wiki Aves - A Enciclopédia das Aves do Brasil. Disponível em: <http://www.wikiaves.com/902230> Acesso em: 21 Ago 2019.	http://www.wikiaves.com/902230
Eupetomena_macroura	Tecoma stans (L.) Juss. ex Kunth (Bignoniaceae)	Legitimate	Not determined	yes	Ricardo Sousa (Titta)	2000-12-31	2014-03-31	Piracicaba/SP	SOUSA, R. S. (2000). [WA1287839, Eupetomena macroura (Gmelin, 1788)]. Wiki Aves - A Enciclopédia das Aves do Brasil. Disponível em: <http://www.wikiaves.com/1287839> Acesso em: 13 Ago 2019.	http://www.wikiaves.com/1287839
Eupetomena_macroura	Tecoma stans (L.) Juss. ex Kunth (Bignoniaceae)	Legitimate	Male	yes	Eric Gallardo	2009-06-12	2009-06-15	São Francisco/SP	GALLARDO, E. (2009). [WA28823, Eupetomena macroura (Gmelin, 1788)]. Wiki Aves - A Enciclopédia das Aves do Brasil. Disponível em: <http://www.wikiaves.com/28823> Acesso em: 04 Set 2019.	http://www.wikiaves.com/28823
Eupetomena_macroura	Aloe	Legitimate	Not determined	yes	Marcos Melo	2012-05-31	2012-10-11	São Paulo/SP	MELO, M. A. (2012). [WA771123, Eupetomena macroura (Gmelin, 1788)]. Wiki Aves - A Enciclopédia das Aves do Brasil. Disponível em: <http://www.wikiaves.com/771123> Acesso em: 21 Ago 2019.	http://www.wikiaves.com/771123
Eupetomena_macroura	Aloe	Legitimate	Not determined	yes	Agnaldo Mezzini	2011-10-04	2011-10-22	Iracemápolis/SP	MEZZINI, A. (2011). [WA476212, Eupetomena macroura (Gmelin, 1788)]. Wiki Aves - A Enciclopédia das Aves do Brasil. Disponível em: <http://www.wikiaves.com/476212> Acesso em: 24 Ago 2019	http://www.wikiaves.com/476212
Eupetomena_macroura	Aloe vera	Legitimate	Not determined	Not determined	Alexandre Janas	2016-08-29	2016-08-29	São Manuel/SP	JANAS, A. (2016). [WA2255989, Eupetomena macroura (Gmelin, 1788)]. Wiki Aves - A Enciclopédia das Aves do Brasil. Disponível em: <http://www.wikiaves.com/2255989> Acesso em: 10 Ago 2019.	http://www.wikiaves.com/2255989
Eupetomena_macroura	Bauhinia variegata	Legitimate	Not determined	yes	Mayangdi Inzaulgarat	2019-07-04	2019-07-04	Brasília /DF	SUÁREZ, M. I. (2019). [WA3407743, Eupetomena macroura (Gmelin, 1788)]. Wiki Aves - A Enciclopédia das Aves do Brasil. Disponível em: <http://www.wikiaves.com/3407743> Acesso em: 11 Jul 2019	http://www.wikiaves.com/3407743
Eupetomena_macroura	Bougainvillea	Legitimate	Not determined	yes	João Fleury	2012-09-28	2012-11-06	São Paulo/SP	FLEURY, J. A. (2012). [WA795033, Eupetomena macroura (Gmelin, 1788)]. Wiki Aves - A Enciclopédia das Aves do Brasil. Disponível em: <http://www.wikiaves.com/795033> Acesso em: 21 Ago 2019.	http://www.wikiaves.com/795033
Eupetomena_macroura	Callistemon citrinus	Legitimate	Not determined	yes	Leonardo-1981	2017-04-01	2017-06-26	Rio das Flores/RJ	SESSA, L. B. (2017). [WA2602271, Eupetomena macroura (Gmelin, 1788)]. Wiki Aves - A Enciclopédia das Aves do Brasil. Disponível em: <http://www.wikiaves.com/2602271> Acesso em: 09 Ago 2019.	http://www.wikiaves.com/2602271
Eupetomena_macroura	Callistemon citrinus	Legitimate	Not determined	yes	Juan Carlo Mileib Ramires	2011-12-31	2012-01-03	Carmo do Cajuru/MG	RAMIRES, J. C. (2011). [WA537531, Eupetomena macroura (Gmelin, 1788)]. Wiki Aves - A Enciclopédia das Aves do Brasil. Disponível em: <http://www.wikiaves.com/537531> Acesso em: 24 Ago 2019.	http://www.wikiaves.com/537531
Eupetomena_macroura	Callistemon citrinus	Legitimate	Not determined	yes	Camila	2015-06-29	2015-06-29	Batatais/SP	CULTRI, C. N. (2015). [WA1742017, Eupetomena macroura (Gmelin, 1788)]. Wiki Aves - A Enciclopédia das Aves do Brasil. Disponível em: <http://www.wikiaves.com/1742017> Acesso em: 11 Ago 2019.	http://www.wikiaves.com/1742017
Eupetomena_macroura	Callistemon citrinus	Legitimate	Not determined	yes	Paulo M. Ribeiro	2013-08-08	2013-08-09	São Lourenço/MG	RIBEIRO, P. M. (2013). [WA1043652, Eupetomena macroura (Gmelin, 1788)]. Wiki Aves - A Enciclopédia das Aves do Brasil. Disponível em: <http://www.wikiaves.com/1043652> Acesso em: 19 Ago 2019.	http://www.wikiaves.com/1043652
Eupetomena_macroura	Erythrina speciosa Andrews	Legitimate	Not determined	yes	Rafael Cortez	2013-06-28	2013-06-29	Ourinhos/SP	CORTEZ, R. B. (2013). [WA999453, Eupetomena macroura (Gmelin, 1788)]. Wiki Aves - A Enciclopédia das Aves do Brasil. Disponível em: <http://www.wikiaves.com/999453> Acesso em: 19 Ago 2019	http://www.wikiaves.com/999453
Eupetomena_macroura	Callistemon citrinus	Legitimate	Not determined	yes	José Cristovão Leal Corrêa	2013-03-13	2013-03-27	Mirandópolis/SP	CORRÊA, J. C. (2013). [WA919552, Eupetomena macroura (Gmelin, 1788)]. Wiki Aves - A Enciclopédia das Aves do Brasil. Disponível em: <http://www.wikiaves.com/919552> Acesso em: 21 Ago 2019	http://www.wikiaves.com/919552
Eupetomena_macroura	Callistemon citrinus	Legitimate	Not determined	yes	Lindolfo Souto	2012-10-03	2012-10-08	São Vicente/SP	SOUTO, L. V. (2012). [WA764199, Eupetomena macroura (Gmelin, 1788)]. Wiki Aves - A Enciclopédia das Aves do Brasil. Disponível em: <http://www.wikiaves.com/764199> Acesso em: 21 Ago 2019	http://www.wikiaves.com/764199
Eupetomena_macroura	Callistemon citrinus	Legitimate	Not determined	Not determined	Francisco Pizarro	2012-09-03	2012-09-15	Belo Horizonte/MG	PIZARRO, F. J. (2012). [WA744995, Eupetomena macroura (Gmelin, 1788)]. Wiki Aves - A Enciclopédia das Aves do Brasil. Disponível em: <http://www.wikiaves.com/744995> Acesso em: 21 Ago 2019.	http://www.wikiaves.com/744995
Eupetomena_macroura	Callistemon citrinus	Legitimate	Not determined	yes	Adhemar Duro	2010-12-13	2010-12-28	Guarulhos/SP	JÚNIOR, A. M. (2010). [WA267585, Eupetomena macroura (Gmelin, 1788)]. Wiki Aves - A Enciclopédia das Aves do Brasil. Disponível em: <http://www.wikiaves.com/267585> Acesso em: 31 Ago 2019	http://www.wikiaves.com/267585
Eupetomena_macroura	Callistemon citrinus	Legitimate	Not determined	Not determined	Roberto Gallacci	2010-02-17	2010-02-17	Jundiaí/SP	GALLACCI, R. (2010). [WA110585, Eupetomena macroura (Gmelin, 1788)]. Wiki Aves - A Enciclopédia das Aves do Brasil. Disponível em: <http://www.wikiaves.com/110585> Acesso em: 03 Set 2019.	http://www.wikiaves.com/110585
Eupetomena_macroura	Cactaceae	Legitimate	Not determined	yes	Hugo Willlian Cacho	2015-10-20	2015-10-27	São Bento do Norte/RN	WILLIAN, H. C. (2015). [WA1888646, Eupetomena macroura (Gmelin, 1788)]. Wiki Aves - A Enciclopédia das Aves do Brasil. Disponível em: <http://www.wikiaves.com/1888646> Acesso em: 10 Ago 2019.	http://www.wikiaves.com/1888646
Eupetomena_macroura	Ceiba speciosa	Legitimate	Not determined	yes	Matheus Henrique	2019-03-24	2019-03-24	São Sebastião do Paraíso/MG	REIS, M. H. (2019). [WA3312781, Eupetomena macroura (Gmelin, 1788)]. Wiki Aves - A Enciclopédia das Aves do Brasil. Disponível em: <http://www.wikiaves.com/3312781> Acesso em: 05 Ago 2019.	http://www.wikiaves.com/3312781
Eupetomena_macroura	Ceiba speciosa	Legitimate	Not determined	Not determined	Carol Chiodi	2014-03-02	2014-03-06	Bueno Brandão/MG	SILVA, A. C. (2014). [WA1265081, Eupetomena macroura (Gmelin, 1788)]. Wiki Aves - A Enciclopédia das Aves do Brasil. Disponível em: <http://www.wikiaves.com/1265081> Acesso em: 13 Ago 2019.	http://www.wikiaves.com/1265081
Eupetomena_macroura	Clerodendrum x speciosum	Legitimate	Not determined	yes	Plauto Lopes	2016-12-09	2016-12-10	Florianópolis/SC	LOPES, P. R. (2016). [WA2395718, Eupetomena macroura (Gmelin, 1788)]. Wiki Aves - A Enciclopédia das Aves do Brasil. Disponível em: <http://www.wikiaves.com/2395718> Acesso em: 10 Ago 2019.	http://www.wikiaves.com/2395718
Eupetomena_macroura	Clerodendrum speciosissimum	Legitimate	Not determined	yes	Cleiton Duarte	2013-02-09	2013-06-15	Grossos/RN	DUARTE, C. F. (2013). [WA988292, Eupetomena macroura (Gmelin, 1788)]. Wiki Aves - A Enciclopédia das Aves do Brasil. Disponível em: <http://www.wikiaves.com/988292> Acesso em: 19 Ago 2019.	http://www.wikiaves.com/988292
Eupetomena_macroura	Clerodendrum x speciosum	Legitimate	Not determined	yes	Eduardo G. Silva	2012-08-28	2012-09-02	Belo Horizonte/MG	SILVA, E. C. (2012). [WA732745, Eupetomena macroura (Gmelin, 1788)]. Wiki Aves - A Enciclopédia das Aves do Brasil. Disponível em: <http://www.wikiaves.com/732745> Acesso em: 21 Ago 2019.	http://www.wikiaves.com/732745
Eupetomena_macroura	Costus spiralis	Legitimate	Not determined	yes	Tiago Costa	2011-02-05	2011-06-11	Votuporanga/SP	COSTA, T. C. (2011). [WA368423, Eupetomena macroura (Gmelin, 1788)]. Wiki Aves - A Enciclopédia das Aves do Brasil. Disponível em: <http://www.wikiaves.com/368423> Acesso em: 29 Ago 2019.	http://www.wikiaves.com/368423
Eupetomena_macroura	Eriotheca pubescens	Legitimate	Not determined	Not determined	Amaro Alves	2010-06-19	2010-06-19	Brasília/DF	ALVES, A. L. (2010). [WA156497, Eupetomena macroura (Gmelin, 1788)]. Wiki Aves - A Enciclopédia das Aves do Brasil. Disponível em: <http://www.wikiaves.com/156497> Acesso em: 04 Set 2019.	http://www.wikiaves.com/156497
Eupetomena_macroura	Erythrina speciosa	Legitimate	Not determined	yes	Thomaz Tozzi B. Raso	2018-07-25	2018-07-26	Lindóia/SP	RASO, T. T. (2018). [WA3048331, Eupetomena macroura (Gmelin, 1788)]. Wiki Aves - A Enciclopédia das Aves do Brasil. Disponível em: <http://www.wikiaves.com/3048331> Acesso em: 06 Ago 2019.	http://www.wikiaves.com/3048331
Eupetomena_macroura	Erythrina speciosa	Legitimate	Not determined	yes	Ferrão	2011-07-27	2017-05-20	São Paulo/SP	VIDEIRA, F. F. (2011). [WA2562315, Eupetomena macroura (Gmelin, 1788)]. Wiki Aves - A Enciclopédia das Aves do Brasil. Disponível em: <http://www.wikiaves.com/2562315> Acesso em: 10 Ago 2019.	http://www.wikiaves.com/2562315
Eupetomena_macroura	Erythrina speciosa	Legitimate	Not determined	Not determined	Celina Witech Fauth	2014-06-30	2014-07-07	Santos/SP	FAUTH, C. W. (2014). [WA1378031, Eupetomena macroura (Gmelin, 1788)]. Wiki Aves - A Enciclopédia das Aves do Brasil. Disponível em: <http://www.wikiaves.com/1378031> Acesso em: 13 Ago 2019.	http://www.wikiaves.com/1378031
Eupetomena_macroura	Erythrina speciosa	Legitimate	Not determined	Not determined	Alessandra Souza	2014-06-29	2014-07-01	São Paulo/SP	SOUZA, A. (2014). [WA1372393, Eupetomena macroura (Gmelin, 1788)]. Wiki Aves - A Enciclopédia das Aves do Brasil. Disponível em: <http://www.wikiaves.com/1372393> Acesso em: 13 Ago 2019.	http://www.wikiaves.com/1372393
Eupetomena_macroura	Erythrina speciosa	Legitimate	Not determined	yes	Marcos Maranhão	2012-08-17	2012-08-23	Curitiba/PR	MARANHÃO, M. P. (2012). [WA723431, Eupetomena macroura (Gmelin, 1788)]. Wiki Aves - A Enciclopédia das Aves do Brasil. Disponível em: <http://www.wikiaves.com/723431> Acesso em: 22 Ago 2019	http://www.wikiaves.com/723431
Eupetomena_macroura	Erythrina speciosa	Legitimate	Not determined	yes	Ulisses Nemetz	2012-08-08	2012-08-10	São Paulo/SP	NEMETZ, U. (2012). [WA712527, Eupetomena macroura (Gmelin, 1788)]. Wiki Aves - A Enciclopédia das Aves do Brasil. Disponível em: <http://www.wikiaves.com/712527> Acesso em: 22 Ago 2019.	http://www.wikiaves.com/712527
Eupetomena_macroura	Erythrina speciosa	Legitimate	Not determined	yes	Elidio Gomes	2012-07-27	2012-07-27	São Paulo/SP	GOMES, E. (2012). [WA700212, Eupetomena macroura (Gmelin, 1788)]. Wiki Aves - A Enciclopédia das Aves do Brasil. Disponível em: <http://www.wikiaves.com/700212> Acesso em: 22 Ago 2019.	http://www.wikiaves.com/700212
Eupetomena_macroura	Erythrina speciosa	Legitimate	Not determined	yes	José Bauer	2012-07-19	2012-07-21	Salto/SP	BAUER, J. A. (2012). [WA694056, Eupetomena macroura (Gmelin, 1788)]. Wiki Aves - A Enciclopédia das Aves do Brasil. Disponível em: <http://www.wikiaves.com/694056> Acesso em: 22 Ago 2019.	http://www.wikiaves.com/694056
Eupetomena_macroura	Erythrina speciosa	Legitimate	Not determined	yes	Rodolfo Jambeiro	2012-07-10	2012-07-17	Arujá/SP	JAMBEIRO, R. (2012). [WA690976, Eupetomena macroura (Gmelin, 1788)]. Wiki Aves - A Enciclopédia das Aves do Brasil. Disponível em: <http://www.wikiaves.com/690976> Acesso em: 22 Ago 2019.	http://www.wikiaves.com/690976
Eupetomena_macroura	Erythrina speciosa	Legitimate	Not determined	yes	Flávio Sousa	2012-06-24	2012-07-03	Santos/SP	SOUSA, F. T. (2012). [WA678904, Eupetomena macroura (Gmelin, 1788)]. Wiki Aves - A Enciclopédia das Aves do Brasil. Disponível em: <http://www.wikiaves.com/678904> Acesso em: 22 Ago 2019.	http://www.wikiaves.com/678904
Eupetomena_macroura	Erythrina speciosa	Legitimate	Not determined	yes	Valerio Winter	2011-07-03	2011-07-03	Petrópolis/RJ	WINTER, V. (2011). [WA385388, Eupetomena macroura (Gmelin, 1788)]. Wiki Aves - A Enciclopédia das Aves do Brasil. Disponível em: <http://www.wikiaves.com/385388> Acesso em: 29 Ago 2019.	http://www.wikiaves.com/385388
Eupetomena_macroura	Erythrina speciosa	Legitimate	Not determined	yes	Marcelo Dutra	2008-08-31	2010-11-07	Ilhabela/SP	SILVA, M. D. (2008). [WA235848, Eupetomena macroura (Gmelin, 1788)]. Wiki Aves - A Enciclopédia das Aves do Brasil. Disponível em: <http://www.wikiaves.com/235848> Acesso em: 31 Ago 2019.	http://www.wikiaves.com/235848
Eupetomena_macroura	Erythrina speciosa	Legitimate	Not determined	yes	Ivan Costa	2010-09-05	2010-09-15	Socorro/SP	COSTA, I. (2010). [WA202645, Eupetomena macroura (Gmelin, 1788)]. Wiki Aves - A Enciclopédia das Aves do Brasil. Disponível em: <http://www.wikiaves.com/202645> Acesso em: 31 Ago 2019.	http://www.wikiaves.com/202645
Eupetomena_macroura	Erythrina speciosa	Legitimate	Not determined	yes	Myrian Tatibana	2010-07-05	2010-08-30	São Paulo/SP	TATIBANA, M. (2010). [WA192275, Eupetomena macroura (Gmelin, 1788)]. Wiki Aves - A Enciclopédia das Aves do Brasil. Disponível em: <http://www.wikiaves.com/192275> Acesso em: 04 Set 2019.	http://www.wikiaves.com/192275
Eupetomena_macroura	Erythrina speciosa	Legitimate	Not determined	yes	Fabio Leoni	2010-06-10	2010-06-10	Barueri/SP	LEONI, F. J. (2010). [WA152531, Eupetomena macroura (Gmelin, 1788)]. Wiki Aves - A Enciclopédia das Aves do Brasil. Disponível em: <http://www.wikiaves.com/152531> Acesso em: 04 Set 2019	http://www.wikiaves.com/152531
Eupetomena_macroura	Erythrina speciosa	Legitimate	Not determined	yes	Paulo Guerra	2009-08-09	2009-08-09	Jaú/SP	GUERRA, P. E. (2009). [WA43836, Eupetomena macroura (Gmelin, 1788)]. Wiki Aves - A Enciclopédia das Aves do Brasil. Disponível em: <http://www.wikiaves.com/43836> Acesso em: 04 Set 2019.	http://www.wikiaves.com/43836
Eupetomena_macroura	Erythrina speciosa	Legitimate	Not determined	yes	Luiz Ribenboim	2009-07-07	2009-07-13	Resende/RJ	RIBENBOIM, L. C. (2009). [WA35091, Eupetomena macroura (Gmelin, 1788)]. Wiki Aves - A Enciclopédia das Aves do Brasil. Disponível em: <http://www.wikiaves.com/35091> Acesso em: 04 Set 2019.	http://www.wikiaves.com/35091
Eupetomena_macroura	Etlingera elatior	Legitimate	Not determined	yes	Luis Nadal	2018-03-31	2018-04-08	Ubatuba/SP	NADAL, L. C. (2018). [WA2934158, Eupetomena macroura (Gmelin, 1788)]. Wiki Aves - A Enciclopédia das Aves do Brasil. Disponível em: <http://www.wikiaves.com/2934158> Acesso em: 06 Ago 2019.	http://www.wikiaves.com/2934158
Eupetomena_macroura	Euphorbia tithymaloides	Legitimate	Not determined	yes	Renato Palma Rocha	2013-09-20	2013-09-21	Santa Rosa de Viterbo/SP	ROCHA, R. P. (2013). [WA1093040, Eupetomena macroura (Gmelin, 1788)]. Wiki Aves - A Enciclopédia das Aves do Brasil. Disponível em: <http://www.wikiaves.com/1093040> Acesso em: 19 Ago 2019.	http://www.wikiaves.com/1093040
Eupetomena_macroura	Gladiolus	Legitimate	Not determined	yes	Lincoln Tavares	2014-12-01	2015-02-03	Inconfidentes/MG	SANTOS, L. G. (2014). [WA1600339, Eupetomena macroura (Gmelin, 1788)]. Wiki Aves - A Enciclopédia das Aves do Brasil. Disponível em: <http://www.wikiaves.com/1600339> Acesso em: 11 Ago 2019.	http://www.wikiaves.com/1600339
Eupetomena_macroura	Grevillea banksii	Legitimate	Not determined	yes	Miguel B. Lima	2017-09-11	2017-09-28	Londrina/PR	LIMA, M. B. (2017). [WA2715918, Eupetomena macroura (Gmelin, 1788)]. Wiki Aves - A Enciclopédia das Aves do Brasil. Disponível em: <http://www.wikiaves.com/2715918> Acesso em: 09 Ago 2019.	http://www.wikiaves.com/2715918
Eupetomena_macroura	Grevillea banksii	Legitimate	Not determined	yes	Alessandro R. Santos	2015-08-09	2015-08-12	Sorocaba/SP	SANTOS, A. R. (2015). [WA1794551, Eupetomena macroura (Gmelin, 1788)]. Wiki Aves - A Enciclopédia das Aves do Brasil. Disponível em: <http://www.wikiaves.com/1794551> Acesso em: 10 Ago 2019.	http://www.wikiaves.com/1794551
Eupetomena_macroura	Grevillea banksii	Legitimate	Not determined	yes	Henrique Garbino	2014-12-16	2014-12-18	Guaratinguetá/SP	GARBINO, H. S. (2014). [WA1550761, Eupetomena macroura (Gmelin, 1788)]. Wiki Aves - A Enciclopédia das Aves do Brasil. Disponível em: <http://www.wikiaves.com/1550761> Acesso em: 11 Ago 2019.	http://www.wikiaves.com/1550761
Eupetomena_macroura	Grevillea banksii	Legitimate	Not determined	yes	Denis Valerio	2014-07-26	2014-08-24	Ladainha/MG	VALERIO, D. A. (2014). [WA1427606, Eupetomena macroura (Gmelin, 1788)]. Wiki Aves - A Enciclopédia das Aves do Brasil. Disponível em: <http://www.wikiaves.com/1427606> Acesso em: 11 Ago 2019.	http://www.wikiaves.com/1427606
Eupetomena_macroura	Grevillea banksii	Legitimate	Not determined	yes	ricardosouza	2013-11-06	2013-11-07	São Paulo/SP	SOUZA, J. R. (2013). [WA1146041, Eupetomena macroura (Gmelin, 1788)]. Wiki Aves - A Enciclopédia das Aves do Brasil. Disponível em: <http://www.wikiaves.com/1146041> Acesso em: 13 Ago 2019	http://www.wikiaves.com/1146041
Eupetomena_macroura	Grevillea banksii	Legitimate	Not determined	yes	Luis Fabiano Ortiz	2013-07-27	2013-08-20	Americana/SP	ORTIZ, L. F. (2013). [WA1054574, Eupetomena macroura (Gmelin, 1788)]. Wiki Aves - A Enciclopédia das Aves do Brasil. Disponível em: <http://www.wikiaves.com/1054574> Acesso em: 19 Ago 2019.	http://www.wikiaves.com/1054574
Eupetomena_macroura	Grevillea banksii	Legitimate	Not determined	yes	Michel Santos	2012-10-25	2012-10-27	Florianópolis/SC	SANTOS, M. S. (2012). [WA785811, Eupetomena macroura (Gmelin, 1788)]. Wiki Aves - A Enciclopédia das Aves do Brasil. Disponível em: <http://www.wikiaves.com/785811> Acesso em: 21 Ago 2019.	http://www.wikiaves.com/785811
Eupetomena_macroura	Grevillea banksii	Legitimate	Not determined	yes	Marco Iazbeck	2012-07-10	2012-07-10	São José dos Campos/SP	IAZBECK, M. A. (2012). [WA684542, Eupetomena macroura (Gmelin, 1788)]. Wiki Aves - A Enciclopédia das Aves do Brasil. Disponível em: <http://www.wikiaves.com/684542> Acesso em: 22 Ago 2019.	http://www.wikiaves.com/684542
Eupetomena_macroura	Grevillea banksii	Legitimate	Not determined	yes	Roney Silveira	2011-10-11	2011-10-11	Nova Friburgo/RJ	SILVEIRA, R. J. (2011). [WA466119, Eupetomena macroura (Gmelin, 1788)]. Wiki Aves - A Enciclopédia das Aves do Brasil. Disponível em: <http://www.wikiaves.com/466119> Acesso em: 24 Ago 2019.	http://www.wikiaves.com/466119
Eupetomena_macroura	Grevillea banksii	Legitimate	Not determined	yes	Leonardo Milano	2007-02-04	2011-05-28	Pirassununga/SP	MILANO, L. (2007). [WA359571, Eupetomena macroura (Gmelin, 1788)]. Wiki Aves - A Enciclopédia das Aves do Brasil. Disponível em: <http://www.wikiaves.com/359571> Acesso em: 29 Ago 2019	http://www.wikiaves.com/359571
Eupetomena_macroura	Grevillea banksii	Legitimate	Not determined	yes	Luiz Ribenboim	2007-09-23	2009-04-09	Resende/RJ	RIBENBOIM, L. C. (2007). [WA15891, Eupetomena macroura (Gmelin, 1788)]. Wiki Aves - A Enciclopédia das Aves do Brasil. Disponível em: <http://www.wikiaves.com/15891> Acesso em: 04 Set 2019.	http://www.wikiaves.com/15891
Eupetomena_macroura	Handroanthus	Legitimate	Not determined	yes	Valmiro Felippe	2013-08-26	2013-08-26	Cascavel/PR	FELIPPE, V. (2013). [WA1062488, Eupetomena macroura (Gmelin, 1788)]. Wiki Aves - A Enciclopédia das Aves do Brasil. Disponível em: <http://www.wikiaves.com/1062488> Acesso em: 19 Ago 2019.	http://www.wikiaves.com/1062488
Eupetomena_macroura	Heliconia bihai	Legitimate	Not determined	yes	Sergio I. Kawata	2010-09-07	2010-09-08	Rio de Janeiro/RJ	KAWATA, S. I. (2010). [WA197317, Eupetomena macroura (Gmelin, 1788)]. Wiki Aves - A Enciclopédia das Aves do Brasil. Disponível em: <http://www.wikiaves.com/197317> Acesso em: 31 Ago 2019.	http://www.wikiaves.com/197317
Eupetomena_macroura	Heliconia rostrata	Legitimate	Not determined	Not determined	Marta Silva	2011-12-10	2011-12-31	Santa Rita do Passa Quatro/SP	SILVA, M. D. (2011). [WA534471, Eupetomena macroura (Gmelin, 1788)]. Wiki Aves - A Enciclopédia das Aves do Brasil. Disponível em: <http://www.wikiaves.com/534471> Acesso em: 24 Ago 2019.	http://www.wikiaves.com/534471
Eupetomena_macroura	Heliconia rostrata	Legitimate	Not determined	Not determined	Dario Sanches	2008-12-03	2009-01-20	Piraju/SP	SANCHES, D. (2008). [WA3188, Eupetomena macroura (Gmelin, 1788)]. Wiki Aves - A Enciclopédia das Aves do Brasil. Disponível em: <http://www.wikiaves.com/3188> Acesso em: 04 Set 2019.	http://www.wikiaves.com/3188
Eupetomena_macroura	Inga	Legitimate	Not determined	yes	Wellington Tiago	2013-10-05	2013-10-14	Maringá/PR	PEREIRA, W. T. (2013). [WA1118720, Eupetomena macroura (Gmelin, 1788)]. Wiki Aves - A Enciclopédia das Aves do Brasil. Disponível em: <http://www.wikiaves.com/1118720> Acesso em: 19 Ago 2019.	http://www.wikiaves.com/1118720
Eupetomena_macroura	Ixora chinensis Lam.	Legitimate	Not determined	Not determined	Constança Queiroz	2010-08-31	2017-03-07	Salvador/BA	SOUZA, M. C. (2010). [WA2489884, Eupetomena macroura (Gmelin, 1788)]. Wiki Aves - A Enciclopédia das Aves do Brasil. Disponível em: <http://www.wikiaves.com/2489884> Acesso em: 10 Ago 2019	http://www.wikiaves.com/2489884
Eupetomena_macroura	Clerodendrum	Legitimate	Not determined	yes	Weber Marra	2013-10-11	2013-10-23	São Miguel do Passa Quatro/GO	MARRA, W. V. (2013). [WA1130126, Eupetomena macroura (Gmelin, 1788)]. Wiki Aves - A Enciclopédia das Aves do Brasil. Disponível em: <http://www.wikiaves.com/1130126> Acesso em: 19 Ago 2019.	http://www.wikiaves.com/1130126
Eupetomena_macroura	Ixora coccinea	Legitimate	Not determined	yes	Gilvan Moreira	2013-04-10	2013-04-11	Salvador/BA	SANTOS, G. M. (2013). [WA932093, Eupetomena macroura (Gmelin, 1788)]. Wiki Aves - A Enciclopédia das Aves do Brasil. Disponível em: <http://www.wikiaves.com/932093> Acesso em: 20 Ago 2019	http://www.wikiaves.com/932093
Eupetomena_macroura	Ixora coccinea	Legitimate	Not determined	yes	João Couto	2009-08-22	2009-09-14	Rio de Janeiro/RJ	COUTO, J. Q. (2009). [WA54611, Eupetomena macroura (Gmelin, 1788)]. Wiki Aves - A Enciclopédia das Aves do Brasil. Disponível em: <http://www.wikiaves.com/54611> Acesso em: 04 Set 2019.	http://www.wikiaves.com/54611
Eupetomena_macroura	Justicia aurea	Legitimate	Not determined	yes	Sinésio Dioliveira	2012-12-26	2013-01-03	Brumadinho/MG	DIOLIVEIRA, S. (2012). [WA845109, Eupetomena macroura (Gmelin, 1788)]. Wiki Aves - A Enciclopédia das Aves do Brasil. Disponível em: <http://www.wikiaves.com/845109> Acesso em: 21 Ago 2019.	http://www.wikiaves.com/845109
Eupetomena_macroura	Lantana camara	Legitimate	Not determined	yes	João Mattos	2013-12-06	2013-12-08	Joanópolis/SP	MATTOS, J. A. (2013). [WA1178150, Eupetomena macroura (Gmelin, 1788)]. Wiki Aves - A Enciclopédia das Aves do Brasil. Disponível em: <http://www.wikiaves.com/1178150> Acesso em: 13 Ago 2019.	http://www.wikiaves.com/1178150
Eupetomena_macroura	Leonotis nepetifolia	Legitimate	Not determined	yes	Herbert O. R. Schubart	2013-09-01	2013-09-14	Brasília/DF	SCHUBART, H. O. (2013). [WA1084917, Eupetomena macroura (Gmelin, 1788)]. Wiki Aves - A Enciclopédia das Aves do Brasil. Disponível em: <http://www.wikiaves.com/1084917> Acesso em: 19 Ago 2019.	http://www.wikiaves.com/1084917
Eupetomena_macroura	Leonotis nepetifolia	Legitimate	Not determined	yes	Zé Edu Camargo	2011-01-20	2011-01-21	Nepomuceno/MG	CAMARGO, J. E. (2011). [WA282739, Eupetomena macroura (Gmelin, 1788)]. Wiki Aves - A Enciclopédia das Aves do Brasil. Disponível em: <http://www.wikiaves.com/282739> Acesso em: 31 Ago 2019	http://www.wikiaves.com/282739
Eupetomena_macroura	Megaskepasma erythrochlamys	Legitimate	Not determined	yes	William Maciel	2014-09-13	2014-09-14	Queluzito/MG	MACIEL, W. R. (2014). [WA1451322, Eupetomena macroura (Gmelin, 1788)]. Wiki Aves - A Enciclopédia das Aves do Brasil. Disponível em: <http://www.wikiaves.com/1451322> Acesso em: 11 Ago 2019	http://www.wikiaves.com/1451322
Eupetomena_macroura	Musa	Legitimate	Not determined	yes	Lawrence Rabelo De Almeida	2016-04-21	2016-04-22	Lagoa Formosa/MG	ALMEIDA, L. R. (2016). [WA2093377, Eupetomena macroura (Gmelin, 1788)]. Wiki Aves - A Enciclopédia das Aves do Brasil. Disponível em: <http://www.wikiaves.com/2093377> Acesso em: 10 Ago 2019.	http://www.wikiaves.com/2093377
Eupetomena_macroura	Musa	Legitimate	Not determined	yes	Ivan Marques Campos	2014-08-03	2014-08-03	Ibiúna/SP	CAMPOS, I. M. (2014). [WA1405543, Eupetomena macroura (Gmelin, 1788)]. Wiki Aves - A Enciclopédia das Aves do Brasil. Disponível em: <http://www.wikiaves.com/1405543> Acesso em: 11 Ago 2019.	http://www.wikiaves.com/1405543
Eupetomena_macroura	Musa	Legitimate	Not determined	yes	Douglas Bete	2011-12-14	2011-12-14	Sorocaba/SP	BETE, D. (2011). [WA522372, Eupetomena macroura (Gmelin, 1788)]. Wiki Aves - A Enciclopédia das Aves do Brasil. Disponível em: <http://www.wikiaves.com/522372> Acesso em: 24 Ago 2019.	http://www.wikiaves.com/522372
Eupetomena_macroura	Odontomena	Legitimate	Not determined	Not determined	Daniel Garcia	2010-01-17	2010-01-18	Brotas/SP	GARCIA, D. R. (2010). [WA100950, Eupetomena macroura (Gmelin, 1788)]. Wiki Aves - A Enciclopédia das Aves do Brasil. Disponível em: <http://www.wikiaves.com/100950> Acesso em: 03 Set 2019.	http://www.wikiaves.com/100950
Eupetomena_macroura	Odontonema	Legitimate	Not determined	yes	Arnaldo De Araujo B.s.	2010-01-24	2010-02-04	Guaramiranga/CE	SEGUNDO, A. A. (2010). [WA106347, Eupetomena macroura (Gmelin, 1788)]. Wiki Aves - A Enciclopédia das Aves do Brasil. Disponível em: <http://www.wikiaves.com/106347> Acesso em: 04 Set 2019.	http://www.wikiaves.com/106347
Eupetomena_macroura	Opuntia	Legitimate	Not determined	yes	Rogério de Castro	2019-02-24	2019-02-27	Brasília/DF	CASTRO, R. (2019). [WA3288604, Eupetomena macroura (Gmelin, 1788)]. Wiki Aves - A Enciclopédia das Aves do Brasil. Disponível em: <http://www.wikiaves.com/3288604> Acesso em: 06 Ago 2019.	http://www.wikiaves.com/3288604
Eupetomena_macroura	Salvia	Legitimate	Not determined	yes	Rogério de Castro	2019-05-01	2019-05-19	Brasília/DF	CASTRO, R. (2019). [WA3346119, Eupetomena macroura (Gmelin, 1788)]. Wiki Aves - A Enciclopédia das Aves do Brasil. Disponível em: <http://www.wikiaves.com/3346119> Acesso em: 05 Ago 2019.	http://www.wikiaves.com/3346119
Eupetomena_macroura	Prunus	Legitimate	Not determined	yes	Guilherme Battistuzzo	2011-07-09	2013-05-27	Nova Friburgo/RJ	BATTISTUZZO, G. S. (2011). [WA971525, Eupetomena macroura (Gmelin, 1788)]. Wiki Aves - A Enciclopédia das Aves do Brasil. Disponível em: <http://www.wikiaves.com/971525> Acesso em: 19 Ago 2019.	http://www.wikiaves.com/971525
Eupetomena_macroura	Prunus	Legitimate	Not determined	Not determined	Roberto Cirino	2010-07-01	2010-07-02	Curitiba/PR	CIRINO, R. P. (2010). [WA160960, Eupetomena macroura (Gmelin, 1788)]. Wiki Aves - A Enciclopédia das Aves do Brasil. Disponível em: <http://www.wikiaves.com/160960> Acesso em: 04 Set 2019.	http://www.wikiaves.com/160960
Eupetomena_macroura	Pseudogynoxys chenopodioides	Legitimate	Not determined	yes	Lawrence Rabelo De Almeida	2015-12-17	2015-12-17	Lagoa Formosa/MG	ALMEIDA, L. R. (2015). [WA1949720, Eupetomena macroura (Gmelin, 1788)]. Wiki Aves - A Enciclopédia das Aves do Brasil. Disponível em: <http://www.wikiaves.com/1949720> Acesso em: 10 Ago 2019.	http://www.wikiaves.com/1949720
Eupetomena_macroura	Punica granatum	Legitimate	Not determined	yes	Matheus Henrique	2019-03-09	2019-03-09	São Sebastião do Paraíso/MG	REIS, M. H. (2019). [WA3299710, Eupetomena macroura (Gmelin, 1788)]. Wiki Aves - A Enciclopédia das Aves do Brasil. Disponível em: <http://www.wikiaves.com/3299710> Acesso em: 06 Ago 2019.	http://www.wikiaves.com/3299710
Eupetomena_macroura	Pyrostegia venusta	Legitimate	Not determined	yes	Luan Eduardo O. Silva	2014-07-22	2014-07-22	Tarabai/SP	SILVA, L. E. (2014). [WA1393288, Eupetomena macroura (Gmelin, 1788)]. Wiki Aves - A Enciclopédia das Aves do Brasil. Disponível em: <http://www.wikiaves.com/1393288> Acesso em: 11 Ago 2019.	http://www.wikiaves.com/1393288
Eupetomena_macroura	Pyrostegia venusta	Legitimate	Not determined	yes	Warley Silva	2012-07-16	2012-07-22	Sabará/MG	SILVA, W. R. (2012). [WA695809, Eupetomena macroura (Gmelin, 1788)]. Wiki Aves - A Enciclopédia das Aves do Brasil. Disponível em: <http://www.wikiaves.com/695809> Acesso em: 22 Ago 2019.	http://www.wikiaves.com/695809
Eupetomena_macroura	Pyrostegia venusta	Legitimate	Not determined	yes	Carlos S. Rodrigues	2010-07-01	2015-07-09	Goiânia/GO	RODRIGUES, C. S. (2010). [WA1751733, Eupetomena macroura (Gmelin, 1788)]. Wiki Aves - A Enciclopédia das Aves do Brasil. Disponível em: <http://www.wikiaves.com/1751733> Acesso em: 10 Ago 2019	http://www.wikiaves.com/1751733
Eupetomena_macroura	Russelia equisetiformis	Legitimate	Not determined	yes	Edna Machado	2017-02-27	2017-02-27	Colatina/ES	MACHADO, E. (2017). [WA2479007, Eupetomena macroura (Gmelin, 1788)]. Wiki Aves - A Enciclopédia das Aves do Brasil. Disponível em: <http://www.wikiaves.com/2479007> Acesso em: 10 Ago 2019.	http://www.wikiaves.com/2479007
Eupetomena_macroura	Russelia equisetiformis	Legitimate	Not determined	yes	Paulo Rezende	2014-03-01	2014-03-01	Rio de Janeiro/RJ	REZENDE, P. V. (2014). [WA1259680, Eupetomena macroura (Gmelin, 1788)]. Wiki Aves - A Enciclopédia das Aves do Brasil. Disponível em: <http://www.wikiaves.com/1259680> Acesso em: 13 Ago 2019.	http://www.wikiaves.com/1259680
Eupetomena_macroura	Russelia equisetiformis	Legitimate	Not determined	yes	Giovani B. Parrilha	2012-12-06	2013-01-05	Araçatuba/SP	PARRILHA, G. B. (2012). [WA846949, Eupetomena macroura (Gmelin, 1788)]. Wiki Aves - A Enciclopédia das Aves do Brasil. Disponível em: <http://www.wikiaves.com/846949> Acesso em: 21 Ago 2019.	http://www.wikiaves.com/846949
Eupetomena_macroura	Russelia equisetiformis	Legitimate	Not determined	Not determined	Cláudio Greco	2009-08-16	2009-08-22	Belo Horizonte/MG	GRECO, C. (2009). [WA48116, Eupetomena macroura (Gmelin, 1788)]. Wiki Aves - A Enciclopédia das Aves do Brasil. Disponível em: <http://www.wikiaves.com/48116> Acesso em: 04 Set 2019	http://www.wikiaves.com/48116
Eupetomena_macroura	Salvia	Legitimate	Not determined	yes	Norica Iglesias	2018-03-06	2018-10-16	São Bento do Sapucaí/SP	IGLESIAS, N. H. (2018). [WA3148123, Eupetomena macroura (Gmelin, 1788)]. Wiki Aves - A Enciclopédia das Aves do Brasil. Disponível em:<http://www.wikiaves.com/3148123> Acesso em: 06 Ago 2019.	http://www.wikiaves.com/3148123
Eupetomena_macroura	Strelitzia reginae	Legitimate	Not determined	yes	Ivan Rocha	2013-04-13	2013-04-29	Mafra/SC	ROCHA, I. (2013). [WA947142, Eupetomena macroura (Gmelin, 1788)]. Wiki Aves - A Enciclopédia das Aves do Brasil. Disponível em: <http://www.wikiaves.com/947142> Acesso em: 19 Ago 2019.	http://www.wikiaves.com/947142
Eupetomena_macroura	Thunbergia mysorensis	Legitimate	Male	yes	João Couto	2009-08-08	2009-08-09	Rio de Janeiro/RJ	COUTO, J. Q. (2009). [WA43746, Eupetomena macroura (Gmelin, 1788)]. Wiki Aves - A Enciclopédia das Aves do Brasil. Disponível em: <http://www.wikiaves.com/43746> Acesso em: 04 Set 2019.	http://www.wikiaves.com/43746
Eupetomena_macroura	Campsis	Legitimate	Indeterminado	yes	PCanapini	2020-11-20	2020-11-20	Treviso/SC	CANAPINI, P. (2020). [WA4082903, Eupetomena macroura (Gmelin, 1788)]. Wiki Aves - A Enciclopédia das Aves do Brasil. Disponível em:	http://www.wikiaves.com/4082903
Eupetomena_macroura	Russelia sp	Legitimate	Indeterminado	yes	Ricardo Danilo A. Filho	2020-11-12	2020-11-20	Itaperuna/RJ	FILHO, R. D. (2020). [WA4082523, Eupetomena macroura (Gmelin, 1788)]. Wiki Aves - A Enciclopédia das Aves do Brasil. Disponível em:	http://www.wikiaves.com/4082523
Eupetomena_macroura	Lantana camara	Legitimate	Indeterminado	yes	Max Homma	2020-11-14	2020-11-14	Buri/SP	HOMMA, M. H. (2020). [WA4073387, Eupetomena macroura (Gmelin, 1788)]. Wiki Aves - A Enciclopédia das Aves do Brasil. Disponível em:	http://www.wikiaves.com/4073387
Eupetomena_macroura	Palicourea rigida	Legitimate	Indeterminado	yes	Maurício Poletti	2020-11-11	2020-11-14	Catalão/GO	POLETTI, M. M. (2020). [WA4073228, Eupetomena macroura (Gmelin, 1788)]. Wiki Aves - A Enciclopédia das Aves do Brasil. Disponível em:	http://www.wikiaves.com/4073228
Eupetomena_macroura	Streptosolen jamesonii	Legitimate	Indeterminado	yes	Paulo Roberto Milanez	2020-11-11	2020-11-12	Vinhedo/SP	MILANEZ, P. R. (2020). [WA4071877, Eupetomena macroura (Gmelin, 1788)]. Wiki Aves - A Enciclopédia das Aves do Brasil. Disponível em:	http://www.wikiaves.com/4071877
Eupetomena_macroura	Heliconia psittacorum	Legitimate	Indeterminado	yes	Paulo Valadao	2020-10-17	2020-11-06	Campinas/SP	VALADAO, P. R. (2020). [WA4061022, Eupetomena macroura (Gmelin, 1788)]. Wiki Aves - A Enciclopédia das Aves do Brasil. Disponível em:	http://www.wikiaves.com/4061022
Eupetomena_macroura	Erythrina speciosa	Legitimate	Indeterminado	Not determined	Roberto Gomes	2020-06-11	2020-11-02	Sorocaba/SP	SOUZA, R. G. (2020). [WA4052317, Eupetomena macroura (Gmelin, 1788)]. Wiki Aves - A Enciclopédia das Aves do Brasil. Disponível em:	http://www.wikiaves.com/4052317
Eupetomena_macroura	Erythrina speciosa	Legitimate	Indeterminado	Not determined	Omar Cardoso	2020-07-27	2020-10-24	Joinville/SC	CARDOSO, O. J. (2020). [WA4035811, Eupetomena macroura (Gmelin, 1788)]. Wiki Aves - A Enciclopédia das Aves do Brasil. Disponível em:	http://www.wikiaves.com/4035811
Eupetomena_macroura	Nicotiana	Legitimate	Indeterminado	yes	Alan Glauco	2020-10-04	2020-10-23	Queimada Nova/PI	MEDEIROS, A. G. (2020). [WA4036126, Eupetomena macroura (Gmelin, 1788)]. Wiki Aves - A Enciclopédia das Aves do Brasil. Disponível em:	http://www.wikiaves.com/4036126
Eupetomena_macroura	Erythrina speciosa	Legitimate	Indeterminado	Not determined	Omar Cardoso	2020-08-01	2020-10-23	Joinville/SC	CARDOSO, O. J. (2020). [WA4035815, Eupetomena macroura (Gmelin, 1788)]. Wiki Aves - A Enciclopédia das Aves do Brasil. Disponível em:	http://www.wikiaves.com/4035815
Eupetomena_macroura	Qualea parviflora	Legitimate	Indeterminado	yes	Claudia Barros	2020-10-21	2020-10-21	Brasília/DF	BARROS, C. (2020). [WA4032073, Eupetomena macroura (Gmelin, 1788)]. Wiki Aves - A Enciclopédia das Aves do Brasil. Disponível em:	http://www.wikiaves.com/4032073
Eupetomena_macroura	Jacaranda mimosifolia	Legitimate	Indeterminado	yes	Henrique Guerra	2020-10-18	2020-10-18	Carazinho/RS	GUERRA, H. O. (2020). [WA4025095, Eupetomena macroura (Gmelin, 1788)]. Wiki Aves - A Enciclopédia das Aves do Brasil. Disponível em:	http://www.wikiaves.com/4025095
Eupetomena_macroura	Erythrina velutina	Legitimate	Indeterminado	yes	Darcio Benavides	2020-10-09	2020-10-16	Cesário Lange/SP	BENAVIDES, D. (2020). [WA4021667, Eupetomena macroura (Gmelin, 1788)]. Wiki Aves - A Enciclopédia das Aves do Brasil. Disponível em:	http://www.wikiaves.com/4021667
Eupetomena_macroura	Erythrina crista-galli	Legitimate	Indeterminado	yes	Gustavo Borim	2020-09-13	2020-09-13	Avaré/SP	BORIM, G. (2020). [WA3970365, Eupetomena macroura (Gmelin, 1788)]. Wiki Aves - A Enciclopédia das Aves do Brasil. Disponível em:	http://www.wikiaves.com/3970365
Eupetomena_macroura	Carica papaya	Legitimate	Indeterminado	yes	Thiago Malheiros	2020-09-13	2020-09-13	Santo Expedito/SP	MALHEIROS, T. Z. (2020). [WA3970145, Eupetomena macroura (Gmelin, 1788)]. Wiki Aves - A Enciclopédia das Aves do Brasil. Disponível em:	http://www.wikiaves.com/3970145
Eupetomena_macroura	Inga	Legitimate	Indeterminado	yes	Jose Junior 7	2020-09-02	2020-09-13	Jundiaí/SP	MARTINS, J. (2020). [WA3969966, Eupetomena macroura (Gmelin, 1788)]. Wiki Aves - A Enciclopédia das Aves do Brasil. Disponível em:	http://www.wikiaves.com/3969966
Eupetomena_macroura	Erythrina speciosa	Legitimate	Indeterminado	Not determined	Vanessa Silveira	2020-08-29	2020-08-30	Assis/SP	SILVEIRA, V. (2020). [WA3949067, Eupetomena macroura (Gmelin, 1788)]. Wiki Aves - A Enciclopédia das Aves do Brasil. Disponível em:	http://www.wikiaves.com/3949067
Eupetomena_macroura	Bougainvillea	Legitimate	Indeterminado	yes	Thiago Nascimento S. Campos	2020-08-08	2020-08-16	Campo Alegre de Goiás/GO	CAMPOS, T. N. (2020). [WA3926210, Eupetomena macroura (Gmelin, 1788)]. Wiki Aves - A Enciclopédia das Aves do Brasil. Disponível em:	http://www.wikiaves.com/3926210
Eupetomena_macroura	Musa	Legitimate	Indeterminado	yes	Teca Resende	2020-08-10	2020-08-10	Santana do Garambéu/MG	RESENDE, T. C. (2020). [WA3919403, Eupetomena macroura (Gmelin, 1788)]. Wiki Aves - A Enciclopédia das Aves do Brasil. Disponível em:	http://www.wikiaves.com/3919403
Eupetomena_macroura	Inga	Legitimate	Indeterminado	yes	Márcia Avelar	2020-08-10	2020-08-15	São Thomé das Letras/MG	AVELAR, M. (2020). [WA3924909, Eupetomena macroura (Gmelin, 1788)]. Wiki Aves - A Enciclopédia das Aves do Brasil. Disponível em:	http://www.wikiaves.com/3924909
Eupetomena_macroura	Sanchezia	Legitimate	Indeterminado	Not determined	Benjamin Blanco	2020-08-01	2020-08-01	Belo Horizonte/MG	SOUZA, C. B. (2020). [WA3905138, Eupetomena macroura (Gmelin, 1788)]. Wiki Aves - A Enciclopédia das Aves do Brasil. Disponível em:	http://www.wikiaves.com/3905138
Eupetomena_macroura	Grevillea banksii	Legitimate	Indeterminado	yes	Leandro Rios	2020-07-29	2020-07-29	Macaé/RJ	RIOS, L. O. (2020). [WA3900318, Eupetomena macroura (Gmelin, 1788)]. Wiki Aves - A Enciclopédia das Aves do Brasil. Disponível em:	http://www.wikiaves.com/3900318
Eupetomena_macroura	Thunbergia grandiflora	Legitimate	Indeterminado	yes	Carlos E. Rodrigues	2020-07-26	2020-07-29	Amparo/SP	RODRIGUES, C. E. (2020). [WA3899830, Eupetomena macroura (Gmelin, 1788)]. Wiki Aves - A Enciclopédia das Aves do Brasil. Disponível em:	http://www.wikiaves.com/3899830
Eupetomena_macroura	Clerodendrum quadriloculare	Legitimate	Indeterminado	yes	Cláudio Santoro	2020-07-11	2020-07-12	Saquerema/RJ	SANTORO, C. (2020). [WA3874863, Eupetomena macroura (Gmelin, 1788)]. Wiki Aves - A Enciclopédia das Aves do Brasil. Disponível em:	http://www.wikiaves.com/3874863
Eupetomena_macroura	Abutilon	Legitimate	Indeterminado	yes	Manoel Freitas	2020-07-07	2020-07-07	Botumirim/MG	REIS, M. F. (2020). [WA3867743, Eupetomena macroura (Gmelin, 1788)]. Wiki Aves - A Enciclopédia das Aves do Brasil. Disponível em:	http://www.wikiaves.com/3867743
Eupetomena_macroura	Zeyheria montana	Legitimate	Indeterminado	yes	Felipe Dornas	2020-07-03	2020-07-03	Lagoa Santa/MG	DORNAS, F. (2020). [WA3862901, Eupetomena macroura (Gmelin, 1788)]. Wiki Aves - A Enciclopédia das Aves do Brasil. Disponível em:	http://www.wikiaves.com/3862901
Eupetomena_macroura	Myroxylon peruiferum	Legitimate	Indeterminado	yes	Clenia Farias	2020-06-22	2020-07-02	Delfinópolis/MG	FARIAS, C. L. (2020). [WA3861602, Eupetomena macroura (Gmelin, 1788)]. Wiki Aves - A Enciclopédia das Aves do Brasil. Disponível em:	http://www.wikiaves.com/3861602
Eupetomena_macroura	Pyrostegia venusta	Legitimate	Indeterminado	Not determined	Bruno Almeida 2	2020-06-20	2020-06-20	Pouso Alegre/MG	ALMEIDA, B. (2020). [WA3844867, Eupetomena macroura (Gmelin, 1788)]. Wiki Aves - A Enciclopédia das Aves do Brasil. Disponível em:	http://www.wikiaves.com/3844867
Eupetomena_macroura	Grevillea banksii	Legitimate	Indeterminado	yes	Antonio Carlos Iglesias	2020-06-17	2020-06-17	São Bento do Sapucaí/SP	IGLESIAS, A. C. (2020). [WA3841329, Eupetomena macroura (Gmelin, 1788)]. Wiki Aves - A Enciclopédia das Aves do Brasil. Disponível em:	http://www.wikiaves.com/3841329
Eupetomena_macroura	Zeyheria montana	Legitimate	Indeterminado	yes	Gustavo de Melo Martins	2020-06-09	2020-06-09	Matozinhos/MG	MARTINS, G. M. (2020). [WA3831508, Eupetomena macroura (Gmelin, 1788)]. Wiki Aves - A Enciclopédia das Aves do Brasil. Disponível em:	http://www.wikiaves.com/3831508
Eupetomena_macroura	Russelia sp	Legitimate	Indeterminado	yes	Alexandre Callou Sampaio	2020-05-10	2020-05-10	Barbalha/CE	SAMPAIO, A. C. (2020). [WA3793776, Eupetomena macroura (Gmelin, 1788)]. Wiki Aves - A Enciclopédia das Aves do Brasil. Disponível em:	http://www.wikiaves.com/3793776
Eupetomena_macroura	Euphorbia pulcherrima	Legitimate	Indeterminado	Not determined	Alcione Netto	2020-05-14	2020-05-20	Francisco Beltrão/PR	NETTO, A. C. (2020). [WA3805801, Eupetomena macroura (Gmelin, 1788)]. Wiki Aves - A Enciclopédia das Aves do Brasil. Disponível em:	http://www.wikiaves.com/3805801
Eupetomena_macroura	Salvia	Legitimate	Indeterminado	yes	Zelia Tosta	2021-04-18	2021-05-05	Pouso Alegre/MG	TOSTA, Z. (2021). [WA4297161, Eupetomena macroura (Gmelin, 1788)]. Wiki Aves - A Enciclopédia das Aves do Brasil. Disponível em:	http://www.wikiaves.com/4297161
Eupetomena_macroura	Pachystachys lutea	Legitimate	Indeterminado	yes	Marcia Koch Rodrigues	2021-03-23	2021-05-05	Santo Ângelo/RS	RODRIGUES, M. K. (2021). [WA4297146, Eupetomena macroura (Gmelin, 1788)]. Wiki Aves - A Enciclopédia das Aves do Brasil. Disponível em:	http://www.wikiaves.com/4297146
Eupetomena_macroura	Grevillea banksii	Legitimate	Indeterminado	yes	Leandro Rios	2021-05-05	2021-05-05	Macaé/RJ	RIOS, L. O. (2021). [WA4297115, Eupetomena macroura (Gmelin, 1788)]. Wiki Aves - A Enciclopédia das Aves do Brasil. Disponível em:	http://www.wikiaves.com/4297115
Eupetomena_macroura	Herissantia	Legitimate	Indeterminado	yes	Alexander Sezko	2021-04-21	2021-04-27	Ibiaí/MG	SEZKO, A. (2021). [WA4286631, Eupetomena macroura (Gmelin, 1788)]. Wiki Aves - A Enciclopédia das Aves do Brasil. Disponível em:	http://www.wikiaves.com/4286631
Eupetomena_macroura	Bougainvillea	Legitimate	Indeterminado	yes	Marcelo B	2021-04-17	2021-04-17	São Paulo/SP	BOOG, M. (2021). [WA4272684, Eupetomena macroura (Gmelin, 1788)]. Wiki Aves - A Enciclopédia das Aves do Brasil. Disponível em:	http://www.wikiaves.com/4272684
Eupetomena_macroura	Grevillea banksii	Legitimate	Indeterminado	yes	Leandro Rios	2021-04-11	2021-04-11	Macaé/RJ	RIOS, L. O. (2021). [WA4265619, Eupetomena macroura (Gmelin, 1788)]. Wiki Aves - A Enciclopédia das Aves do Brasil. Disponível em:	http://www.wikiaves.com/4265619
Eupetomena_macroura	Melocactus	Legitimate	Indeterminado	yes	Reinaldo Barros.	2021-04-04	2021-04-04	Parelhas/RN	SOUSA, R. B. (2021). [WA4259056, Eupetomena macroura (Gmelin, 1788)]. Wiki Aves - A Enciclopédia das Aves do Brasil. Disponível em:	http://www.wikiaves.com/4259056
Eupetomena_macroura	Melocactus	Legitimate	Indeterminado	yes	Reinaldo Barros.	2021-03-28	2021-03-28	Parelhas/RN	SOUSA, R. B. (2021). [WA4250752, Eupetomena macroura (Gmelin, 1788)]. Wiki Aves - A Enciclopédia das Aves do Brasil. Disponível em:	http://www.wikiaves.com/4250752
Eupetomena_macroura	Tillandsia	Legitimate	Indeterminado	yes	Ricardo de Mello da Silva	2020-09-17	2021-03-24	Palmeira das Missões/RS	SILVA, R. M. (2020). [WA4246293, Eupetomena macroura (Gmelin, 1788)]. Wiki Aves - A Enciclopédia das Aves do Brasil. Disponível em:	http://www.wikiaves.com/4246293
Eupetomena_macroura	Aechmea aquilega	Legitimate	Indeterminado	yes	Ronaldo Francisco	2021-03-24	2021-03-24	Simão Dias/SE	FRANCISCO, R. D. (2021). [WA4245950, Eupetomena macroura (Gmelin, 1788)]. Wiki Aves - A Enciclopédia das Aves do Brasil. Disponível em:	http://www.wikiaves.com/4245950
Eupetomena_macroura	Palicourea rigida	Legitimate	Indeterminado	yes	Diego S. Gomes	2021-02-19	2021-03-22	Uberlândia/MG	GOMES, D. B. (2021). [WA4243895, Eupetomena macroura (Gmelin, 1788)]. Wiki Aves - A Enciclopédia das Aves do Brasil. Disponível em:	http://www.wikiaves.com/4243895
Eupetomena_macroura	Holmskioldia	Legitimate	Indeterminado	yes	Daniel Gasparian	2021-03-07	2021-03-08	Araçoiaba da Serra/SP	GASPARIAN, D. (2021). [WA4226999, Eupetomena macroura (Gmelin, 1788)]. Wiki Aves - A Enciclopédia das Aves do Brasil. Disponível em:	http://www.wikiaves.com/4226999
Eupetomena_macroura	Heliconia psittacorum	Legitimate	Indeterminado	Not determined	Madalena Arantes da Silva	2021-03-02	2021-03-03	Rio Verde/GO	SILVA, M. A. (2021). [WA4222127, Eupetomena macroura (Gmelin, 1788)]. Wiki Aves - A Enciclopédia das Aves do Brasil. Disponível em:	http://www.wikiaves.com/4222127
Eupetomena_macroura	Heliconia psittacorum	Legitimate	Indeterminado	Not determined	Madalena Arantes da Silva	2021-03-03	2021-03-03	Rio Verde/GO	SILVA, M. A. (2021). [WA4222128, Eupetomena macroura (Gmelin, 1788)]. Wiki Aves - A Enciclopédia das Aves do Brasil. Disponível em:	http://www.wikiaves.com/4222128
Eupetomena_macroura	Heliconia psittacorum	Legitimate	Indeterminado	Not determined	Madalena Arantes da Silva	2021-03-03	2021-03-03	Rio Verde/GO	SILVA, M. A. (2021). [WA4222130, Eupetomena macroura (Gmelin, 1788)]. Wiki Aves - A Enciclopédia das Aves do Brasil. Disponível em:	http://www.wikiaves.com/4222130
Eupetomena_macroura	Russelia sp	Legitimate	Indeterminado	Not determined	Marcio Muniz de Farias	2020-12-05	2021-03-02	Brasília/DF	FARIAS, M. M. (2020). [WA4221064, Eupetomena macroura (Gmelin, 1788)]. Wiki Aves - A Enciclopédia das Aves do Brasil. Disponível em:	http://www.wikiaves.com/4221064
Eupetomena_macroura	Callistemon sp	Legitimate	Indeterminado	yes	Marcelo E Salgado	2021-02-21	2021-02-22	Conselheiro Lafaiete/MG	SALGADO, M. E. (2021). [WA4212509, Eupetomena macroura (Gmelin, 1788)]. Wiki Aves - A Enciclopédia das Aves do Brasil. Disponível em:	http://www.wikiaves.com/4212509
Eupetomena_macroura	Stifftia chrysantha	Legitimate	Indeterminado	yes	Paulo Valadao	2021-02-19	2021-02-19	Campinas/SP	VALADAO, P. R. (2021). [WA4208800, Eupetomena macroura (Gmelin, 1788)]. Wiki Aves - A Enciclopédia das Aves do Brasil. Disponível em:	http://www.wikiaves.com/4208800
Eupetomena_macroura	Stifftia chrysantha	Legitimate	Indeterminado	yes	Paulo Valadao	2021-02-19	2021-02-19	Campinas/SP	VALADAO, P. R. (2021). [WA4208796, Eupetomena macroura (Gmelin, 1788)]. Wiki Aves - A Enciclopédia das Aves do Brasil. Disponível em:	http://www.wikiaves.com/4208796
Eupetomena_macroura	Stifftia chrysantha	Legitimate	Indeterminado	yes	Paulo Valadao	2021-02-16	2021-02-17	Campinas/SP	VALADAO, P. R. (2021). [WA4205909, Eupetomena macroura (Gmelin, 1788)]. Wiki Aves - A Enciclopédia das Aves do Brasil. Disponível em:	http://www.wikiaves.com/4205909
Eupetomena_macroura	Stifftia chrysantha	Legitimate	Indeterminado	yes	Paulo Valadao	2021-02-07	2021-02-07	Campinas/SP	VALADAO, P. R. (2021). [WA4193258, Eupetomena macroura (Gmelin, 1788)]. Wiki Aves - A Enciclopédia das Aves do Brasil. Disponível em:	http://www.wikiaves.com/4193258
Eupetomena_macroura	Ruellia simplex	Legitimate	Indeterminado	yes	Thiago Almeida Lopes	2021-02-02	2021-02-03	Sete Lagoas/MG	LOPES, T. A. (2021). [WA4189132, Eupetomena macroura (Gmelin, 1788)]. Wiki Aves - A Enciclopédia das Aves do Brasil. Disponível em:	http://www.wikiaves.com/4189132
Eupetomena_macroura	Erythrina crista-galli	Legitimate	Indeterminado	yes	Humberto Mancuso	2020-08-14	2021-01-20	Campinas/SP	MANCUSO, H. (2020). [WA4170785, Eupetomena macroura (Gmelin, 1788)]. Wiki Aves - A Enciclopédia das Aves do Brasil. Disponível em:	http://www.wikiaves.com/4170785
Eupetomena_macroura	Strelitzia reginae	Legitimate	Indeterminado	yes	Pedro A. Anselmo	2021-01-15	2021-01-15	Belo Horizonte/MG	ANSELMO, P. A. (2021). [WA4164399, Eupetomena macroura (Gmelin, 1788)]. Wiki Aves - A Enciclopédia das Aves do Brasil. Disponível em:	http://www.wikiaves.com/4164399
Eupetomena_macroura	Strelitzia reginae	Legitimate	Indeterminado	yes	Pedro A. Anselmo	2020-11-01	2021-01-15	Belo Horizonte/MG	ANSELMO, P. A. (2020). [WA4164401, Eupetomena macroura (Gmelin, 1788)]. Wiki Aves - A Enciclopédia das Aves do Brasil. Disponível em:	http://www.wikiaves.com/4164401
Eupetomena_macroura	Ixora	Legitimate	Indeterminado	yes	Paulo Valadao	2021-02-07	2021-02-07	Campinas/SP	VALADAO, P. R. (2021). [WA4153401, Eupetomena macroura (Gmelin, 1788)]. Wiki Aves - A Enciclopédia das Aves do Brasil. Disponível em:	http://www.wikiaves.com/4153401
Eupetomena_macroura	Hibiscus	Legitimate	Indeterminado	yes	Etevour Perusso	2021-01-05	2021-01-09	Araraquara/SP	PERUSSO, E. J. (2021). [WA4155019, Eupetomena macroura (Gmelin, 1788)]. Wiki Aves - A Enciclopédia das Aves do Brasil. Disponível em:	http://www.wikiaves.com/4155019
Eupetomena_macroura	Agave	Legitimate	Indeterminado	yes	Fabio S. Santos	2020-12-23	2020-12-23	Triunfo/PE	SANTOS, F. S. (2020). [WA4131010, Eupetomena macroura (Gmelin, 1788)]. Wiki Aves - A Enciclopédia das Aves do Brasil. Disponível em:	http://www.wikiaves.com/4131010
Eupetomena_macroura	Callistemon sp	Legitimate	Indeterminado	yes	Roberto C. Lemos	2020-12-06	2020-12-14	Foz do Iguaçu/PR	LEMOS, R. C. (2020). [WA4118426, Eupetomena macroura (Gmelin, 1788)]. Wiki Aves - A Enciclopédia das Aves do Brasil. Disponível em:	http://www.wikiaves.com/4118426
Eupetomena_macroura	Hibiscus sp	Legitimate	Indeterminado	yes	Anderson Oliveira 2	2020-12-06	2020-12-08	Caconde/SP	OLIVEIRA, A. (2020). [WA4111015, Eupetomena macroura (Gmelin, 1788)]. Wiki Aves - A Enciclopédia das Aves do Brasil. Disponível em:	http://www.wikiaves.com/4111015
Eupetomena_macroura	Melocactus	Legitimate	Indeterminado	yes	Ermerson Sharbel	2020-07-11	2020-12-03	Nova Palmeira/PB	DIAS, E. S. (2020). [WA4103274, Eupetomena macroura (Gmelin, 1788)]. Wiki Aves - A Enciclopédia das Aves do Brasil. Disponível em:	http://www.wikiaves.com/4103274
Eupetomena_macroura	Passiflora	Legitimate	Indeterminado	yes	Rafael Martos Martins	2020-11-29	2020-11-29	Pirajuí/SP	MARTOS-MARTINS, R. (2020). [WA4096851, Eupetomena macroura (Gmelin, 1788)]. Wiki Aves - A Enciclopédia das Aves do Brasil. Disponível em:	http://www.wikiaves.com/4096851
Eupetomena_macroura	Agave americana	Theft	Not determined	yes	Jose Amaya	2017-04-27	2017-06-01	Pacoti/CE	AMAYA, J. R. (2017). [WA2575274, Eupetomena macroura (Gmelin, 1788)]. Wiki Aves - A Enciclopédia das Aves do Brasil. Disponível em: <http://www.wikiaves.com/2575274> Acesso em: 10 Ago 2019.	http://www.wikiaves.com/2575274
Eupetomena_macroura	Ceiba speciosa	Theft	Not determined	yes	Maceto ( Marcelo Aceto )	2017-03-29	2017-03-29	Chapecó/SC	ACETO, M. (2017). [WA2510461, Eupetomena macroura (Gmelin, 1788)]. Wiki Aves - A Enciclopédia das Aves do Brasil. Disponível em: <http://www.wikiaves.com/2510461> Acesso em: 10 Ago 2019.	http://www.wikiaves.com/2510461
Eupetomena_macroura	Hedychium coccineum	Theft	Not determined	Not determined	Zé Edu Camargo	2010-01-01	2010-01-03	Nepomuceno/MG	CAMARGO, J. E. (2010). [WA95112, Eupetomena macroura (Gmelin, 1788)]. Wiki Aves - A Enciclopédia das Aves do Brasil. Disponível em: <http://www.wikiaves.com/95112> Acesso em: 03 Set 2019.	http://www.wikiaves.com/95112
Eupetomena_macroura	Hibiscus	Theft	Not determined	yes	Rafael Macedo	2013-03-18	2013-04-03	Ilhéus/BA	MACEDO, R. N. (2013). [WA925633, Eupetomena macroura (Gmelin, 1788)]. Wiki Aves - A Enciclopédia das Aves do Brasil. Disponível em: <http://www.wikiaves.com/925633> Acesso em: 20 Ago 201	http://www.wikiaves.com/925633
Eupetomena_macroura	Inga	Theft	Not determined	yes	Ricardo Guimarães	2018-10-27	2018-12-02	São Paulo/SP	GUIMARÃES, R. H. (2018). [WA3199725, Eupetomena macroura (Gmelin, 1788)]. Wiki Aves - A Enciclopédia das Aves do Brasil. Disponível em: <http://www.wikiaves.com/3199725> Acesso em: 06 Ago 2019.	http://www.wikiaves.com/3199725
Eupetomena_macroura	Inga	Theft	Not determined	yes	Thiago Zanetti	2017-11-24	2017-11-24	Areia/PB	ZANETTI, T. (2017). [WA2792815, Eupetomena macroura (Gmelin, 1788)]. Wiki Aves - A Enciclopédia das Aves do Brasil. Disponível em: <http://www.wikiaves.com/2792815> Acesso em: 09 Ago 2019.	http://www.wikiaves.com/2792815
Eupetomena_macroura	Combretum	Theft	Not determined	Not determined	Erika Hingst-Zaher	2018-01-27	2018-01-30	Rio de Janeiro/RJ	HINGST-ZAHER, E. (2018). [WA2867569, Eupetomena macroura (Gmelin, 1788)]. Wiki Aves - A Enciclopédia das Aves do Brasil. Disponível em: <http://www.wikiaves.com/2867569> Acesso em: 09 Ago 2019.	http://www.wikiaves.com/2867569
Eupetomena_macroura	Inga	Theft	Not determined	yes	Natan Bulla Florczak	2013-10-24	2013-10-24	São Miguel do Oeste/SC	FLORCZAK, N. B. (2013). [WA1131069, Eupetomena macroura (Gmelin, 1788)]. Wiki Aves - A Enciclopédia das Aves do Brasil. Disponível em: <http://www.wikiaves.com/1131069> Acesso em: 13 Ago 2019.	http://www.wikiaves.com/1131069
Eupetomena_macroura	Passiflora	Theft	Not determined	yes	Dori Otoni	2012-12-27	2013-02-02	Goiânia/GO	OTONI, D. (2012). [WA873944, Eupetomena macroura (Gmelin, 1788)]. Wiki Aves - A Enciclopédia das Aves do Brasil. Disponível em: <http://www.wikiaves.com/873944> Acesso em: 21 Ago 2019.	http://www.wikiaves.com/873944
Eupetomena_macroura	Delonix regia	Theft	Indeterminado	yes	Julio Filipino (filipino)	2020-10-21	2020-11-03	Cristais Paulista/SP	FILIPINO, J. C. (2020). [WA4055633, Eupetomena macroura (Gmelin, 1788)]. Wiki Aves - A Enciclopédia das Aves do Brasil. Disponível em:	http://www.wikiaves.com/4055633
Eupetomena_macroura	Apocynaceae	Theft	Indeterminado	yes	Marcos Barroso	2020-09-20	2020-10-20	Rosário da Limeira/MG	BARROSO, M. B. (2020). [WA4029738, Eupetomena macroura (Gmelin, 1788)]. Wiki Aves - A Enciclopédia das Aves do Brasil. Disponível em:	http://www.wikiaves.com/4029738
Eupetomena_macroura	Caryocar brasiliense	Theft	Indeterminado	yes	Renato Ferraz	2020-09-29	2020-09-29	Brasília/DF	FERRAZ, R. (2020). [WA3996126, Eupetomena macroura (Gmelin, 1788)]. Wiki Aves - A Enciclopédia das Aves do Brasil. Disponível em:	http://www.wikiaves.com/3996126
Eupetomena_macroura	Agave	Theft	Indeterminado	yes	Alvaro Silveira	2020-08-28	2020-09-15	Brasília/DF	SILVEIRA, A. F. (2020). [WA3974190, Eupetomena macroura (Gmelin, 1788)]. Wiki Aves - A Enciclopédia das Aves do Brasil. Disponível em:	http://www.wikiaves.com/3974190
Eupetomena_macroura	Erythrina speciosa	Theft	Indeterminado	yes	Conrado Pável	2020-09-05	2020-09-05	Juiz de Fora/MG	OLIVEIRA, C. P. (2020). [WA3957924, Eupetomena macroura (Gmelin, 1788)]. Wiki Aves - A Enciclopédia das Aves do Brasil. Disponível em:	http://www.wikiaves.com/3957924
Eupetomena_macroura	Agave	Theft	Indeterminado	yes	Flávio Benites	2020-05-31	2020-07-15	Rio Preto/MG	BENITES, F. R. (2020). [WA3878232, Eupetomena macroura (Gmelin, 1788)]. Wiki Aves - A Enciclopédia das Aves do Brasil. Disponível em:	http://www.wikiaves.com/3878232
Eupetomena_macroura	Pseudobombax	Theft	Indeterminado	yes	Guilherme G. Lopes	2020-05-09	2020-06-30	Piracicaba/SP	LOPES, G. G. (2020). [WA3859403, Eupetomena macroura (Gmelin, 1788)]. Wiki Aves - A Enciclopédia das Aves do Brasil. Disponível em:	http://www.wikiaves.com/3859403
Eupetomena_macroura	Thunbergia mysorensis	Theft	Indeterminado	yes	Daniel Rêgo	2020-05-28	2020-05-29	Brasília/DF	RÊGO, D. N. (2020). [WA3816502, Eupetomena macroura (Gmelin, 1788)]. Wiki Aves - A Enciclopédia das Aves do Brasil. Disponível em:	http://www.wikiaves.com/3816502
Eupetomena_macroura	Callistemon sp	Theft	Indeterminado	Not determined	Regina Manzur	2020-07-05	2021-04-25	Indaiatuba/SP	MANZUR, R. B. (2020). [WA4282921, Eupetomena macroura (Gmelin, 1788)]. Wiki Aves - A Enciclopédia das Aves do Brasil. Disponível em:	http://www.wikiaves.com/4282921
Eupetomena_macroura	Ceiba sp	Theft	Indeterminado	yes	Lucas Sobral dos Santos	2021-03-20	2021-03-21	Regente Feijó/SP	SANTOS, L. S. (2021). [WA4242920, Eupetomena macroura (Gmelin, 1788)]. Wiki Aves - A Enciclopédia das Aves do Brasil. Disponível em:	http://www.wikiaves.com/4242920
Eupetomena_macroura	Strelitzia reginae	Theft	Indeterminado	yes	Francisco Boiani	2021-01-30	2021-02-03	Santo André/SP	BOIANI, F. E. (2021). [WA4188527, Eupetomena macroura (Gmelin, 1788)]. Wiki Aves - A Enciclopédia das Aves do Brasil. Disponível em:	http://www.wikiaves.com/4188527
Eupetomena_macroura	Passiflora	Theft	Indeterminado	yes	Rose Passarinho	2021-01-14	2021-01-19	Maraú/BA	RODRIGUES, R. M. (2021). [WA4169729, Eupetomena macroura (Gmelin, 1788)]. Wiki Aves - A Enciclopédia das Aves do Brasil. Disponível em:	http://www.wikiaves.com/4169729
Eupetomena_macroura	Handroanthus	Robber	Not determined	yes	Dercelino Teodoro	2017-08-22	2017-08-25	Bebedouro/SP	TEODORO, D. (2017). [WA2671833, Eupetomena macroura (Gmelin, 1788)]. Wiki Aves - A Enciclopédia das Aves do Brasil. Disponível em: <http://www.wikiaves.com/2671833> Acesso em: 09 Ago 2019.	http://www.wikiaves.com/2671833
Eupetomena_macroura	Handroanthus	Robber	Not determined	yes	Alexandre Correia	2014-08-31	2014-09-01	Mairiporã/SP	CORREIA, A. G. (2014). [WA1437500, Eupetomena macroura (Gmelin, 1788)]. Wiki Aves - A Enciclopédia das Aves do Brasil. Disponível em: <http://www.wikiaves.com/1437500> Acesso em: 11 Ago 2019.	http://www.wikiaves.com/1437500
Eupetomena_macroura	Malvaviscus arboreus Cav.	Robber	Not determined	yes	Vinícius Miranda	2014-07-03	2014-07-20	Lamim/MG	ALVES, V. O. (2014). [WA1390019, Eupetomena macroura (Gmelin, 1788)]. Wiki Aves - A Enciclopédia das Aves do Brasil. Disponível em: <http://www.wikiaves.com/1390019> Acesso em: 11 Ago 2019.	http://www.wikiaves.com/1390019
Eupetomena_macroura	Malvaviscus arboreus	Robber	Not determined	yes	JJ Stupka	2015-06-02	2015-06-05	Quitandinha/PR	STUPKA, J. (2015). [WA1715035, Eupetomena macroura (Gmelin, 1788)]. Wiki Aves - A Enciclopédia das Aves do Brasil. Disponível em: <http://www.wikiaves.com/1715035> Acesso em: 11 Ago 2019.	http://www.wikiaves.com/1715035
Eupetomena_macroura	Malvaviscus arboreus	Robber	Not determined	yes	Wilde Lacerda	2013-03-17	2013-07-28	Socorro/SP	LACERDA, W. A. (2013). [WA1030603, Eupetomena macroura (Gmelin, 1788)]. Wiki Aves - A Enciclopédia das Aves do Brasil. Disponível em: <http://www.wikiaves.com/1030603> Acesso em: 19 Ago 2019	http://www.wikiaves.com/1030603
Eupetomena_macroura	Hibiscus	Robber	Not determined	yes	Sergio Motta	2012-11-10	2012-12-08	Embu das Artes/SP	MOTTA, S. A. (2012). [WA825773, Eupetomena macroura (Gmelin, 1788)]. Wiki Aves - A Enciclopédia das Aves do Brasil. Disponível em: <http://www.wikiaves.com/825773> Acesso em: 21 Ago 2019.	http://www.wikiaves.com/825773
Eupetomena_macroura	Passiflora	Robber	Not determined	yes	Luciano Malanski	2012-12-26	2013-01-01	Brasília/DF	MALANSKI, L. S. (2012). [WA842956, Eupetomena macroura (Gmelin, 1788)]. Wiki Aves - A Enciclopédia das Aves do Brasil. Disponível em: <http://www.wikiaves.com/842956> Acesso em: 21 Ago 2019.	http://www.wikiaves.com/842956
Eupetomena_macroura	Jacaranda	Robber	Not determined	yes	Izanildo Sabino	2014-03-17	2014-03-26	Vila Velha/ES	SABINO, I. (2014). [WA1283173, Eupetomena macroura (Gmelin, 1788)]. Wiki Aves - A Enciclopédia das Aves do Brasil. Disponível em: <http://www.wikiaves.com/1283173> Acesso em: 13 Ago 2019.	http://www.wikiaves.com/1283173
Eupetomena_macroura	Salvia	Robber	Not determined	yes	José Cristovão Leal Corrêa	2019-05-12	2019-05-29	Ponta Grossa/PR	CORRÊA, J. C. (2019). [WA3372110, Eupetomena macroura (Gmelin, 1788)]. Wiki Aves - A Enciclopédia das Aves do Brasil. Disponível em: <http://www.wikiaves.com/3372110> Acesso em: 05 Ago 2019.	http://www.wikiaves.com/3372110
Eupetomena_macroura	Spathodea campanulata	Robber	Not determined	yes	Leonardo Lima Bergamini	2016-06-11	2016-06-13	Goiânia/GO	BERGAMINI, L. L. (2016). [WA2154625, Eupetomena macroura (Gmelin, 1788)]. Wiki Aves - A Enciclopédia das Aves do Brasil. Disponível em: <http://www.wikiaves.com/2154625> Acesso em: 10 Ago 2019.	http://www.wikiaves.com/2154625
Eupetomena_macroura	Spathodea campanulata	Robber	Not determined	yes	Marcos Barbosa e Souza	2012-12-16	2012-12-18	Lavras/MG	SOUZA, M. B. (2012). [WA833166, Eupetomena macroura (Gmelin, 1788)]. Wiki Aves - A Enciclopédia das Aves do Brasil. Disponível em: <http://www.wikiaves.com/833166> Acesso em: 21 Ago 2019.	http://www.wikiaves.com/833166
Eupetomena_macroura	Aloe	Robber	Indeterminado	Not determined	Eduardo Borges	2020-09-02	2020-11-14	Brasília/DF	FELIPPE, E. B. (2020). [WA4061333, Eupetomena macroura (Gmelin, 1788)]. Wiki Aves - A Enciclopédia das Aves do Brasil. Disponível em:	http://www.wikiaves.com/4061333
Eupetomena_macroura	Handroanthus	Robber	Indeterminado	yes	Birds	2020-06-01	2020-09-08	São José dos Campos/SP	MIRANDA, P. R. (2020). [WA3962782, Eupetomena macroura (Gmelin, 1788)]. Wiki Aves - A Enciclopédia das Aves do Brasil. Disponível em:	http://www.wikiaves.com/3962782
Eupetomena_macroura	Handroanthus	Robber	Indeterminado	yes	Manoel Freitas	2020-08-30	2020-08-30	Botumirim/MG	REIS, M. F. (2020). [WA3948650, Eupetomena macroura (Gmelin, 1788)]. Wiki Aves - A Enciclopédia das Aves do Brasil. Disponível em:	http://www.wikiaves.com/3948650
Eupetomena_macroura	Malvaviscus arboreus	Robber	Indeterminado	Not determined	Nilton F. Silva	2020-08-21	2020-08-22	Nova Campina/SP	SILVA, N. F. (2020). [WA3935897, Eupetomena macroura (Gmelin, 1788)]. Wiki Aves - A Enciclopédia das Aves do Brasil. Disponível em:	http://www.wikiaves.com/3935897
Eupetomena_macroura	Spathodea campanulata	Robber	Indeterminado	yes	Manoel Freitas	2020-07-06	2020-07-07	Botumirim/MG	REIS, M. F. (2020). [WA3867684, Eupetomena macroura (Gmelin, 1788)]. Wiki Aves - A Enciclopédia das Aves do Brasil. Disponível em:	http://www.wikiaves.com/3867684
Eupetomena_macroura	Callianthe striata	Robber	Indeterminado	yes	Martinho Rau	2020-05-24	2020-05-25	Witmarsum/SC	RAU, M. (2020). [WA3811485, Eupetomena macroura (Gmelin, 1788)]. Wiki Aves - A Enciclopédia das Aves do Brasil. Disponível em:	http://www.wikiaves.com/3811485
Eupetomena_macroura	Callianthe striata	Robber	Indeterminado	yes	Abelardo Mendes Jr	2020-05-20	2020-05-23	Brasília/DF	MENDES, A. (2020). [WA3808942, Eupetomena macroura (Gmelin, 1788)]. Wiki Aves - A Enciclopédia das Aves do Brasil. Disponível em:	http://www.wikiaves.com/3808942
Eupetomena_macroura	Spathodea campanulata	Robber	Indeterminado	Not determined	Dhébora Ventura	2021-04-18	2021-04-18	Brasília/DF	VENTURA, D. B. (2021). [WA4273864, Eupetomena macroura (Gmelin, 1788)]. Wiki Aves - A Enciclopédia das Aves do Brasil. Disponível em:	http://www.wikiaves.com/4273864
Eupetomena_macroura	Spathodea campanulata	Robber	Indeterminado	Not determined	Dhébora Ventura	2021-04-01	2021-04-16	Brasília/DF	VENTURA, D. B. (2021). [WA4271449, Eupetomena macroura (Gmelin, 1788)]. Wiki Aves - A Enciclopédia das Aves do Brasil. Disponível em:	http://www.wikiaves.com/4271449
Eupetomena_macroura	Spathodea campanulata	Robber	Indeterminado	Not determined	Lauro Barreto	2021-03-17	2021-03-19	Pindamonhangaba/SP	BARRETO, L. C. (2021). [WA4240619, Eupetomena macroura (Gmelin, 1788)]. Wiki Aves - A Enciclopédia das Aves do Brasil. Disponível em:	http://www.wikiaves.com/4240619
Eupetomena_macroura	Tabebuia	Robber	Indeterminado	No	Robison Silva	2020-10-18	2021-01-24	Vitória/ES	RHAVES (2020). [WA4175827, Eupetomena macroura (Gmelin, 1788)]. Wiki Aves - A Enciclopédia das Aves do Brasil. Disponível em:	http://www.wikiaves.com/4175827
Eupetomena_macroura	Spathodea campanulata	Robber	Indeterminado	yes	Lívia Queiroz	2021-01-06	2021-01-07	Coromandel/MG	QUEIROZ, L. R. (2021). [WA4152890, Eupetomena macroura (Gmelin, 1788)]. Wiki Aves - A Enciclopédia das Aves do Brasil. Disponível em:	http://www.wikiaves.com/4152890
Eupetomena_macroura	Citrus	Robber	Indeterminado	Not determined	Alan Hentz	2020-12-20	2021-01-06	São Lourenço do Oeste/SC	HENTZ, A. L. (2020). [WA4151499, Eupetomena macroura (Gmelin, 1788)]. Wiki Aves - A Enciclopédia das Aves do Brasil. Disponível em:	http://www.wikiaves.com/4151499
Eupetomena_macroura	Sanchezia	Robber	Indeterminado	Not determined	Leandro Bugni	2021-05-04	2021-05-07	São Paulo/SP	BUGNI, L. (2021). [WA4298879, Eupetomena macroura (Gmelin, 1788)]. Wiki Aves - A Enciclopédia das Aves do Brasil. Disponível em:	http://www.wikiaves.com/4298879
Florisuga_fusca	Callianthe striata (Dicks. ex Lindl.) Donnell	Legitimate	Not determined	yes	Thomaz Tozzi B. Raso	2016-01-23	2020-01-27	Monte Alegre do Sul/SP	RASO, T. T. (2016). [WA3661227, Florisuga fusca (Vieillot, 1817)]. Wiki Aves - A Enciclopédia das Aves do Brasil.Disponível em: <http://www.wikiaves.com/3661227> Acesso em: 31 Mar 2020.	http://www.wikiaves.com/3661227
Florisuga_fusca	Delonix regia (Bojer ex Hook.) Raf.	Legitimate	Not determined	yes	Allisson Cafeseiro	2016-03-14	2016-03-15	Ilhéus/BA	DIAS, A. C. (2016). [WA2053846, Florisuga fusca (Vieillot, 1817)]. Wiki Aves - A Enciclopédia das Aves do Brasil.Disponível em: <http://www.wikiaves.com/2053846> Acesso em: 02 Abr 2020.	http://www.wikiaves.com/2053846
Florisuga_fusca	Callistemon citrinus	Legitimate	Not determined	yes	Rafael Weber	2019-10-09	2019-10-18	Ribeirão Grande/SP	WEBER, R. (2019). [WA3533360, Florisuga fusca (Vieillot, 1817)]. Wiki Aves - A Enciclopédia das Aves do Brasil.Disponível em: <http://www.wikiaves.com/3533360> Acesso em: 31 Mar 2020.	http://www.wikiaves.com/3533360
Florisuga_fusca	Callistemon citrinus	Legitimate	Not determined	yes	Cesar Francischetti	2018-11-01	2018-11-02	Rio de Janeiro/RJ	FRANCISCHETTI, C. N. (2018). [WA3164617, Florisuga fusca (Vieillot, 1817)]. Wiki Aves - A Enciclopédia das Aves do Brasil.Disponível em: <http://www.wikiaves.com/3164617> Acesso em: 31 Mar 2020.	http://www.wikiaves.com/3164617
Florisuga_fusca	Callistemon citrinus	Legitimate	Not determined	Not determined	Marisa Nascimento	2019-10-14	2019-10-26	São Francisco do Sul/SC	NASCIMENTO, S. M. (2019). [WA3546007, Florisuga fusca (Vieillot, 1817)]. Wiki Aves - A Enciclopédia das Aves do Brasil.Disponível em: <http://www.wikiaves.com/3546007> Acesso em: 31 Mar 2020.	http://www.wikiaves.com/3546007
Florisuga_fusca	Callistemon citrinus	Legitimate	Not determined	yes	Fatima Wahast	2018-10-16	2018-10-18	Pelotas/RS	WAHAST, M. F. (2018). [WA3150230, Florisuga fusca (Vieillot, 1817)]. Wiki Aves - A Enciclopédia das Aves do Brasil.Disponível em: <http://www.wikiaves.com/3150230> Acesso em: 31 Mar 2020.	http://www.wikiaves.com/3150230
Florisuga_fusca	Callistemon citrinus	Legitimate	Not determined	yes	Helder Faria	2018-08-10	2018-08-14	Teodoro Sampaio/SP	FARIA, H. H. (2018). [WA3071585, Florisuga fusca (Vieillot, 1817)]. Wiki Aves - A Enciclopédia das Aves do Brasil.Disponível em: <http://www.wikiaves.com/3071585> Acesso em: 31 Mar 2020.	http://www.wikiaves.com/3071585
Florisuga_fusca	Callistemon citrinus	Legitimate	Not determined	yes	Claudio Cesar	2016-10-22	2018-06-03	São Marcos/RS	BOSSARDI, C. C. (2016). [WA2992097, Florisuga fusca (Vieillot, 1817)]. Wiki Aves - A Enciclopédia das Aves do Brasil.Disponível em: <http://www.wikiaves.com/2992097> Acesso em: 31 Mar 2020.	http://www.wikiaves.com/2992097
Florisuga_fusca	Callistemon citrinus	Legitimate	Not determined	yes	Sandro Figueiredo	2018-08-18	2018-08-20	Belo Horizonte/MG	FIGUEIREDO, S. M. (2018). [WA3079071, Florisuga fusca (Vieillot, 1817)]. Wiki Aves - A Enciclopédia das Aves do Brasil.Disponível em: <http://www.wikiaves.com/3079071> Acesso em: 31 Mar 2020.	http://www.wikiaves.com/3079071
Florisuga_fusca	Callistemon citrinus	Legitimate	Not determined	yes	Clenia Farias	2018-07-07	2018-07-07	Brasília/DF	FARIAS, C. L. (2018). [WA3026543, Florisuga fusca (Vieillot, 1817)]. Wiki Aves - A Enciclopédia das Aves do Brasil.Disponível em: <http://www.wikiaves.com/3026543> Acesso em: 01 Abr 2020.	http://www.wikiaves.com/3026543
Florisuga_fusca	Callistemon citrinus	Legitimate	Not determined	No	Marcelo Correa	2017-08-20	2017-08-24	Belo Horizonte/MG	CORREA, M. G. (2017). [WA2671453, Florisuga fusca (Vieillot, 1817)]. Wiki Aves - A Enciclopédia das Aves do Brasil.Disponível em: <http://www.wikiaves.com/2671453> Acesso em: 01 Abr 2020.	http://www.wikiaves.com/2671453
Florisuga_fusca	Callistemon citrinus	Legitimate	Not determined	No	Márcia Giovani	2017-08-20	2017-08-20	São Lourenço/MG	PORTO, M. A. (2017). [WA2667226, Florisuga fusca (Vieillot, 1817)]. Wiki Aves - A Enciclopédia das Aves do Brasil.Disponível em: <http://www.wikiaves.com/2667226> Acesso em: 01 Abr 2020.	http://www.wikiaves.com/2667226
Florisuga_fusca	Callistemon citrinus	Legitimate	Not determined	yes	Fatima Wahast	2017-09-03	2017-09-04	Pelotas/RS	WAHAST, M. F. (2017). [WA2684458, Florisuga fusca (Vieillot, 1817)]. Wiki Aves - A Enciclopédia das Aves do Brasil.Disponível em: <http://www.wikiaves.com/2684458> Acesso em: 01 Abr 2020.	http://www.wikiaves.com/2684458
Florisuga_fusca	Callistemon citrinus	Legitimate	Not determined	yes	Ronaldo Cardoso	2016-10-09	2016-10-12	Mogi das Cruzes/SP	CARDOSO, R. S. (2016). [WA2320054, Florisuga fusca (Vieillot, 1817)]. Wiki Aves - A Enciclopédia das Aves do Brasil.Disponível em: <http://www.wikiaves.com/2320054> Acesso em: 01 Abr 2020.	http://www.wikiaves.com/2320054
Florisuga_fusca	Callistemon citrinus	Legitimate	Not determined	yes	Irlea Rodrigues keka	2016-10-08	2016-10-09	Joinville/SC	RODRIGUES, I. C. (2016). [WA2314979, Florisuga fusca (Vieillot, 1817)]. Wiki Aves - A Enciclopédia das Aves do Brasil.Disponível em: <http://www.wikiaves.com/2314979> Acesso em: 01 Abr 2020.	http://www.wikiaves.com/2314979
Florisuga_fusca	Callistemon citrinus	Legitimate	Not determined	yes	Paulo César Araújo S. Junior	2013-10-04	2017-05-07	São Roque/SP	SANTOS, P. C. (2013). [WA2550641, Florisuga fusca (Vieillot, 1817)]. Wiki Aves - A Enciclopédia das Aves do Brasil.Disponível em: <http://www.wikiaves.com/2550641> Acesso em: 01 Abr 2020.	http://www.wikiaves.com/2550641
Florisuga_fusca	Callistemon citrinus	Legitimate	Not determined	yes	Luiz Motta	2015-09-18	2016-01-03	Rio Acima/MG	MOTTA, L. G. (2015). [WA1968919, Florisuga fusca (Vieillot, 1817)]. Wiki Aves - A Enciclopédia das Aves do Brasil.Disponível em: <http://www.wikiaves.com/1968919> Acesso em: 02 Abr 2020.	http://www.wikiaves.com/1968919
Florisuga_fusca	Callistemon citrinus	Legitimate	Not determined	yes	Sonia Furtado	2015-09-11	2015-11-07	Mariana/MG	FURTADO, S. M. (2015). [WA1902159, Florisuga fusca (Vieillot, 1817)]. Wiki Aves - A Enciclopédia das Aves do Brasil.Disponível em: <http://www.wikiaves.com/1902159> Acesso em: 02 Abr 2020.	http://www.wikiaves.com/1902159
Florisuga_fusca	Callistemon citrinus	Legitimate	Not determined	yes	Alexandre Habib	2015-08-01	2015-08-02	Patos de Minas/MG	HABIB, A. S. (2015). [WA1782822, Florisuga fusca (Vieillot, 1817)]. Wiki Aves - A Enciclopédia das Aves do Brasil.Disponível em: <http://www.wikiaves.com/1782822> Acesso em: 02 Abr 2020.	http://www.wikiaves.com/1782822
Florisuga_fusca	Callistemon citrinus	Legitimate	Not determined	yes	Ademir Ferreira	2015-08-08	2015-08-10	Tapira/MG	FERREIRA, A. D. (2015). [WA1793110, Florisuga fusca (Vieillot, 1817)]. Wiki Aves - A Enciclopédia das Aves do Brasil.Disponível em: <http://www.wikiaves.com/1793110> Acesso em: 02 Abr 2020.	http://www.wikiaves.com/1793110
Florisuga_fusca	Callistemon citrinus	Legitimate	Not determined	No	Francisco Pizarro	2015-08-01	2015-08-01	Belo Horizonte/MG	PIZARRO, F. J. (2015). [WA1780718, Florisuga fusca (Vieillot, 1817)]. Wiki Aves - A Enciclopédia das Aves do Brasil.Disponível em: <http://www.wikiaves.com/1780718> Acesso em: 02 Abr 2020.	http://www.wikiaves.com/1780718
Florisuga_fusca	Callistemon citrinus	Legitimate	Not determined	yes	José Nélio Miranda	2015-07-25	2015-07-25	Alfenas/MG	JOSENELIO (2015). [WA1771395, Florisuga fusca (Vieillot, 1817)]. Wiki Aves - A Enciclopédia das Aves do Brasil.Disponível em: <http://www.wikiaves.com/1771395> Acesso em: 02 Abr 2020.	http://www.wikiaves.com/1771395
Florisuga_fusca	Callistemon citrinus	Legitimate	Not determined	yes	Lisa Vaccari	2014-08-17	2014-08-24	São Carlos/SP	VACCARI, L. (2014). [WA1429234, Florisuga fusca (Vieillot, 1817)]. Wiki Aves - A Enciclopédia das Aves do Brasil.Disponível em: <http://www.wikiaves.com/1429234> Acesso em: 02 Abr 2020.	http://www.wikiaves.com/1429234
Florisuga_fusca	Callistemon citrinus	Legitimate	Not determined	Not determined	Sabrina Fernandes Vila Nova	2013-08-09	2014-09-18	São Lourenço/MG	NOVA, S. F. (2013). [WA1455314, Florisuga fusca (Vieillot, 1817)]. Wiki Aves - A Enciclopédia das Aves do Brasil.Disponível em: <http://www.wikiaves.com/1455314> Acesso em: 02 Abr 2020.	http://www.wikiaves.com/1455314
Florisuga_fusca	Callistemon citrinus	Legitimate	Not determined	yes	Daniel Gonçalves e Bruna	2012-02-27	2013-08-27	São José do Vale do Rio Preto/RJ	GONÇALVES, D. (2012). [WA1063735, Florisuga fusca (Vieillot, 1817)]. Wiki Aves - A Enciclopédia das Aves do Brasil.Disponível em: <http://www.wikiaves.com/1063735> Acesso em: 02 Abr 2020.	http://www.wikiaves.com/1063735
Florisuga_fusca	Callistemon citrinus	Legitimate	Not determined	yes	Fabricio Basilio	2011-11-02	2011-11-06	Santo Amaro da Imperatriz/SC	ALMEIDA, F. B. (2011). [WA490530, Florisuga fusca (Vieillot, 1817)]. Wiki Aves - A Enciclopédia das Aves do Brasil.Disponível em: <http://www.wikiaves.com/490530> Acesso em: 03 Abr 2020.	http://www.wikiaves.com/490530
Florisuga_fusca	Malvaviscus (Malvaceae)	Legitimate	Not determined	Not determined	Alexandre Bretz	2012-03-02	2012-03-03	Macaé/RJ	ALEXANDREBRETZ (2012). [WA587290, Florisuga fusca (Vieillot, 1817)]. Wiki Aves - A Enciclopédia das Aves do Brasil.Disponível em: <http://www.wikiaves.com/587290> Acesso em: 03 Abr 2020.	http://www.wikiaves.com/587290
Florisuga_fusca	Spathodea campanulata P.Beauv. (Bignoniaceae)	Legitimate	Not determined	yes	Hiroshi Hattori	2012-03-23	2012-03-23	São José/SC	HATTORI, H. (2012). [WA601608, Florisuga fusca (Vieillot, 1817)]. Wiki Aves - A Enciclopédia das Aves do Brasil.Disponível em: <http://www.wikiaves.com/601608> Acesso em: 03 Abr 2020.	http://www.wikiaves.com/601608
Florisuga_fusca	Callistemon citrinus	Legitimate	Not determined	Not determined	Herculano Neto	2011-05-19	2011-05-23	Irati/PR	BATISTA, H. (2011). [WA355658, Florisuga fusca (Vieillot, 1817)]. Wiki Aves - A Enciclopédia das Aves do Brasil.Disponível em: <http://www.wikiaves.com/355658> Acesso em: 03 Abr 2020.	http://www.wikiaves.com/355658
Florisuga_fusca	Callistemon citrinus	Legitimate	Not determined	yes	Carlos Gussoni	2010-10-18	2011-05-28	Santa Teresa/ES	GUSSONI, C. O. (2010). [WA359073, Florisuga fusca (Vieillot, 1817)]. Wiki Aves - A Enciclopédia das Aves do Brasil.Disponível em: <http://www.wikiaves.com/359073> Acesso em: 03 Abr 2020.	http://www.wikiaves.com/359073
Florisuga_fusca	Callistemon citrinus	Legitimate	Not determined	yes	André Wittmann	2011-09-14	2011-09-16	Dois Irmãos/RS	WITTMANN, A. L. (2011). [WA444670, Florisuga fusca (Vieillot, 1817)]. Wiki Aves - A Enciclopédia das Aves do Brasil.Disponível em: <http://www.wikiaves.com/444670> Acesso em: 04 Abr 2020.	http://www.wikiaves.com/444670
Florisuga_fusca	Combretum fruticosum	Legitimate	Not determined	yes	Marcio Maia	2019-02-10	2019-02-11	Rio de Janeiro/RJ	MAIA, M. A. (2019). [WA3277860, Florisuga fusca (Vieillot, 1817)]. Wiki Aves - A Enciclopédia das Aves do Brasil.Disponível em: <http://www.wikiaves.com/3277860> Acesso em: 31 Mar 2020.	http://www.wikiaves.com/3277860
Florisuga_fusca	Combretum fruticosum	Legitimate	Not determined	yes	Eden Fontes	2018-10-18	2018-10-18	Rio de Janeiro/RJ	FONTES, E. C. (2018). [WA3150448, Florisuga fusca (Vieillot, 1817)]. Wiki Aves - A Enciclopédia das Aves do Brasil.Disponível em: <http://www.wikiaves.com/3150448> Acesso em: 31 Mar 2020.	http://www.wikiaves.com/3150448
Florisuga_fusca	Combretum fruticosum	Legitimate	Not determined	yes	Erika Hingst-Zaher	2018-01-27	2018-01-30	Rio de Janeiro/RJ	HINGST-ZAHER, E. (2018). [WA2867568, Florisuga fusca (Vieillot, 1817)]. Wiki Aves - A Enciclopédia das Aves do Brasil.Disponível em: <http://www.wikiaves.com/2867568> Acesso em: 01 Abr 2020.	http://www.wikiaves.com/2867568
Florisuga_fusca	Combretum fruticosum	Legitimate	Not determined	yes	Marcio Maia	2019-10-26	2019-10-27	Rio de Janeiro/RJ	MAIA, M. A. (2019). [WA3547624, Florisuga fusca (Vieillot, 1817)]. Wiki Aves - A Enciclopédia das Aves do Brasil.Disponível em: <http://www.wikiaves.com/3547624> Acesso em: 31 Mar 2020.	http://www.wikiaves.com/3547624
Florisuga_fusca	Combretum fruticosum	Legitimate	Not determined	yes	Claudio Martins	2015-10-10	2015-10-10	Rio de Janeiro/RJ	SOUZA, C. M. (2015). [WA1865489, Florisuga fusca (Vieillot, 1817)]. Wiki Aves - A Enciclopédia das Aves do Brasil.Disponível em: <http://www.wikiaves.com/1865489> Acesso em: 02 Abr 2020.	http://www.wikiaves.com/1865489
Florisuga_fusca	Combretum fruticosum	Legitimate	Not determined	yes	Erika Hingst-Zaher	2018-01-27	2018-01-30	Rio de Janeiro/RJ	HINGST-ZAHER, E. (2018). [WA2867568, Florisuga fusca (Vieillot, 1817)]. Wiki Aves - A Enciclopédia das Aves do Brasil.Disponível em: <http://www.wikiaves.com/2867568> Acesso em: 02 Abr 2020.	http://www.wikiaves.com/2867568
Florisuga_fusca	Combretum fruticosum	Legitimate	Not determined	yes	Paulo Dias	2013-01-26	2013-03-14	Rio de Janeiro/RJ	DIAS, P. V. (2013). [WA908616, Florisuga fusca (Vieillot, 1817)]. Wiki Aves - A Enciclopédia das Aves do Brasil.Disponível em: <http://www.wikiaves.com/908616> Acesso em: 03 Abr 2020.	http://www.wikiaves.com/908616
Florisuga_fusca	Combretum fruticosum	Legitimate	Not determined	yes	Flavio Pereira	2011-11-19	2011-11-21	Rio de Janeiro/RJ	PEREIRA, F. (2011). [WA503205, Florisuga fusca (Vieillot, 1817)]. Wiki Aves - A Enciclopédia das Aves do Brasil.Disponível em: <http://www.wikiaves.com/503205> Acesso em: 03 Abr 2020.	http://www.wikiaves.com/503205
Florisuga_fusca	Combretum fruticosum	Legitimate	Not determined	yes	Wellington Santos	2011-07-21	2011-07-21	Bom Despacho/MG	SANTOS, W. C. (2011). [WA399709, Florisuga fusca (Vieillot, 1817)]. Wiki Aves - A Enciclopédia das Aves do Brasil.Disponível em: <http://www.wikiaves.com/399709> Acesso em: 03 Abr 2020.	http://www.wikiaves.com/399709
Florisuga_fusca	Combretum fruticosum	Legitimate	Not determined	Not determined	Luiz Carlos de Araújo	2010-01-13	2010-01-14	Santa Teresa/ES	ARAÚJO, L. C. (2010). [WA99353, Florisuga fusca (Vieillot, 1817)]. Wiki Aves - A Enciclopédia das Aves do Brasil.Disponível em: <http://www.wikiaves.com/99353> Acesso em: 04 Abr 2020.	http://www.wikiaves.com/99353
Florisuga_fusca	Combretum fruticosum	Legitimate	Not determined	yes	Luciano Monferrari	2013-06-23	2013-06-28	Piraju/SP	MONFERRARI, L. V. (2013). [WA998664, Florisuga fusca (Vieillot, 1817)]. Wiki Aves - A Enciclopédia das Aves do Brasil.Disponível em: <http://www.wikiaves.com/998664> Acesso em: 03 Abr 2020.	http://www.wikiaves.com/998664
Florisuga_fusca	Combretum fruticosum	Legitimate	Male	yes	Valdir Hobus	2010-01-18	2010-09-08	Agrolândia/SC	HOBUS, V. (2010). [WA197888, Florisuga fusca (Vieillot, 1817)]. Wiki Aves - A Enciclopédia das Aves do Brasil.Disponível em: <http://www.wikiaves.com/197888> Acesso em: 04 Abr 2020.	http://www.wikiaves.com/197888
Florisuga_fusca	Costus spiralis	Legitimate	Not determined	yes	João Antônio De B. Vitto	2014-01-12	2014-01-18	Guaraqueçaba/PR	VITTO, J. A. (2014). [WA1220079, Florisuga fusca (Vieillot, 1817)]. Wiki Aves - A Enciclopédia das Aves do Brasil.Disponível em: <http://www.wikiaves.com/1220079> Acesso em: 02 Abr 2020.	http://www.wikiaves.com/1220079
Florisuga_fusca	Dombeya wallichii	Legitimate	Not determined	yes	Daniel Berbare	2014-07-12	2015-05-12	Rio Grande/RS	BERBARE, D. A. (2014). [WA1691408, Florisuga fusca (Vieillot, 1817)]. Wiki Aves - A Enciclopédia das Aves do Brasil.Disponível em: <http://www.wikiaves.com/1691408> Acesso em: 02 Abr 2020.	http://www.wikiaves.com/1691408
Florisuga_fusca	Dombeya wallichii	Legitimate	Not determined	yes	Daniel Berbare	2014-07-12	2014-07-12	Rio Grande/RS	BERBARE, D. A. (2014). [WA1382307, Florisuga fusca (Vieillot, 1817)]. Wiki Aves - A Enciclopédia das Aves do Brasil.Disponível em: <http://www.wikiaves.com/1382307> Acesso em: 02 Abr 2020.	http://www.wikiaves.com/1382307
Florisuga_fusca	Erythrina verna Vell.	Legitimate	Not determined	yes	Márcia Valle	2018-09-08	2018-09-08	Matias Barbosa/MG	OLIVEIRA, M. V. (2018). [WA3101403, Florisuga fusca (Vieillot, 1817)]. Wiki Aves - A Enciclopédia das Aves do Brasil.Disponível em: <http://www.wikiaves.com/3101403> Acesso em: 31 Mar 2020.	http://www.wikiaves.com/3101403
Florisuga_fusca	Erythrina velutina Willd.	Legitimate	Not determined	yes	Marcelo Monteiro	2017-07-23	2017-11-08	Brasília/DF	MONTEIRO, M. P. (2017). [WA2771484, Florisuga fusca (Vieillot, 1817)]. Wiki Aves - A Enciclopédia das Aves do Brasil.Disponível em: <http://www.wikiaves.com/2771484> Acesso em: 01 Abr 2020.	http://www.wikiaves.com/2771484
Florisuga_fusca	Erythrina velutina Willd.	Legitimate	Not determined	yes	Marcio Brito Rocha	2017-07-21	2017-08-08	Brasília/DF	BRITO, M. (2017). [WA2652273, Florisuga fusca (Vieillot, 1817)]. Wiki Aves - A Enciclopédia das Aves do Brasil.Disponível em: <http://www.wikiaves.com/2652273> Acesso em: 01 Abr 2020.	http://www.wikiaves.com/2652273
Florisuga_fusca	Erythrina velutina Willd.	Legitimate	Not determined	yes	Márcio Rojas	2017-07-25	2017-07-26	Márcio Rojas	CRUZ, M. R. (2017). [WA2635462, Florisuga fusca (Vieillot, 1817)]. Wiki Aves - A Enciclopédia das Aves do Brasil.Disponível em: <http://www.wikiaves.com/2635462> Acesso em: 01 Abr 2020.	http://www.wikiaves.com/2635462
Florisuga_fusca	Erythrina velutina Willd.	Legitimate	Not determined	yes	Herbert O. R. Schubart	2015-08-14	2015-08-23	Brasília/DF	SCHUBART, H. O. (2015). [WA1808228, Florisuga fusca (Vieillot, 1817)]. Wiki Aves - A Enciclopédia das Aves do Brasil.Disponível em: <http://www.wikiaves.com/1808228> Acesso em: 02 Abr 2020.	http://www.wikiaves.com/1808228
Florisuga_fusca	Erythrina velutina Willd.	Legitimate	Not determined	yes	Ricardo F. Garcia	2012-08-11	2012-08-13	Brasília/DF	GARCIA, R. F. (2012). [WA714768, Florisuga fusca (Vieillot, 1817)]. Wiki Aves - A Enciclopédia das Aves do Brasil.Disponível em: <http://www.wikiaves.com/714768> Acesso em: 03 Abr 2020.	http://www.wikiaves.com/714768
Florisuga_fusca	Erythrina speciosa	Legitimate	Not determined	yes	Thales Castilhos de Freitas	2018-09-09	2019-03-21	Morro Redondo/RS	FREITAS, T. C. (2018). [WA3310377, Florisuga fusca (Vieillot, 1817)]. Wiki Aves - A Enciclopédia das Aves do Brasil.Disponível em: <http://www.wikiaves.com/3310377> Acesso em: 31 Mar 2020.	http://www.wikiaves.com/3310377
Florisuga_fusca	Erythrina speciosa	Legitimate	Not determined	yes	Maiara Vissoto	2017-07-01	2017-07-02	Capão do Leão/RS	VISSOTO, M. (2017). [WA2608342, Florisuga fusca (Vieillot, 1817)]. Wiki Aves - A Enciclopédia das Aves do Brasil.Disponível em: <http://www.wikiaves.com/2608342> Acesso em: 01 Abr 2020.	http://www.wikiaves.com/2608342
Florisuga_fusca	Erythrina speciosa	Legitimate	Not determined	yes	Rafael Antunes Dias	2015-08-13	2016-01-08	Capão do Leão/RS	DIAS, R. A. (2015). [WA1976611, Florisuga fusca (Vieillot, 1817)]. Wiki Aves - A Enciclopédia das Aves do Brasil.Disponível em: <http://www.wikiaves.com/1976611> Acesso em: 02 Abr 2020.	http://www.wikiaves.com/1976611
Florisuga_fusca	Erythrina speciosa	Legitimate	Not determined	No	Roberto Dall Agnol	2014-09-20	2014-09-22	Sinimbu/RS	AGNOL, R. L. (2014). [WA1460274, Florisuga fusca (Vieillot, 1817)]. Wiki Aves - A Enciclopédia das Aves do Brasil.Disponível em: <http://www.wikiaves.com/1460274> Acesso em: 02 Abr 2020.	http://www.wikiaves.com/1460274
Florisuga_fusca	Erythrina speciosa	Legitimate	Not determined	Not determined	Jaim Oliveira	2011-08-12	2011-09-02	Porto Alegre/RS	OLIVEIRA, J. S. (2011). [WA429750, Florisuga fusca (Vieillot, 1817)]. Wiki Aves - A Enciclopédia das Aves do Brasil.Disponível em: <http://www.wikiaves.com/429750> Acesso em: 04 Abr 2020.	http://www.wikiaves.com/429750
Florisuga_fusca	Etlingera elatior	Legitimate	Not determined	yes	Eduardo Fernandes 2	2014-10-17	2014-10-30	Ubatuba/SP	FERNANDES, E. (2014). [WA1498514, Florisuga fusca (Vieillot, 1817)]. Wiki Aves - A Enciclopédia das Aves do Brasil.Disponível em: <http://www.wikiaves.com/1498514> Acesso em: 02 Abr 2020.	http://www.wikiaves.com/1498514
Florisuga_fusca	Etlingera elatior	Legitimate	Not determined	yes	Marcos Boffo	2008-01-23	2013-10-31	Ubatuba/SP	BOFFO, M. A. (2008). [WA1138251, Florisuga fusca (Vieillot, 1817)]. Wiki Aves - A Enciclopédia das Aves do Brasil.Disponível em: <http://www.wikiaves.com/1138251> Acesso em: 03 Abr 2020.	http://www.wikiaves.com/1138251
Florisuga_fusca	Etlingera elatior	Legitimate	Not determined	yes	Evandro Santos	2008-07-04	2009-10-18	Ubatuba/SP	SANTOS, E. M. (2008). [WA69693, Florisuga fusca (Vieillot, 1817)]. Wiki Aves - A Enciclopédia das Aves do Brasil.Disponível em: <http://www.wikiaves.com/69693> Acesso em: 04 Abr 2020.	http://www.wikiaves.com/69693
Florisuga_fusca	Grevillea banksii	Legitimate	Not determined	yes	Gilvan Moreira	2019-11-15	2019-12-18	Itacaré/BA	SANTOS, G. M. (2019). [WA3612405, Florisuga fusca (Vieillot, 1817)]. Wiki Aves - A Enciclopédia das Aves do Brasil.Disponível em: <http://www.wikiaves.com/3612405> Acesso em: 31 Mar 2020.	http://www.wikiaves.com/3612405
Florisuga_fusca	Grevillea banksii	Legitimate	Not determined	yes	Daniel Alfenas	2020-02-16	2020-02-18	Itacaré/BA	ALFENAS, D. A. (2020). [WA3690775, Florisuga fusca (Vieillot, 1817)]. Wiki Aves - A Enciclopédia das Aves do Brasil.Disponível em: <http://www.wikiaves.com/3690775> Acesso em: 31 Mar 2020.	http://www.wikiaves.com/3690775
Florisuga_fusca	Grevillea banksii	Legitimate	Not determined	yes	Heber Pires	2019-01-19	2019-08-09	Nova Friburgo/RJ	PIRES, H. (2019). [WA3449190, Florisuga fusca (Vieillot, 1817)]. Wiki Aves - A Enciclopédia das Aves do Brasil.Disponível em: <http://www.wikiaves.com/3449190> Acesso em: 31 Mar 2020.	http://www.wikiaves.com/3449190
Florisuga_fusca	Grevillea banksii	Legitimate	Not determined	yes	Marquinho Campos	2016-09-18	2019-07-27	Nova Trento/SC	CAMPOS, M. (2016). [WA3433979, Florisuga fusca (Vieillot, 1817)]. Wiki Aves - A Enciclopédia das Aves do Brasil.Disponível em: <http://www.wikiaves.com/3433979> Acesso em: 31 Mar 2020.	http://www.wikiaves.com/3433979
Florisuga_fusca	Grevillea banksii	Legitimate	Not determined	yes	Miguel B. Lima	2020-01-01	2020-01-09	Guaratuba/PR	LIMA, M. B. (2020). [WA3637868, Florisuga fusca (Vieillot, 1817)]. Wiki Aves - A Enciclopédia das Aves do Brasil.Disponível em: <http://www.wikiaves.com/3637868> Acesso em: 31 Mar 2020.	http://www.wikiaves.com/3637868
Florisuga_fusca	Grevillea banksii	Legitimate	Not determined	yes	Gersony Jovchelevich	2018-03-24	2018-09-20	Botucatu/SP	JOVCHELEVICH, G. (2018). [WA3116432, Florisuga fusca (Vieillot, 1817)]. Wiki Aves - A Enciclopédia das Aves do Brasil.Disponível em: <http://www.wikiaves.com/3116432> Acesso em: 31 Mar 2020.	http://www.wikiaves.com/3116432
Florisuga_fusca	Grevillea banksii	Legitimate	Not determined	yes	Fabio-Mi-Randazzo	2018-04-07	2018-04-10	São Miguel Arcanjo/SP	RANDAZZO, F. (2018). [WA2936882, Florisuga fusca (Vieillot, 1817)]. Wiki Aves - A Enciclopédia das Aves do Brasil.Disponível em: <http://www.wikiaves.com/2936882> Acesso em: 01 Abr 2020.	http://www.wikiaves.com/2936882
Florisuga_fusca	Grevillea banksii	Legitimate	Not determined	yes	Marcos Moura	2018-02-12	2018-02-12	Paraibuna/SP	MOURA, M. (2018). [WA2880776, Florisuga fusca (Vieillot, 1817)]. Wiki Aves - A Enciclopédia das Aves do Brasil.Disponível em: <http://www.wikiaves.com/2880776> Acesso em: 01 Abr 2020.	http://www.wikiaves.com/2880776
Florisuga_fusca	Grevillea banksii	Legitimate	Not determined	Not determined	Cristiane Albino	2017-09-29	2019-08-13	Angatuba/SP	ALBINO, C. V. (2017). [WA3453949, Florisuga fusca (Vieillot, 1817)]. Wiki Aves - A Enciclopédia das Aves do Brasil.Disponível em: <http://www.wikiaves.com/3453949> Acesso em: 31 Mar 2020.	http://www.wikiaves.com/3453949
Florisuga_fusca	Grevillea banksii	Legitimate	Not determined	yes	Leonardo Merçon	2017-12-30	2018-01-11	Divino de São Lourenço/ES	MERÇON, L. (2017). [WA2843623, Florisuga fusca (Vieillot, 1817)]. Wiki Aves - A Enciclopédia das Aves do Brasil.Disponível em: <http://www.wikiaves.com/2843623> Acesso em: 01 Abr 2020.	http://www.wikiaves.com/2843623
Florisuga_fusca	Grevillea banksii	Legitimate	Not determined	yes	Larissa Salla	2017-12-16	2017-12-18	Piedade/SP	SALLA, L. M. (2017). [WA2818328, Florisuga fusca (Vieillot, 1817)]. Wiki Aves - A Enciclopédia das Aves do Brasil.Disponível em: <http://www.wikiaves.com/2818328> Acesso em: 01 Abr 2020	http://www.wikiaves.com/2818328
Florisuga_fusca	Grevillea banksii	Legitimate	Not determined	yes	Carlos Magno Dias	2017-11-05	2017-11-05	Vargem Alta/ES	DIAS, C. M. (2017). [WA2767172, Florisuga fusca (Vieillot, 1817)]. Wiki Aves - A Enciclopédia das Aves do Brasil.Disponível em: <http://www.wikiaves.com/2767172> Acesso em: 01 Abr 2020.	http://www.wikiaves.com/2767172
Florisuga_fusca	Grevillea banksii	Legitimate	Not determined	yes	Francisco T. Tatit	2017-02-21	2017-06-19	São Miguel Arcanjo/SP	TATIT, F. T. (2017). [WA2595068, Florisuga fusca (Vieillot, 1817)]. Wiki Aves - A Enciclopédia das Aves do Brasil.Disponível em: <http://www.wikiaves.com/2595068> Acesso em: 01 Abr 2020.	http://www.wikiaves.com/2595068
Florisuga_fusca	Grevillea banksii	Legitimate	Not determined	No	Wilson Mallmann	2016-04-17	2016-06-20	Monte Alegre do Sul/SP	MALLMANN, W. (2016). [WA2163181, Florisuga fusca (Vieillot, 1817)]. Wiki Aves - A Enciclopédia das Aves do Brasil.Disponível em: <http://www.wikiaves.com/2163181> Acesso em: 01 Abr 2020.	http://www.wikiaves.com/2163181
Florisuga_fusca	Grevillea banksii	Legitimate	Not determined	yes	Flávio Sousa	2016-09-13	2016-09-29	Santa Cruz Cabrália/BA	SOUSA, F. T. (2016). [WA2301720, Florisuga fusca (Vieillot, 1817)]. Wiki Aves - A Enciclopédia das Aves do Brasil.Disponível em: <http://www.wikiaves.com/2301720> Acesso em: 01 Abr 2020.	http://www.wikiaves.com/2301720
Florisuga_fusca	Grevillea banksii	Legitimate	Not determined	yes	Rodolfo Freitas	2016-11-12	2016-11-17	Manhumirim/MG	FREITAS, R. S. (2016). [WA2369781, Florisuga fusca (Vieillot, 1817)]. Wiki Aves - A Enciclopédia das Aves do Brasil.Disponível em: <http://www.wikiaves.com/2369781> Acesso em: 01 Abr 2020.	http://www.wikiaves.com/2369781
Florisuga_fusca	Grevillea banksii	Legitimate	Not determined	yes	Leonardo Merçon	2017-12-30	2018-01-11	Divino de São Lourenço/ES	MERÇON, L. (2017). [WA2843623, Florisuga fusca (Vieillot, 1817)]. Wiki Aves - A Enciclopédia das Aves do Brasil.Disponível em: <http://www.wikiaves.com/2843623> Acesso em: 02 Abr 2020.	http://www.wikiaves.com/2843623
Florisuga_fusca	Grevillea banksii	Legitimate	Not determined	yes	Ivan Cesar	2016-10-22	2016-10-24	Santa Maria Madalena/RJ	CESAR, I. F. (2016). [WA2337016, Florisuga fusca (Vieillot, 1817)]. Wiki Aves - A Enciclopédia das Aves do Brasil.Disponível em: <http://www.wikiaves.com/2337016> Acesso em: 01 Abr 2020.	http://www.wikiaves.com/2337016
Florisuga_fusca	Grevillea banksii	Legitimate	Not determined	yes	Marcos Moura	2018-02-12	2018-02-12	Paraibuna/SP	MOURA, M. (2018). [WA2880776, Florisuga fusca (Vieillot, 1817)]. Wiki Aves - A Enciclopédia das Aves do Brasil.Disponível em: <http://www.wikiaves.com/2880776> Acesso em: 02 Abr 2020.	http://www.wikiaves.com/2880776
Florisuga_fusca	Grevillea banksii	Legitimate	Not determined	yes	Cristiane Bolochio	2016-04-27	2016-05-09	Guarulhos/SP	BOLOCHIO, C. E. (2016). [WA2112715, Florisuga fusca (Vieillot, 1817)]. Wiki Aves - A Enciclopédia das Aves do Brasil.Disponível em: <http://www.wikiaves.com/2112715> Acesso em: 02 Abr 2020.	http://www.wikiaves.com/2112715
Florisuga_fusca	Grevillea banksii	Legitimate	Not determined	yes	Heberty Adorno	2018-09-09	2018-09-10	Poções/BA	ADORNO, H. L. (2018). [WA3103258, Florisuga fusca (Vieillot, 1817)]. Wiki Aves - A Enciclopédia das Aves do Brasil.Disponível em: <http://www.wikiaves.com/3103258> Acesso em: 01 Abr 2020.	http://www.wikiaves.com/3103258
Florisuga_fusca	Grevillea banksii	Legitimate	Not determined	yes	Luiz Kagiyama	2013-11-24	2015-12-21	São Luiz do Paraitinga/SP	FILHO, L. M. (2013). [WA1953510, Florisuga fusca (Vieillot, 1817)]. Wiki Aves - A Enciclopédia das Aves do Brasil.Disponível em: <http://www.wikiaves.com/1953510> Acesso em: 02 Abr 2020.	http://www.wikiaves.com/1953510
Florisuga_fusca	Grevillea banksii	Legitimate	Not determined	Not determined	Larissa Salla	2017-12-16	2017-12-18	Piedade/SP	SALLA, L. M. (2017). [WA2818328, Florisuga fusca (Vieillot, 1817)]. Wiki Aves - A Enciclopédia das Aves do Brasil.Disponível em: <http://www.wikiaves.com/2818328> Acesso em: 02 Abr 2020.	http://www.wikiaves.com/2818328
Florisuga_fusca	Grevillea banksii	Legitimate	Not determined	yes	Gustavo Araujo	2015-03-21	2015-03-24	Manhumirim/MG	ARAUJO, G. O. (2015). [WA1644932, Florisuga fusca (Vieillot, 1817)]. Wiki Aves - A Enciclopédia das Aves do Brasil.Disponível em: <http://www.wikiaves.com/1644932> Acesso em: 02 Abr 2020.	http://www.wikiaves.com/1644932
Florisuga_fusca	Grevillea banksii	Legitimate	Not determined	yes	Marcelo Alievi	2015-02-09	2015-02-17	Santo Amaro da Imperatriz/SC	ALIEVI, M. M. (2015). [WA1613584, Florisuga fusca (Vieillot, 1817)]. Wiki Aves - A Enciclopédia das Aves do Brasil.Disponível em: <http://www.wikiaves.com/1613584> Acesso em: 02 Abr 2020.	http://www.wikiaves.com/1613584
Florisuga_fusca	Grevillea banksii	Legitimate	Not determined	yes	Eduardo Augusto Ferreira	2014-12-13	2014-12-24	Santo Antônio do Pinhal/SP	FERREIRA, E. A. (2014). [WA1556565, Florisuga fusca (Vieillot, 1817)]. Wiki Aves - A Enciclopédia das Aves do Brasil.Disponível em: <http://www.wikiaves.com/1556565> Acesso em: 02 Abr 2020.	http://www.wikiaves.com/1556565
Florisuga_fusca	Grevillea banksii	Legitimate	Not determined	yes	Eduardo Rodrigues	2016-01-09	2016-01-10	Nova Trento/SC	RODRIGUES, E. S. (2016). [WA1978754, Florisuga fusca (Vieillot, 1817)]. Wiki Aves - A Enciclopédia das Aves do Brasil.Disponível em: <http://www.wikiaves.com/1978754> Acesso em: 02 Abr 2020.	http://www.wikiaves.com/1978754
Florisuga_fusca	Grevillea banksii	Legitimate	Not determined	yes	Marco O. Campos	2013-12-15	2013-12-16	Santa Maria Madalena/RJ	MARCAMPOS1 (2013). [WA1185928, Florisuga fusca (Vieillot, 1817)]. Wiki Aves - A Enciclopédia das Aves do Brasil.Disponível em: <http://www.wikiaves.com/1185928> Acesso em: 02 Abr 2020.	http://www.wikiaves.com/1185928
Florisuga_fusca	Grevillea banksii	Legitimate	Not determined	yes	Richard Stubing	2013-11-15	2013-11-15	Itatiba/SP	STÜBING, R. E. (2013). [WA1154204, Florisuga fusca (Vieillot, 1817)]. Wiki Aves - A Enciclopédia das Aves do Brasil.Disponível em: <http://www.wikiaves.com/1154204> Acesso em: 02 Abr 2020.	http://www.wikiaves.com/1154204
Florisuga_fusca	Grevillea banksii	Legitimate	Not determined	Not determined	Gustavo Dias	2011-04-04	2012-07-13	Ilhabela/SP	DIAS, G. (2011). [WA687257, Florisuga fusca (Vieillot, 1817)]. Wiki Aves - A Enciclopédia das Aves do Brasil.Disponível em: <http://www.wikiaves.com/687257> Acesso em: 03 Abr 2020.	http://www.wikiaves.com/687257
[truncated: 1,965 more rows]
