# Supplementary material
Source: Elsevier journal article supplement (https://www.sciencedirect.com/science/article/pii/S2530064423000238)
Supplement: mmc2 [file S2530064423000238:mmc2.xlsx]

## Sheet: Planilha1
Latitude	Longitude	State	Locality	Biome	Reference
-7.8748	-36.403	PE	Santa Cruz do Capibaribe	Caatinga	Dalsgaard, B., et al., 2021. The influence of biogeographical and evolutionary histories on morphological trait‐matching and resource specialization in mutualistic hummingbird–plant networks. Funct. Ecol. 35, 1120–1133. https://doi.org/10.1111/1365-2435.13784
-11.48	-41.32	BA	Morro do Chapéu	Caatinga	Dalsgaard, B., et al., 2021. The influence of biogeographical and evolutionary histories on morphological trait‐matching and resource specialization in mutualistic hummingbird–plant networks. Funct. Ecol. 35, 1120–1133. https://doi.org/10.1111/1365-2435.13785
-12.98	-41.33	BA	Mucugê	Caatinga	Dalsgaard, B., et al., 2021. The influence of biogeographical and evolutionary histories on morphological trait‐matching and resource specialization in mutualistic hummingbird–plant networks. Funct. Ecol. 35, 1120–1133. https://doi.org/10.1111/1365-2435.13786
-13.12	-41.58	BA	Mucugê	Caatinga	Dalsgaard, B., et al., 2021. The influence of biogeographical and evolutionary histories on morphological trait‐matching and resource specialization in mutualistic hummingbird–plant networks. Funct. Ecol. 35, 1120–1133. https://doi.org/10.1111/1365-2435.13787
-13.12	-41.57	BA	Mucugê	Caatinga	Dalsgaard, B., et al., 2021. The influence of biogeographical and evolutionary histories on morphological trait‐matching and resource specialization in mutualistic hummingbird–plant networks. Funct. Ecol. 35, 1120–1133. https://doi.org/10.1111/1365-2435.13788
-13.8119	-39.2039	BA	Igrapiúna	Atlantic Forest	Dalsgaard, B., et al., 2021. The influence of biogeographical and evolutionary histories on morphological trait‐matching and resource specialization in mutualistic hummingbird–plant networks. Funct. Ecol. 35, 1120–1133. https://doi.org/10.1111/1365-2435.13789
-17.7778	-48.6794	GO	Caldas Novas	Cerrado	Dalsgaard, B., et al., 2021. The influence of biogeographical and evolutionary histories on morphological trait‐matching and resource specialization in mutualistic hummingbird–plant networks. Funct. Ecol. 35, 1120–1133. https://doi.org/10.1111/1365-2435.13790
-18.1967	-43.5691	MG	Diamantina	Cerrado	Dalsgaard, B., et al., 2021. The influence of biogeographical and evolutionary histories on morphological trait‐matching and resource specialization in mutualistic hummingbird–plant networks. Funct. Ecol. 35, 1120–1133. https://doi.org/10.1111/1365-2435.13791
-18.9892	-48.302	MG	Uberlândia	Cerrado	Dalsgaard, B., et al., 2021. The influence of biogeographical and evolutionary histories on morphological trait‐matching and resource specialization in mutualistic hummingbird–plant networks. Funct. Ecol. 35, 1120–1133. https://doi.org/10.1111/1365-2435.13792
-19.1556	-48.3889	MG	Uberlândia	Cerrado	Dalsgaard, B., et al., 2021. The influence of biogeographical and evolutionary histories on morphological trait‐matching and resource specialization in mutualistic hummingbird–plant networks. Funct. Ecol. 35, 1120–1133. https://doi.org/10.1111/1365-2435.13793
-19.25	-43.52	MG	Serra do cipó	Rupestrian Fields	Dalsgaard, B., et al., 2021. The influence of biogeographical and evolutionary histories on morphological trait‐matching and resource specialization in mutualistic hummingbird–plant networks. Funct. Ecol. 35, 1120–1133. https://doi.org/10.1111/1365-2435.13794
-19.5167	-56.983	MS	Corumbá	Pantanal	Dalsgaard, B., et al., 2021. The influence of biogeographical and evolutionary histories on morphological trait‐matching and resource specialization in mutualistic hummingbird–plant networks. Funct. Ecol. 35, 1120–1133. https://doi.org/10.1111/1365-2435.13795
-19.95	-43.9	MG	Belo Horizonte	Cerrado	Dalsgaard, B., et al., 2021. The influence of biogeographical and evolutionary histories on morphological trait‐matching and resource specialization in mutualistic hummingbird–plant networks. Funct. Ecol. 35, 1120–1133. https://doi.org/10.1111/1365-2435.13796
-20.4428	-54.6464	MS	Campo Grande	Cerrado	Dalsgaard, B., et al., 2021. The influence of biogeographical and evolutionary histories on morphological trait‐matching and resource specialization in mutualistic hummingbird–plant networks. Funct. Ecol. 35, 1120–1133. https://doi.org/10.1111/1365-2435.13797
-20.509	-54.6167	MS	Campo Grande	Cerrado	Dalsgaard, B., et al., 2021. The influence of biogeographical and evolutionary histories on morphological trait‐matching and resource specialization in mutualistic hummingbird–plant networks. Funct. Ecol. 35, 1120–1133. https://doi.org/10.1111/1365-2435.13798
-20.75	-42.92	MG	Viçosa	Cerrado	Dalsgaard, B., et al., 2021. The influence of biogeographical and evolutionary histories on morphological trait‐matching and resource specialization in mutualistic hummingbird–plant networks. Funct. Ecol. 35, 1120–1133. https://doi.org/10.1111/1365-2435.13799
-21.6156	-47.8147	SP	Luís Antônio	Atlantic Forest	Dalsgaard, B., et al., 2021. The influence of biogeographical and evolutionary histories on morphological trait‐matching and resource specialization in mutualistic hummingbird–plant networks. Funct. Ecol. 35, 1120–1133. https://doi.org/10.1111/1365-2435.13800
-22.2781	-41.6614	RJ	Carapebus	Atlantic Forest	Dalsgaard, B., et al., 2021. The influence of biogeographical and evolutionary histories on morphological trait‐matching and resource specialization in mutualistic hummingbird–plant networks. Funct. Ecol. 35, 1120–1133. https://doi.org/10.1111/1365-2435.13801
-22.5	-44.8333	SP	Queluz	Atlantic Forest	Dalsgaard, B., et al., 2021. The influence of biogeographical and evolutionary histories on morphological trait‐matching and resource specialization in mutualistic hummingbird–plant networks. Funct. Ecol. 35, 1120–1133. https://doi.org/10.1111/1365-2435.13802
-22.73	-45.58	SP	Campos do Jordão	Atlantic Forest	Dalsgaard, B., et al., 2021. The influence of biogeographical and evolutionary histories on morphological trait‐matching and resource specialization in mutualistic hummingbird–plant networks. Funct. Ecol. 35, 1120–1133. https://doi.org/10.1111/1365-2435.13803
-23.17	-44.92	SP	Cunha	Atlantic Forest	Dalsgaard, B., et al., 2021. The influence of biogeographical and evolutionary histories on morphological trait‐matching and resource specialization in mutualistic hummingbird–plant networks. Funct. Ecol. 35, 1120–1133. https://doi.org/10.1111/1365-2435.13804
-23.283	-45.05	SP	Cunha	Atlantic Forest	Dalsgaard, B., et al., 2021. The influence of biogeographical and evolutionary histories on morphological trait‐matching and resource specialization in mutualistic hummingbird–plant networks. Funct. Ecol. 35, 1120–1133. https://doi.org/10.1111/1365-2435.13805
-23.32	-44.94	SP	Ubatuba	Atlantic Forest	Dalsgaard, B., et al., 2021. The influence of biogeographical and evolutionary histories on morphological trait‐matching and resource specialization in mutualistic hummingbird–plant networks. Funct. Ecol. 35, 1120–1133. https://doi.org/10.1111/1365-2435.13806
-23.33	-44.83	SP	Ubatuba	Atlantic Forest	Dalsgaard, B., et al., 2021. The influence of biogeographical and evolutionary histories on morphological trait‐matching and resource specialization in mutualistic hummingbird–plant networks. Funct. Ecol. 35, 1120–1133. https://doi.org/10.1111/1365-2435.13807
-23.35	-44.83	SP	Ubatuba	Atlantic Forest	Dalsgaard, B., et al., 2021. The influence of biogeographical and evolutionary histories on morphological trait‐matching and resource specialization in mutualistic hummingbird–plant networks. Funct. Ecol. 35, 1120–1133. https://doi.org/10.1111/1365-2435.13808
-23.36	-44.85	SP	Ubatuba	Atlantic Forest	Dalsgaard, B., et al., 2021. The influence of biogeographical and evolutionary histories on morphological trait‐matching and resource specialization in mutualistic hummingbird–plant networks. Funct. Ecol. 35, 1120–1133. https://doi.org/10.1111/1365-2435.13809
-23.58	-45.33	SP	Caraguatatuba	Atlantic Forest	Dalsgaard, B., et al., 2021. The influence of biogeographical and evolutionary histories on morphological trait‐matching and resource specialization in mutualistic hummingbird–plant networks. Funct. Ecol. 35, 1120–1133. https://doi.org/10.1111/1365-2435.13810
-23.63	-45.85	SP	Salesópolis	Atlantic Forest	Dalsgaard, B., et al., 2021. The influence of biogeographical and evolutionary histories on morphological trait‐matching and resource specialization in mutualistic hummingbird–plant networks. Funct. Ecol. 35, 1120–1133. https://doi.org/10.1111/1365-2435.13811
-24.18	-47.9329	SP	Sete Barras	Atlantic Forest	Dalsgaard, B., et al., 2021. The influence of biogeographical and evolutionary histories on morphological trait‐matching and resource specialization in mutualistic hummingbird–plant networks. Funct. Ecol. 35, 1120–1133. https://doi.org/10.1111/1365-2435.13812
-24.555	-47.227	SP	Iguape	Atlantic Forest	Dalsgaard, B., et al., 2021. The influence of biogeographical and evolutionary histories on morphological trait‐matching and resource specialization in mutualistic hummingbird–plant networks. Funct. Ecol. 35, 1120–1133. https://doi.org/10.1111/1365-2435.13813
-25.315	-48.6959	PR	Antonina	Atlantic Forest	Dalsgaard, B., et al., 2021. The influence of biogeographical and evolutionary histories on morphological trait‐matching and resource specialization in mutualistic hummingbird–plant networks. Funct. Ecol. 35, 1120–1133. https://doi.org/10.1111/1365-2435.13814
-27.25	-49	SC	São Caetano	Atlantic Forest	Dalsgaard, B., et al., 2021. The influence of biogeographical and evolutionary histories on morphological trait‐matching and resource specialization in mutualistic hummingbird–plant networks. Funct. Ecol. 35, 1120–1133. https://doi.org/10.1111/1365-2435.13815
-27.25	-49	SC	São Caetano	Atlantic Forest	Dalsgaard, B., et al., 2021. The influence of biogeographical and evolutionary histories on morphological trait‐matching and resource specialization in mutualistic hummingbird–plant networks. Funct. Ecol. 35, 1120–1133. https://doi.org/10.1111/1365-2435.13816
-27.25	-49	SC	São Caetano	Atlantic Forest	Dalsgaard, B., et al., 2021. The influence of biogeographical and evolutionary histories on morphological trait‐matching and resource specialization in mutualistic hummingbird–plant networks. Funct. Ecol. 35, 1120–1133. https://doi.org/10.1111/1365-2435.13817
-31.8	-52.42	RS	Capão do Leão	Pampas	Dalsgaard, B., et al., 2021. The influence of biogeographical and evolutionary histories on morphological trait‐matching and resource specialization in mutualistic hummingbird–plant networks. Funct. Ecol. 35, 1120–1133. https://doi.org/10.1111/1365-2435.13818
-20.75	-42.92	MG	Viçosa	Cerrado	Araujo, A.C., et al., 2018. Spatial distance and climate determine modularity in a cross-biomes plant–hummingbird interaction network in Brazil. J. Biogeogr. 45, 1846–1858. https://doi.org/10.1111/jbi.13367
-23.35	-44.85	SP	Ubatuba	Atlantic Forest	Araujo, A.C., et al., 2018. Spatial distance and climate determine modularity in a cross-biomes plant–hummingbird interaction network in Brazil. J. Biogeogr. 45, 1846–1858. https://doi.org/10.1111/jbi.13368
-31.8	-52.42	RS	Capão do Leão	Pampas	Araujo, A.C., et al., 2018. Spatial distance and climate determine modularity in a cross-biomes plant–hummingbird interaction network in Brazil. J. Biogeogr. 45, 1846–1858. https://doi.org/10.1111/jbi.13369
-23.28	-45.05	SP	Cunha	Atlantic Forest	Araujo, A.C., et al., 2018. Spatial distance and climate determine modularity in a cross-biomes plant–hummingbird interaction network in Brazil. J. Biogeogr. 45, 1846–1858. https://doi.org/10.1111/jbi.13370
-22.5	-44.833	RJ	Queluz	Atlantic Forest	Araujo, A.C., et al., 2018. Spatial distance and climate determine modularity in a cross-biomes plant–hummingbird interaction network in Brazil. J. Biogeogr. 45, 1846–1858. https://doi.org/10.1111/jbi.13371
-13.812	-39.204	BA	Igrapiúna	Atlantic Forest	Araujo, A.C., et al., 2018. Spatial distance and climate determine modularity in a cross-biomes plant–hummingbird interaction network in Brazil. J. Biogeogr. 45, 1846–1858. https://doi.org/10.1111/jbi.13372
-24.555	-47.227	SP	Igrapiúna	Atlantic Forest	Araujo, A.C., et al., 2018. Spatial distance and climate determine modularity in a cross-biomes plant–hummingbird interaction network in Brazil. J. Biogeogr. 45, 1846–1858. https://doi.org/10.1111/jbi.13373
-27.269	-49.014	SC	Nova Trento	Atlantic Forest	Araujo, A.C., et al., 2018. Spatial distance and climate determine modularity in a cross-biomes plant–hummingbird interaction network in Brazil. J. Biogeogr. 45, 1846–1858. https://doi.org/10.1111/jbi.13374
-27.26	-49.016	SC	Nova Trento	Atlantic Forest	Araujo, A.C., et al., 2018. Spatial distance and climate determine modularity in a cross-biomes plant–hummingbird interaction network in Brazil. J. Biogeogr. 45, 1846–1858. https://doi.org/10.1111/jbi.13375
-27.257	-49.023	SC	Botuverá	Atlantic Forest	Araujo, A.C., et al., 2018. Spatial distance and climate determine modularity in a cross-biomes plant–hummingbird interaction network in Brazil. J. Biogeogr. 45, 1846–1858. https://doi.org/10.1111/jbi.13376
-8.013	-35.182	PE	São Lourenço da Mata	Atlantic Forest	Araujo, A.C., et al., 2018. Spatial distance and climate determine modularity in a cross-biomes plant–hummingbird interaction network in Brazil. J. Biogeogr. 45, 1846–1858. https://doi.org/10.1111/jbi.13377
-23.322	-44.944	SP	Ubatuba	Atlantic Forest	Araujo, A.C., et al., 2018. Spatial distance and climate determine modularity in a cross-biomes plant–hummingbird interaction network in Brazil. J. Biogeogr. 45, 1846–1858. https://doi.org/10.1111/jbi.13378
-23.33	-44.825	SP	Ubatuba	Atlantic Forest	Araujo, A.C., et al., 2018. Spatial distance and climate determine modularity in a cross-biomes plant–hummingbird interaction network in Brazil. J. Biogeogr. 45, 1846–1858. https://doi.org/10.1111/jbi.13379
-24.118	-47.951	SP	São Miguel Arcanjo	Atlantic Forest	Araujo, A.C., et al., 2018. Spatial distance and climate determine modularity in a cross-biomes plant–hummingbird interaction network in Brazil. J. Biogeogr. 45, 1846–1858. https://doi.org/10.1111/jbi.13380
-22.73	-45.58	SP	Campos do Jordão	Atlantic Forest	Araujo, A.C., et al., 2018. Spatial distance and climate determine modularity in a cross-biomes plant–hummingbird interaction network in Brazil. J. Biogeogr. 45, 1846–1858. https://doi.org/10.1111/jbi.13381
-20.6	-56.65	MS	Bodoquena	Cerrado	Araujo, A.C., et al., 2018. Spatial distance and climate determine modularity in a cross-biomes plant–hummingbird interaction network in Brazil. J. Biogeogr. 45, 1846–1858. https://doi.org/10.1111/jbi.13382
-20.667	-56.767	MS	Bodoquena	Cerrado	Araujo, A.C., et al., 2018. Spatial distance and climate determine modularity in a cross-biomes plant–hummingbird interaction network in Brazil. J. Biogeogr. 45, 1846–1858. https://doi.org/10.1111/jbi.13383
-20.683	-56.783	MS	Bodoquena	Atlantic Forest	Araujo, A.C., et al., 2018. Spatial distance and climate determine modularity in a cross-biomes plant–hummingbird interaction network in Brazil. J. Biogeogr. 45, 1846–1858. https://doi.org/10.1111/jbi.13384
-20.517	-54.568	MS	Campo Grande	Cerrado	Araujo, A.C., et al., 2018. Spatial distance and climate determine modularity in a cross-biomes plant–hummingbird interaction network in Brazil. J. Biogeogr. 45, 1846–1858. https://doi.org/10.1111/jbi.13385
-13.12	-41.57	BA	Mucugê	Cerrado	Araujo, A.C., et al., 2018. Spatial distance and climate determine modularity in a cross-biomes plant–hummingbird interaction network in Brazil. J. Biogeogr. 45, 1846–1858. https://doi.org/10.1111/jbi.13386
-18.989	-48.302	MG	Uberlândia	Cerrado	Araujo, A.C., et al., 2018. Spatial distance and climate determine modularity in a cross-biomes plant–hummingbird interaction network in Brazil. J. Biogeogr. 45, 1846–1858. https://doi.org/10.1111/jbi.13387
-19.156	-48.39	MG	Uberlândia	Cerrado	Araujo, A.C., et al., 2018. Spatial distance and climate determine modularity in a cross-biomes plant–hummingbird interaction network in Brazil. J. Biogeogr. 45, 1846–1858. https://doi.org/10.1111/jbi.13388
-17.778	-48.679	GO	Caldas Novas	Cerrado	Araujo, A.C., et al., 2018. Spatial distance and climate determine modularity in a cross-biomes plant–hummingbird interaction network in Brazil. J. Biogeogr. 45, 1846–1858. https://doi.org/10.1111/jbi.13389
-20.443	-54.646	MS	Campo Grande	Cerrado	Araujo, A.C., et al., 2018. Spatial distance and climate determine modularity in a cross-biomes plant–hummingbird interaction network in Brazil. J. Biogeogr. 45, 1846–1858. https://doi.org/10.1111/jbi.13390
-7.89	-36.403	PE	Santa Cruz do Capibaribe	Caatinga	Araujo, A.C., et al., 2018. Spatial distance and climate determine modularity in a cross-biomes plant–hummingbird interaction network in Brazil. J. Biogeogr. 45, 1846–1858. https://doi.org/10.1111/jbi.13391
-11.48	-41.32	BA	Morro do Chapéu	Caatinga	Araujo, A.C., et al., 2018. Spatial distance and climate determine modularity in a cross-biomes plant–hummingbird interaction network in Brazil. J. Biogeogr. 45, 1846–1858. https://doi.org/10.1111/jbi.13392
-13.12	-41.58	BA	Mucugê	Caatinga	Araujo, A.C., et al., 2018. Spatial distance and climate determine modularity in a cross-biomes plant–hummingbird interaction network in Brazil. J. Biogeogr. 45, 1846–1858. https://doi.org/10.1111/jbi.13393
-12.98	-41.33	BA	Chapada diamantina	Rupestrian Fields	Araujo, A.C., et al., 2018. Spatial distance and climate determine modularity in a cross-biomes plant–hummingbird interaction network in Brazil. J. Biogeogr. 45, 1846–1858. https://doi.org/10.1111/jbi.13394
-19.25	-43.52	MG	Serra do cipó	Rupestrian Fields	Araujo, A.C., et al., 2018. Spatial distance and climate determine modularity in a cross-biomes plant–hummingbird interaction network in Brazil. J. Biogeogr. 45, 1846–1858. https://doi.org/10.1111/jbi.13395
-19.517	-56.983	MS	Corumbá	Pantanal	Araujo, A.C., et al., 2018. Spatial distance and climate determine modularity in a cross-biomes plant–hummingbird interaction network in Brazil. J. Biogeogr. 45, 1846–1858. https://doi.org/10.1111/jbi.13396
-19.567	-57.017	MS	Corumbá	Pantanal	Araujo, A.C., et al., 2018. Spatial distance and climate determine modularity in a cross-biomes plant–hummingbird interaction network in Brazil. J. Biogeogr. 45, 1846–1858. https://doi.org/10.1111/jbi.13397
-18.88446467746909,	-48.26	MG	Uberlândia	Cerrado	Maruyama, P.K., et al., 2019. Plant-hummingbird interaction networks in urban areas: Generalization and the importance of trees with specialized flowers as a nectar resource for pollinator conservation. Biol. Conserv. 230, 187–194.
-21.986894629982366,	-47.8774	SP	São Carlos	Atlantic Forest	Maruyama, P.K., et al., 2019. Plant-hummingbird interaction networks in urban areas: Generalization and the importance of trees with specialized flowers as a nectar resource for pollinator conservation. Biol. Conserv. 230, 187–194.
22°49'13"S	47°04'06"W	SP	Campinas	Atlantic Forest	Maruyama, P.K., et al., 2019. Plant-hummingbird interaction networks in urban areas: Generalization and the importance of trees with specialized flowers as a nectar resource for pollinator conservation. Biol. Conserv. 230, 187–194.
-22.820297548518223,	-47.0684	PR	Londrina	Atlantic Forest	Maruyama, P.K., et al., 2019. Plant-hummingbird interaction networks in urban areas: Generalization and the importance of trees with specialized flowers as a nectar resource for pollinator conservation. Biol. Conserv. 230, 187–194.
-27.890334662424447,	-52.2276	RS	Getúlio Vargas	Pampas	Maruyama, P.K., et al., 2019. Plant-hummingbird interaction networks in urban areas: Generalization and the importance of trees with specialized flowers as a nectar resource for pollinator conservation. Biol. Conserv. 230, 187–194.
-31.80163019118397,	-52.4168	RS	Capão do Leão	Pampas	Maruyama, P.K., et al., 2019. Plant-hummingbird interaction networks in urban areas: Generalization and the importance of trees with specialized flowers as a nectar resource for pollinator conservation. Biol. Conserv. 230, 187–194.
